# Supplementary material for: Exploring the bidirectional relationship between pain and mental disorders: a comprehensive Mendelian randomization study
Source: PubMed Central journal article supplement (PMC10326936; doi:10.1186/s10194-023-01612-2), 2023-07-07

### **Supplementary file 3**

MR results of localized pain on risk of sleeplessness/insomnia,  
anxiety/panic attacks and depression with scatter plots

**Single-variable MR results of localized pain on risk of sleeplessness/insomnia, anxiety/panic attacks and depression**

| Exposure                    | Method          | Sleeplessness / insomnia |                     |         | Anxiety/panic attacks |                  |         | Depression |                  |         |
|-----------------------------|-----------------|--------------------------|---------------------|---------|-----------------------|------------------|---------|------------|------------------|---------|
|                             |                 | N SNV                    | OR (95%CI)          | P value | N SNV                 | OR (95%CI)       | P value | N SNV      | OR (95%CI)       | P value |
| Headache                    | IVW (FEM)       | 45                       | 1.14 (1.05-1.24)    | 0.003   | 45                    | 1.00 (0.99-1.02) | 0.56    | 45         | 1.06 (1.03-1.08) | <0.001  |
|                             | IVW (REM)       | 45                       | 1.14 (1.01-1.28)    | 0.04    | 45                    | 1.00 (0.99-1.02) | 0.63    | 45         | 1.06 (1.02-1.09) | <0.001  |
|                             | Weighted median | 45                       | 1.15 (1.02-1.31)    | 0.03    | 45                    | 1.00 (0.98-1.03) | 0.69    | 45         | 1.04 (1.01-1.08) | 0.02    |
|                             | MR Egger        | 45                       | 0.92 (0.65-1.30)    | 0.62    | 45                    | 1.00 (0.95-1.05) | 0.91    | 45         | 1.01 (0.93-1.11) | 0.77    |
| Facial pain*                | IVW (FEM)       | 16                       | 1.31 (0.69-2.49)    | 0.41    | 16                    | 1.00 (0.90-1.11) | 0.98    | 16         | 1.13 (0.95-1.35) | 0.16    |
|                             | IVW (REM)       | 16                       | 1.31 (0.68-2.54)    | 0.42    | 16                    | 1.00 (0.88-1.14) | 0.99    | 16         | 1.13 (0.94-1.36) | 0.18    |
|                             | Weighted median | 16                       | 2.01 (0.82-4.91)    | 0.13    | 16                    | 1.01 (0.87-1.17) | 0.91    | 16         | 1.08 (0.84-1.39) | 0.55    |
|                             | MR Egger        | 16                       | 5.22 (0.30-90.81)   | 0.28    | 16                    | 0.80 (0.45-1.41) | 0.45    | 16         | 1.08 (0.47-2.45) | 0.86    |
| Neck or shoulder pain       | IVW (FEM)       | 6                        | 1.95 (1.50-2.54)    | <0.001  | 6                     | 1.00 (0.96-1.04) | 0.96    | 6          | 1.09 (1.01-1.17) | 0.02    |
|                             | IVW (REM)       | 6                        | 1.95 (1.03-3.68)    | 0.03    | 6                     | 1.00 (0.96-1.04) | 0.96    | 6          | 1.09 (1.00-1.18) | 0.04    |
|                             | Weighted median | 6                        | 1.97 (1.32-2.94)    | <0.001  | 6                     | 1.00 (0.95-1.06) | 0.95    | 6          | 1.10 (1.01-1.21) | 0.04    |
|                             | MR Egger        | 6                        | 2.39 (0.11-50.76)   | 0.61    | 6                     | 1.07 (0.89-1.30) | 0.50    | 6          | 1.07 (0.73-1.58) | 0.73    |
| Back pain                   | IVW (FEM)       | 20                       | 1.40 (1.22-1.60)    | <0.001  | 20                    | 1.00 (0.98-1.02) | 0.94    | 19         | 1.08 (1.04-1.13) | <0.001  |
|                             | IVW (REM)       | 20                       | 1.40 (1.18-1.65)    | <0.001  | 20                    | 1.00 (0.98-1.02) | 0.94    | 19         | 1.08 (1.03-1.14) | 0.002   |
|                             | Weighted median | 20                       | 1.26 (1.04-1.54)    | 0.02    | 20                    | 1.01 (0.98-1.05) | 0.41    | 19         | 1.06 (1.00-1.11) | 0.03    |
|                             | MR Egger        | 20                       | 1.14 (0.60-2.20)    | 0.69    | 20                    | 0.97 (0.89-1.06) | 0.51    | 19         | 0.90 (0.71-1.13) | 0.37    |
| Stomach and abdominal pain* | IVW (FEM)       | 30                       | 1.79 (1.44-2.23)    | <0.001  | 30                    | 1.03 (1.00-1.07) | 0.06    | 28         | 1.19 (1.12-1.25) | <0.001  |
|                             | IVW (REM)       | 30                       | 1.79 (1.25-2.56)    | 0.001   | 30                    | 1.03 (0.99-1.08) | 0.13    | 28         | 1.19 (1.11-1.26) | <0.001  |
|                             | Weighted median | 30                       | 2.10 (1.50-2.95)    | <0.001  | 30                    | 1.03 (0.98-1.09) | 0.24    | 28         | 1.17 (1.07-1.28) | <0.001  |
|                             | MR Egger        | 30                       | 0.44 (0.14-1.37)    | 0.17    | 30                    | 0.91 (0.79-1.06) | 0.23    | 28         | 1.14 (0.86-1.50) | 0.37    |
| Hip pain                    | IVW (FEM)       | 4                        | 2.29 (1.18-4.45)    | <0.001  | 4                     | 1.01 (0.97-1.05) | 0.83    | 4          | 1.17 (1.03-1.33) | 0.01    |
|                             | IVW (REM)       | 4                        | 2.29 (1.46-3.60)    | 0.01    | 4                     | 1.01 (0.94-1.08) | 0.69    | 4          | 1.17 (0.94-1.46) | 0.16    |
|                             | Weighted median | 4                        | 1.76 (0.97-3.17)    | 0.06    | 4                     | 0.99 (0.91-1.07) | 0.81    | 4          | 1.13 (0.95-1.33) | 0.17    |
|                             | MR Egger        | 4                        | 22.35 (1.12-447.57) | 0.17    | 4                     | 1.12 (0.75-1.67) | 0.62    | 4          | 1.37 (0.32-5.89) | 0.71    |
| Knee pain                   | IVW (FEM)       | 11                       | 1.19 (0.99-1.42)    | 0.09    | 11                    | 0.99 (0.97-1.01) | 0.44    | 11         | 1.07 (1.03-1.12) | 0.004   |
|                             | IVW (REM)       | 11                       | 1.19 (0.83-1.71)    | 0.35    | 11                    | 0.99 (0.96-1.02) | 0.29    | 11         | 1.07 (1.02-1.13) | <0.001  |
|                             | Weighted median | 11                       | 0.99 (0.76-1.30)    | 0.96    | 11                    | 0.99 (0.95-1.03) | 0.55    | 11         | 1.08 (1.01-1.15) | 0.02    |
|                             | MR Egger        | 11                       | 0.41 (0.08-2.16)    | 0.32    | 11                    | 1.01 (0.88-1.17) | 0.84    | 11         | 1.10 (0.86-1.39) | 0.47    |
| None of above               | IVW (FEM)       | 37                       | 0.62 (0.56-0.67)    | <0.001  | 37                    | 0.98 (0.97-1.00) | 0.01    | 37         | 0.92 (0.90-0.95) | <0.001  |
|                             | IVW (REM)       | 37                       | 0.62 (0.54-0.70)    | <0.001  | 37                    | 0.98 (0.97-1.00) | 0.02    | 37         | 0.92 (0.90-0.95) | <0.001  |
|                             | Weighted median | 37                       | 0.68 (0.59-0.79)    | <0.001  | 37                    | 0.97 (0.95-0.99) | 0.005   | 37         | 0.92 (0.89-0.96) | <0.001  |
|                             | MR Egger        | 37                       | 0.90 (0.40-2.07)    | 0.81    | 37                    | 0.97 (0.88-1.08) | 0.61    | 37         | 1.00 (0.86-1.17) | 0.96    |

Abbreviations: MR, mendelian randomization; N SNV, number of single-nucleotide variants; IVW, inverse-variance weighted; FEM, fixed effects models; REM, random effects models; OR, odds ratio; GWAS, genome-wide association studies.

Genetic instruments selected from localized pain GWASs, selection threshold  $P$  less than  $5 \times 10^{-8}$ , pruned at linkage disequilibrium  $R^2$  less than 0.001 (10 000 kilobase pair window).

\* If the number of SNPs available for analysis is less than 3, the selection threshold  $P$  will be adjusted to  $5 \times 10^{-6}$ .

SNP effect on Non-cancer illness code self-reported: anxiety/panic attacks || id:ukb-a-82

### MR Test

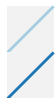

Inverse variance weighted (fixed effects)

Inverse variance weighted (multiplicative random effects)

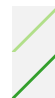

MR Egger

Weighted median

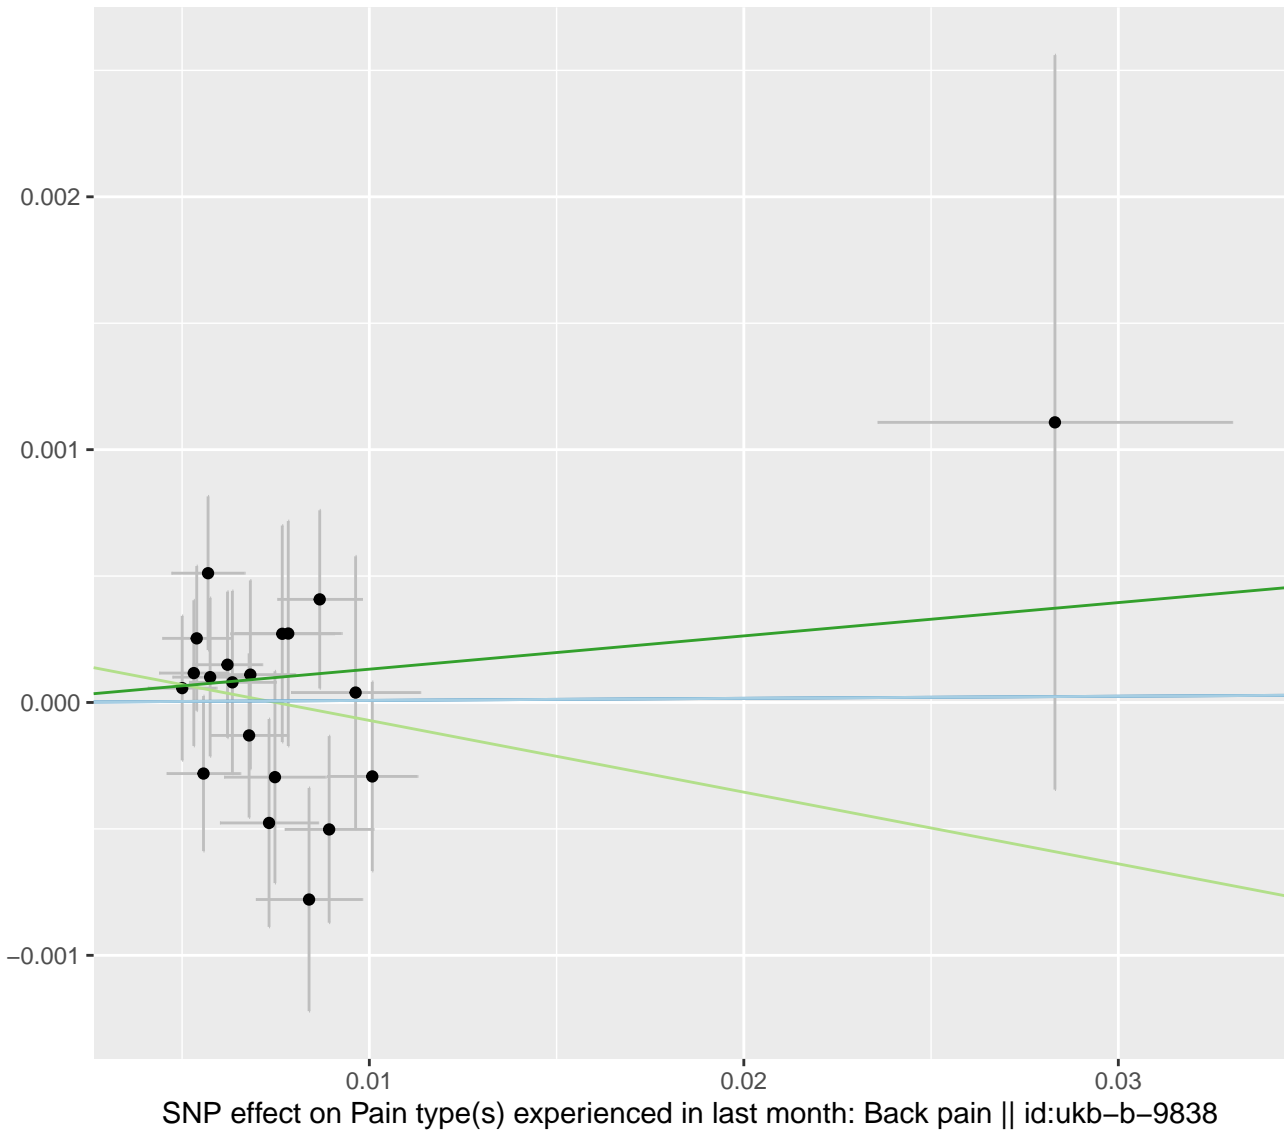

MR Test

Inverse variance weighted (fixed effects)  
Inverse variance weighted (multiplicative random effects)

MR Egger  
Weighted median

SNP effect on Non-cancer illness code, self-reported: depression || id:ukb-b-12064

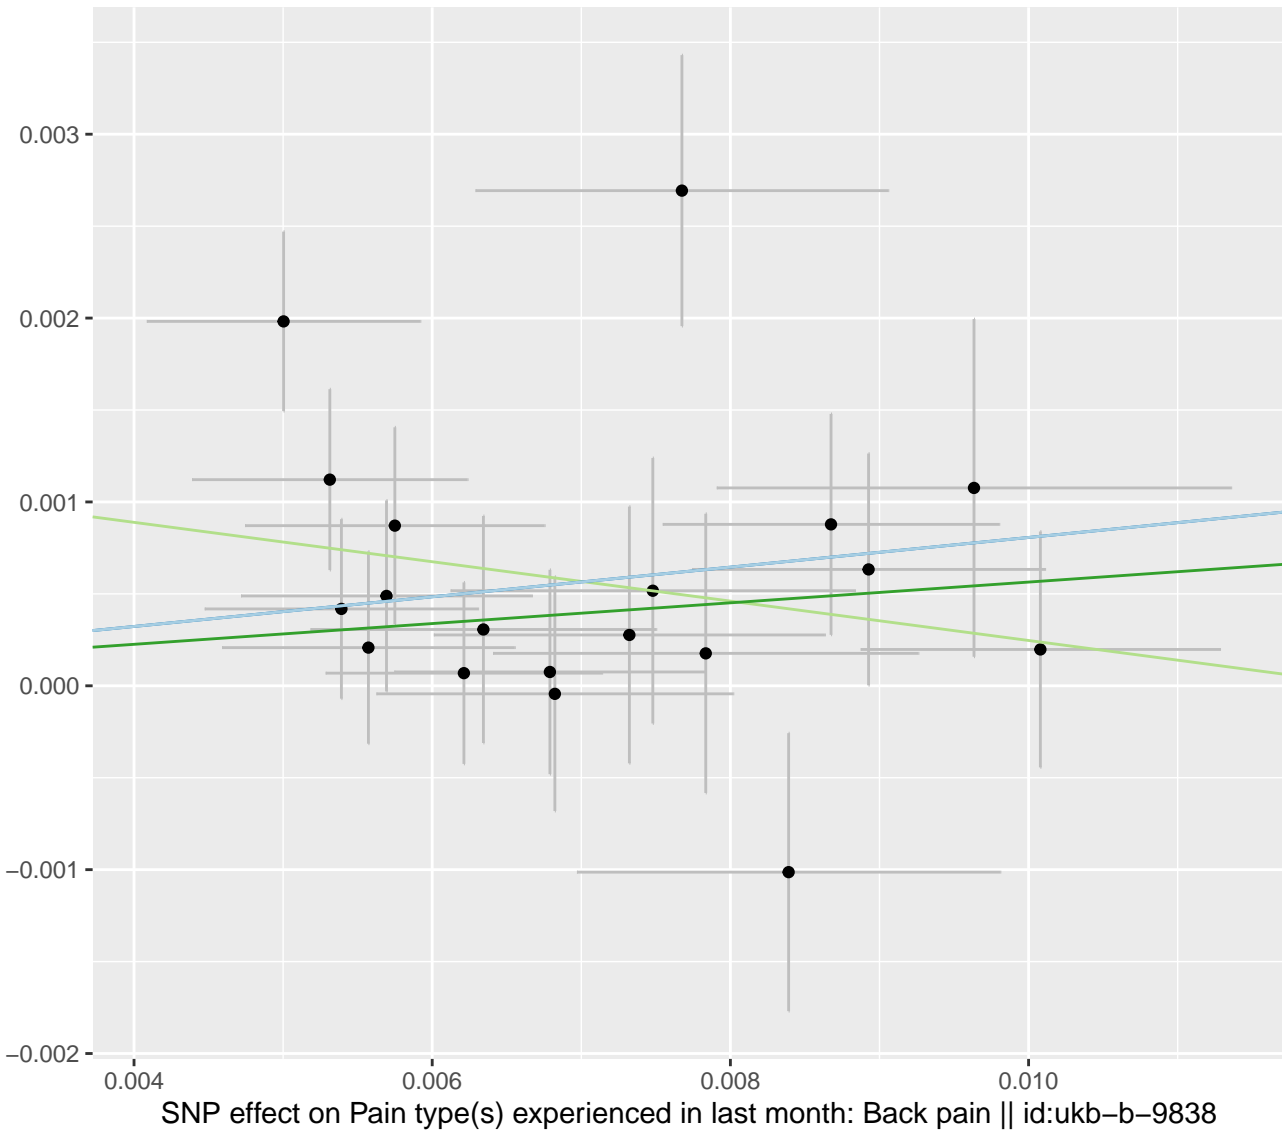

### MR Test

Inverse variance weighted (fixed effects)

Inverse variance weighted (multiplicative random effects)

MR Egger

Weighted median

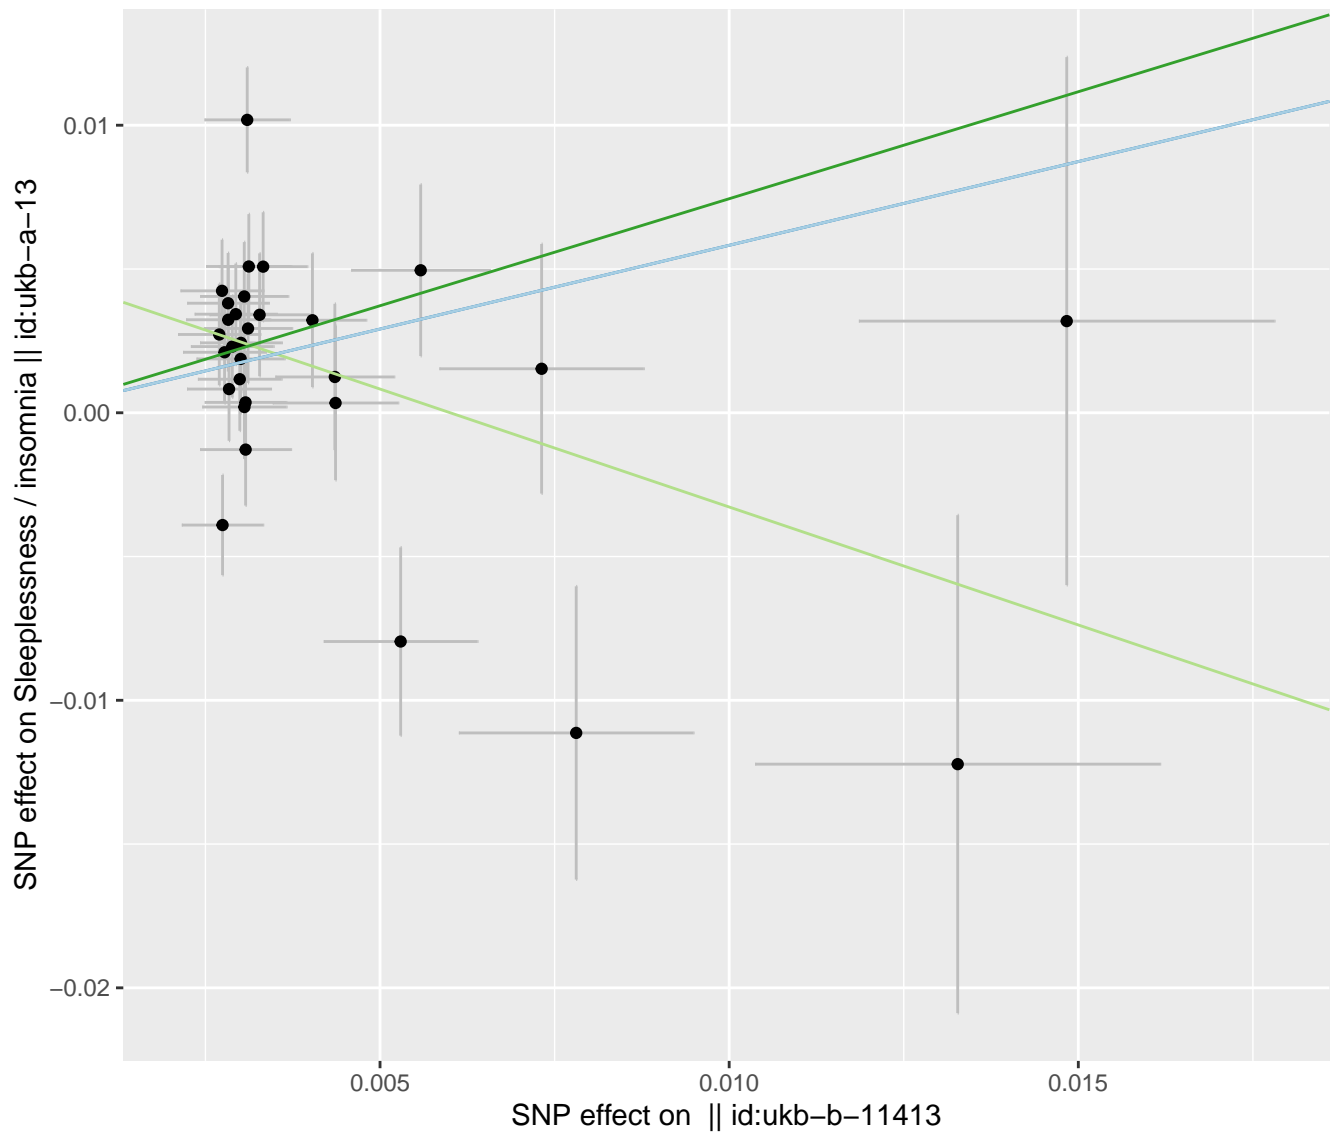

SNP effect on Non-cancer illness code self-reported: anxiety/panic attacks || id:ukb-a-82

MR Test

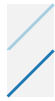

Inverse variance weighted (fixed effects)

Inverse variance weighted (multiplicative random effects)

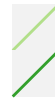

MR Egger

Weighted median

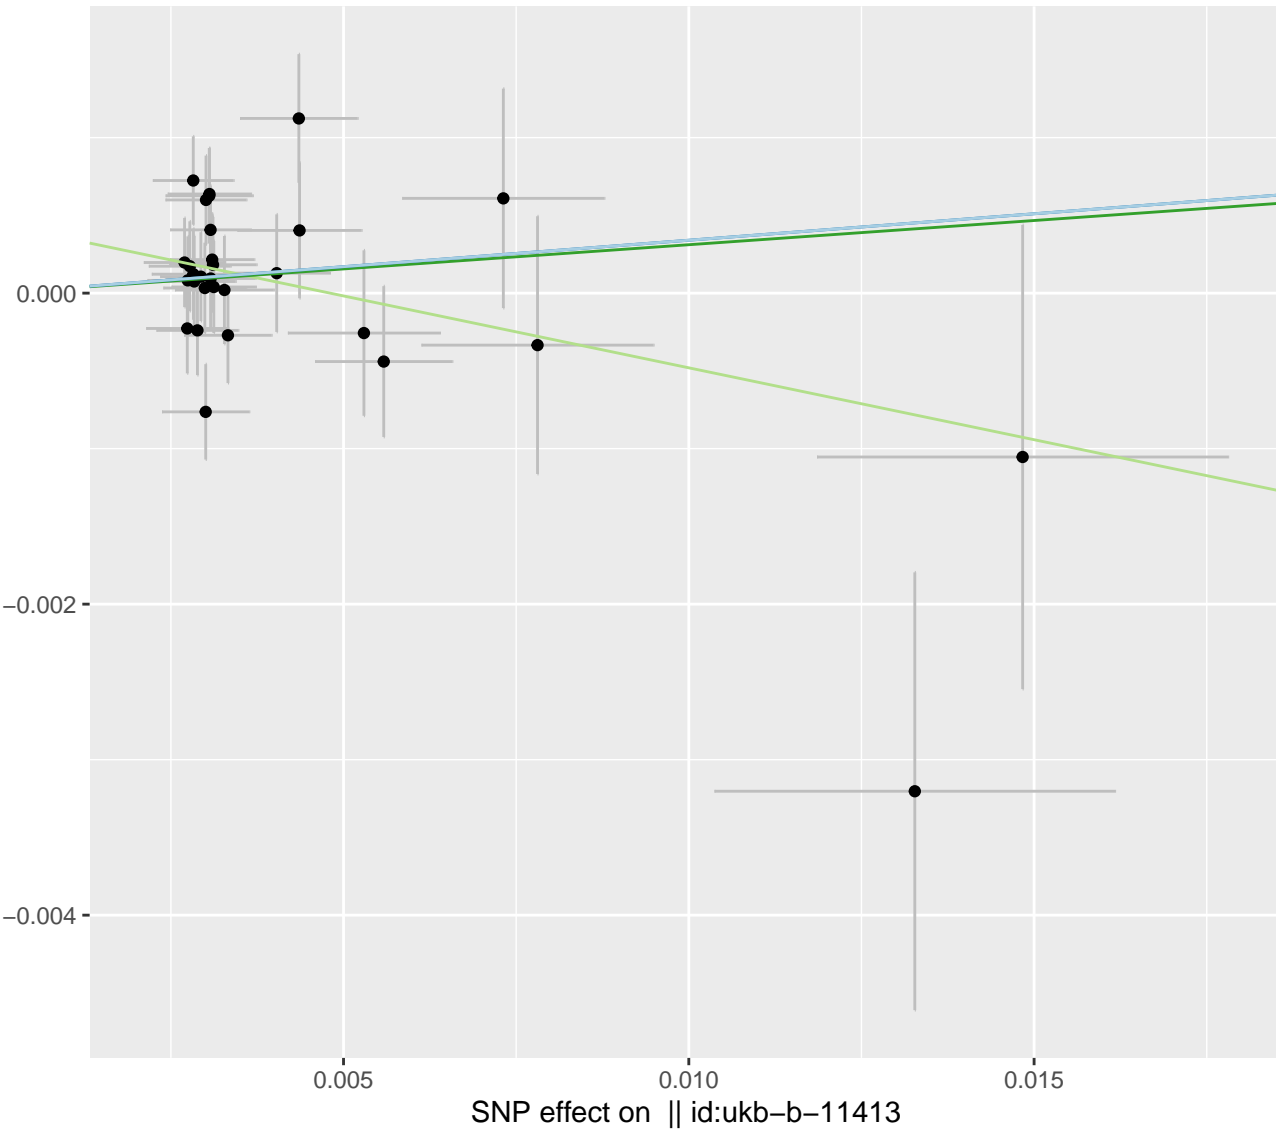

MR Test

Inverse variance weighted (fixed effects)

Inverse variance weighted (multiplicative random effects)

MR Egger

Weighted median

SNP effect on Non-cancer illness code, self-reported: depression || id:ukb-b-12064

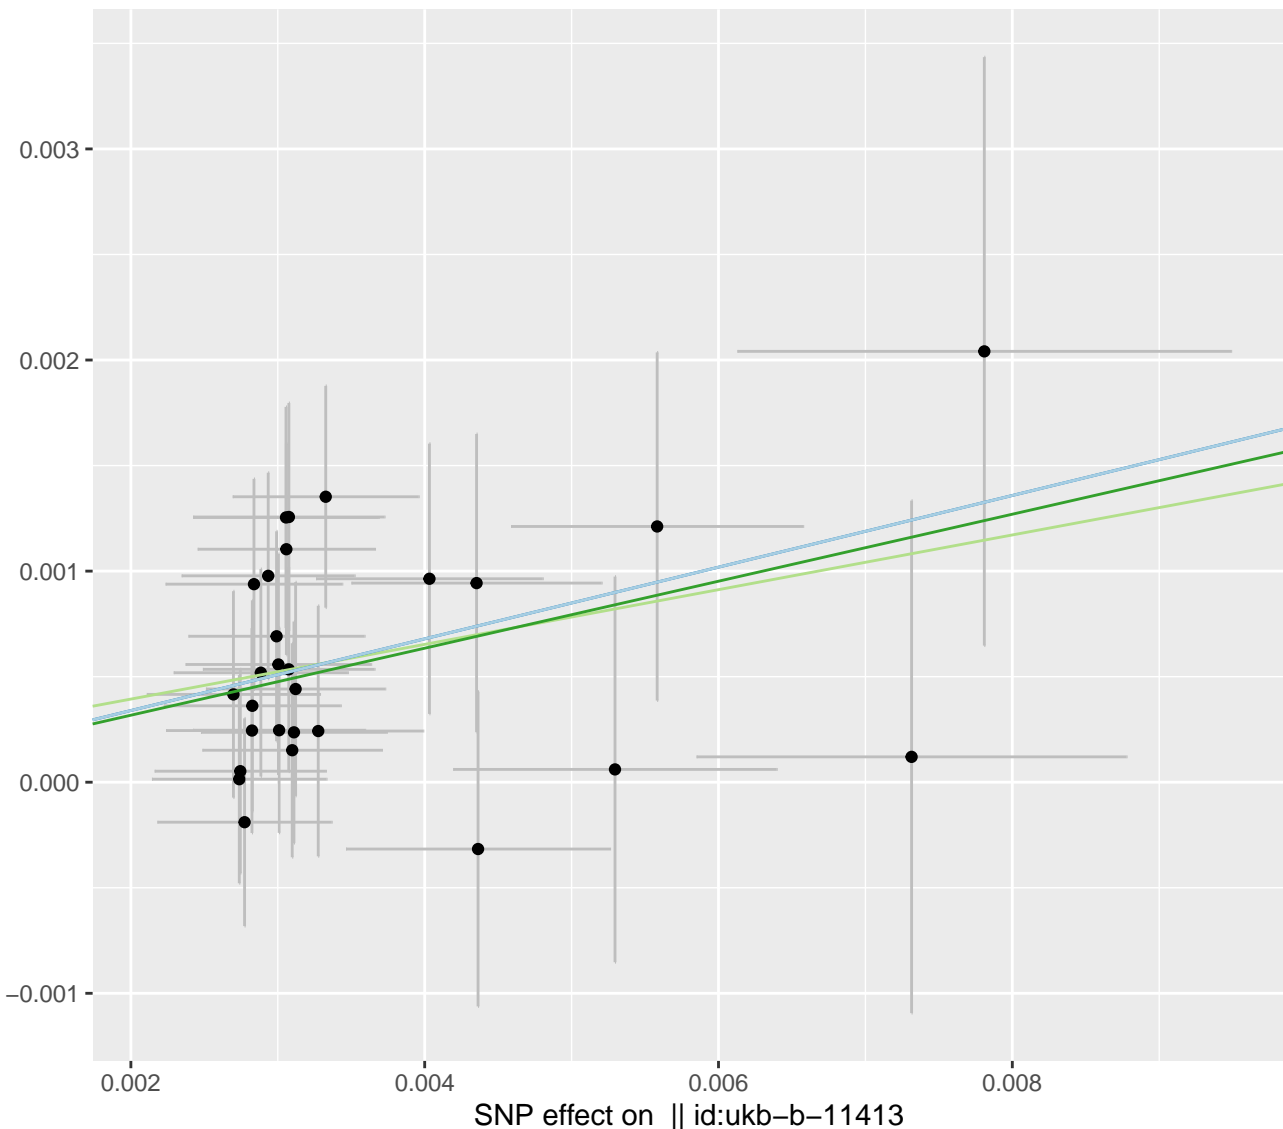

MR Test

Inverse variance weighted (fixed effects)

Inverse variance weighted (multiplicative random effects)

MR Egger

Weighted median

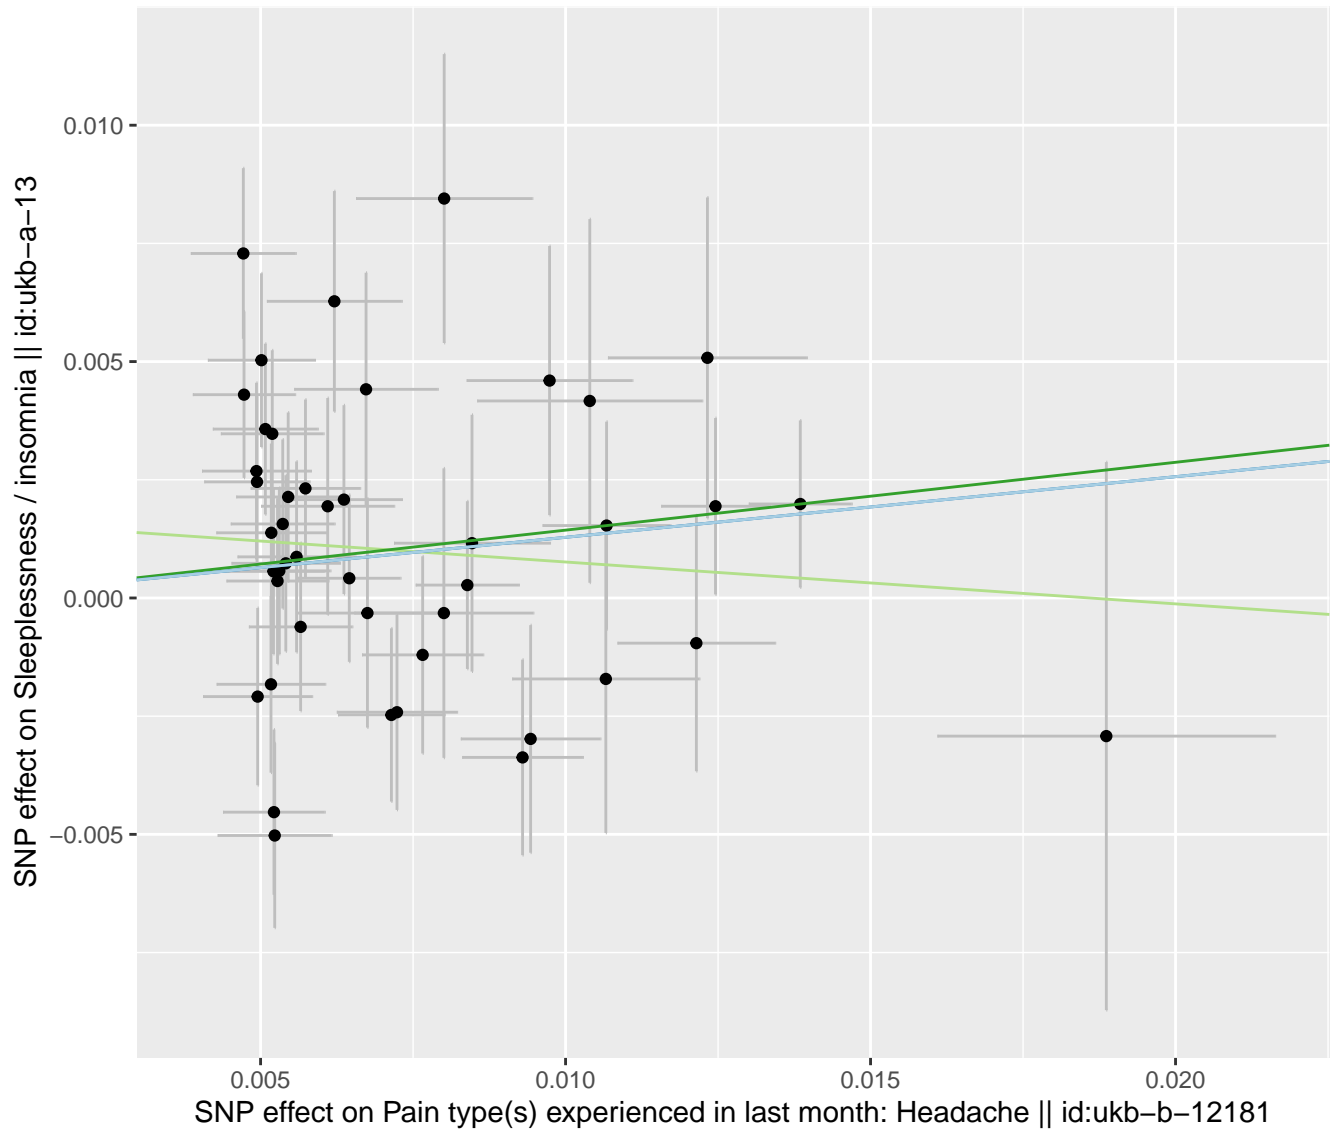



MR Test

- Inverse variance weighted (fixed effects)
- Inverse variance weighted (multiplicative random effects)

- MR Egger
- Weighted median

SNP effect on Non-cancer illness code self-reported: anxiety/panic attacks || id:ukb-a-82

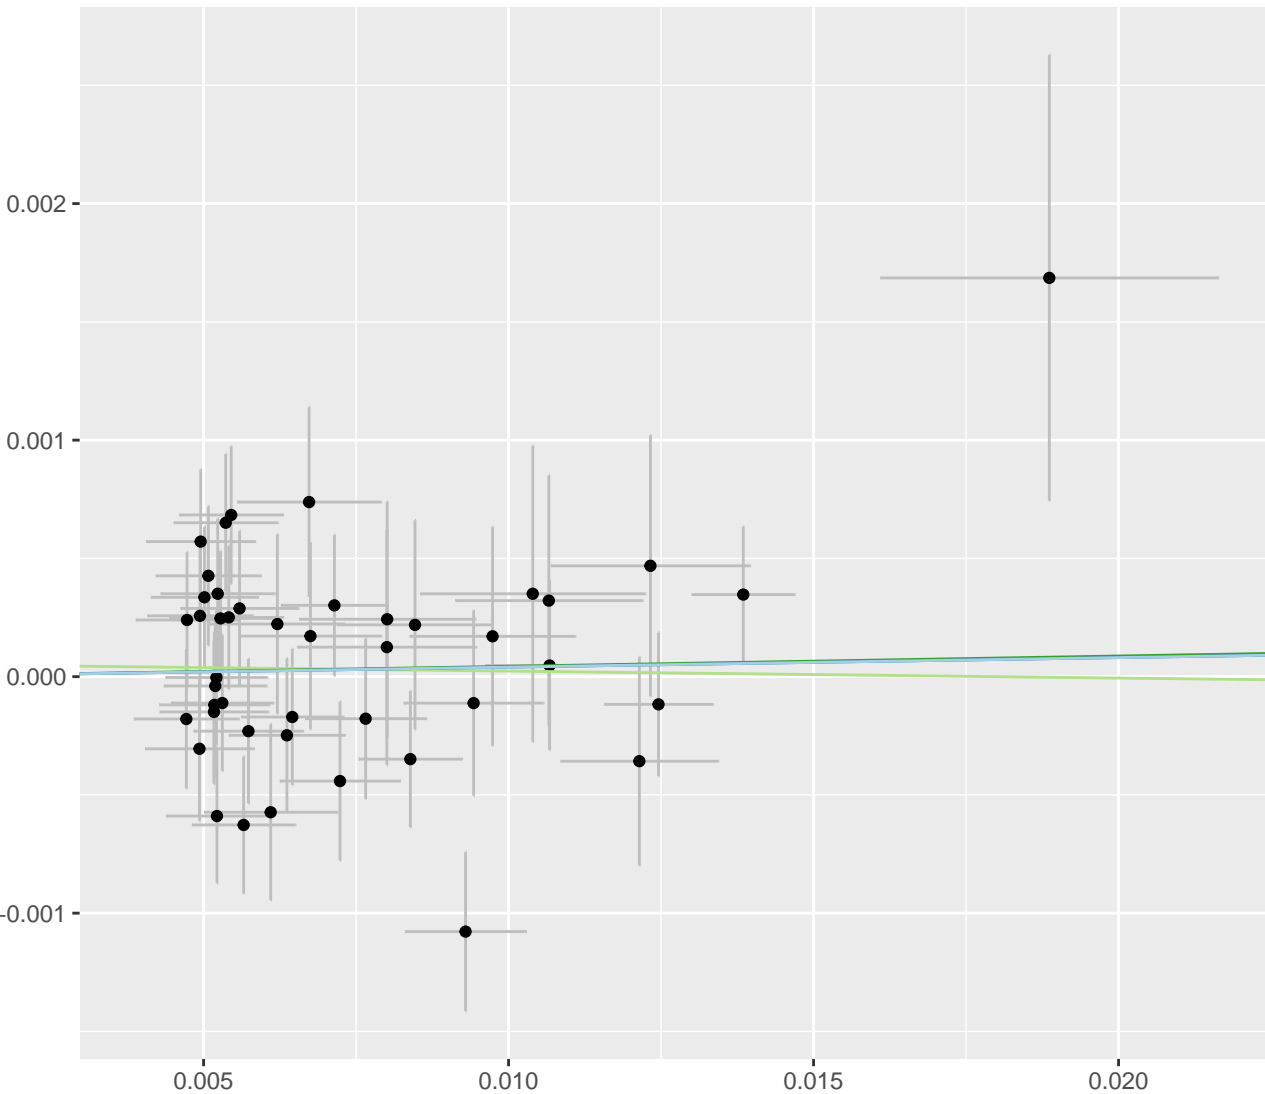

MR Test

Inverse variance weighted (fixed effects)

Inverse variance weighted (multiplicative random effects)

MR Egger

Weighted median

SNP effect on Non-cancer illness code, self-reported: depression || id:ukb-b-12064

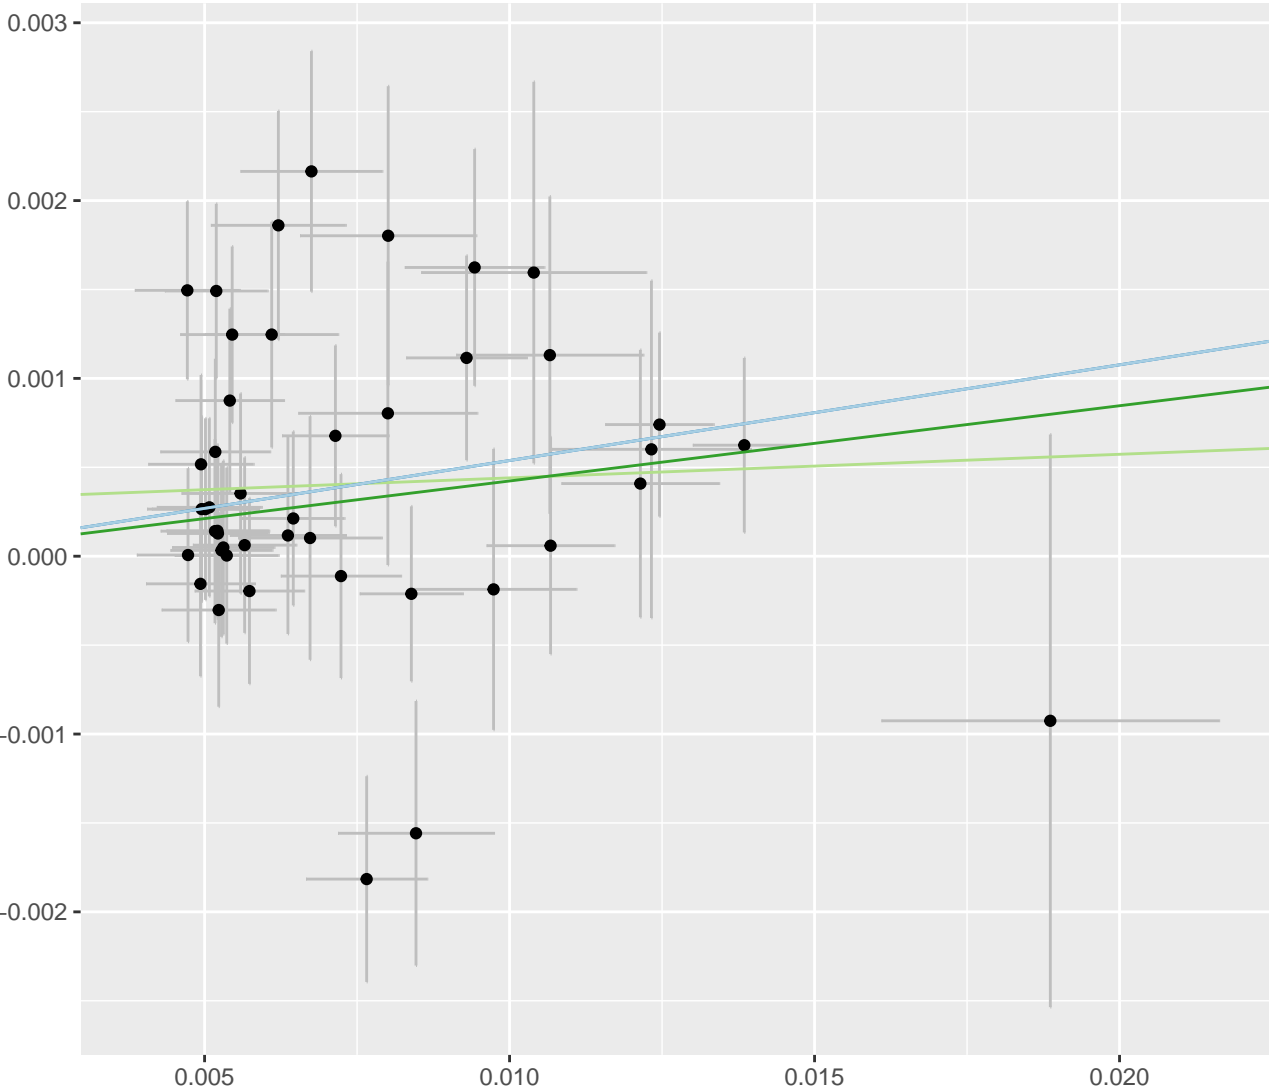

### MR Test

Inverse variance weighted (fixed effects)

Inverse variance weighted (multiplicative random effects)

MR Egger

Weighted median

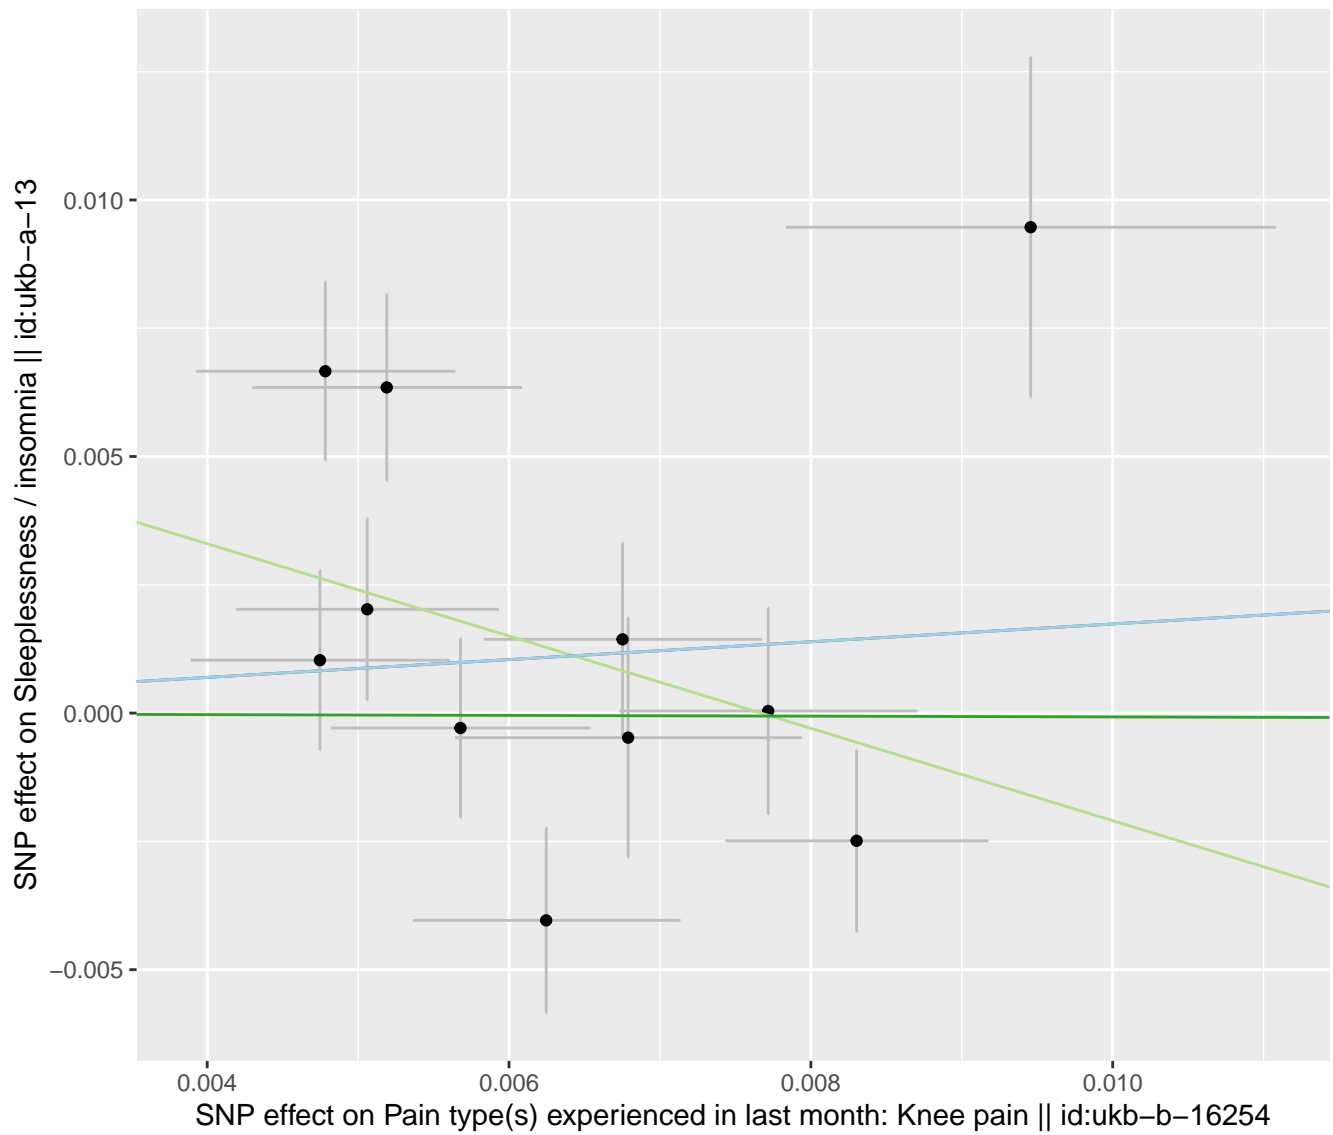

### MR Test

Inverse variance weighted (fixed effects)

Inverse variance weighted (multiplicative random effects)

MR Egger

Weighted median

SNP effect on Non-cancer illness code self-reported: anxiety/panic attacks || id:ukb-a-82

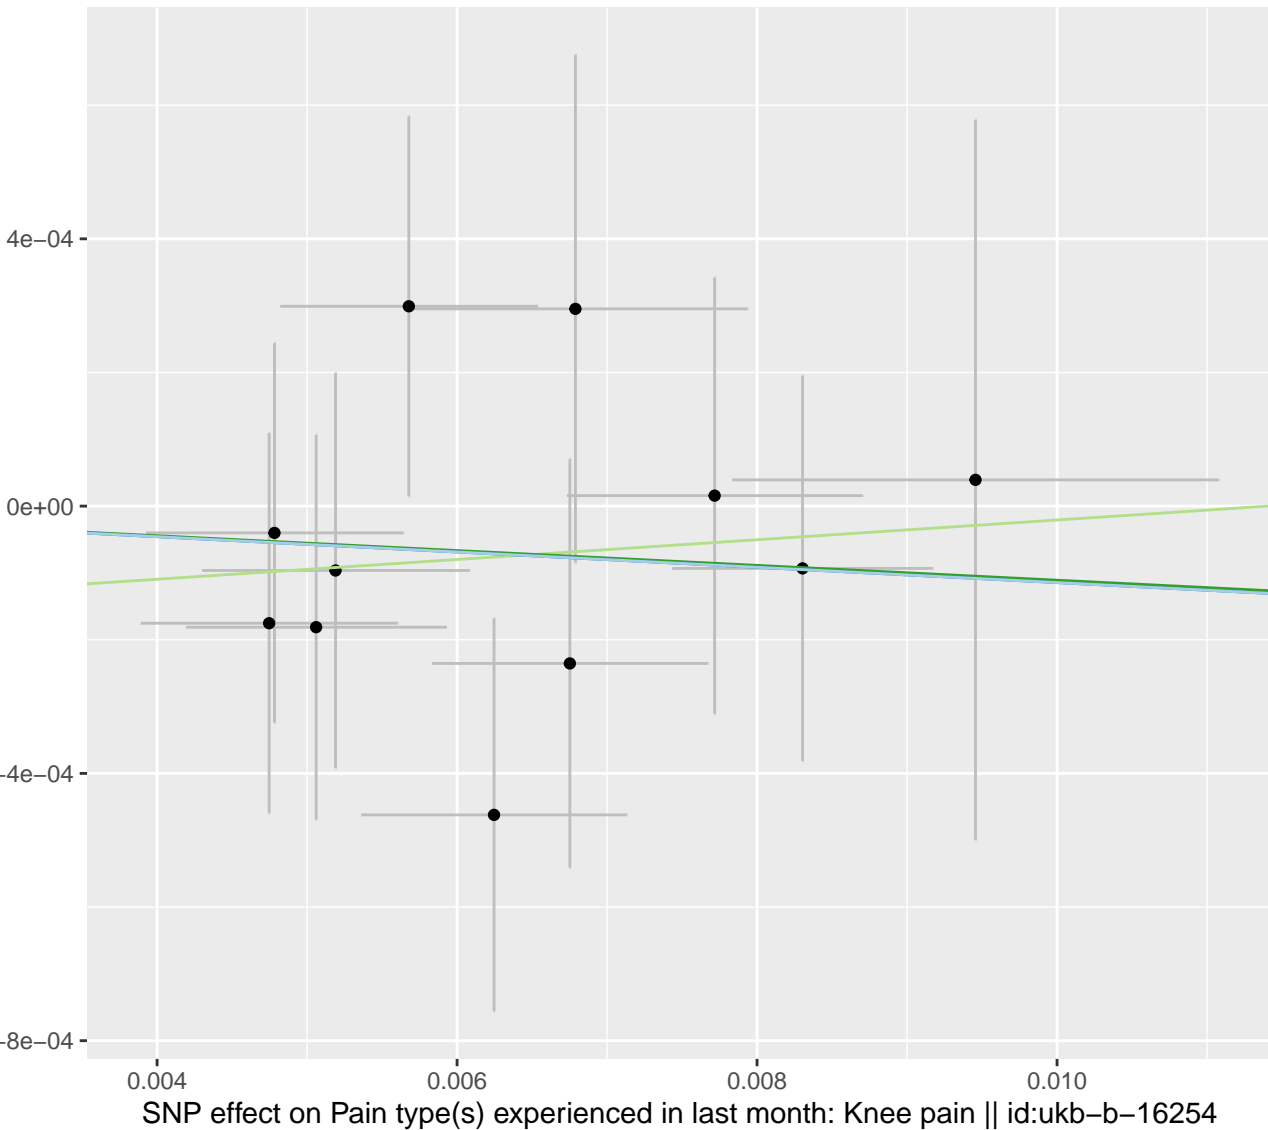

MR Test

Inverse variance weighted (fixed effects)

Inverse variance weighted (multiplicative random effects)

MR Egger

Weighted median

SNP effect on Non-cancer illness code, self-reported: depression || id:ukb-b-12064

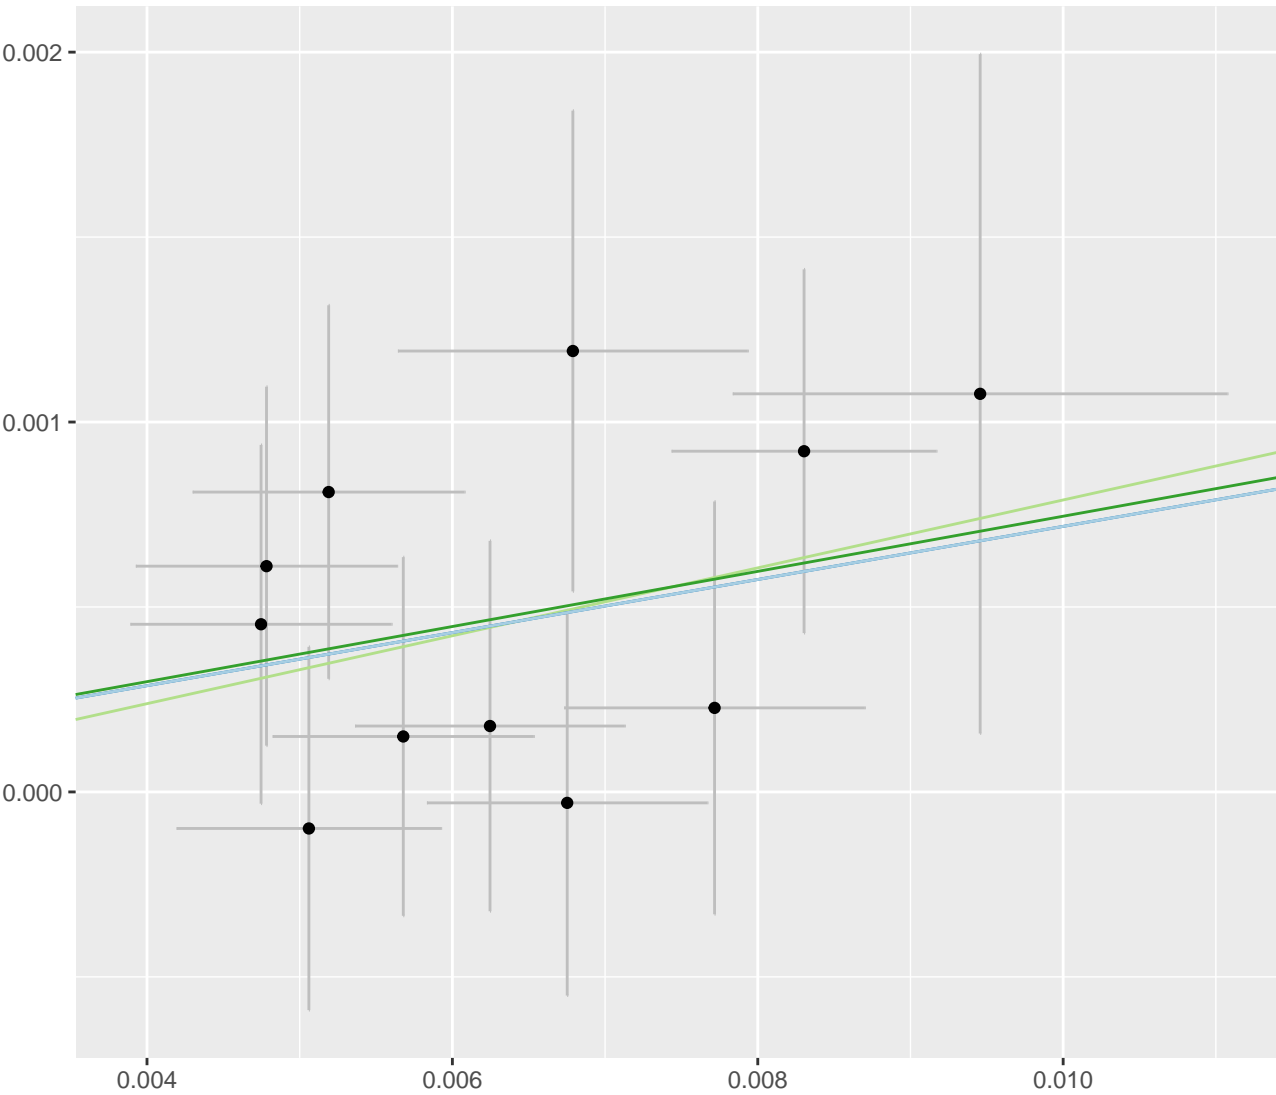

SNP effect on Pain type(s) experienced in last month: Knee pain || id:ukb-b-16254

### MR Test

Inverse variance weighted (fixed effects)  
Inverse variance weighted (multiplicative random effects)

MR Egger  
Weighted median

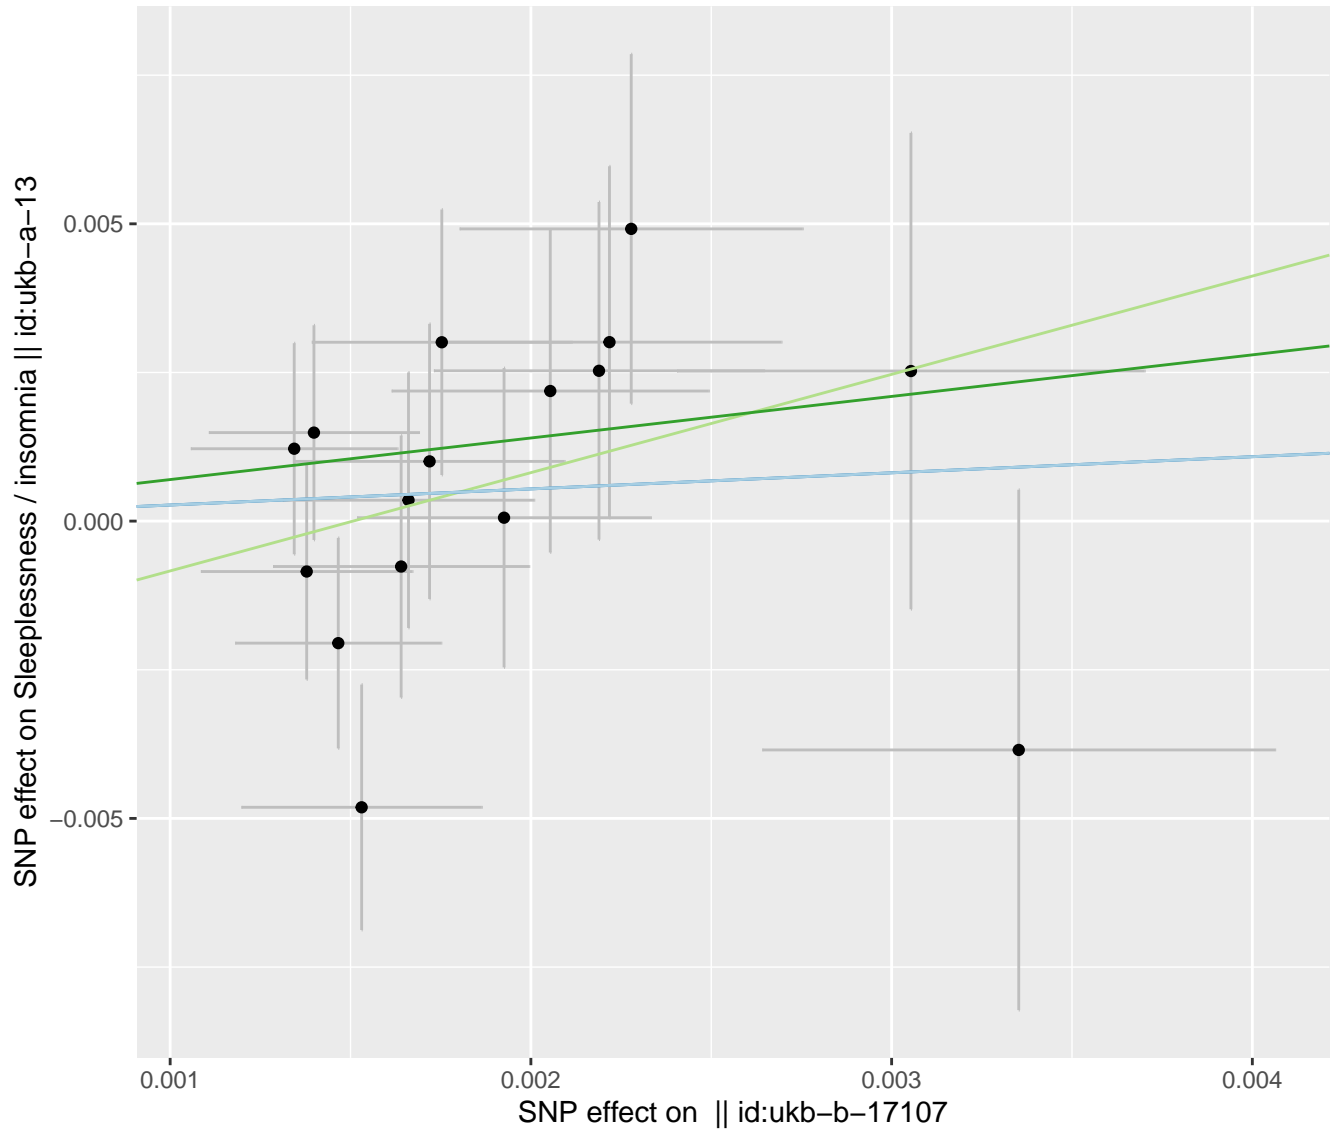

MR Test

- Inverse variance weighted (fixed effects)
- Inverse variance weighted (multiplicative random effects)

- MR Egger
- Weighted median

SNP effect on Non-cancer illness code self-reported: anxiety/panic attacks || id:ukb-a-82

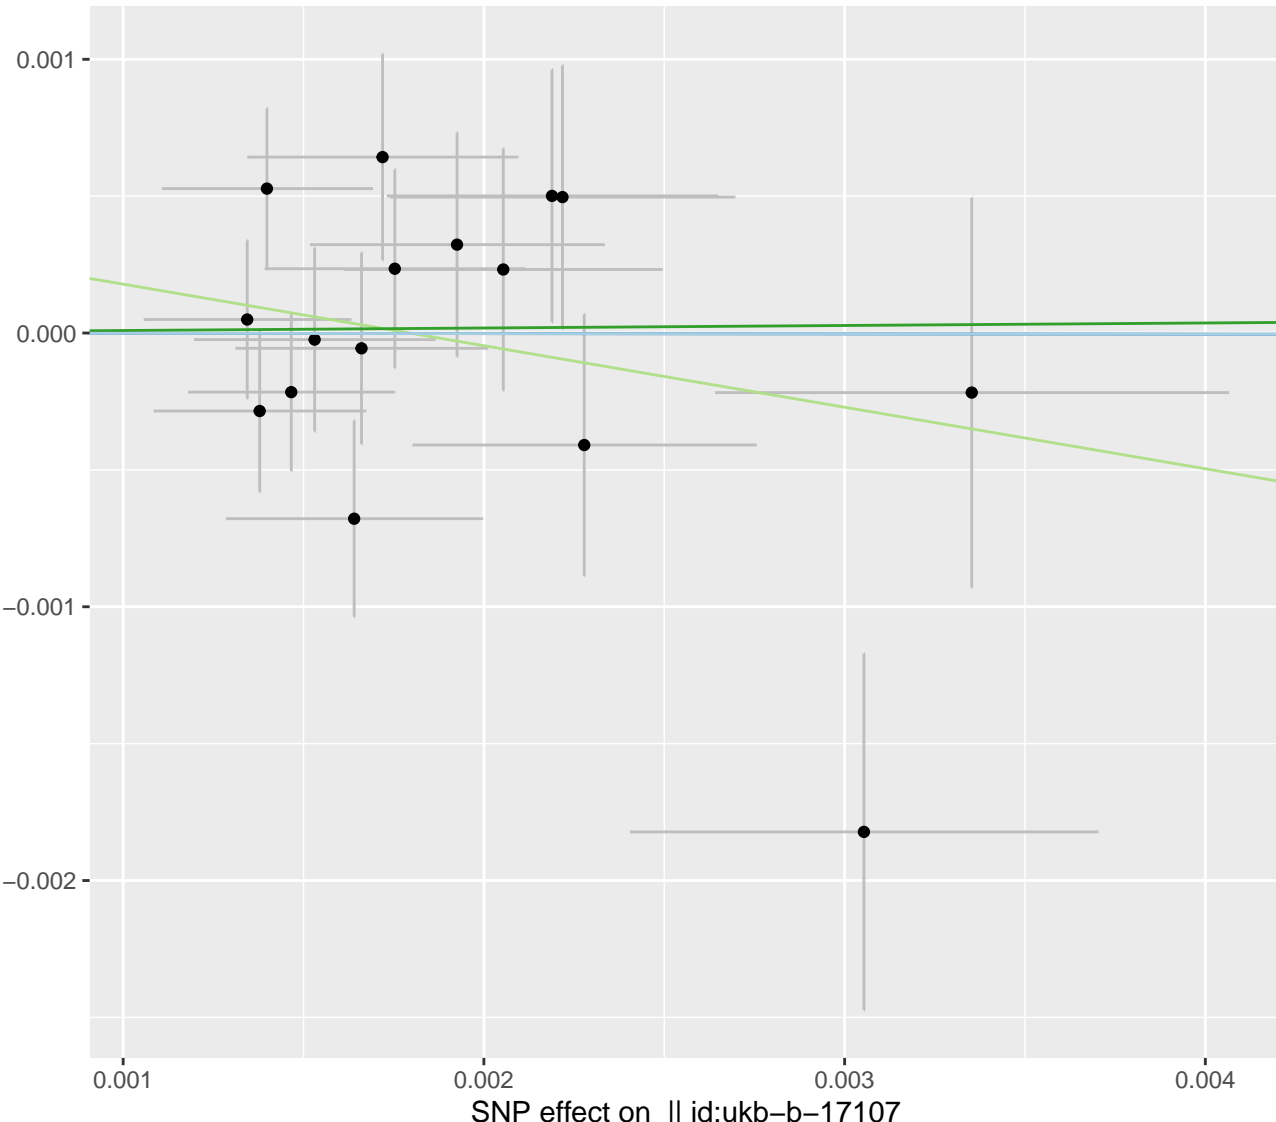

### MR Test

Inverse variance weighted (fixed effects)

Inverse variance weighted (multiplicative random effects)

MR Egger

Weighted median

SNP effect on Non-cancer illness code, self-reported: depression || id:ukb-b-12064

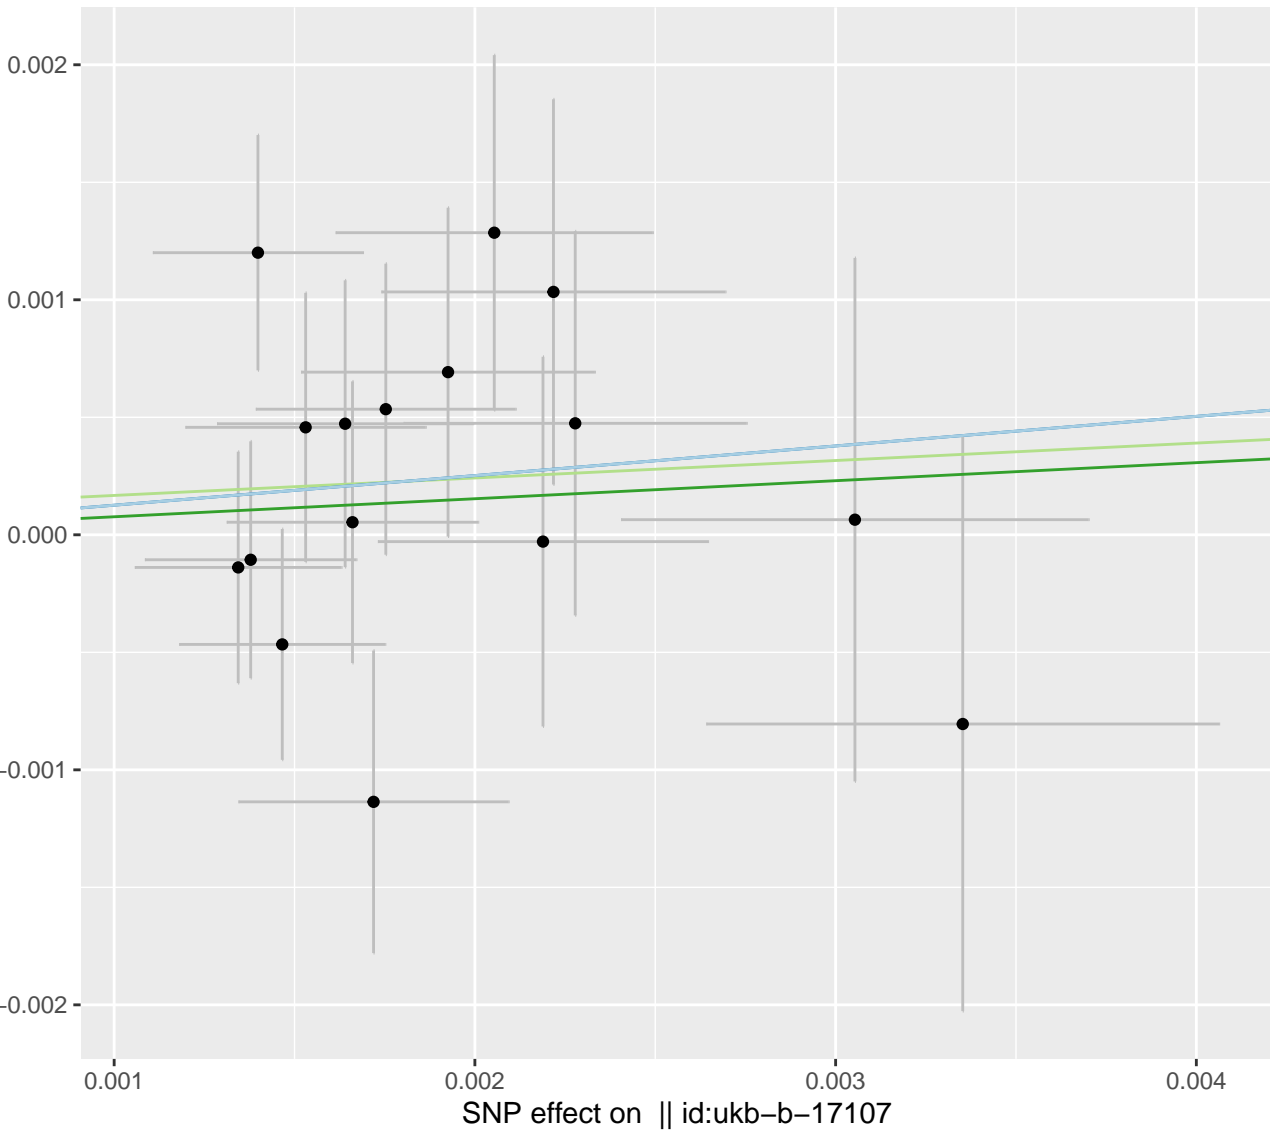



### MR Test

- Inverse variance weighted (fixed effects)
- Inverse variance weighted (multiplicative random effects)
- MR Egger
- Weighted median

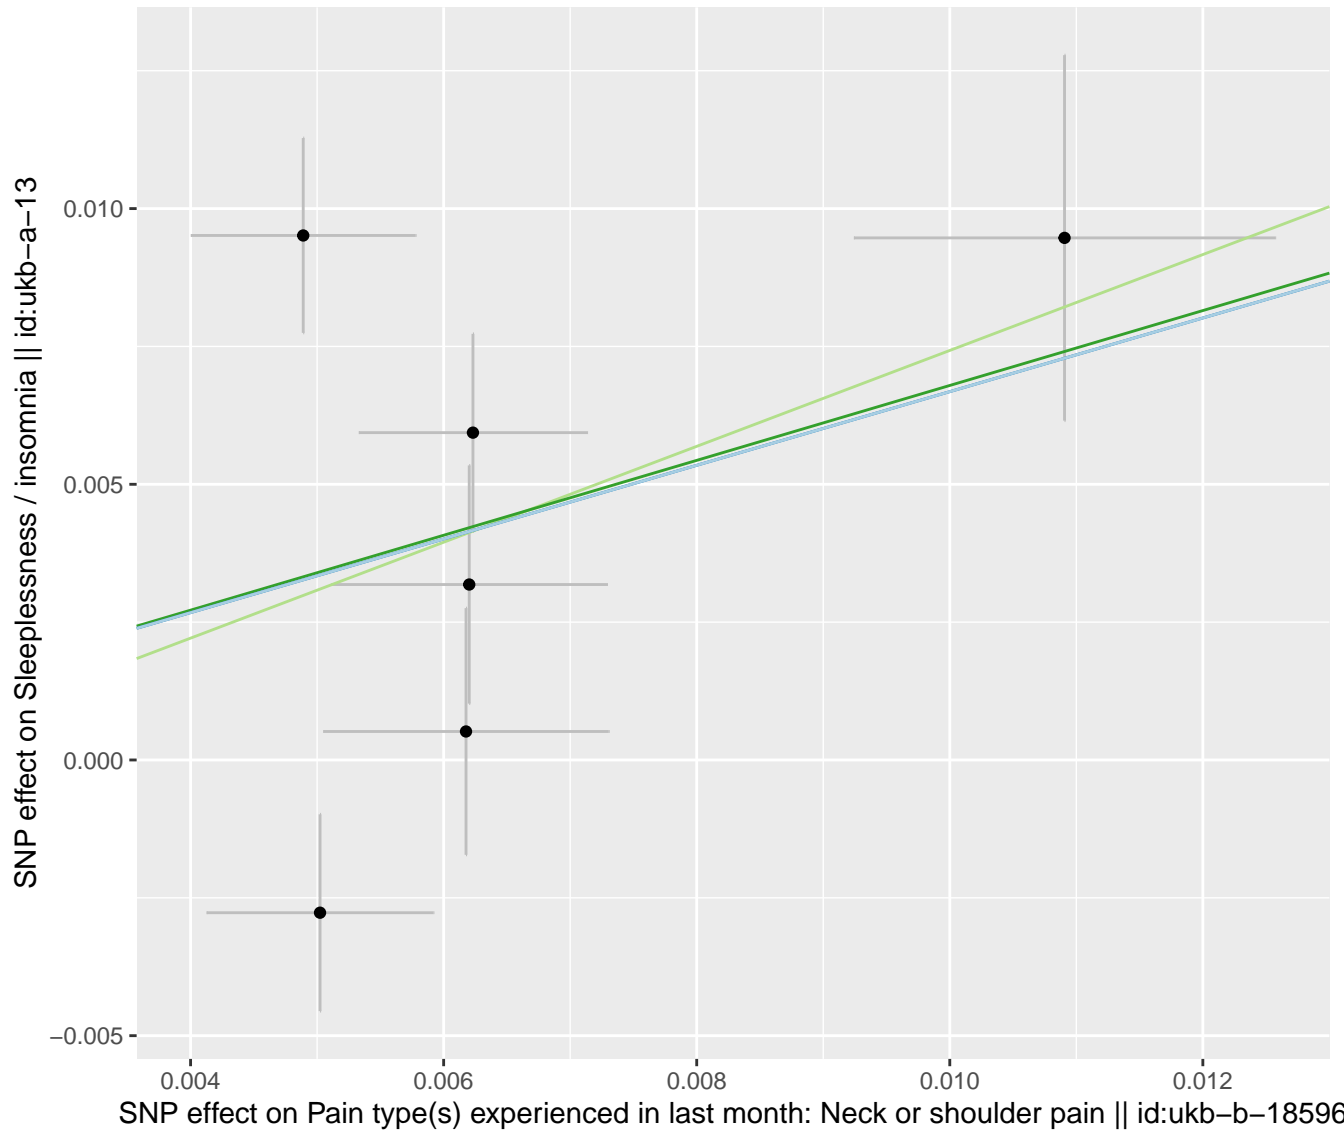

SNP effect on Non-cancer illness code self-reported: anxiety/panic attacks || id:ukb-a-82

### MR Test

Inverse variance weighted (fixed effects)  
Inverse variance weighted (multiplicative random effects)

MR Egger  
Weighted median

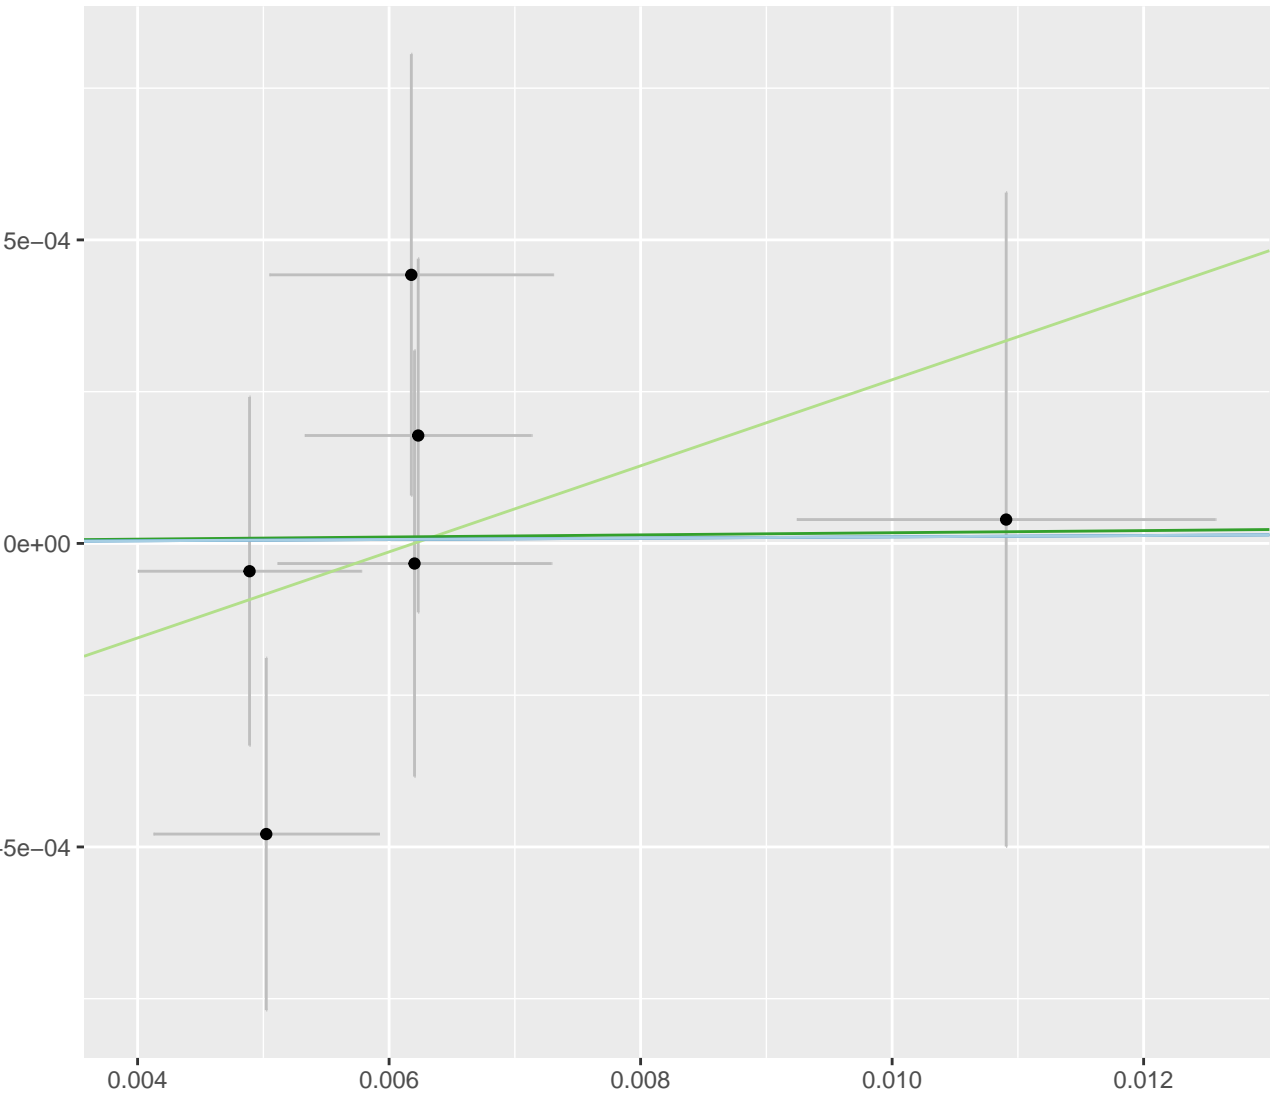

SNP effect on Pain type(s) experienced in last month: Neck or shoulder pain || id:ukb-b-18596

MR Test

Inverse variance weighted (fixed effects)  
Inverse variance weighted (multiplicative random effects)

MR Egger  
Weighted median

SNP effect on Non-cancer illness code, self-reported: depression || id:ukb-b-12064

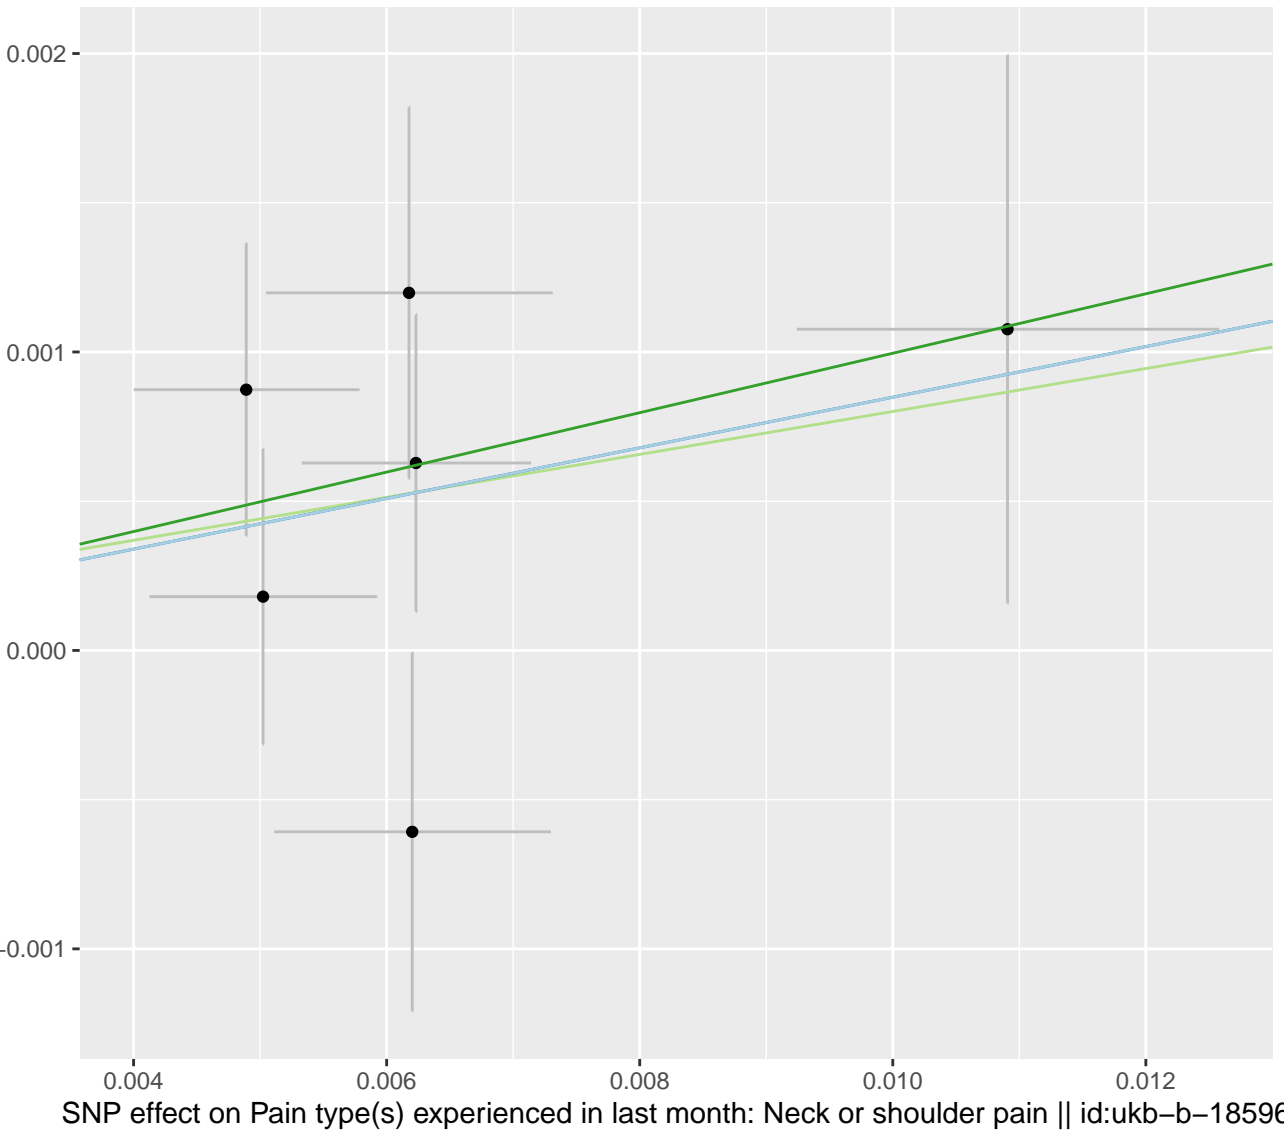

MR Test

- Inverse variance weighted (fixed effects)
- Inverse variance weighted (multiplicative random effects)
- MR Egger
- Weighted median

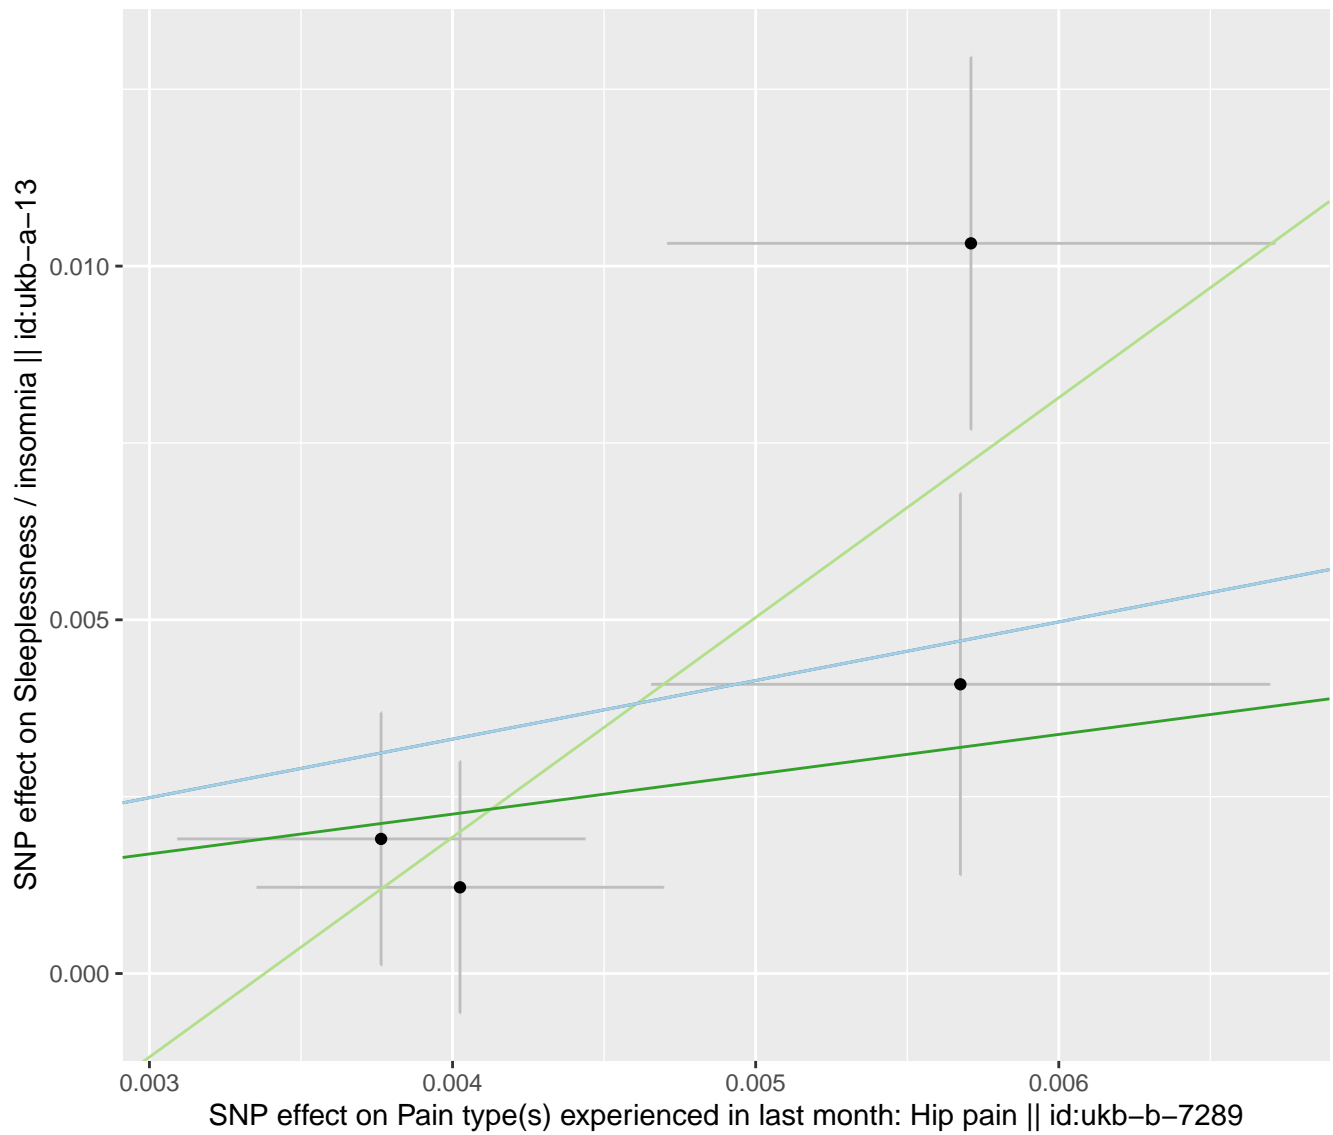

SNP effect on Non-cancer illness code self-reported: anxiety/panic attacks || id:ukb-a-82

### MR Test

- Inverse variance weighted (fixed effects)
- Inverse variance weighted (multiplicative random effects)
- MR Egger
- Weighted median

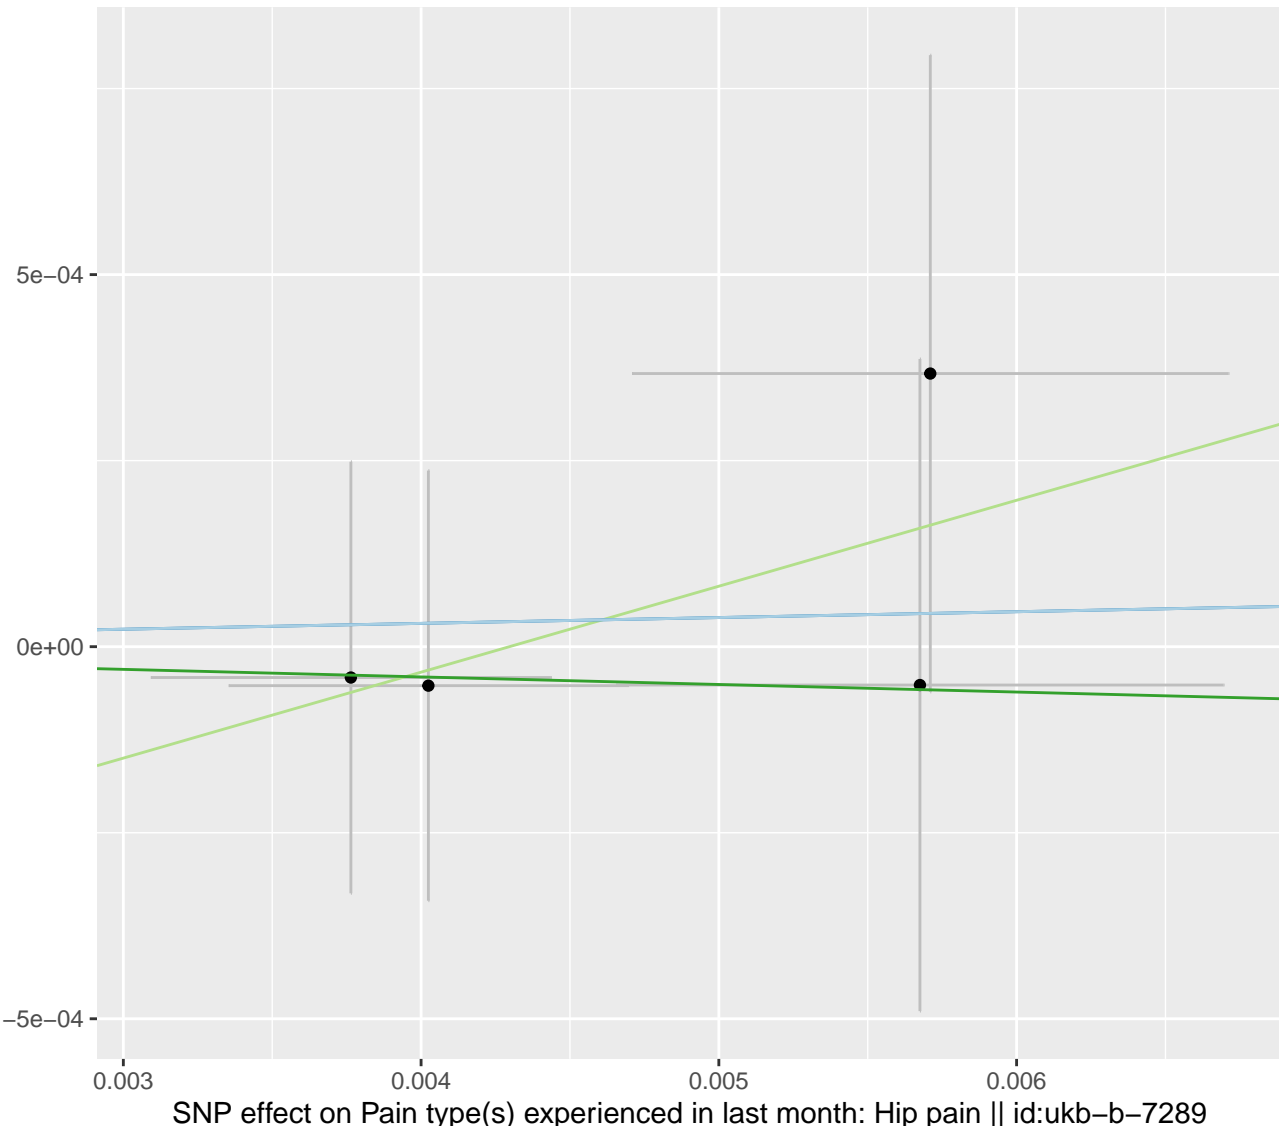

### MR Test

Inverse variance weighted (fixed effects)  
Inverse variance weighted (multiplicative random effects)

MR Egger  
Weighted median

SNP effect on Non-cancer illness code, self-reported: depression || id:ukb-b-12064

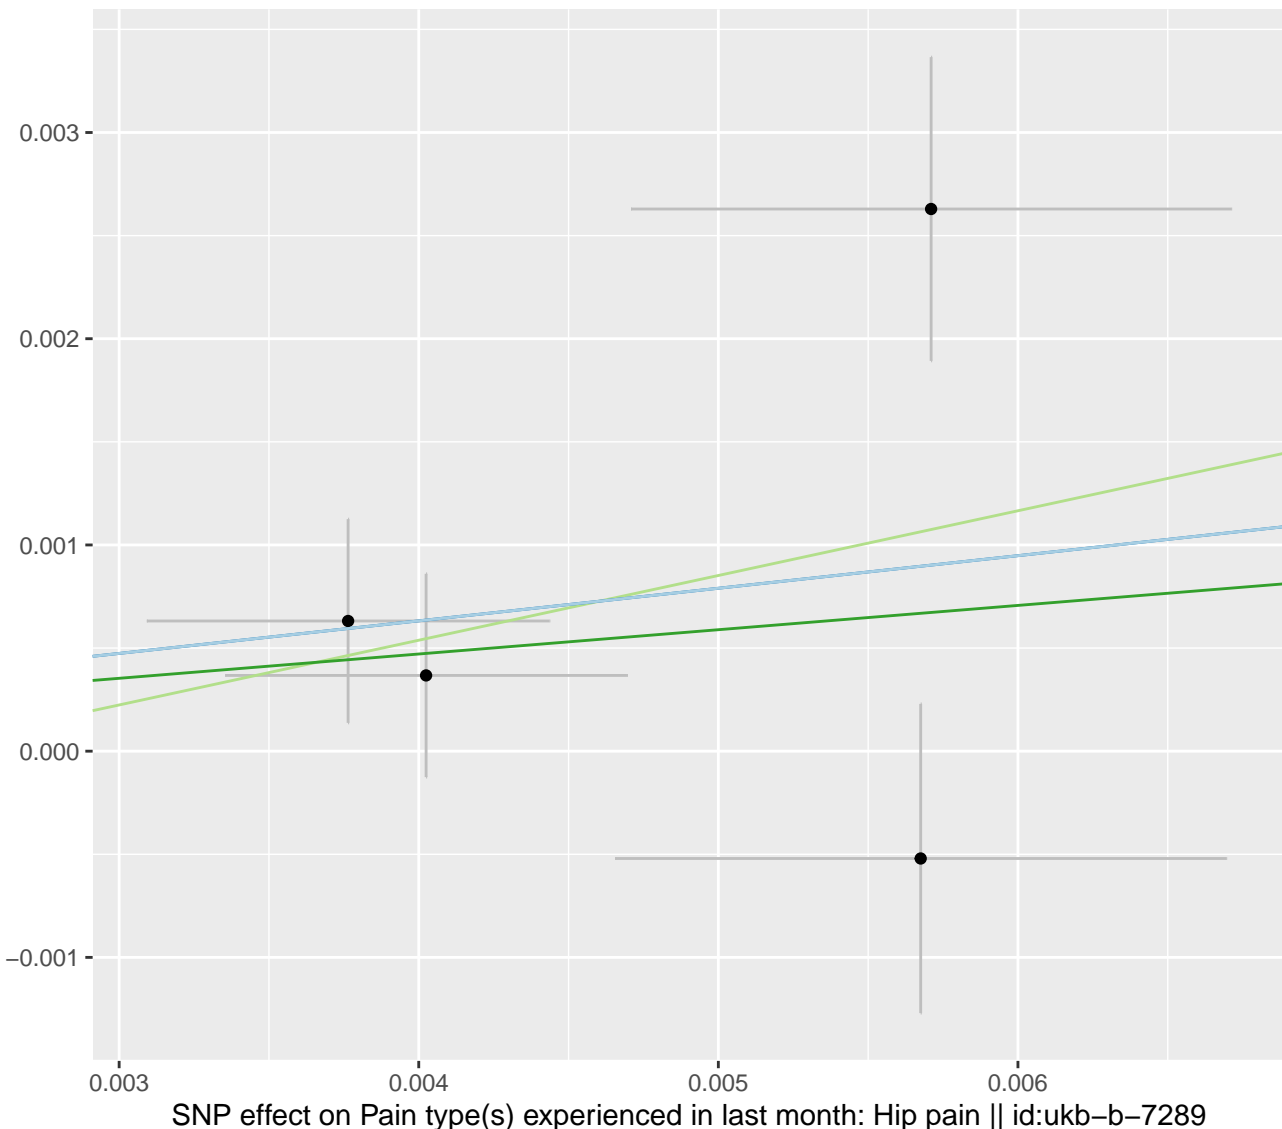

MR Test

Inverse variance weighted (fixed effects)

Inverse variance weighted (multiplicative random effects)

MR Egger

Weighted median

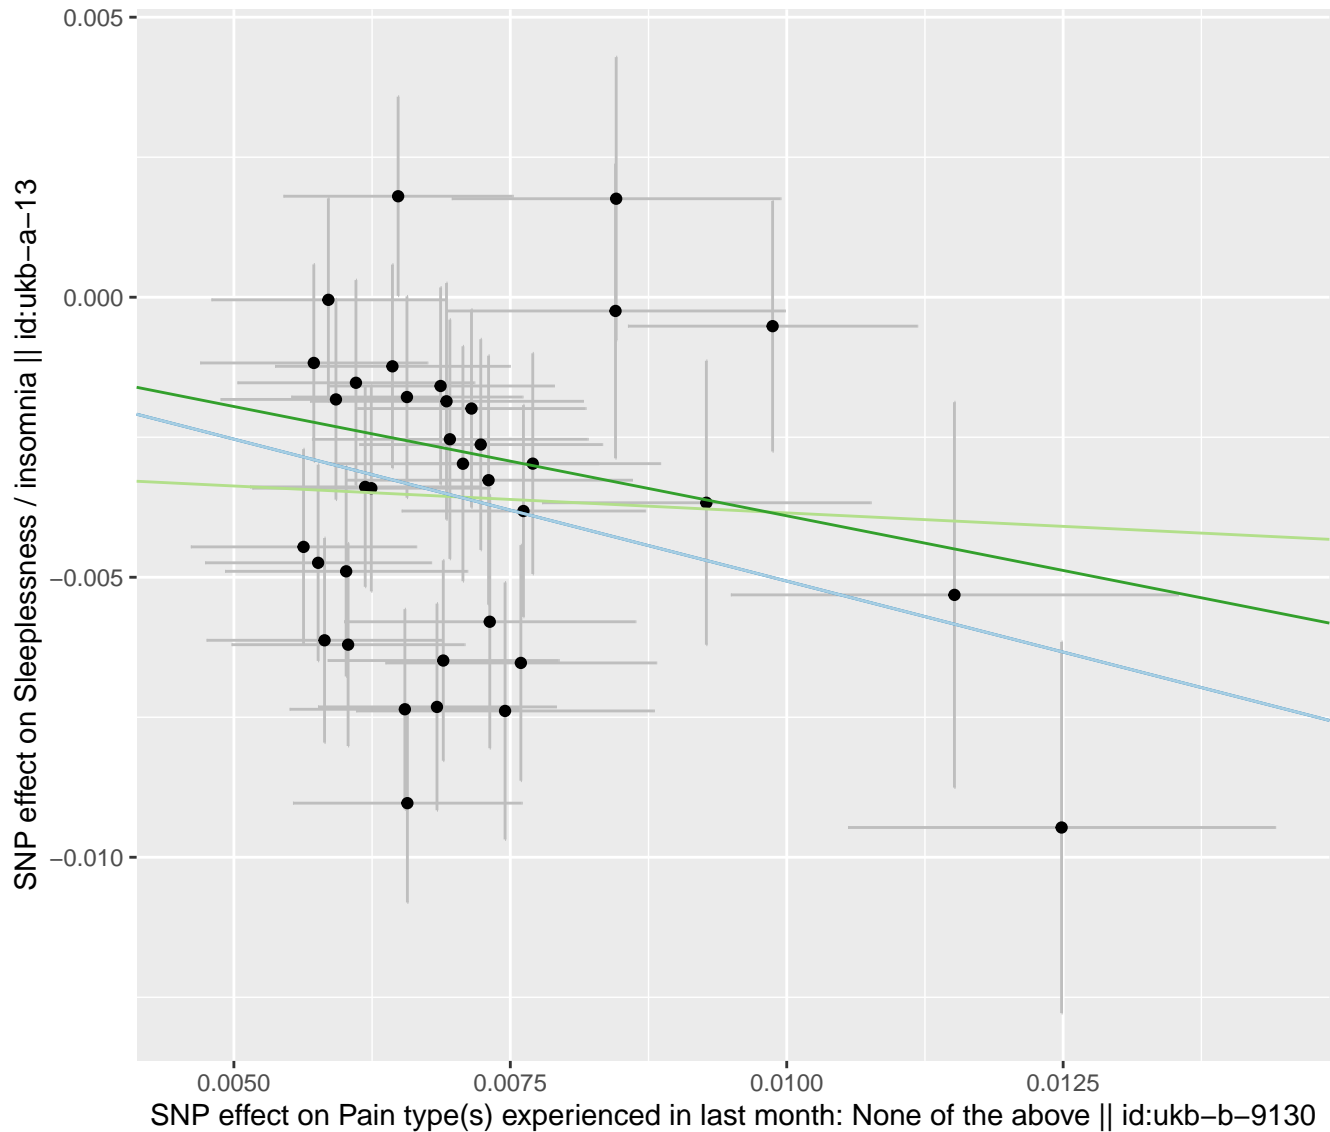

SNP effect on Non-cancer illness code self-reported: anxiety/panic attacks || id:ukb-a-82

MR Test

Inverse variance weighted (fixed effects)  
Inverse variance weighted (multiplicative random effects)

MR Egger  
Weighted median

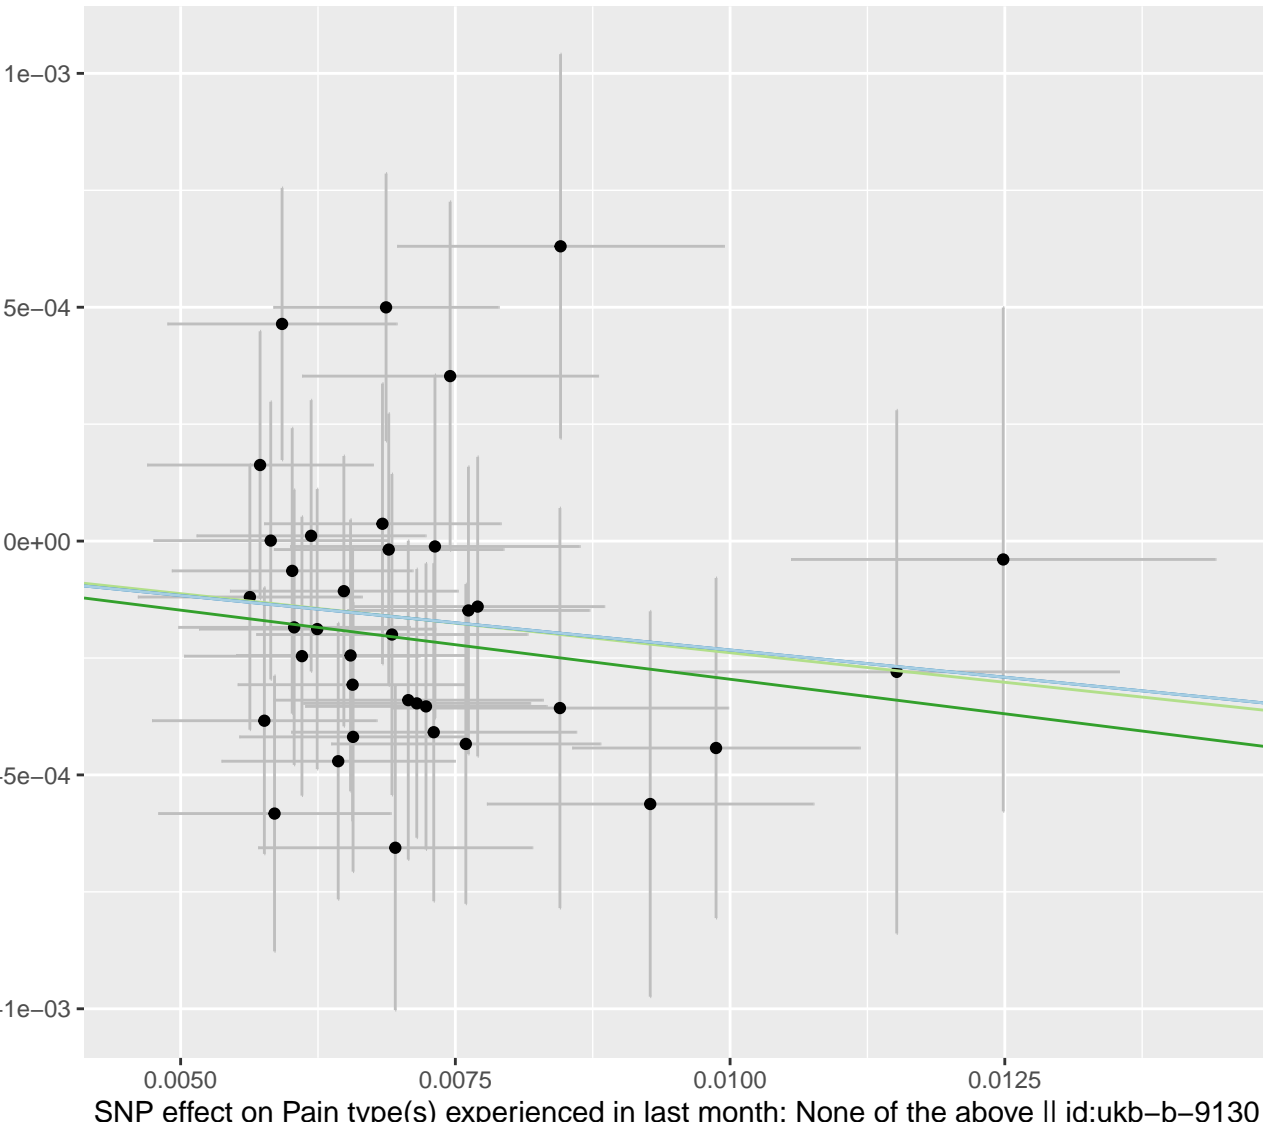



### MR Test

Inverse variance weighted (fixed effects)

Inverse variance weighted (multiplicative random effects)

MR Egger

Weighted median

SNP effect on Non-cancer illness code, self-reported: depression || id:ukb-b-12064

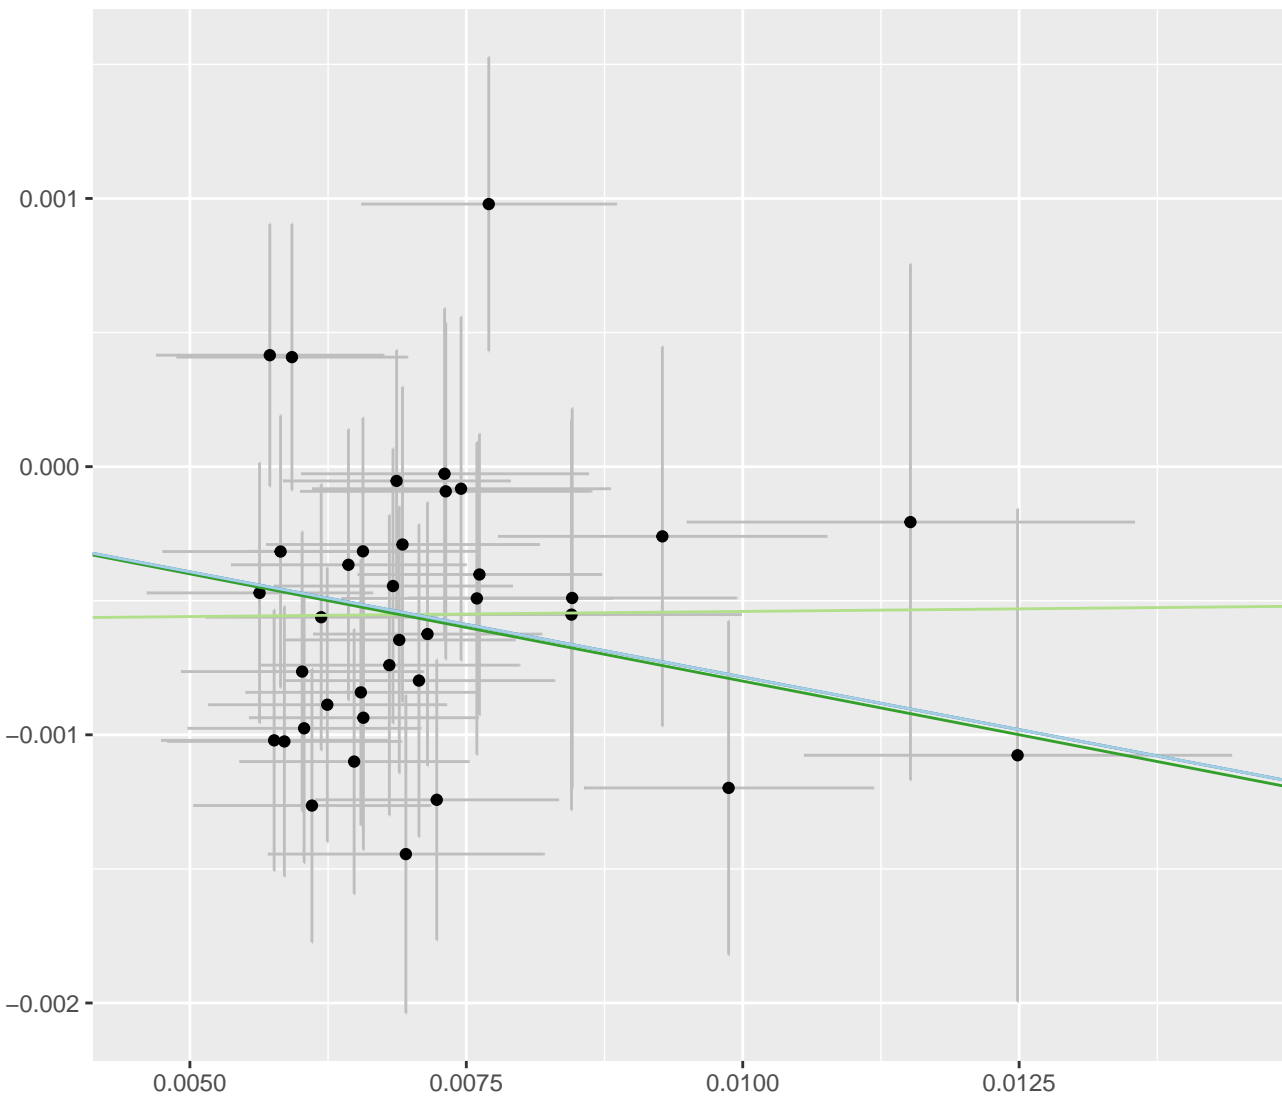

SNP effect on Pain type(s) experienced in last month: None of the above || id:ukb-b-9130

### MR Test

- Inverse variance weighted (fixed effects)
- Inverse variance weighted (multiplicative random effects)
- MR Egger
- Weighted median

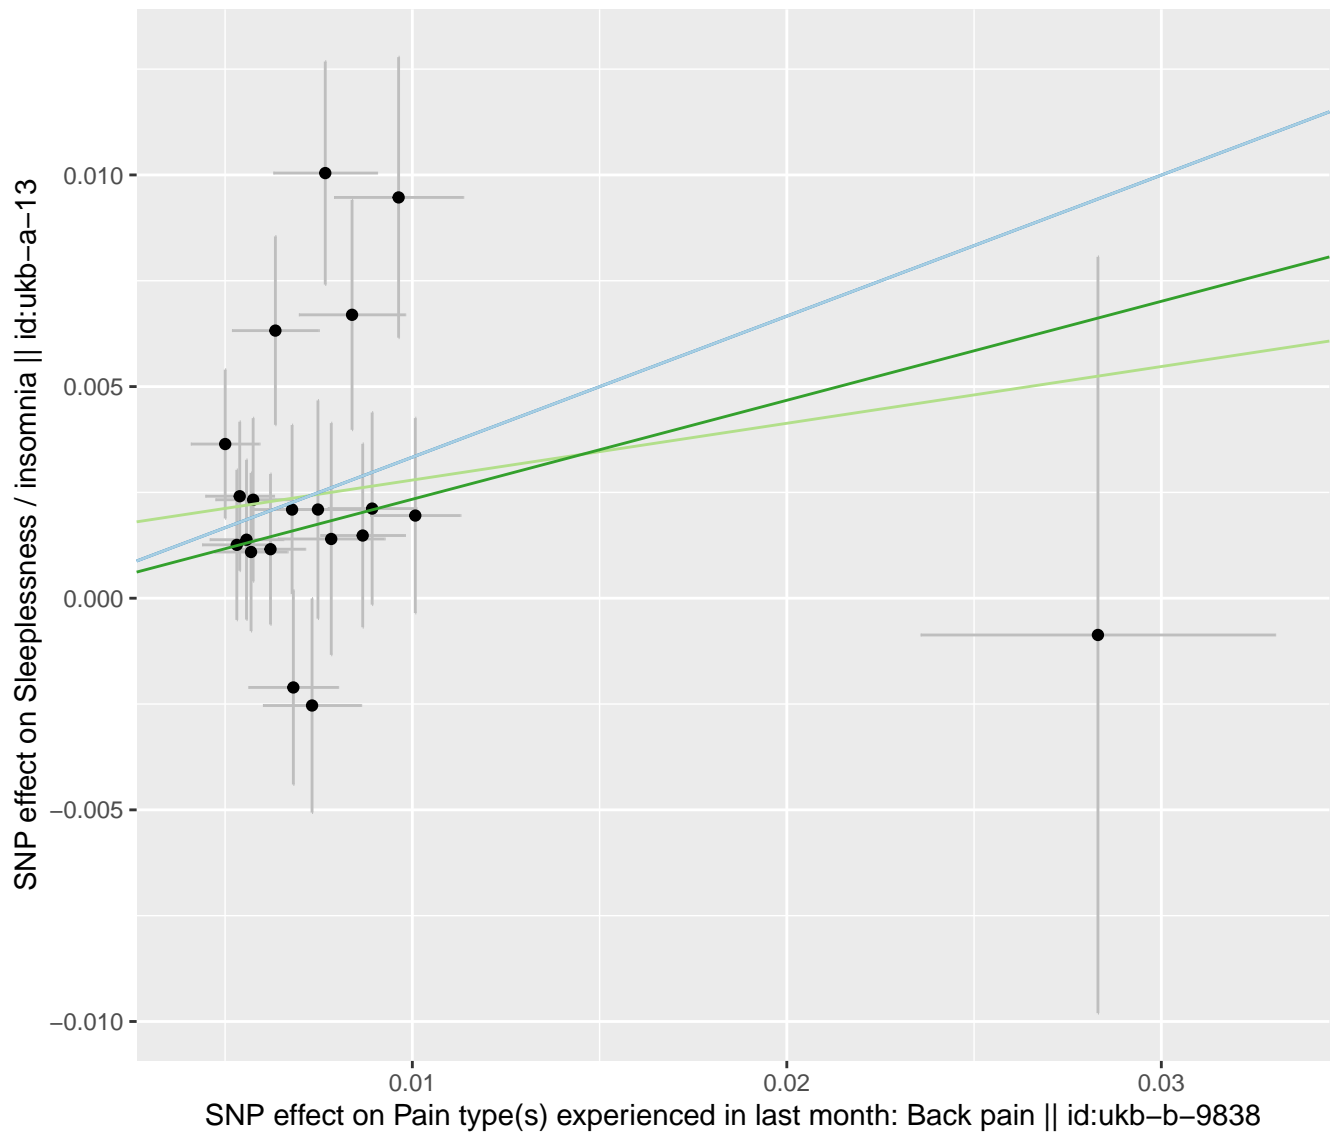

Supplement: 10194_2023_1612_MOESM3_ESM.pdf [file 10194_2023_1612_MOESM3_ESM.pdf]
