# Supplementary material for: Exploring the bidirectional relationship between pain and mental disorders: a comprehensive Mendelian randomization study
Source: PubMed Central journal article supplement (PMC10326936; doi:10.1186/s10194-023-01612-2), 2023-07-07

## **Supplementary file 4**

MR Results of sleeplessness/insomnia, anxiety/panic attacks and depression on the risk of localized pain with scatter plots

**Single-Variable MR Results of sleeplessness/insomnia, anxiety/panic attacks and depression on the risk of localized pain**

| Outcome                    | Method          | Sleeplessness / insomnia |                  |         | Anxiety/panic attacks* |                  |         | Depression* |                  |         |
|----------------------------|-----------------|--------------------------|------------------|---------|------------------------|------------------|---------|-------------|------------------|---------|
|                            |                 | N SNV                    | OR (95%CI)       | P value | N SNV                  | OR (95%CI)       | P value | N SNV       | OR (95%CI)       | P value |
| Headache                   | IVW (FEM)       | 27                       | 1.09 (1.06-1.12) | <0.001  | 12                     | 1.98 (1.41-2.78) | <0.001  | 32          | 1.28 (1.13-1.45) | <0.001  |
|                            | IVW (REM)       | 27                       | 1.09 (1.03-1.15) | 0.002   | 12                     | 1.98 (1.40-2.81) | <0.001  | 32          | 1.28 (1.08-1.52) | 0.004   |
|                            | Weighted median | 27                       | 1.07 (1.02-1.13) | 0.005   | 12                     | 2.31 (1.44-3.69) | <0.001  | 32          | 1.21 (1.00-1.46) | 0.05    |
|                            | MR Egger        | 27                       | 1.00 (0.84-1.19) | 0.99    | 12                     | 0.65 (0.28-1.55) | 0.36    | 32          | 1.58 (0.95-2.65) | 0.09    |
| Facial pain                | IVW (FEM)       | 26                       | 1.01 (1.00-1.02) | 0.02    | 8                      | 1.12 (0.97-1.28) | 0.12    | 25          | 1.07 (1.02-1.12) | 0.006   |
|                            | IVW (REM)       | 26                       | 1.01 (1.00-1.02) | 0.03    | 8                      | 1.12 (0.98-1.27) | 0.09    | 25          | 1.07 (1.03-1.11) | <0.001  |
|                            | Weighted median | 26                       | 1.01 (1.00-1.03) | 0.09    | 8                      | 1.11 (0.92-1.33) | 0.29    | 25          | 1.05 (0.99-1.12) | 0.12    |
|                            | MR Egger        | 26                       | 1.03 (0.99-1.07) | 0.13    | 8                      | 0.89 (0.49-1.60) | 0.70    | 25          | 1.28 (1.00-1.65) | 0.07    |
| Neck or shoulder pain      | IVW (FEM)       | 27                       | 1.12 (1.08-1.15) | <0.001  | 12                     | 1.83 (1.28-2.62) | <0.001  | 32          | 1.32 (1.16-1.50) | <0.001  |
|                            | IVW (REM)       | 27                       | 1.12 (1.07-1.16) | <0.001  | 12                     | 1.83 (1.28-2.62) | <0.001  | 32          | 1.32 (1.14-1.51) | <0.001  |
|                            | Weighted median | 27                       | 1.07 (1.02-1.12) | 0.005   | 12                     | 1.78 (1.08-2.93) | 0.25    | 32          | 1.25 (1.04-1.50) | 0.02    |
|                            | MR Egger        | 27                       | 1.05 (0.93-1.18) | 0.42    | 12                     | 1.34 (0.53-3.42) | 0.55    | 32          | 1.52 (0.99-2.31) | 0.06    |
| Back pain                  | IVW (FEM)       | 27                       | 1.12 (1.09-1.16) | <0.001  | 12                     | 1.54 (1.20-1.97) | 0.02    | 32          | 1.35 (1.18-1.55) | <0.001  |
|                            | IVW (REM)       | 27                       | 1.12 (1.07-1.18) | <0.001  | 12                     | 1.54 (1.06-2.23) | <0.001  | 32          | 1.35 (1.10-1.66) | 0.004   |
|                            | Weighted median | 27                       | 1.11 (1.05-1.17) | <0.001  | 12                     | 1.64 (1.01-2.68) | 0.05    | 32          | 1.30 (1.04-1.62) | 0.02    |
|                            | MR Egger        | 27                       | 1.14 (0.97-1.33) | 0.13    | 12                     | 1.23 (0.48-3.16) | 0.68    | 32          | 1.75 (0.94-3.32) | 0.09    |
| Stomach and abdominal pain | IVW (FEM)       | 27                       | 1.06 (1.04-1.08) | <0.001  | 12                     | 0.97 (0.76-1.23) | 0.80    | 32          | 1.14 (1.05-1.25) | 0.002   |
|                            | IVW (REM)       | 27                       | 1.06 (1.03-1.08) | <0.001  | 12                     | 0.97 (0.78-1.20) | 0.78    | 32          | 1.14 (1.04-1.25) | 0.004   |
|                            | Weighted median | 27                       | 1.04 (1.01-1.07) | 0.006   | 12                     | 1.05 (0.76-1.45) | 0.77    | 32          | 1.16 (1.03-1.32) | 0.02    |
|                            | MR Egger        | 27                       | 1.01 (0.97-1.07) | 0.76    | 12                     | 1.27 (0.69-2.32) | 0.46    | 32          | 0.95 (0.73-1.25) | 0.74    |
| Hip pain                   | IVW (FEM)       | 27                       | 1.08 (1.05-1.10) | <0.001  | 12                     | 1.20 (0.91-1.57) | 0.19    | 32          | 1.17 (1.06-1.29) | 0.002   |
|                            | IVW (REM)       | 27                       | 1.08 (1.05-1.11) | <0.001  | 12                     | 1.20 (0.80-1.80) | 0.39    | 32          | 1.17 (1.04-1.31) | 0.01    |
|                            | Weighted median | 27                       | 1.07 (1.03-1.10) | <0.001  | 12                     | 1.26 (0.83-1.92) | 0.27    | 32          | 1.14 (0.98-1.31) | 0.08    |
|                            | MR Egger        | 27                       | 1.05 (0.96-1.15) | 0.31    | 12                     | 0.67 (0.24-1.85) | 0.46    | 32          | 0.98 (0.68-1.40) | 0.90    |
| Knee pain                  | IVW (FEM)       | 27                       | 1.09 (1.06-1.12) | <0.001  | 12                     | 1.14 (0.80-1.62) | 0.46    | 32          | 1.16 (1.02-1.32) | 0.02    |
|                            | IVW (REM)       | 27                       | 1.09 (1.04-1.13) | <0.001  | 12                     | 1.14 (0.78-1.66) | 0.49    | 32          | 1.16 (0.99-1.36) | 0.06    |
|                            | Weighted median | 27                       | 1.05 (1.00-1.10) | 0.06    | 12                     | 1.23 (0.76-1.98) | 0.40    | 32          | 1.20 (0.99-1.46) | 0.06    |
|                            | MR Egger        | 27                       | 0.98 (0.87-1.11) | 0.78    | 12                     | 0.65 (0.26-1.66) | 0.39    | 32          | 1.00 (0.62-1.60) | 1.00    |
| None of above              | IVW (FEM)       | 27                       | 0.86 (0.83-0.89) | <0.001  | 12                     | 0.55 (0.37-0.84) | 0.005   | 32          | 0.71 (0.61-0.83) | <0.001  |
|                            | IVW (REM)       | 27                       | 0.86 (0.81-0.92) | <0.001  | 12                     | 0.55 (0.36-0.86) | 0.008   | 32          | 0.71 (0.58-0.87) | <0.001  |
|                            | Weighted median | 27                       | 0.92 (0.86-0.97) | 0.004   | 12                     | 0.44 (0.25-0.77) | 0.004   | 32          | 0.68 (0.54-0.85) | <0.001  |
|                            | MR Egger        | 27                       | 0.93 (0.77-1.13) | 0.49    | 12                     | 1.83 (0.64-5.28) | 0.29    | 32          | 0.64 (0.35-1.18) | 0.16    |

Abbreviations: N SNV, number of single-nucleotide variants; IVW, inverse-variance weighted; FEM, fixed effects models; REM, random effects models; OR, odds ratio; GWAS, genome-wide association studies.

Genetic instruments selected from sleeplessness/insomnia, anxiety/panic attacks and depression GWASs, selection threshold  $P$  less than  $5 \times 10^{-8}$ , pruned at linkage disequilibrium  $R^2$  less than 0.001 (10 000 kilobase pair window).

\* If the number of SNPs available for analysis is less than 3, the selection threshold  $P$  will be adjusted to  $5 \times 10^{-6}$ .

### MR Test

Inverse variance weighted (fixed effects)

Inverse variance weighted (multiplicative random effects)

MR Egger

Weighted median

SNP effect on Pain type(s) experienced in last month: Hip pain || id:ukb-b-7289

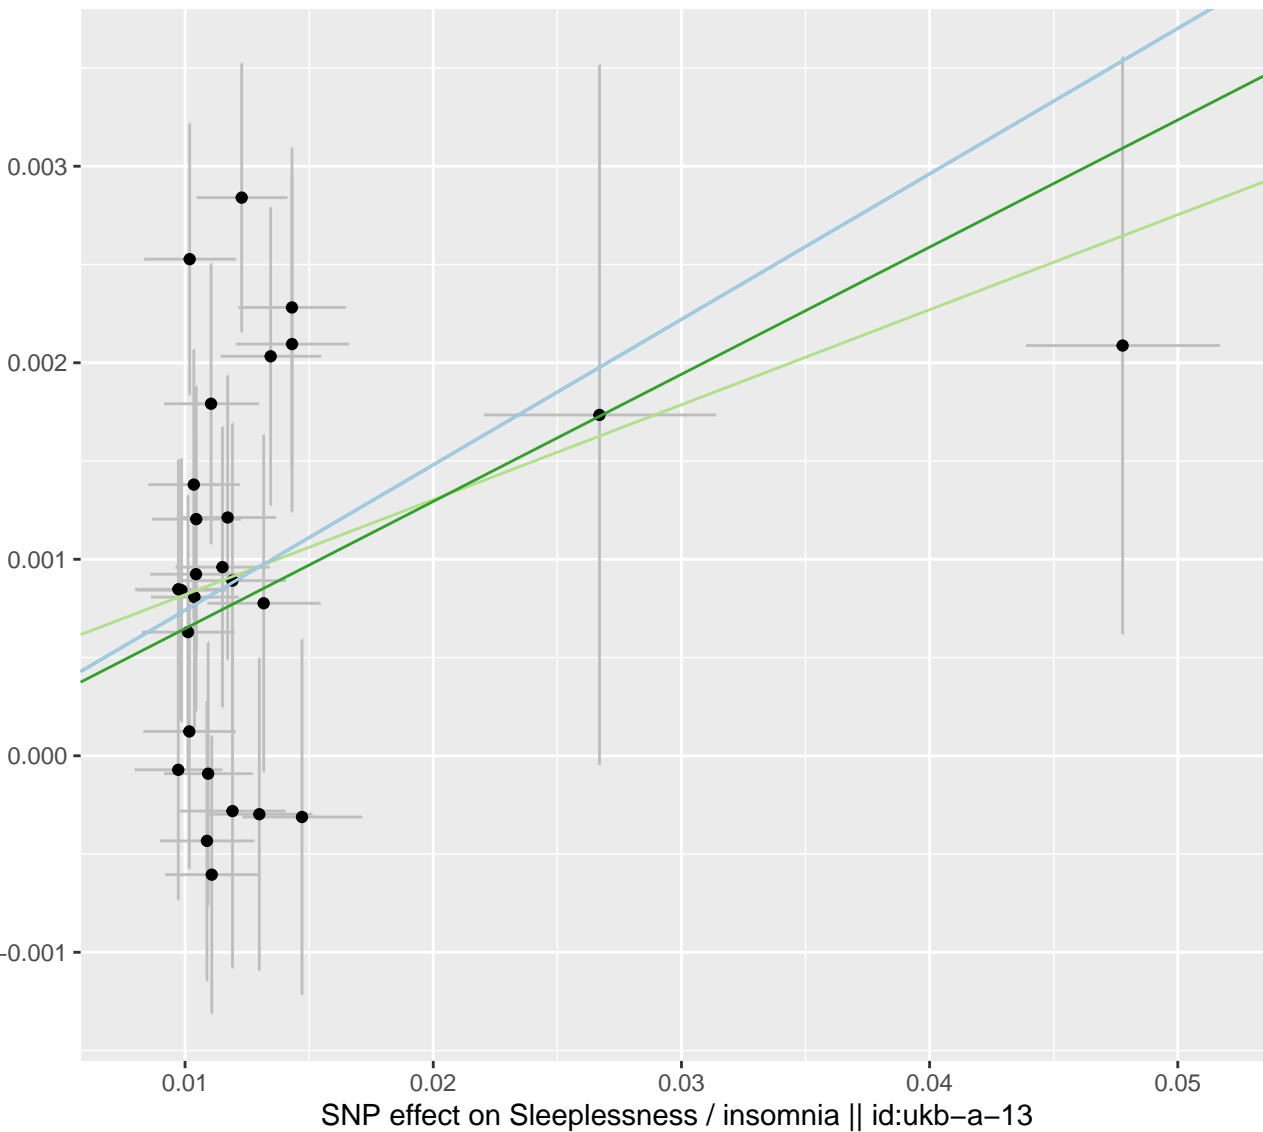

MR Test

Inverse variance weighted (fixed effects)

Inverse variance weighted (multiplicative random effects)

MR Egger

Weighted median

SNP effect on Pain type(s) experienced in last month: None of the above || id:ukb-b-9130

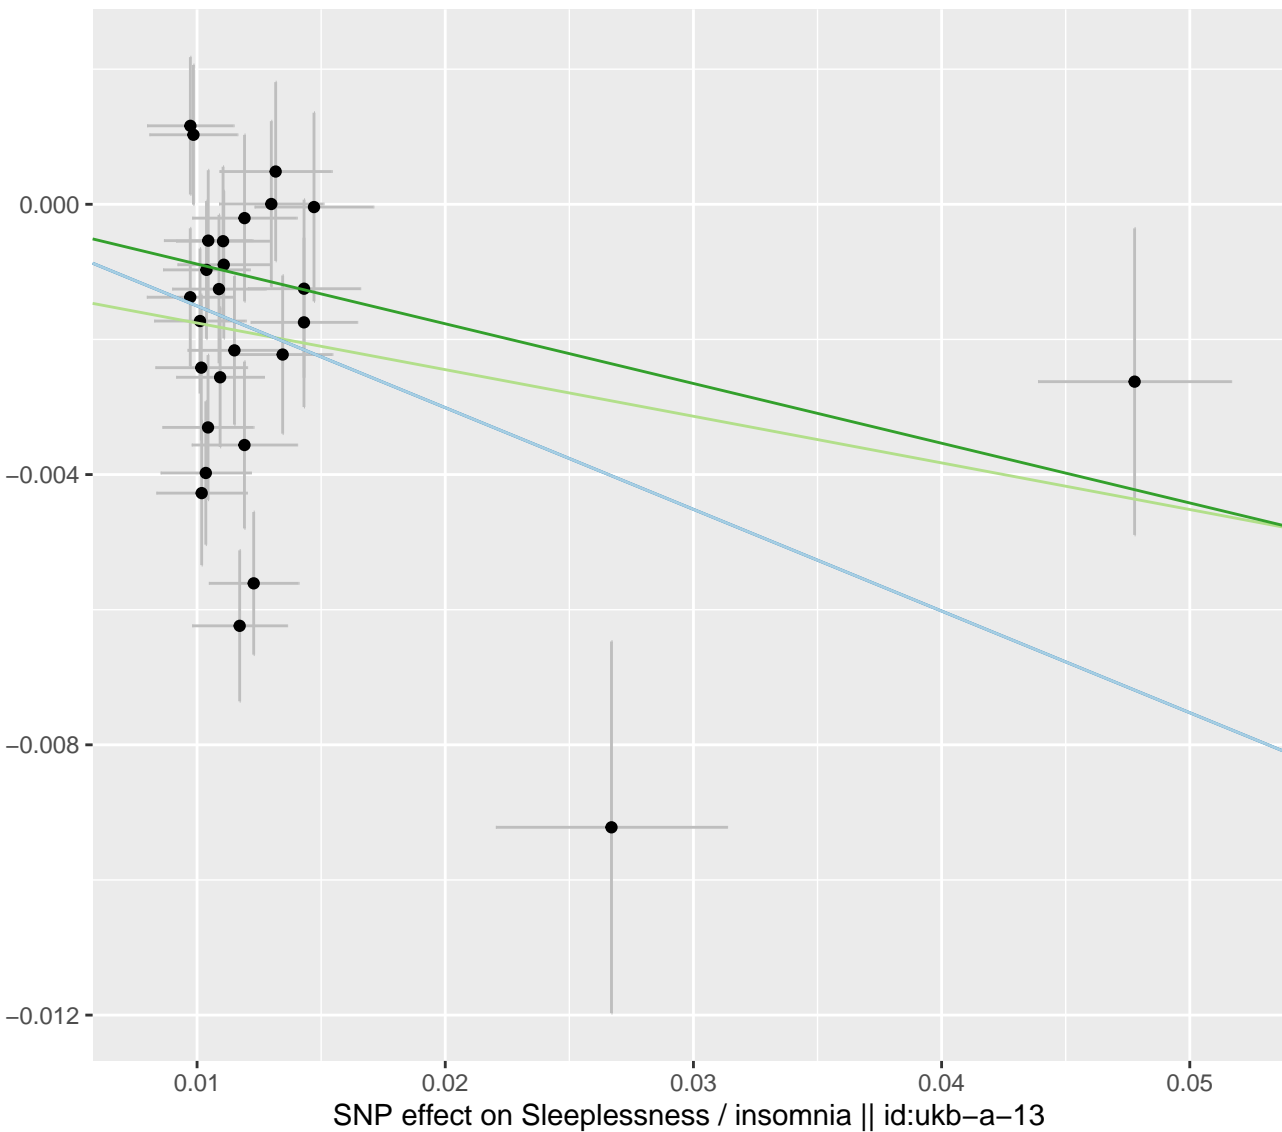

MR Test

Inverse variance weighted (fixed effects)

Inverse variance weighted (multiplicative random effects)

MR Egger

Weighted median

SNP effect on Pain type(s) experienced in last month: Back pain || id:ukb-b-9838

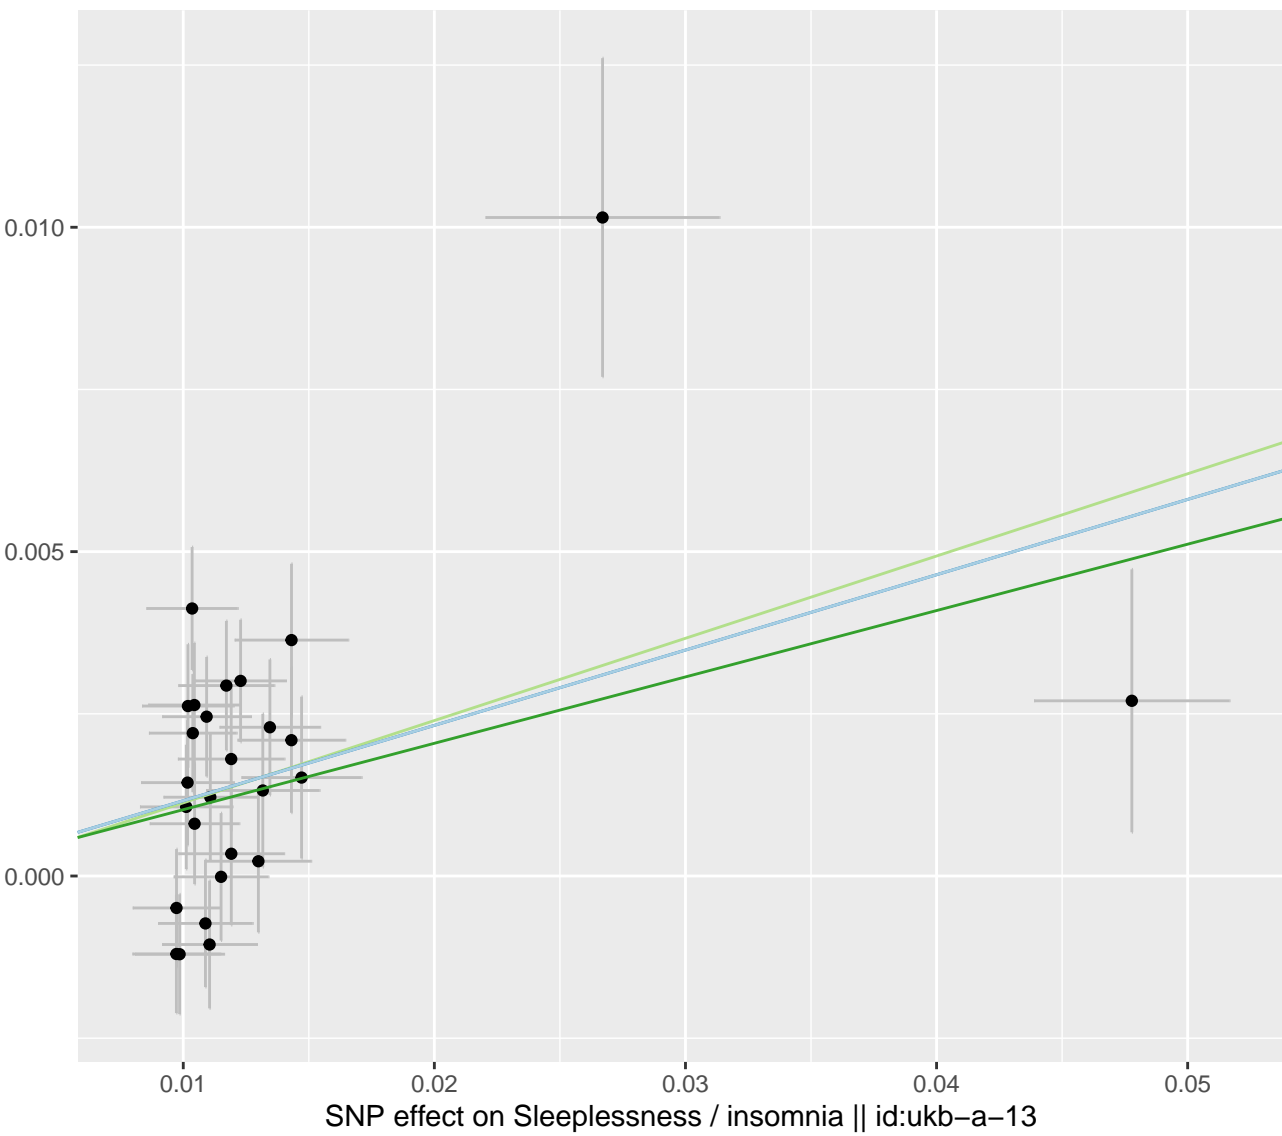

P effect on Pain type(s) experienced in last month: Stomach or abdominal pain || id:ukb-b-11413

### MR Test

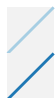

Inverse variance weighted (fixed effects)

Inverse variance weighted (multiplicative random effects)

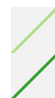

MR Egger

Weighted median

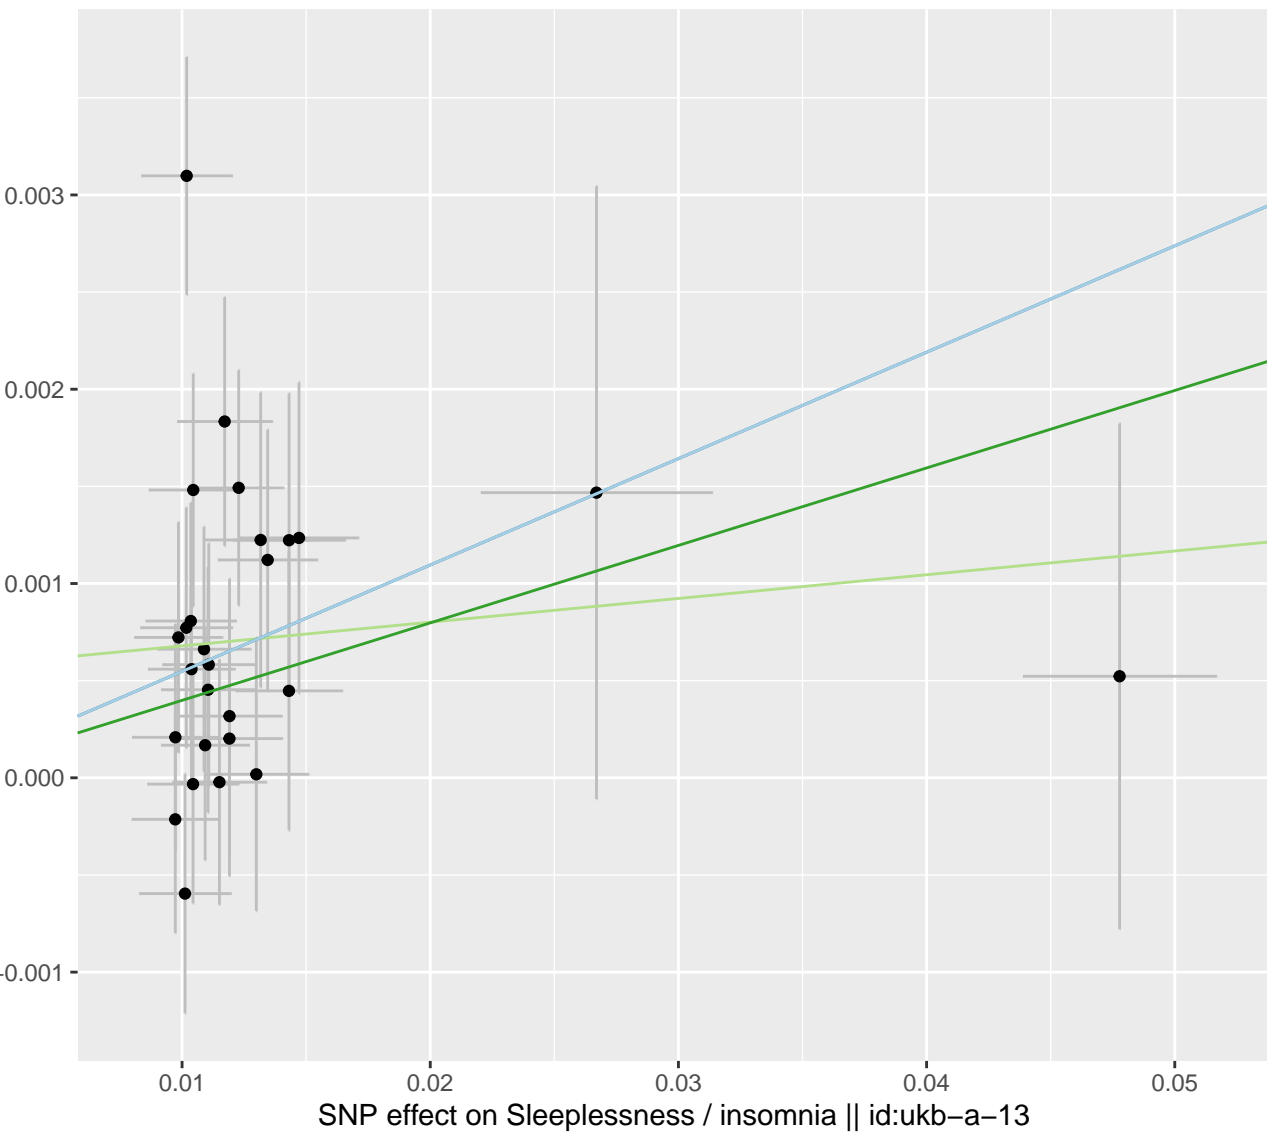

MR Test

Inverse variance weighted (fixed effects)

Inverse variance weighted (multiplicative random effects)

MR Egger

Weighted median

SNP effect on Pain type(s) experienced in last month: Headache || id:ukb-b-12181

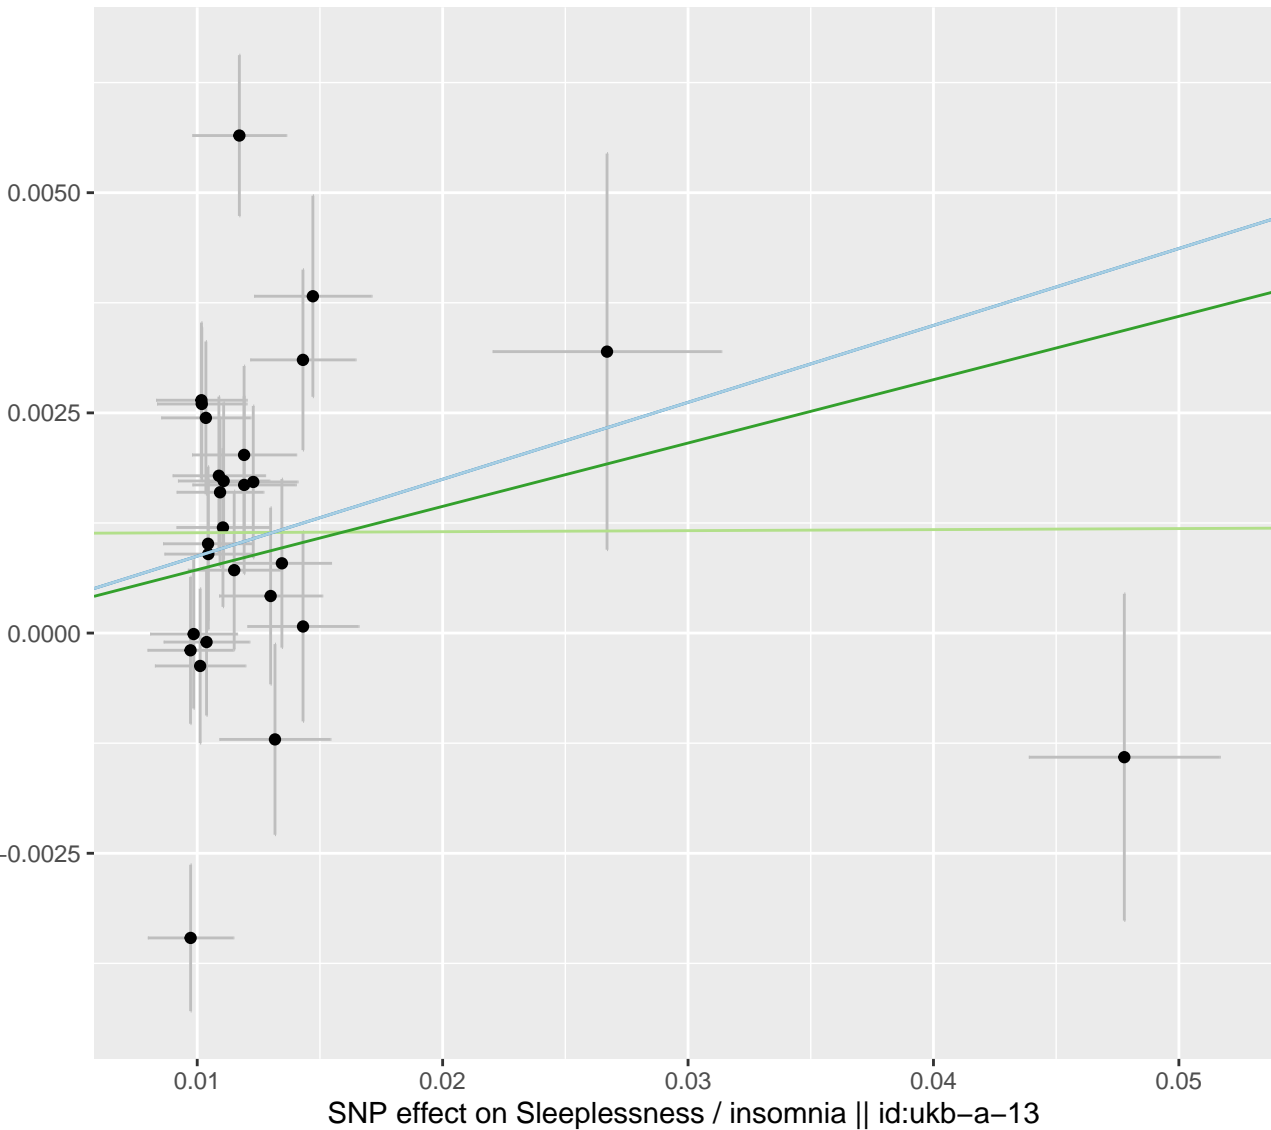

MR Test

- Inverse variance weighted (fixed effects)
- Inverse variance weighted (multiplicative random effects)

- MR Egger
- Weighted median

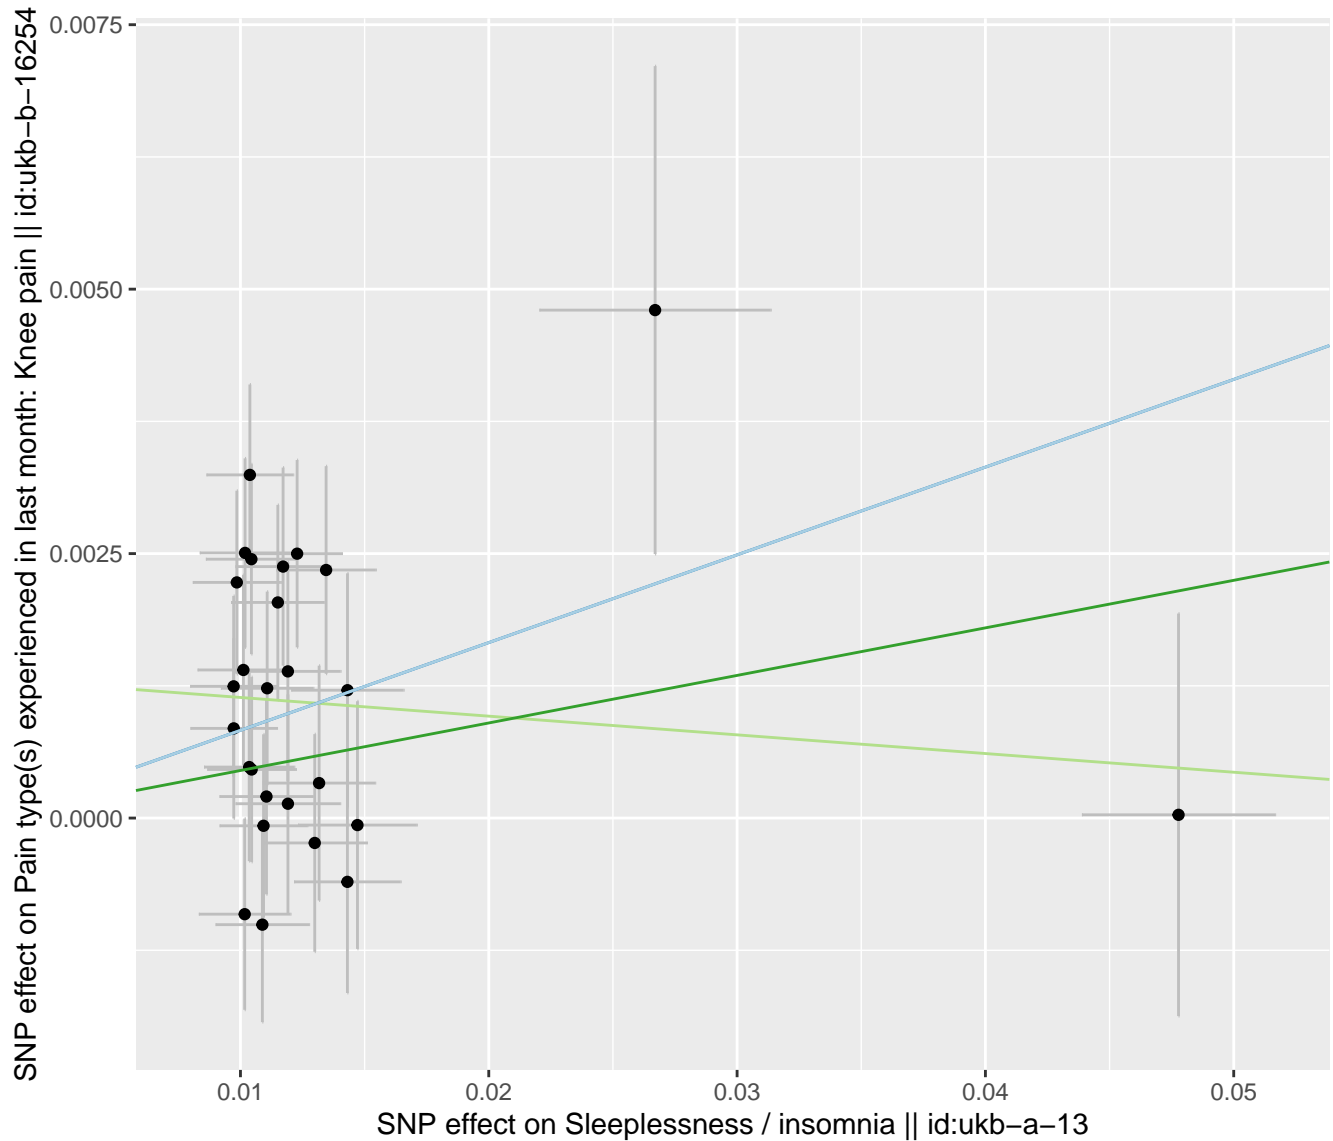



MR Test

Inverse variance weighted (fixed effects)

Inverse variance weighted (multiplicative random effects)

MR Egger

Weighted median

SNP effect on Pain type(s) experienced in last month: Facial pain || id:ukb-b-17107

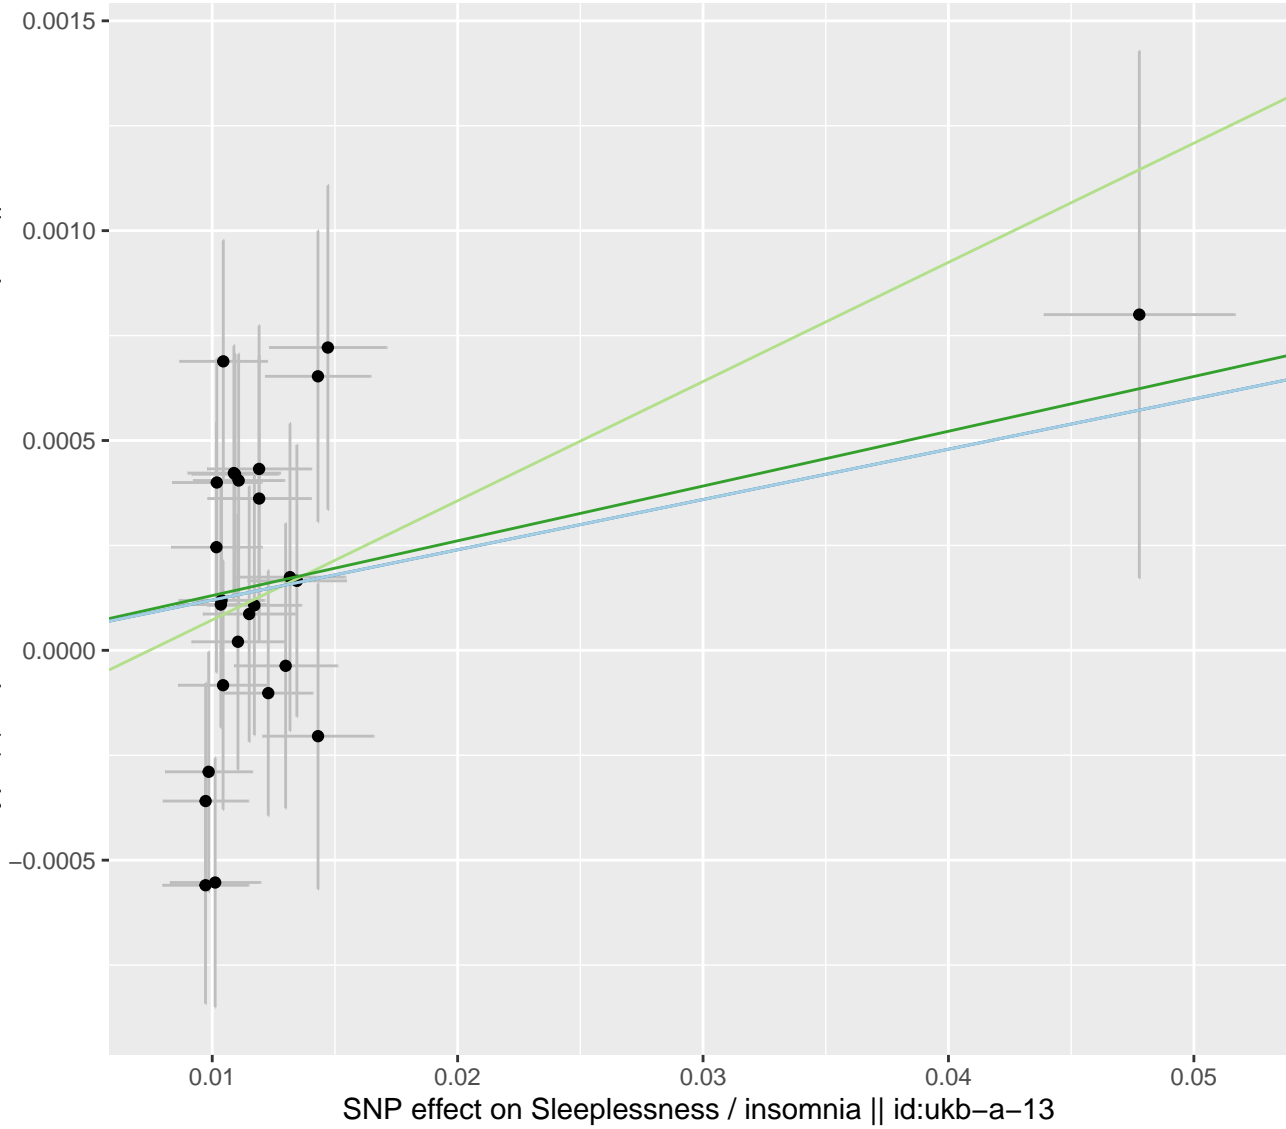

SNP effect on Pain type(s) experienced in last month: Neck or shoulder pain || id:ukb-b-18596

MR Test

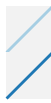

Inverse variance weighted (fixed effects)

Inverse variance weighted (multiplicative random effects)

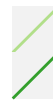

MR Egger

Weighted median

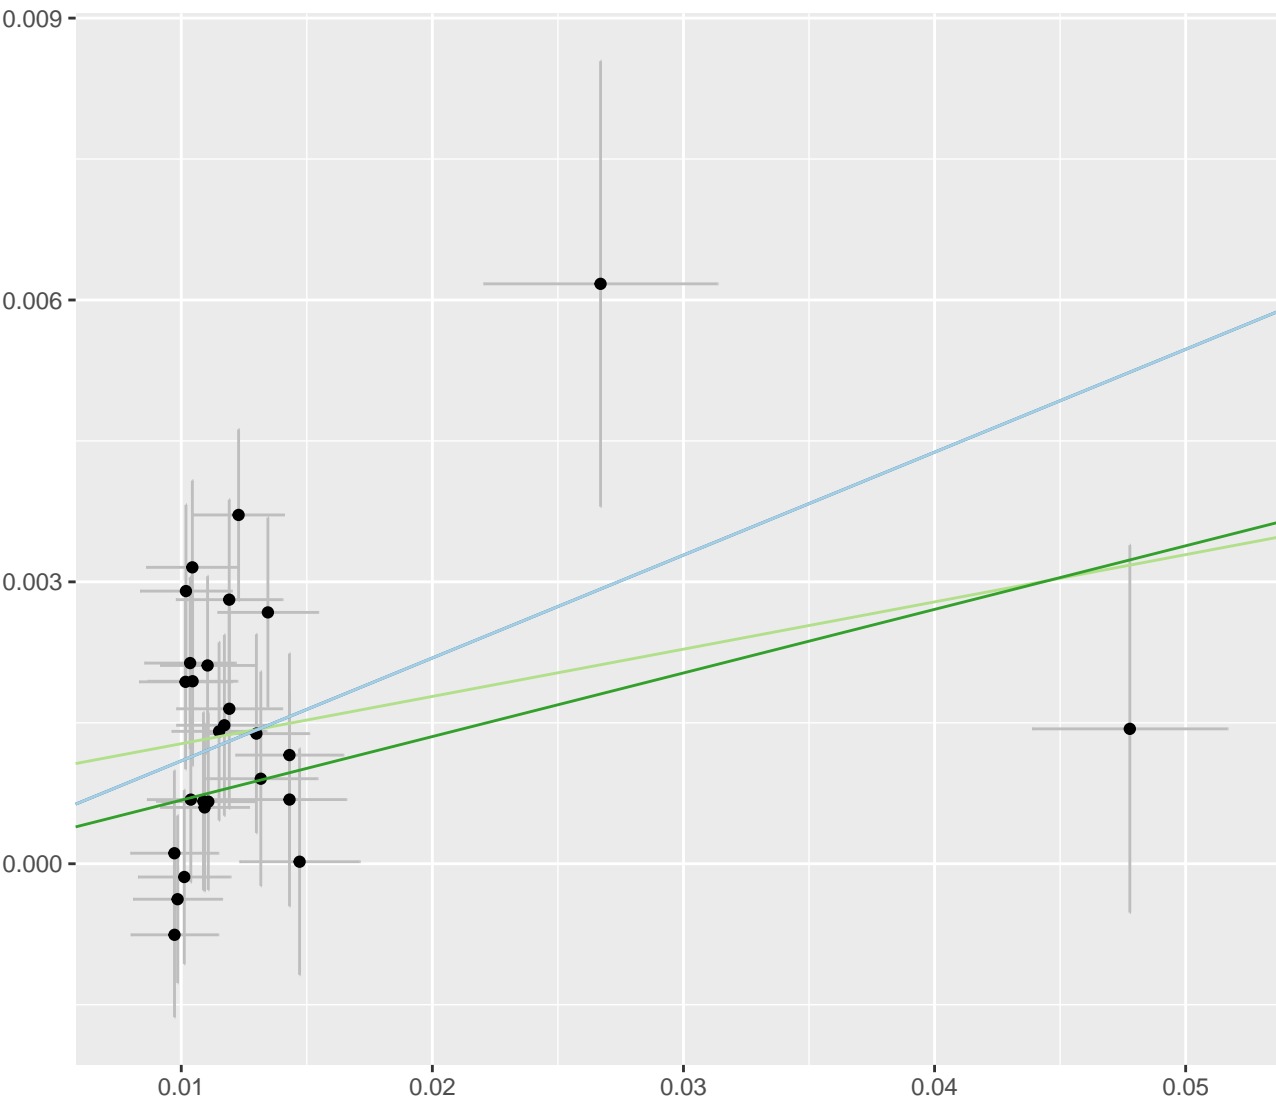

SNP effect on Sleeplessness / insomnia || id:ukb-a-13

MR Test

- Inverse variance weighted (fixed effects)
- Inverse variance weighted (multiplicative random effects)

- MR Egger
- Weighted median

SNP effect on Pain type(s) experienced in last month: Hip pain || id:ukb-b-7289

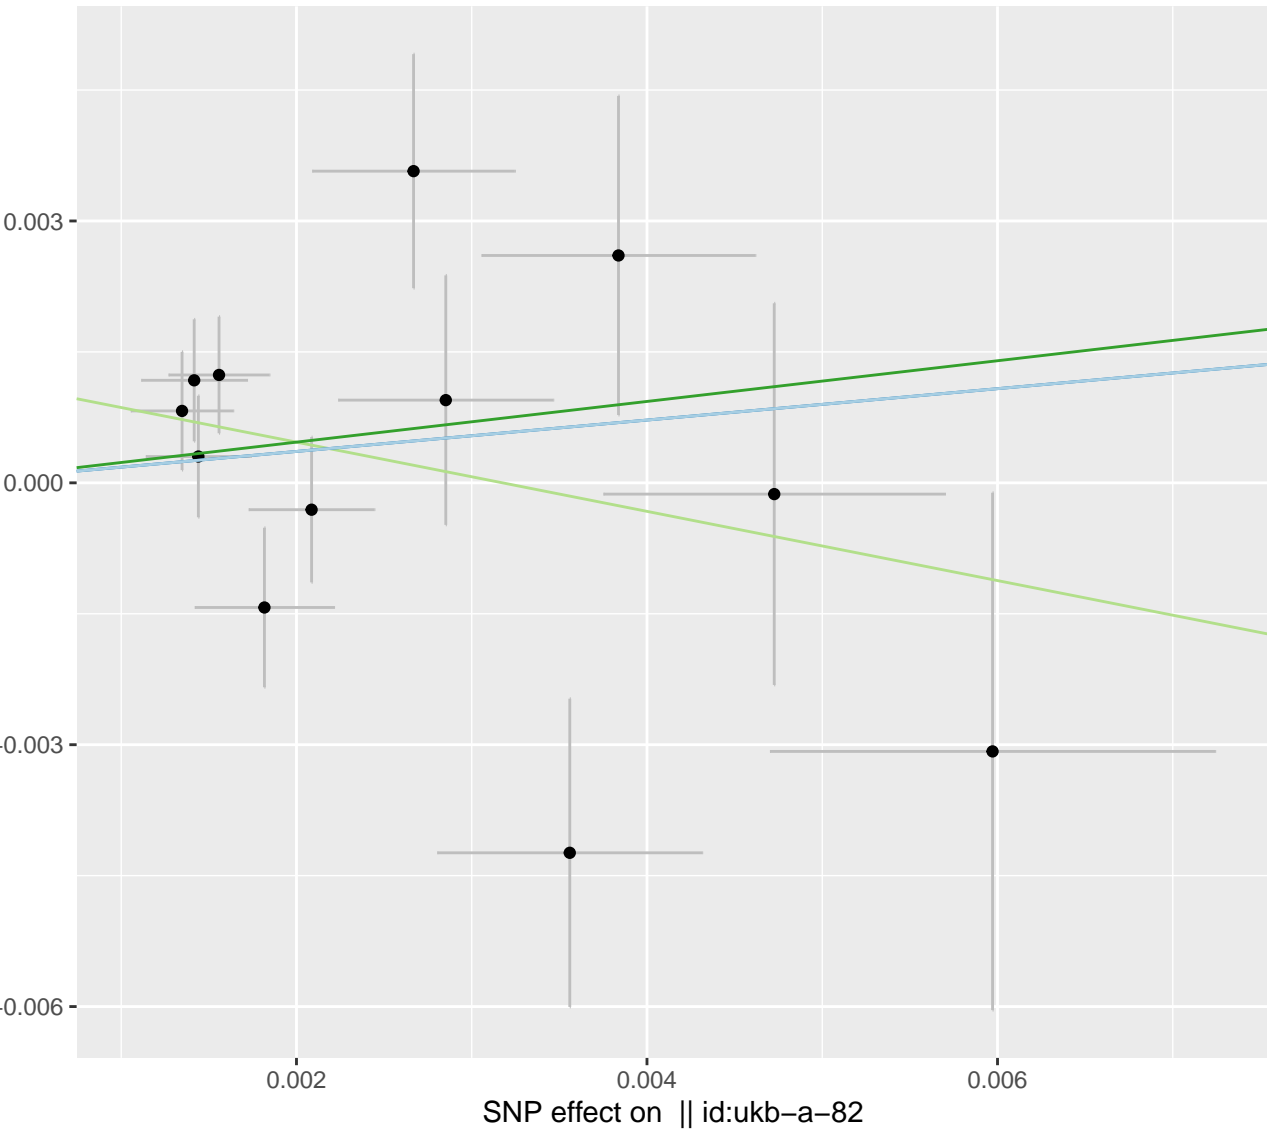

MR Test

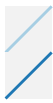

Inverse variance weighted (fixed effects)

Inverse variance weighted (multiplicative random effects)

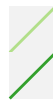

MR Egger

Weighted median

SNP effect on Pain type(s) experienced in last month: None of the above || id:ukb-b-9130

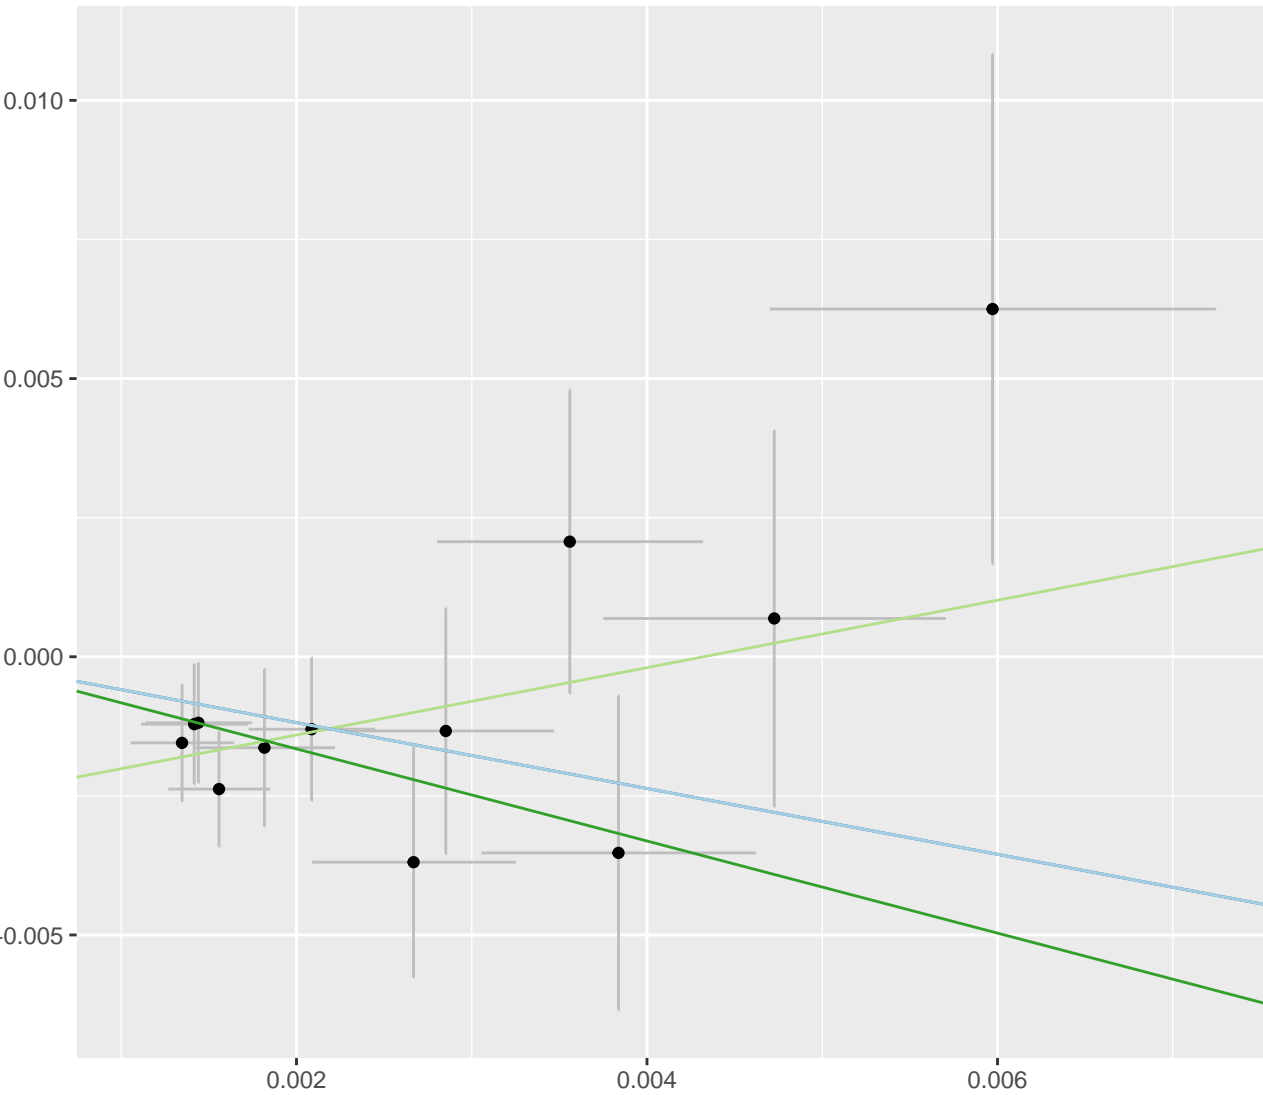

SNP effect on || id:ukb-a-82

### MR Test

Inverse variance weighted (fixed effects)  
Inverse variance weighted (multiplicative random effects)

MR Egger  
Weighted median

SNP effect on Pain type(s) experienced in last month: Back pain || id:ukb-b-9838

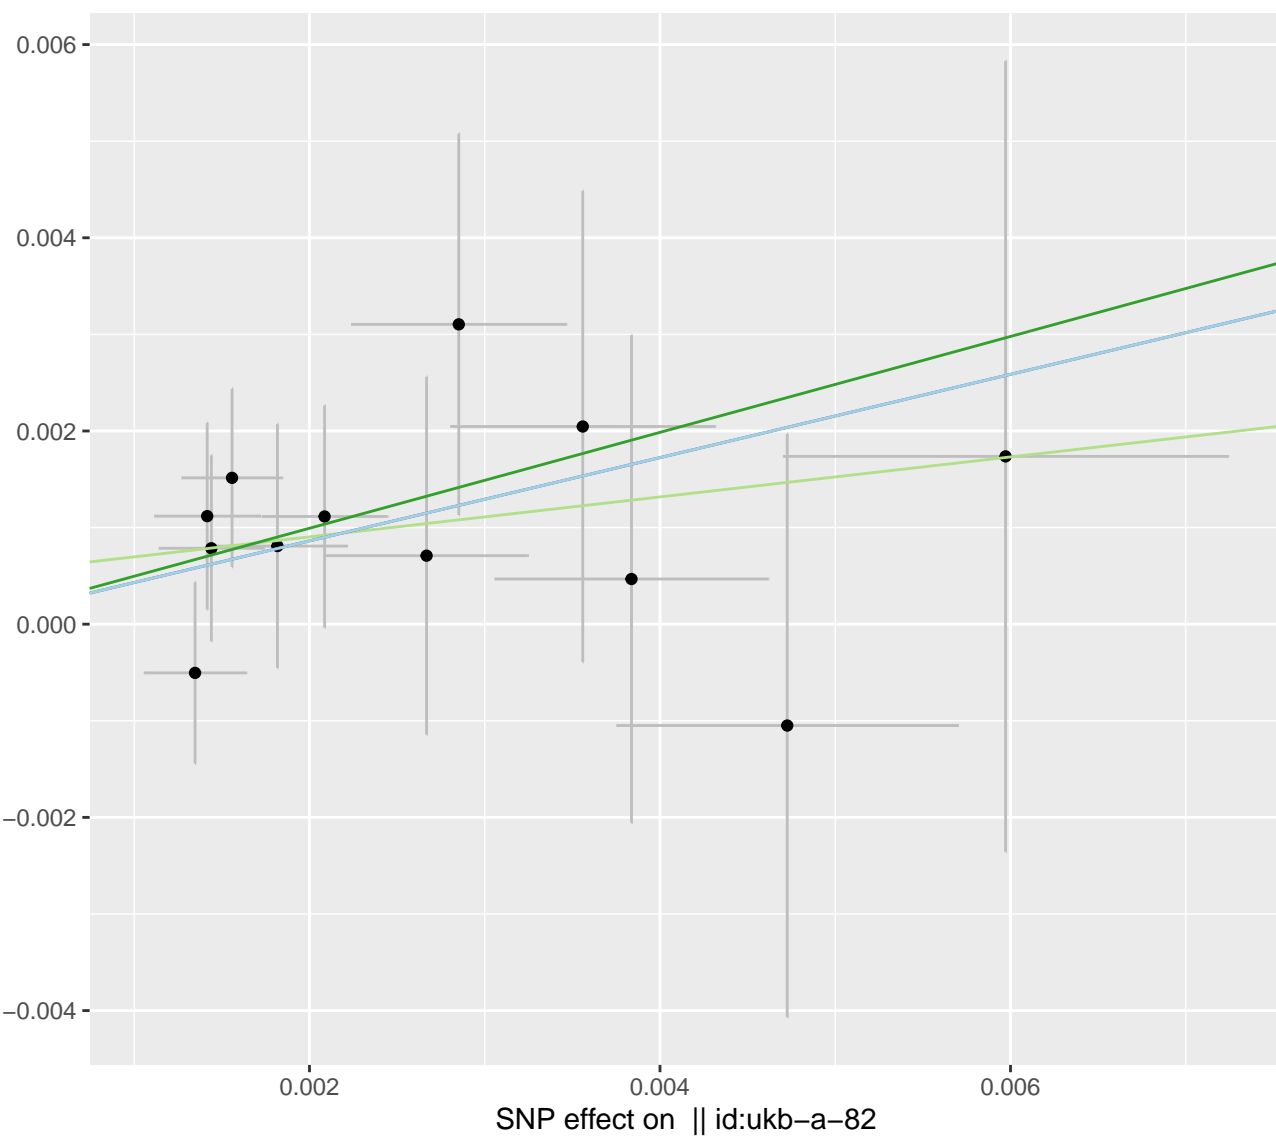

P effect on Pain type(s) experienced in last month: Stomach or abdominal pain || id:ukb-b-11413

### MR Test

Inverse variance weighted (fixed effects)  
Inverse variance weighted (multiplicative random effects)

MR Egger  
Weighted median

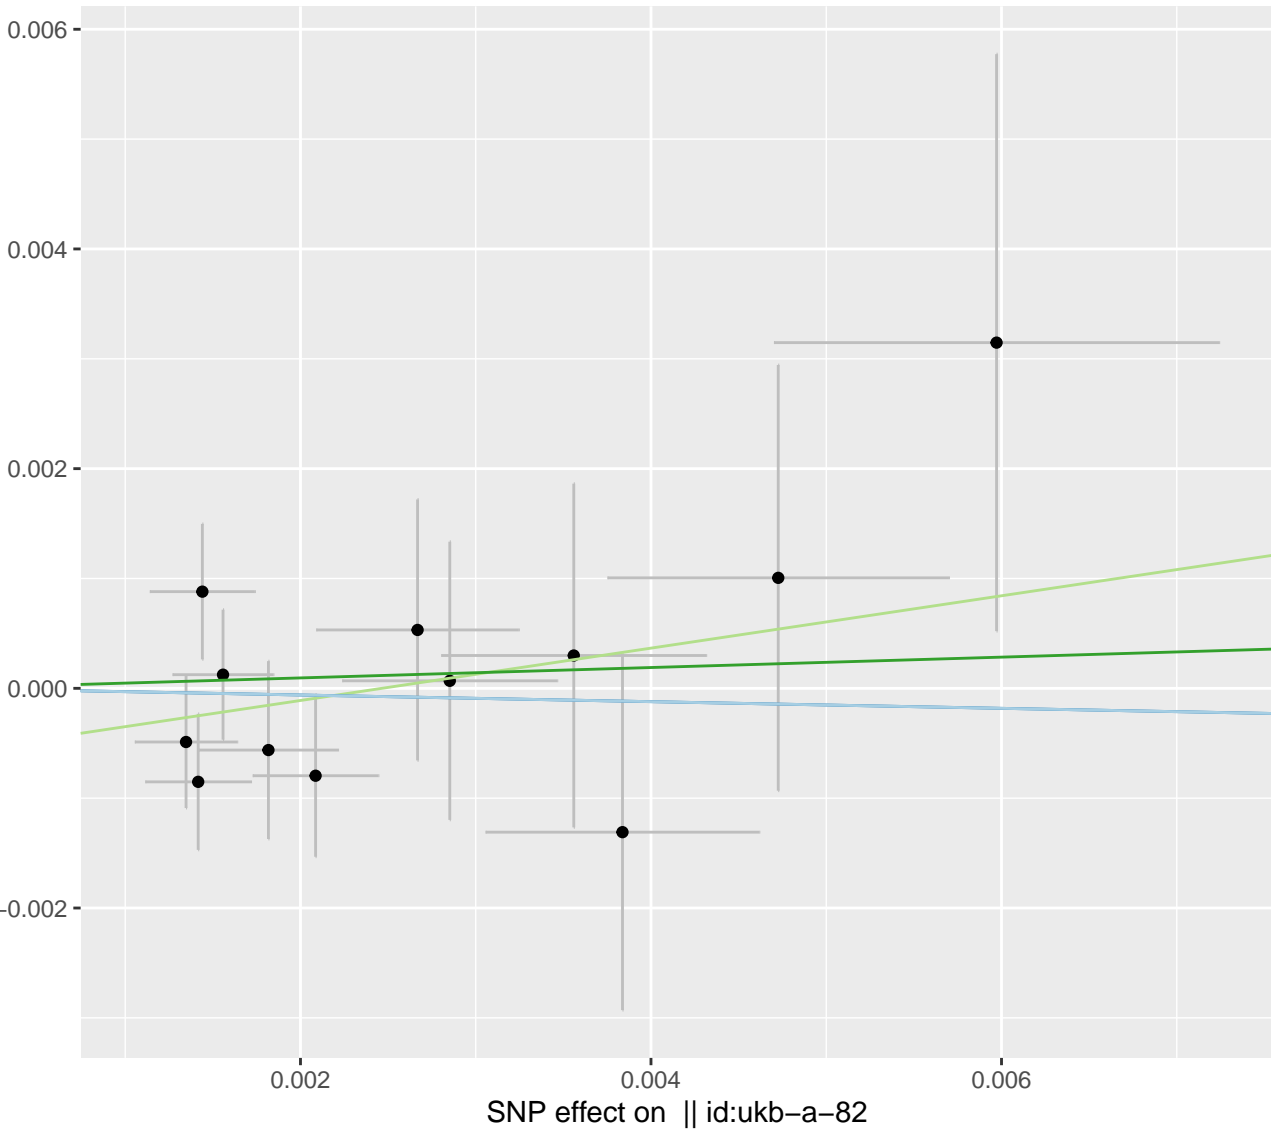

MR Test

- Inverse variance weighted (fixed effects)
- Inverse variance weighted (multiplicative random effects)

- MR Egger
- Weighted median

SNP effect on Pain type(s) experienced in last month: Headache || id:ukb-b-12181

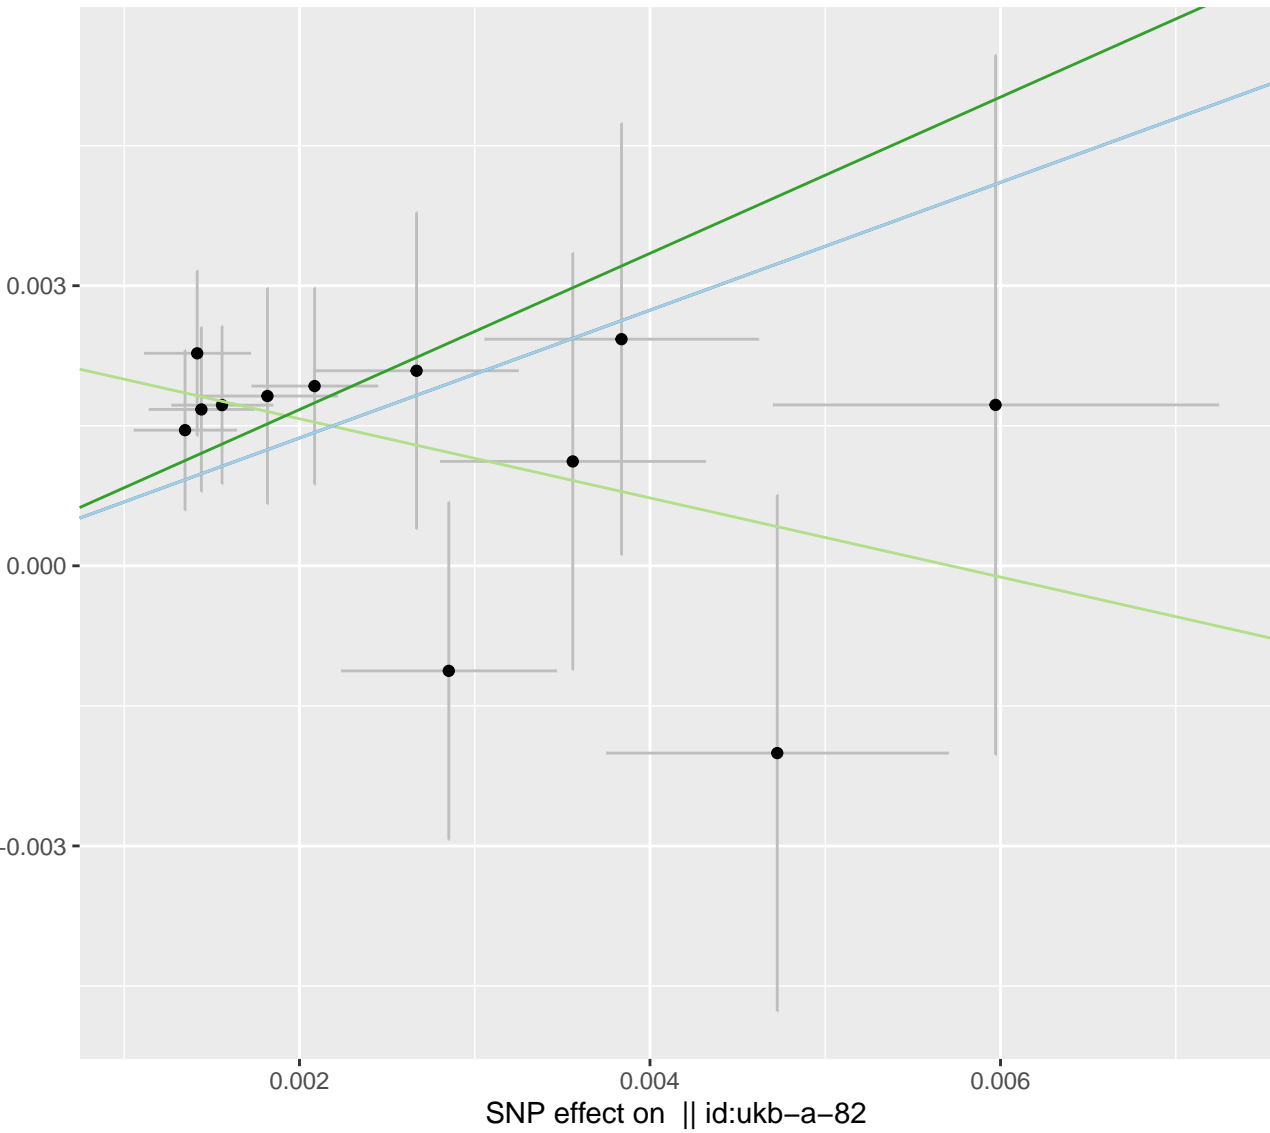

MR Test

- Inverse variance weighted (fixed effects)
- Inverse variance weighted (multiplicative random effects)

- MR Egger
- Weighted median

SNP effect on Pain type(s) experienced in last month: Knee pain - b-16254

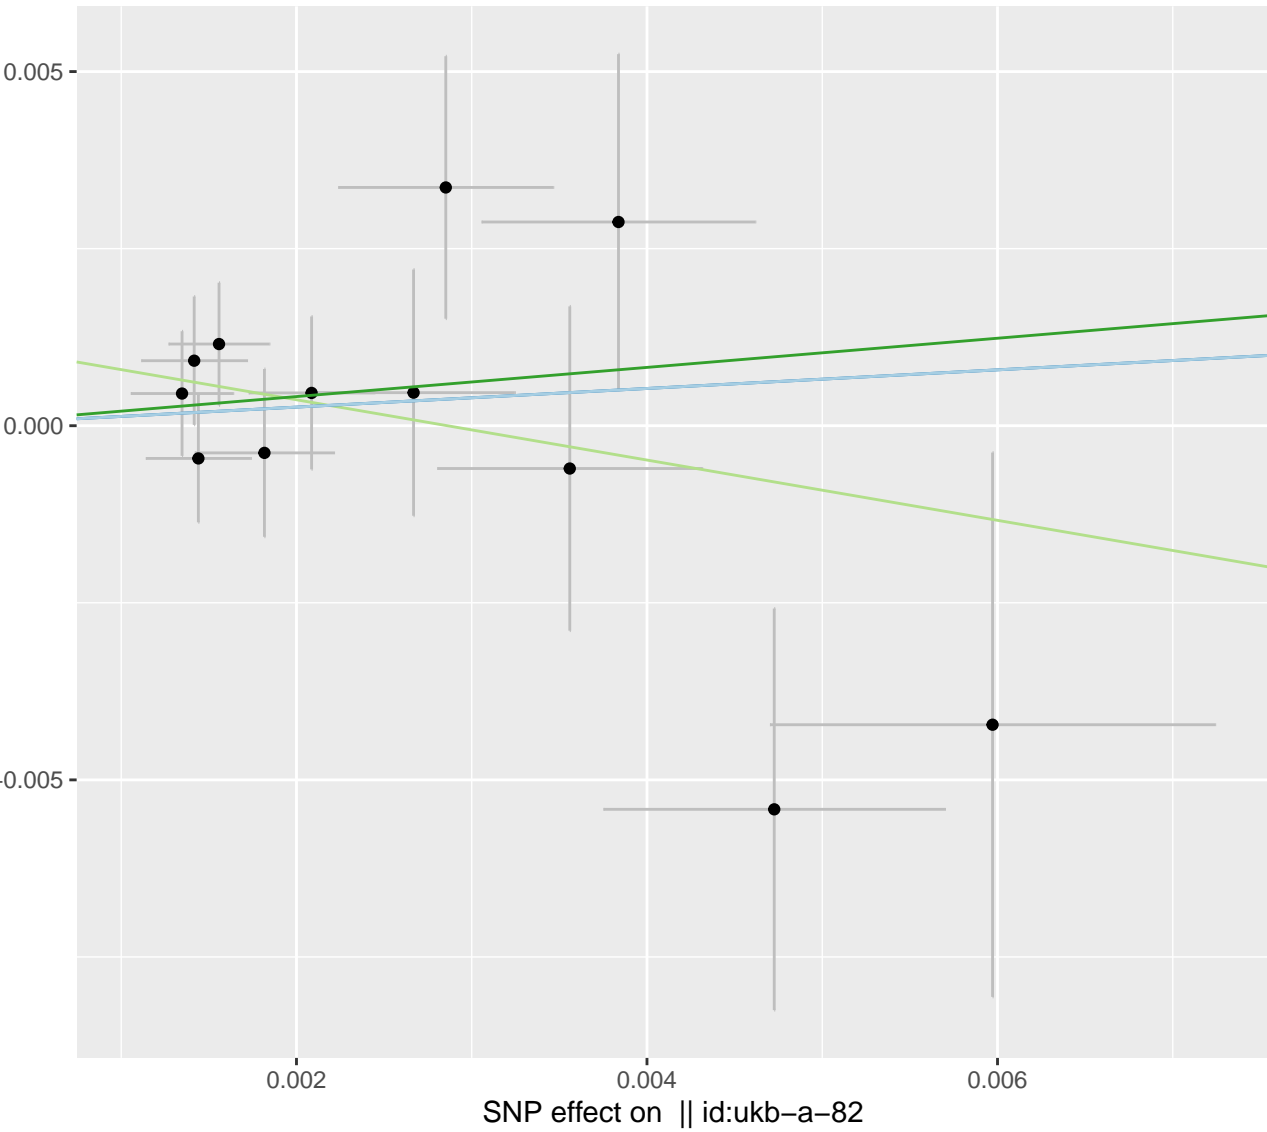



### MR Test

- Inverse variance weighted (fixed effects)
- Inverse variance weighted (multiplicative random effects)
- MR Egger
- Weighted median

SNP effect on Pain type(s) experienced in last month: Facial pain || id:ukb-b-17107

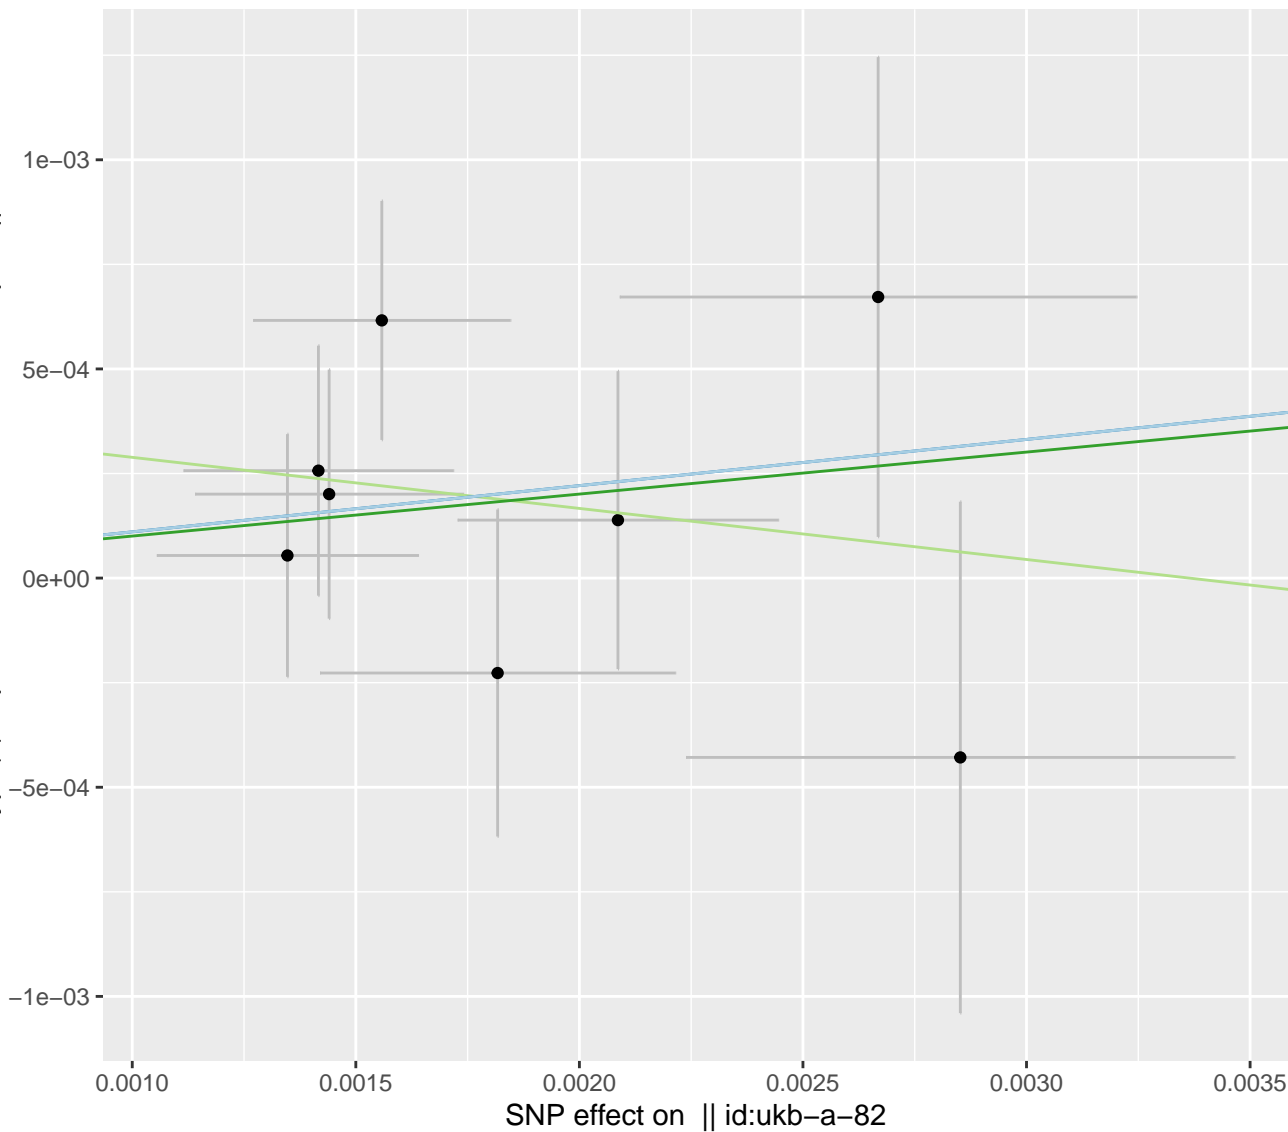

SNP effect on Pain type(s) experienced in last month: Neck or shoulder pain || id:ukb-b-18596

MR Test

- Inverse variance weighted (fixed effects)
- Inverse variance weighted (multiplicative random effects)
- MR Egger
- Weighted median

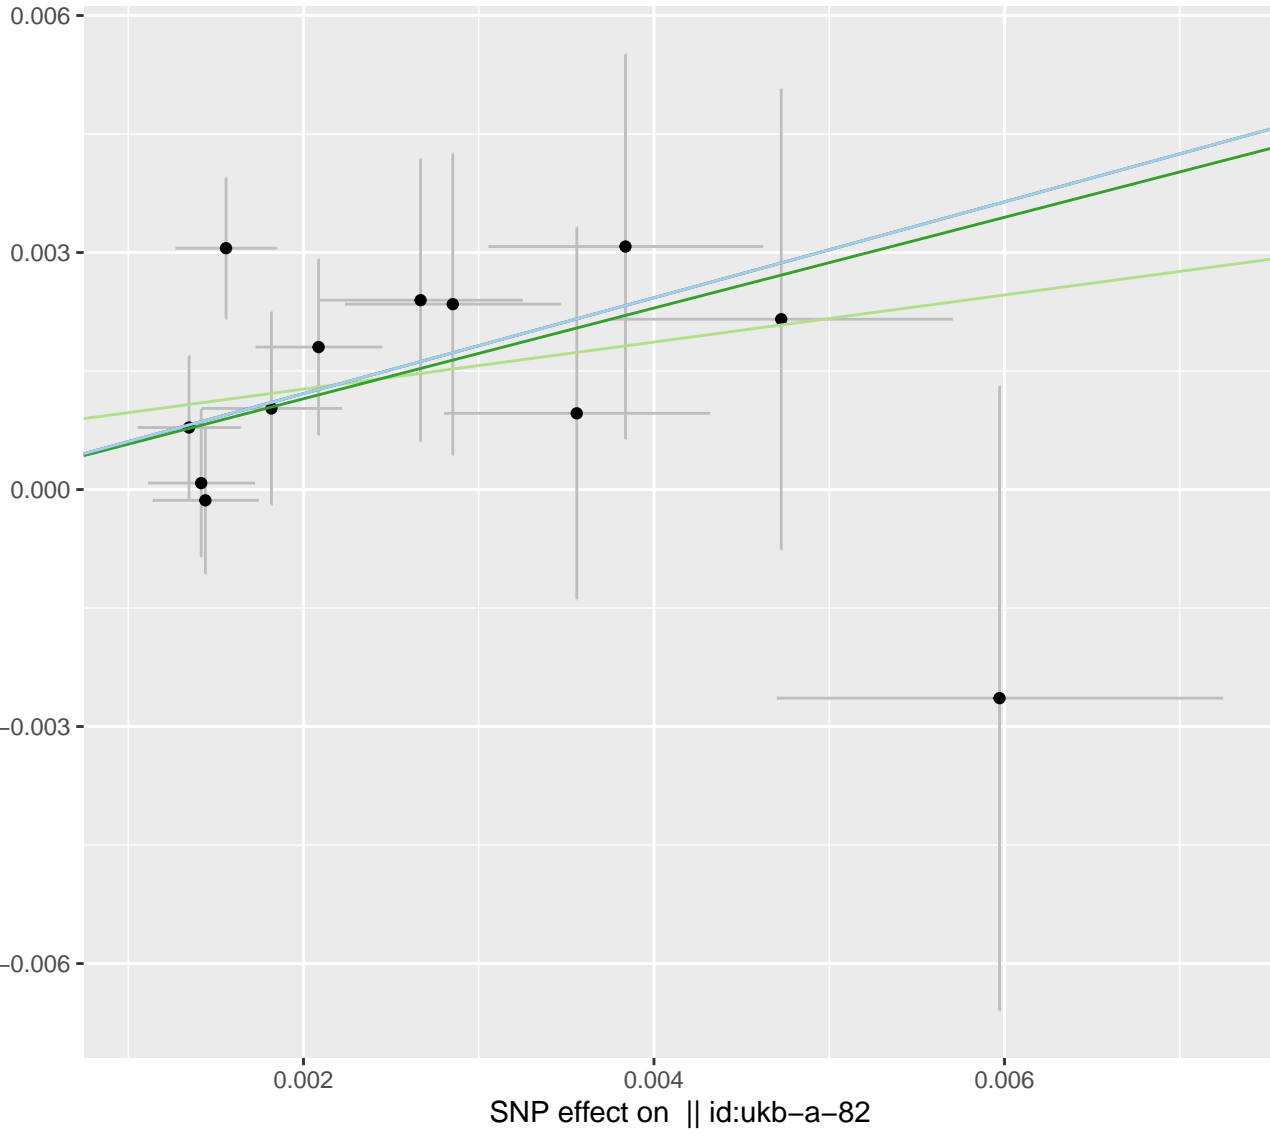

### MR Test

Inverse variance weighted (fixed effects)

Inverse variance weighted (multiplicative random effects)

MR Egger

Weighted median

SNP effect on Pain type(s) experienced in last month: Hip pain || id:ukb-b-7289

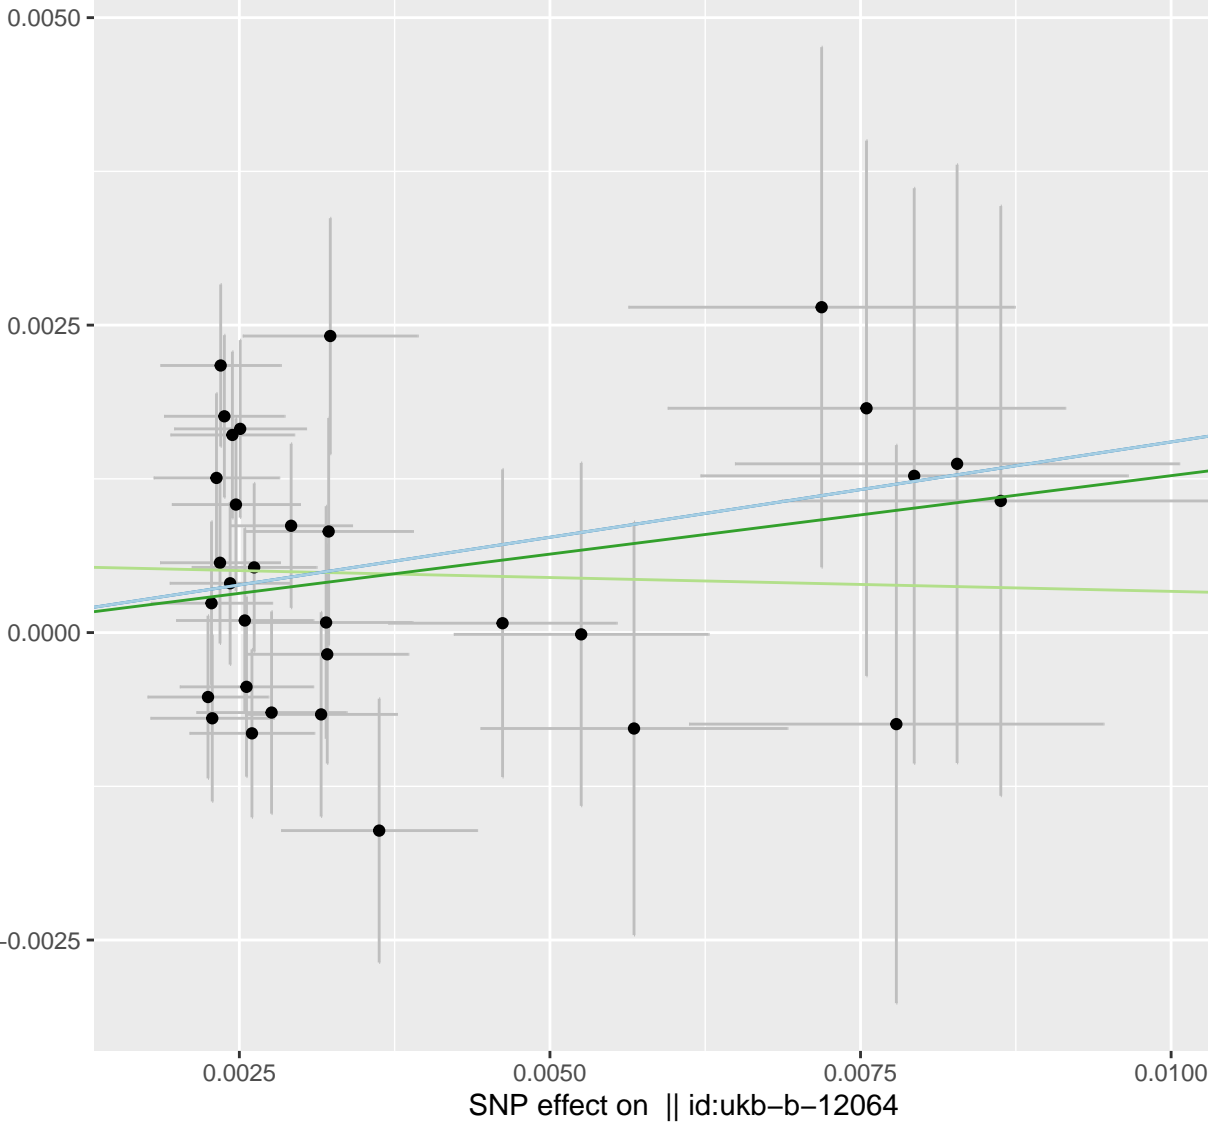

MR Test

Inverse variance weighted (fixed effects)

Inverse variance weighted (multiplicative random effects)

MR Egger

Weighted median

SNP effect on Pain type(s) experienced in last month: None of the above || id:ukb-b-9130

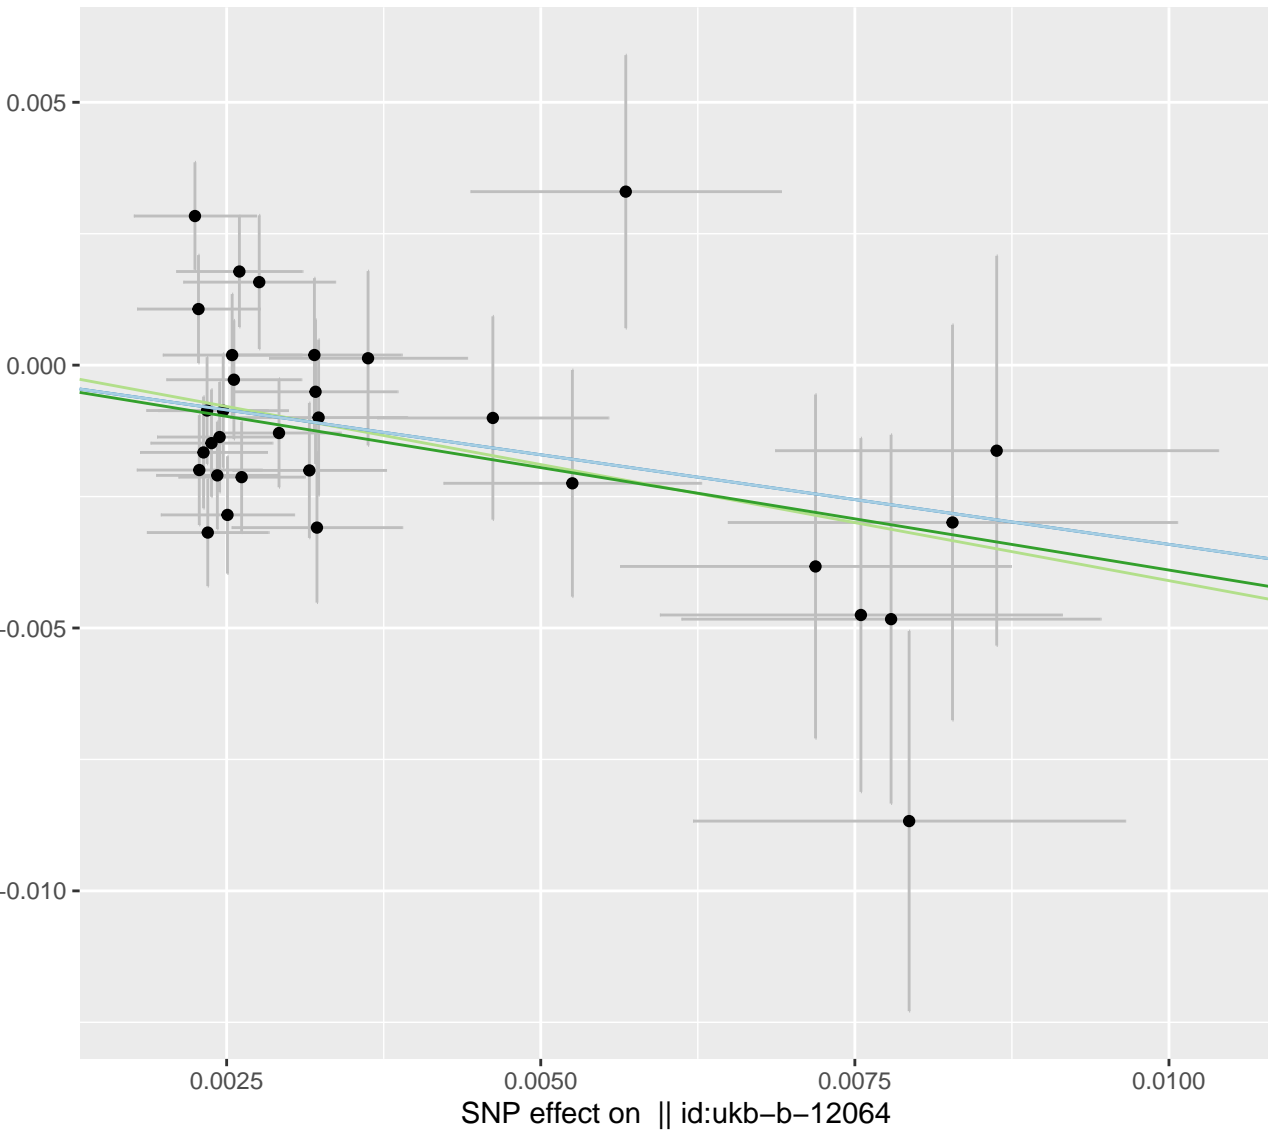

### MR Test

Inverse variance weighted (fixed effects)  
Inverse variance weighted (multiplicative random effects)

MR Egger  
Weighted median

SNP effect on Pain type(s) experienced in last month: Back pain || id:ukb-b-9838

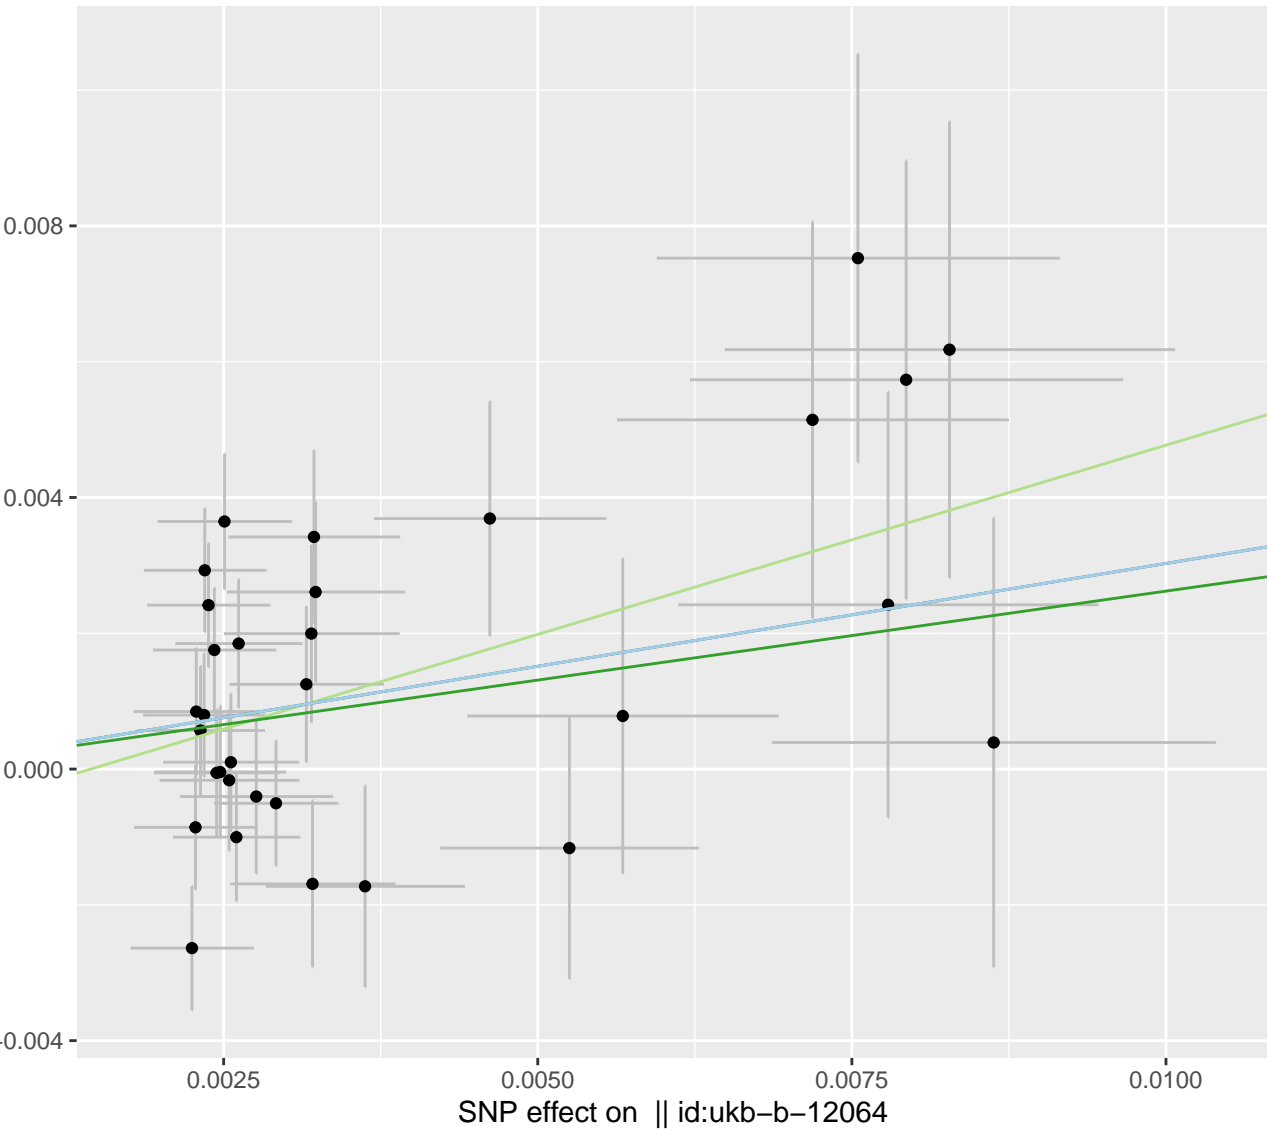

MR Test

Inverse variance weighted (fixed effects)

Inverse variance weighted (multiplicative random effects)

MR Egger

Weighted median

P effect on Pain type(s) experienced in last month: Stomach or abdominal pain || id:ukb-b-11413

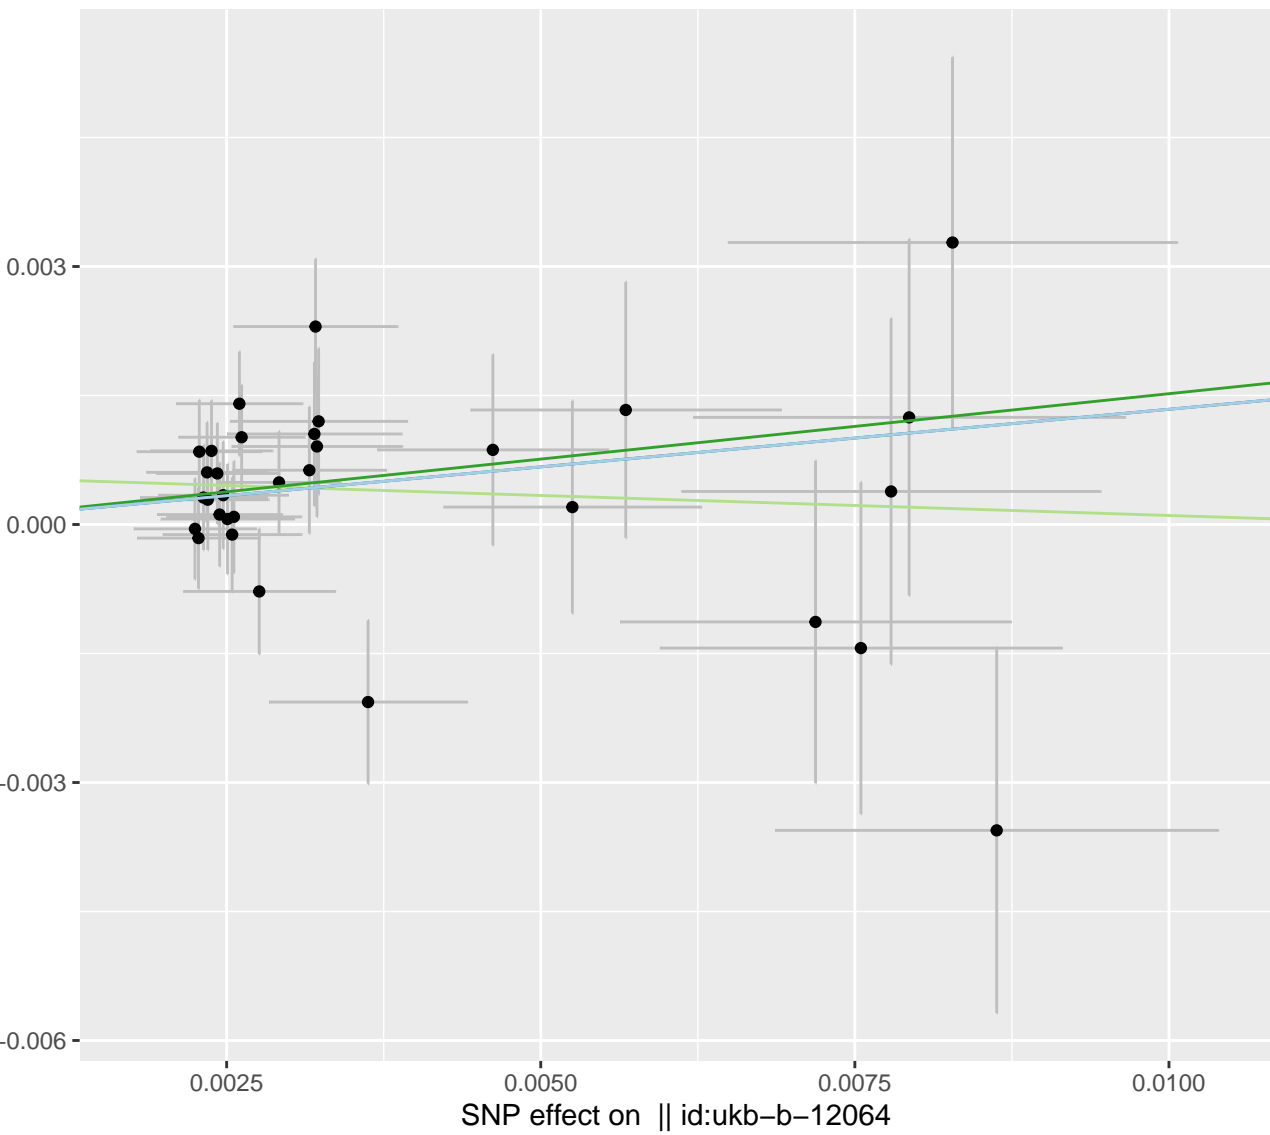

MR Test

- Inverse variance weighted (fixed effects)
- Inverse variance weighted (multiplicative random effects)
- MR Egger
- Weighted median

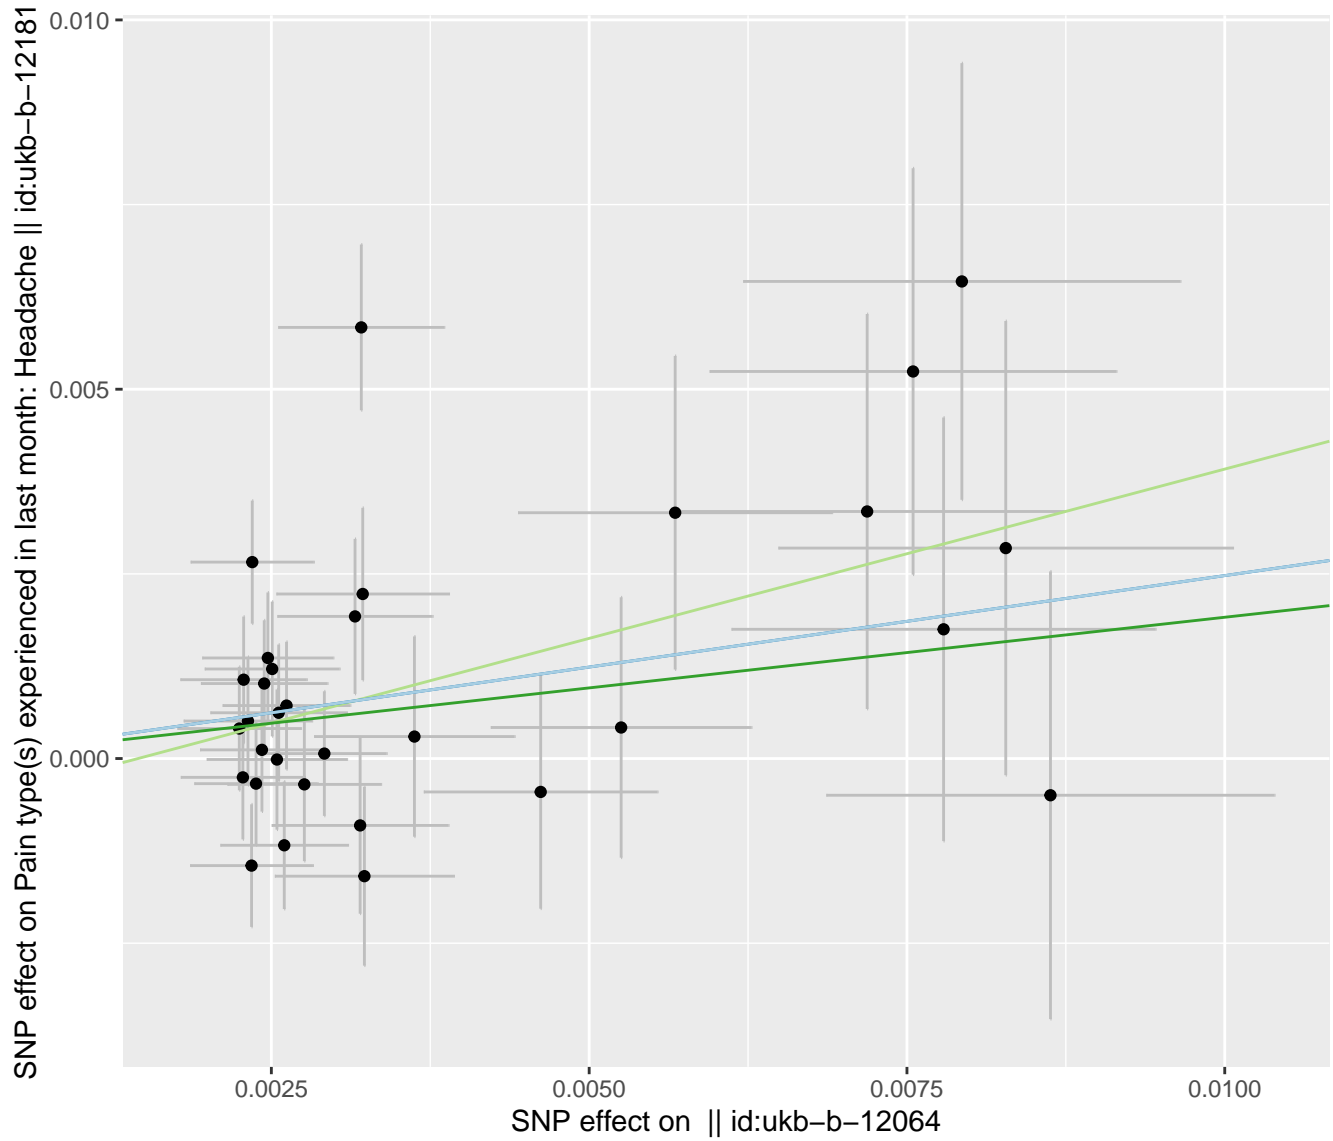

### MR Test

Inverse variance weighted (fixed effects)

Inverse variance weighted (multiplicative random effects)

MR Egger

Weighted median

SNP effect on Pain type(s) experienced in last month: Knee pain || id:ukb-b-16254

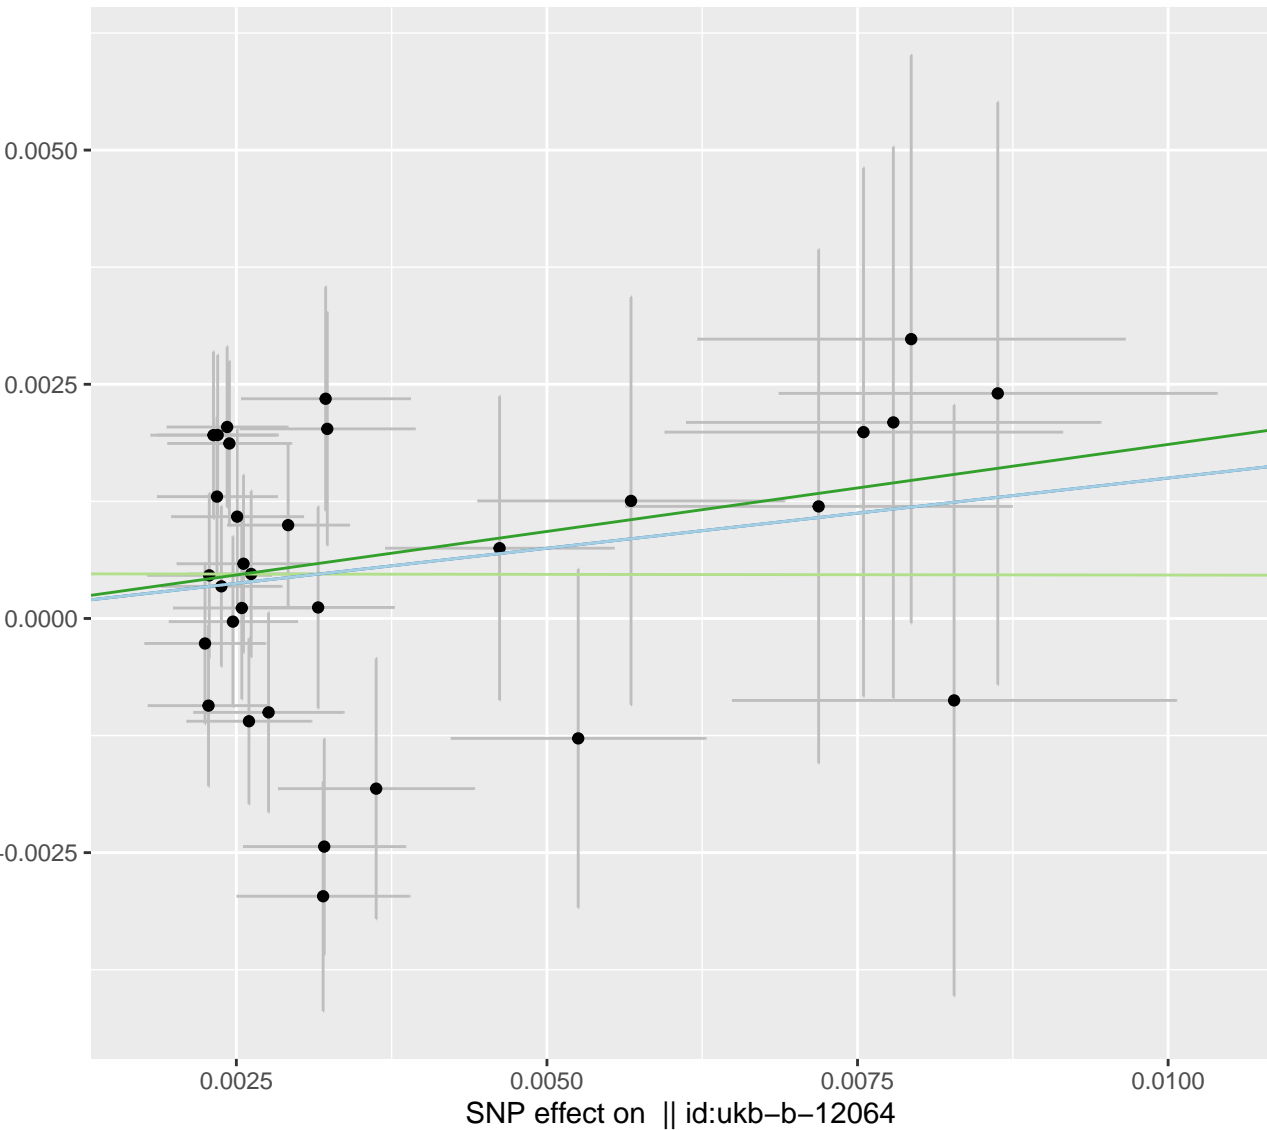



MR Test

Inverse variance weighted (fixed effects)

Inverse variance weighted (multiplicative random effects)

MR Egger

Weighted median

SNP effect on Pain type(s) experienced in last month: Facial pain || id:ukb-b-17107

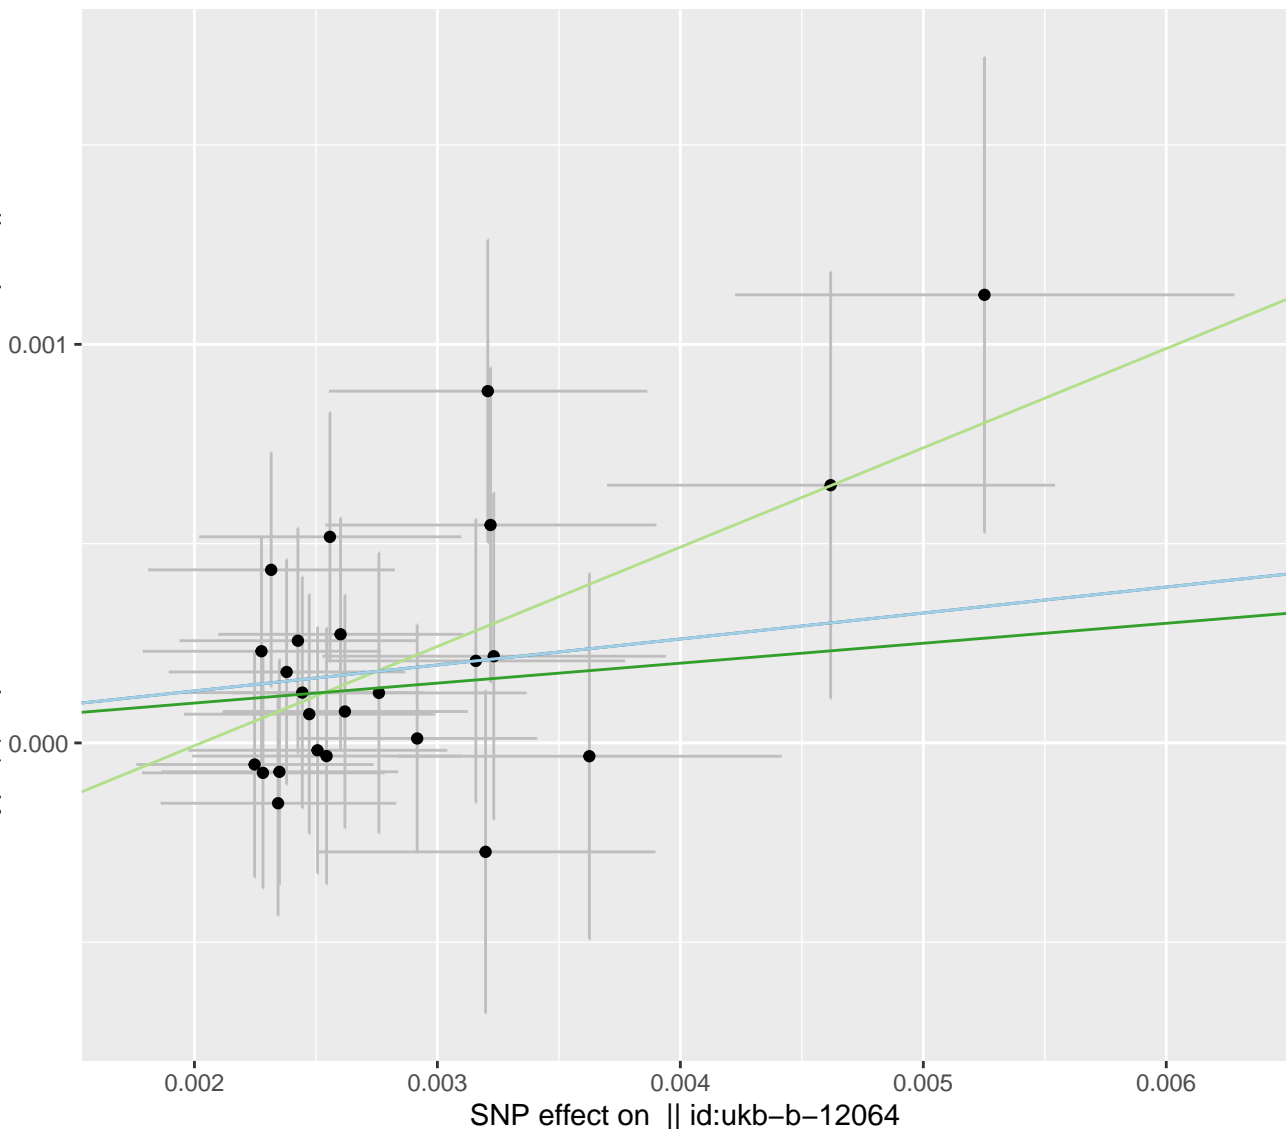

SNP effect on Pain type(s) experienced in last month: Neck or shoulder pain || id:ukb-b-18596

### MR Test

- Inverse variance weighted (fixed effects)
- Inverse variance weighted (multiplicative random effects)
- MR Egger
- Weighted median

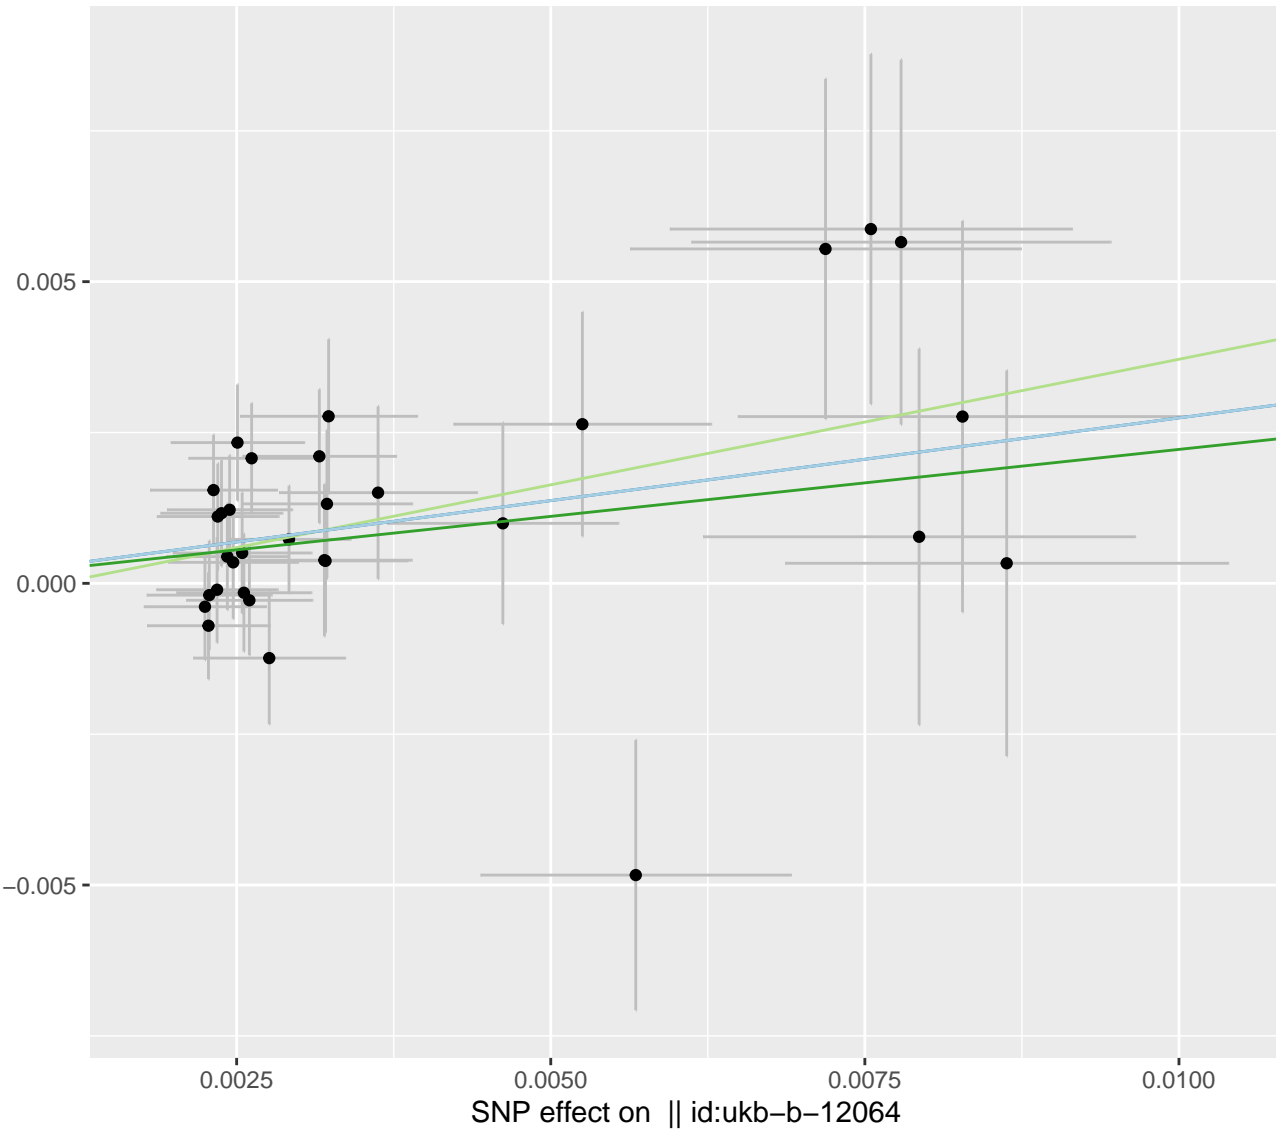

Supplement: 10194_2023_1612_MOESM4_ESM.pdf [file 10194_2023_1612_MOESM4_ESM.pdf]
