# Supplementary material for: Exploring the bidirectional relationship between pain and mental disorders: a comprehensive Mendelian randomization study
Source: PubMed Central journal article supplement (PMC10326936; doi:10.1186/s10194-023-01612-2), 2023-07-07
Supplement: 10194_2023_1612_MOESM6_ESM.pdf [file 10194_2023_1612_MOESM6_ESM.pdf]

## **Supplementary file 6**

Results of Leave-one-out analysis

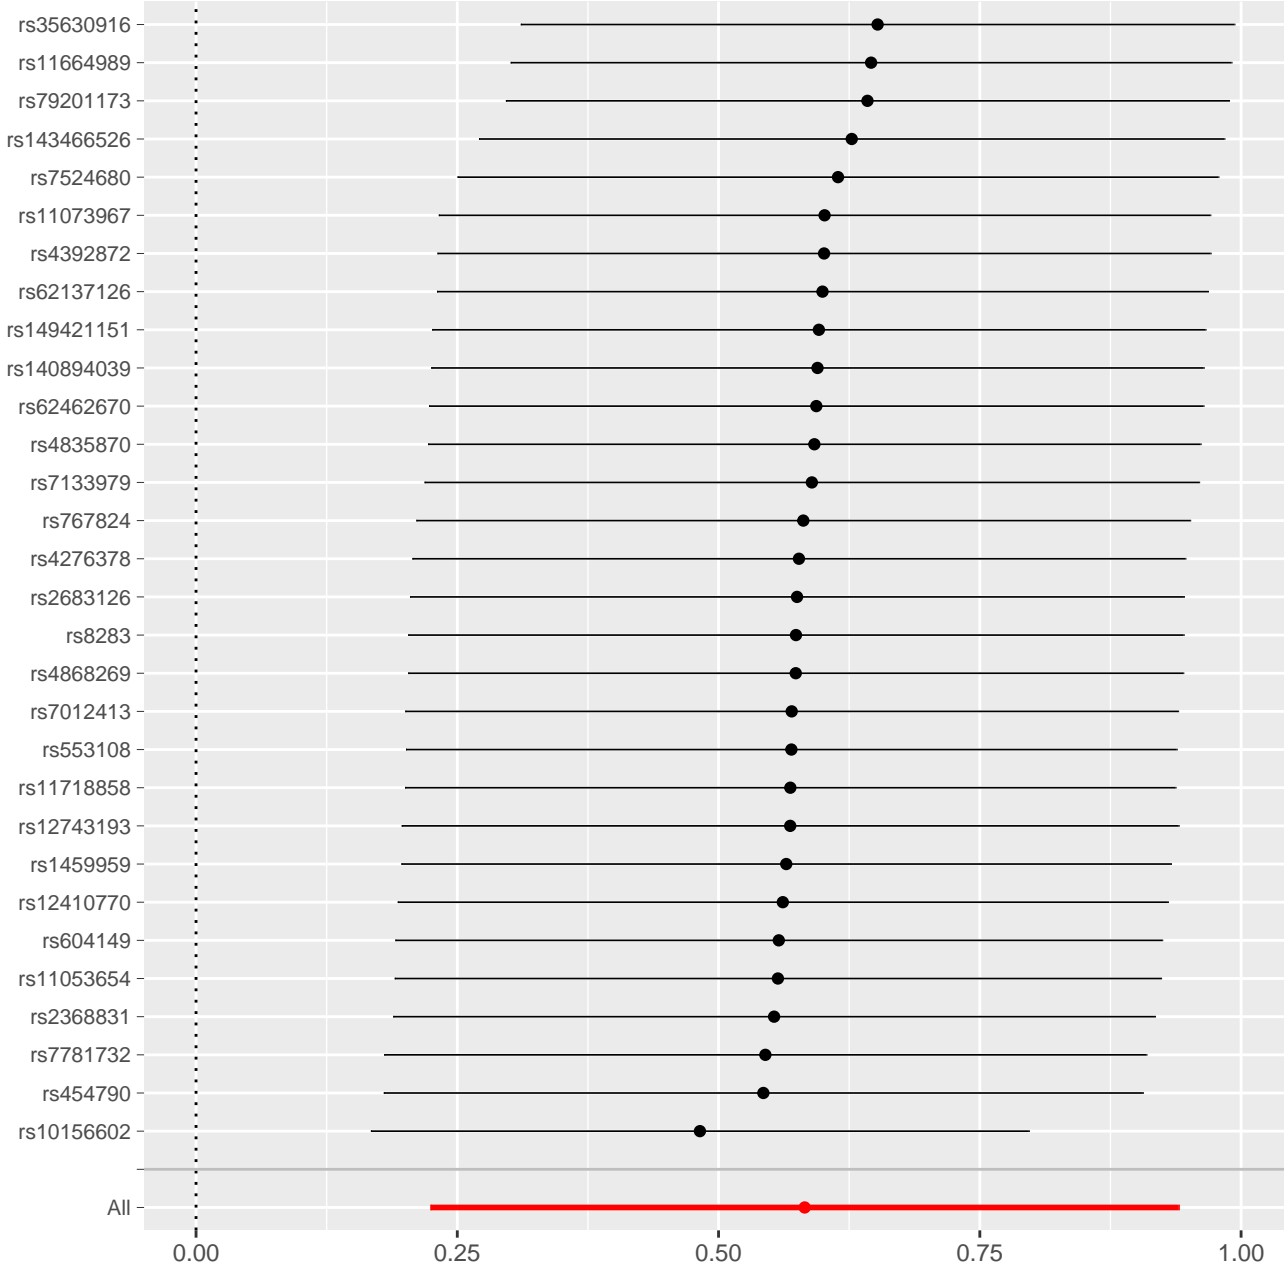

MR leave-one-out sensitivity analysis for ' || id:ukb-b-11413' on 'Sleeplessness / insomnia || id:ukb-a-13'

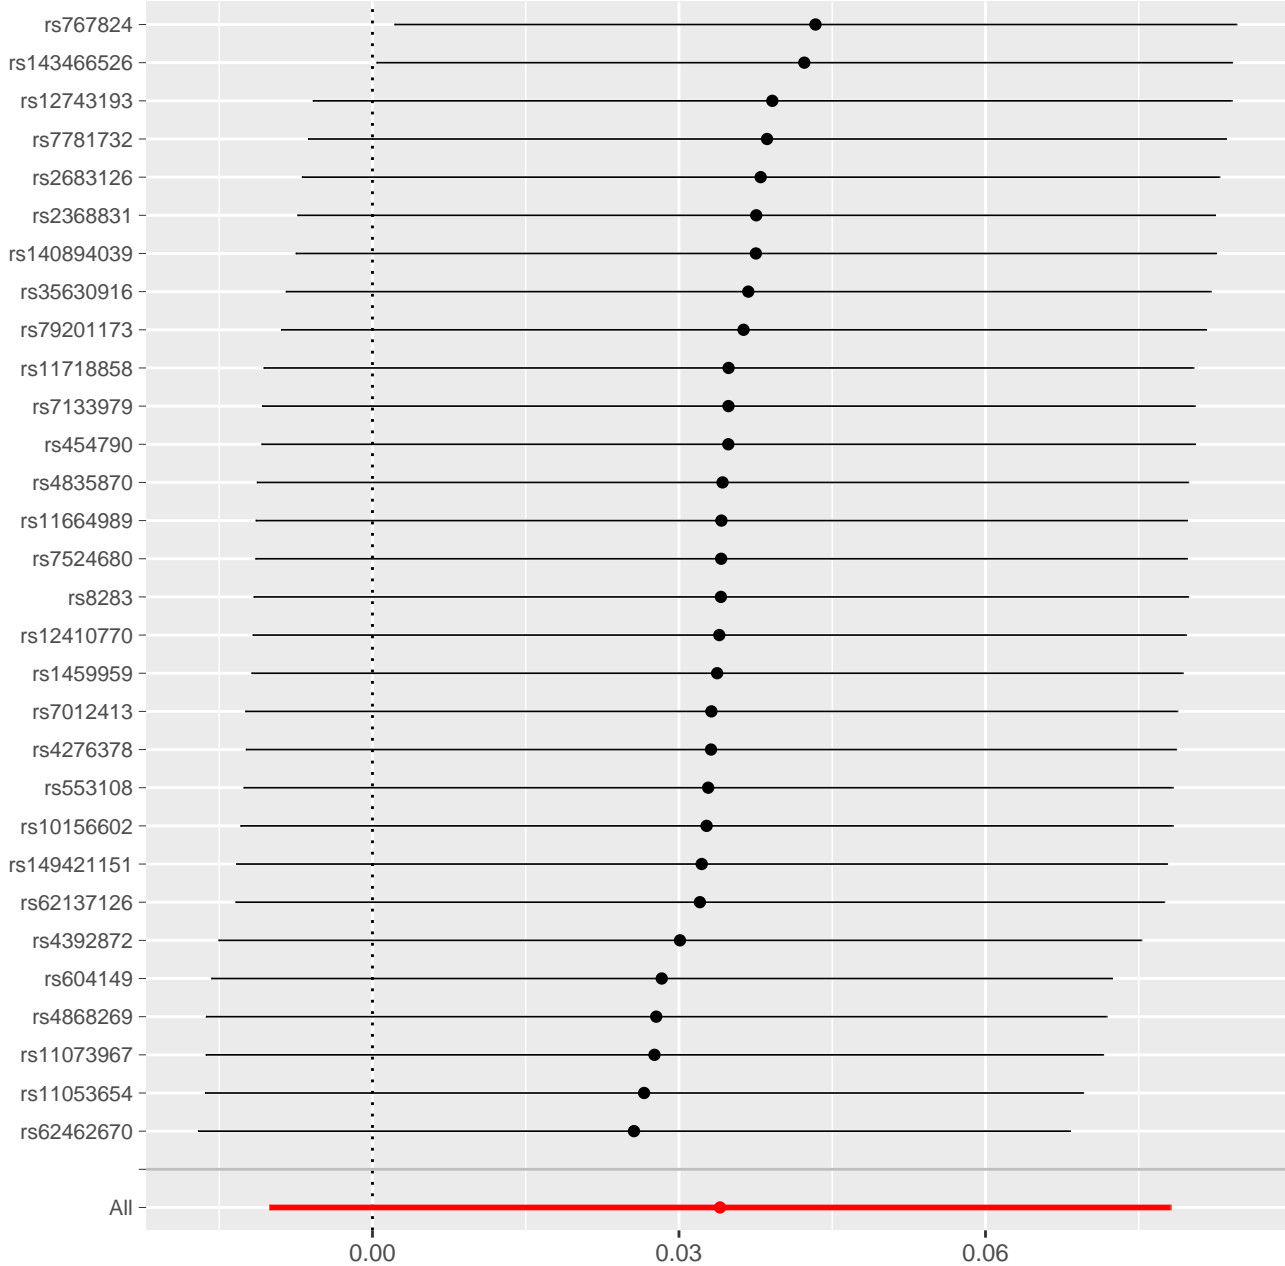

MR leave-one-out sensitivity analysis for ' || id:ukb-b-11413' on 'Non-cancer illness code self-reported: anxiety/panic attacks || id:ukb-a-82'

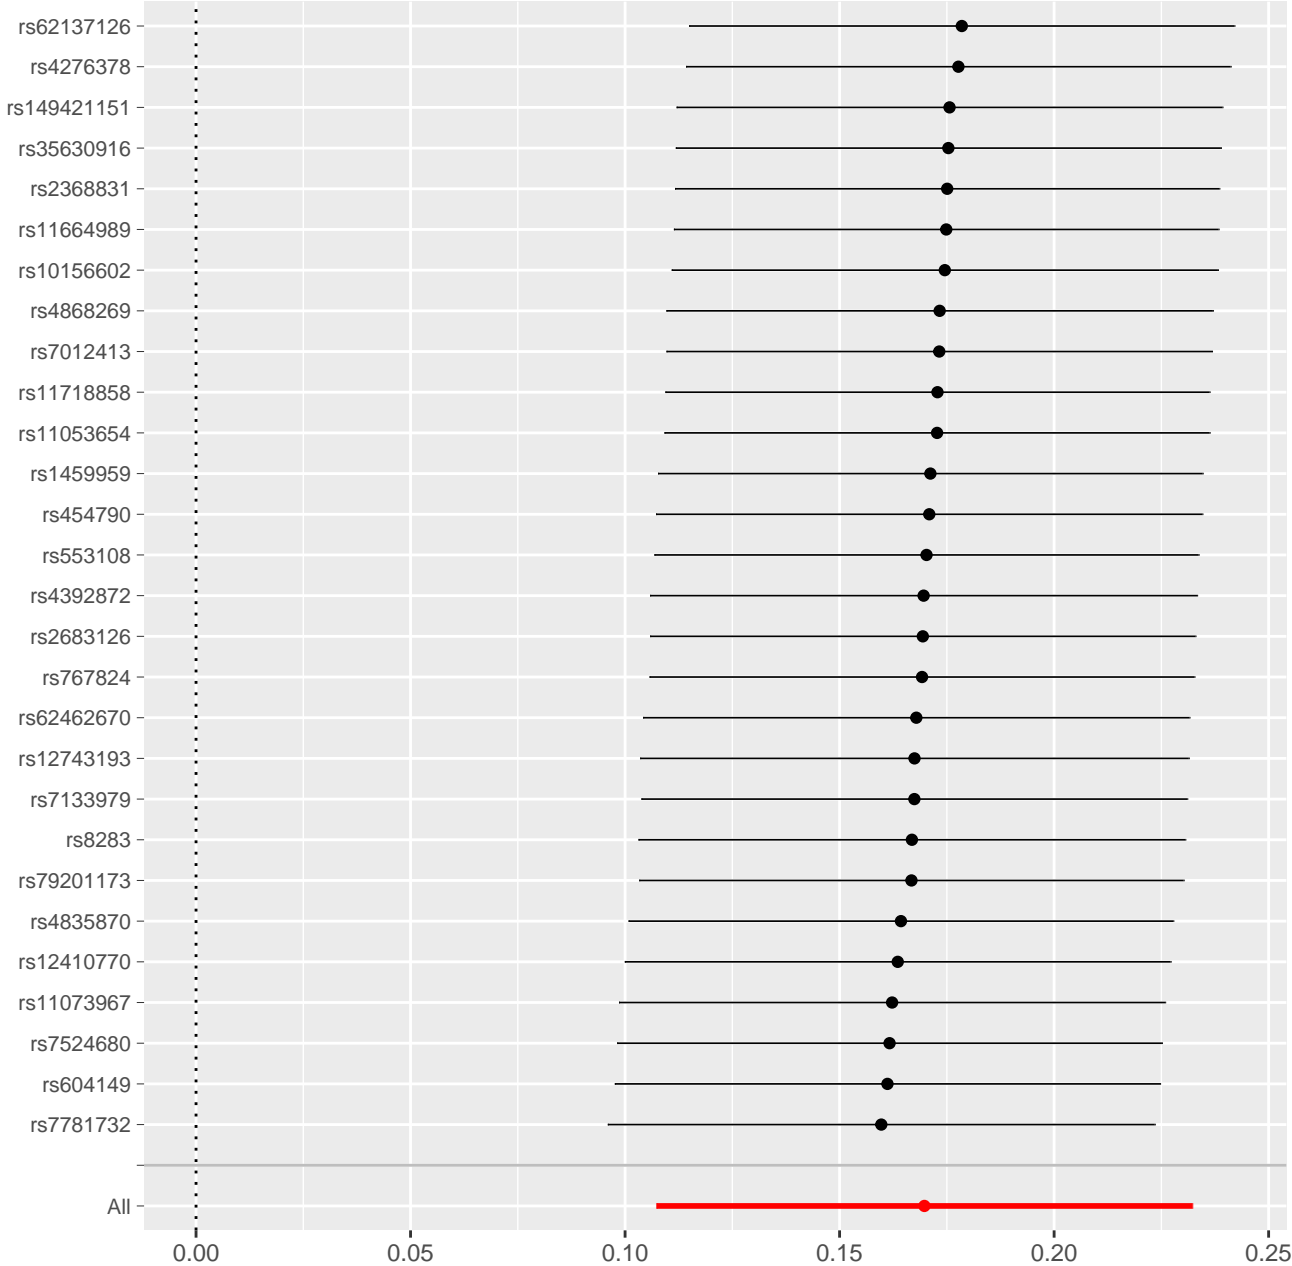

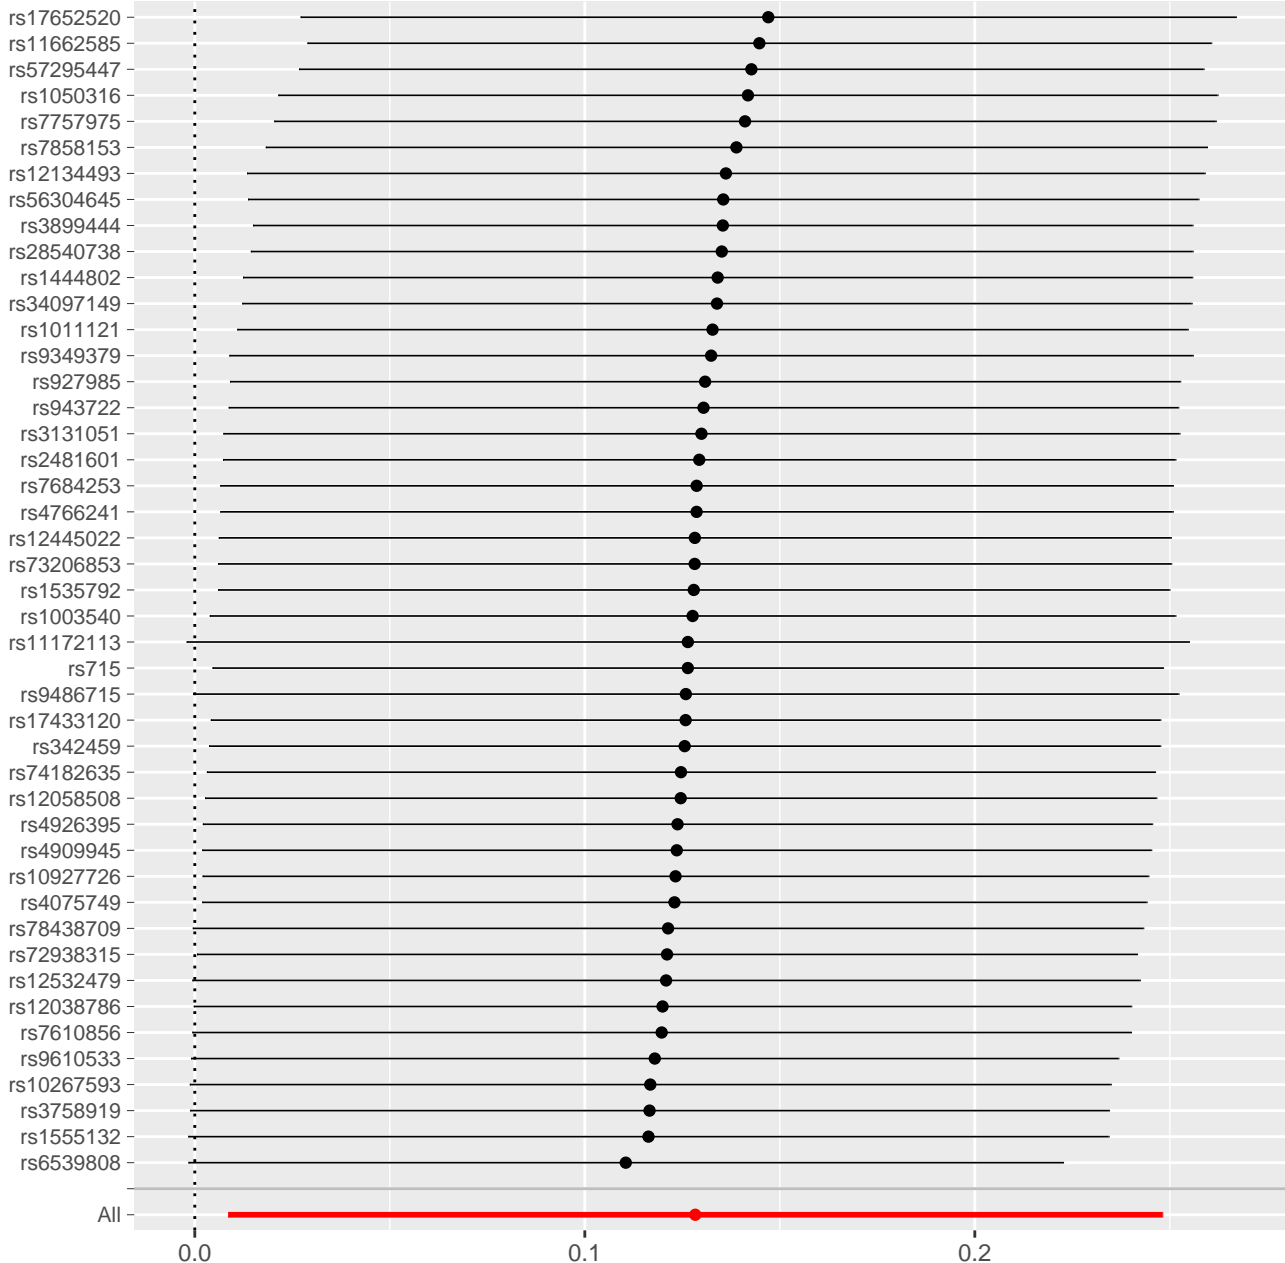

MR leave-one-out sensitivity analysis for 'Pain type(s) experienced in last month: Headache || id:ukb-b-12181' on 'Sleeplessness / insomnia || id:ukb-a-13'

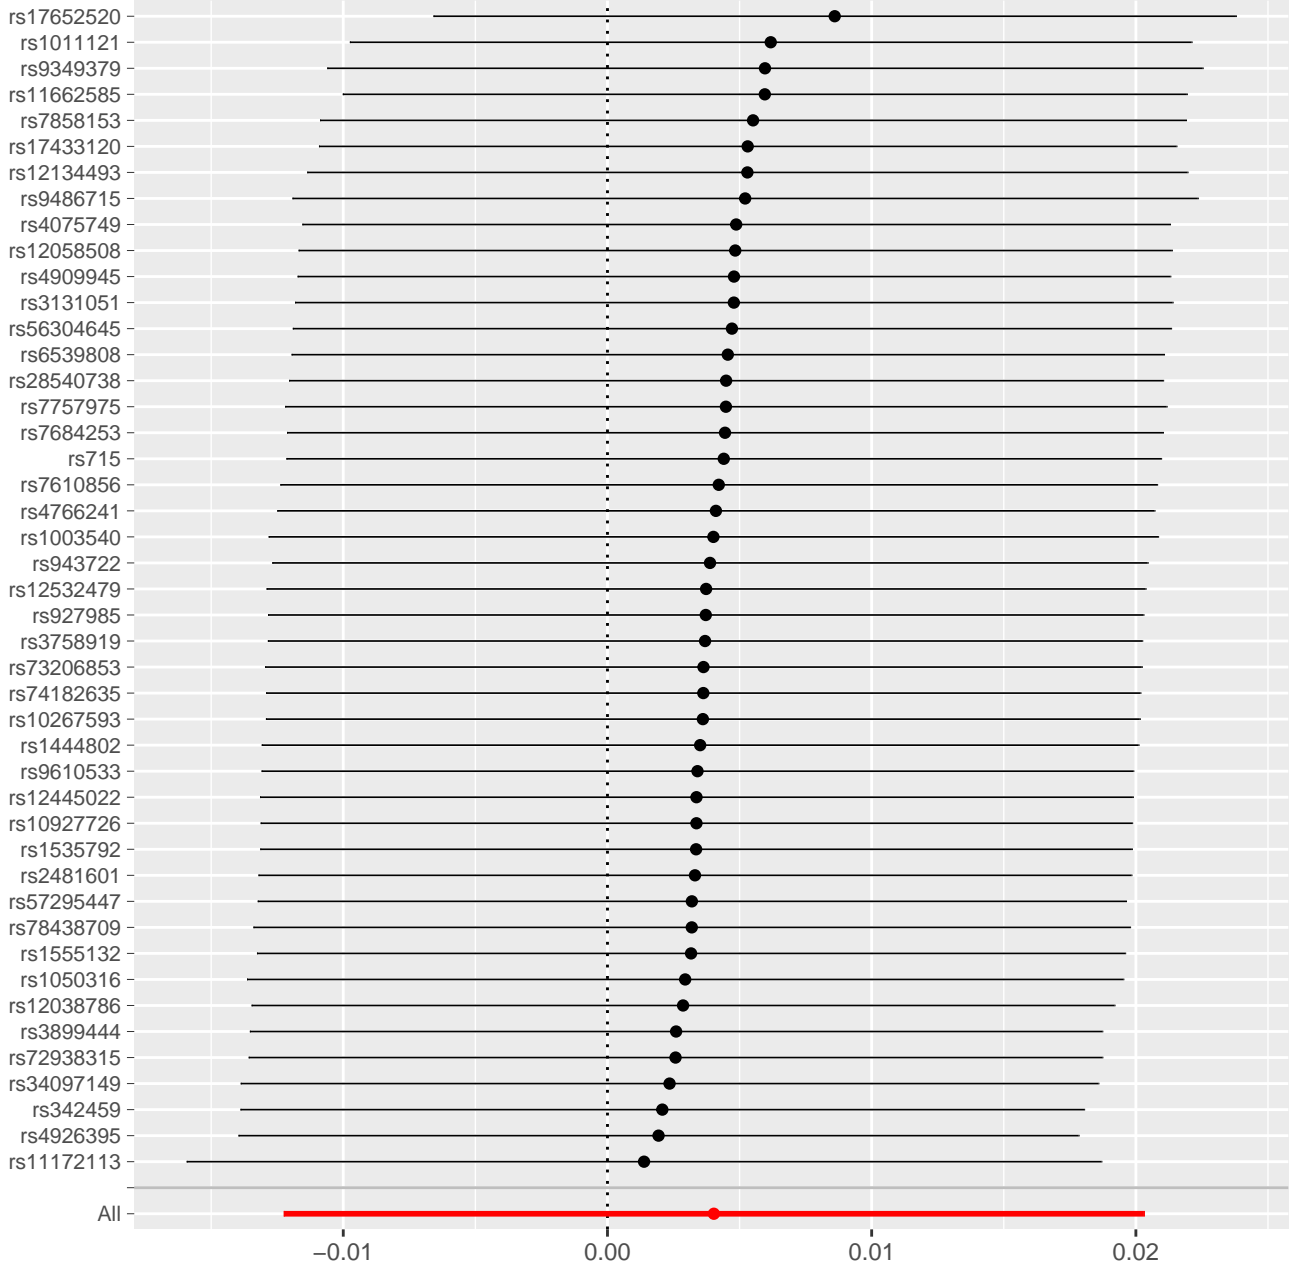

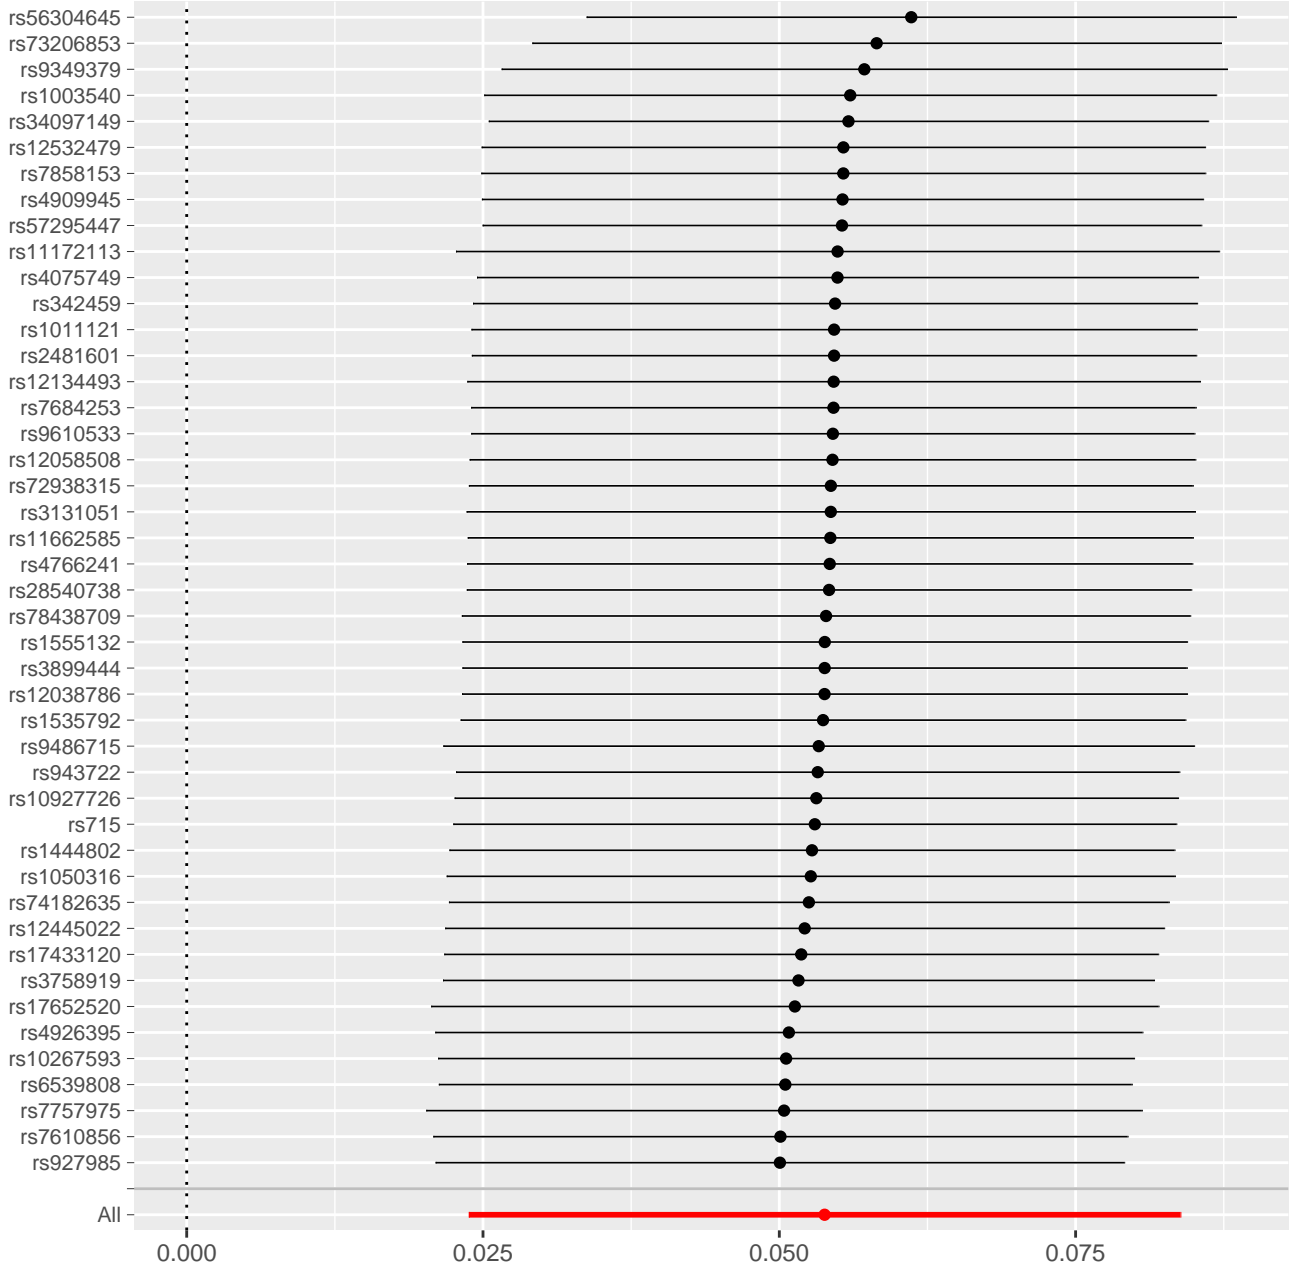

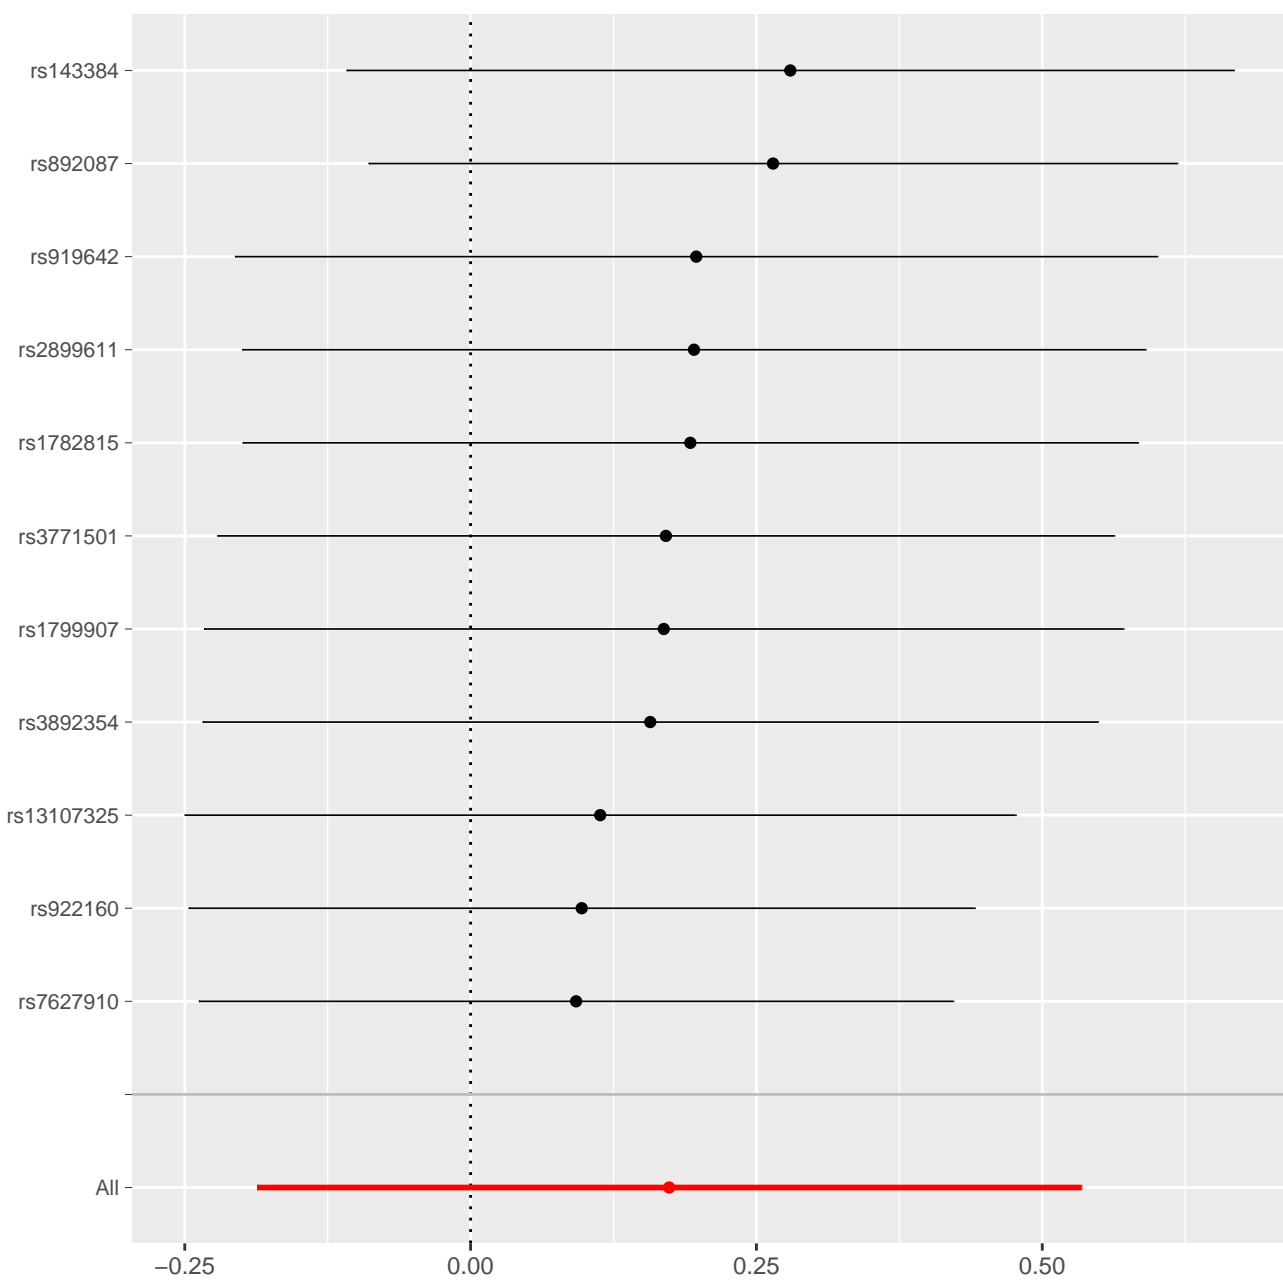

MR leave-one-out sensitivity analysis for 'Pain type(s) experienced in last month: Knee pain || id:ukb-b-16254' on 'Sleeplessness / insomnia || id:ukb-a-13'



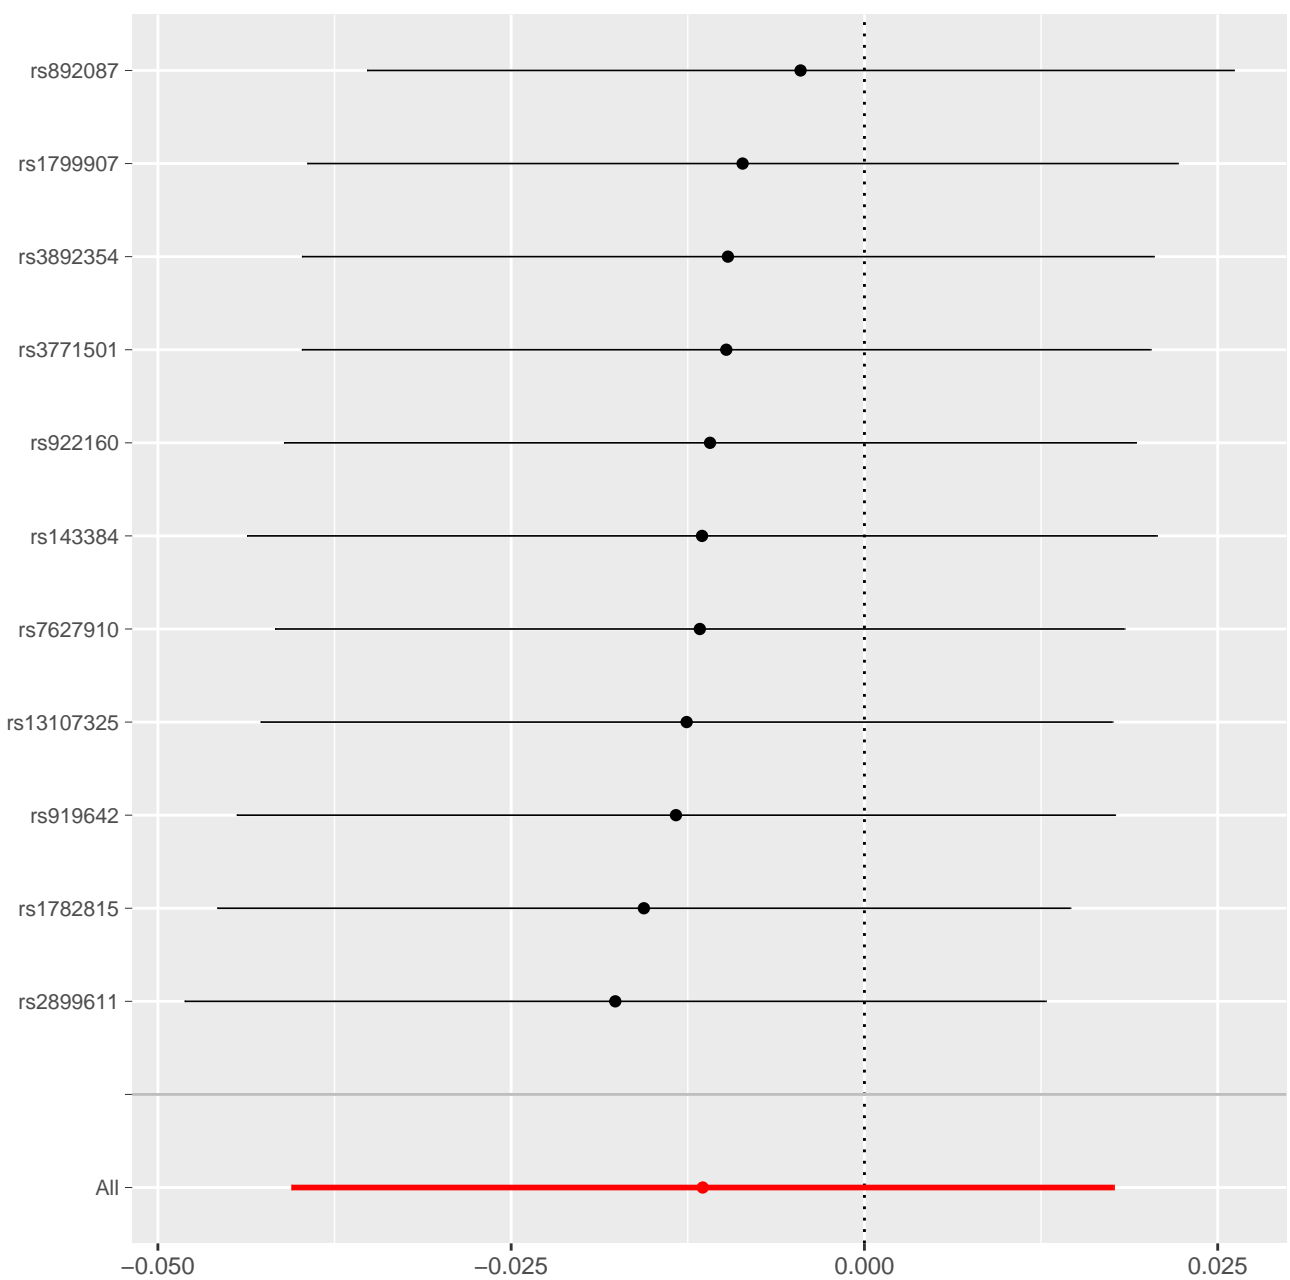

MR leave-one-out sensitivity analysis for 'Pain type(s) experienced in last month: Knee pain || id:ukb-b-16254' on 'Non-cancer illness code self-reported: anxiety/panic attacks || id:ukb-b-16254'

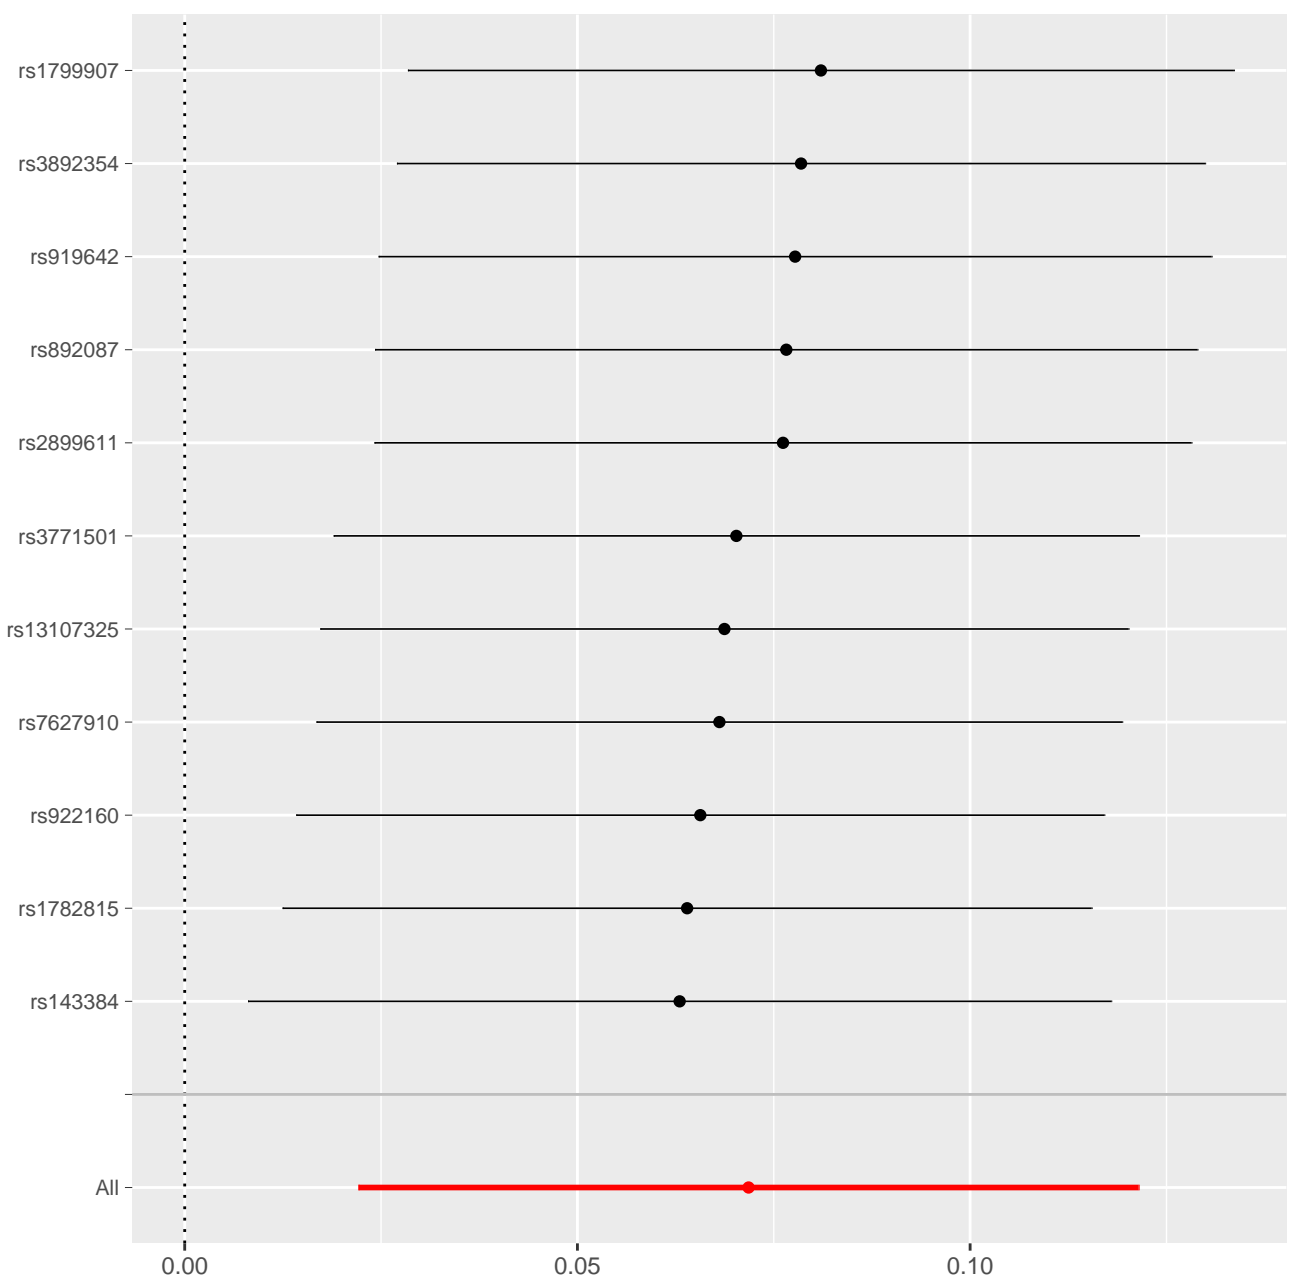

MR leave-one-out sensitivity analysis for

'Pain type(s) experienced in last month: Knee pain || id:ukb-b-16254' on 'Non-cancer illness code, self-reported: depression || id:ukb-

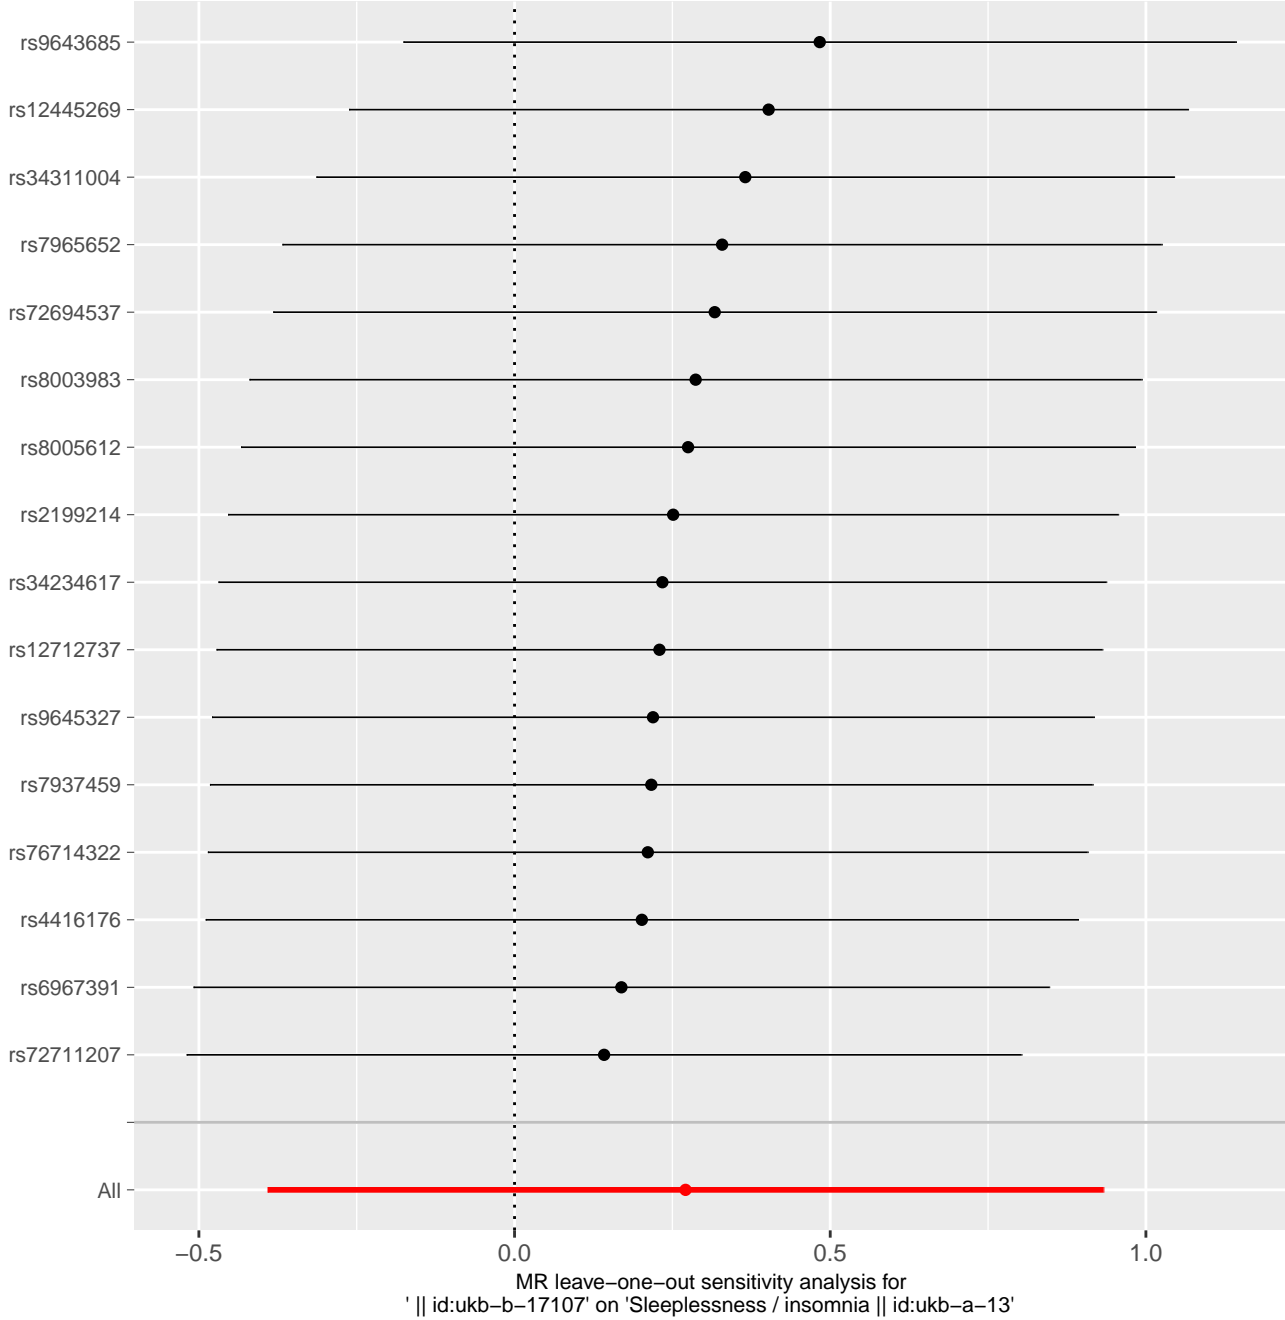

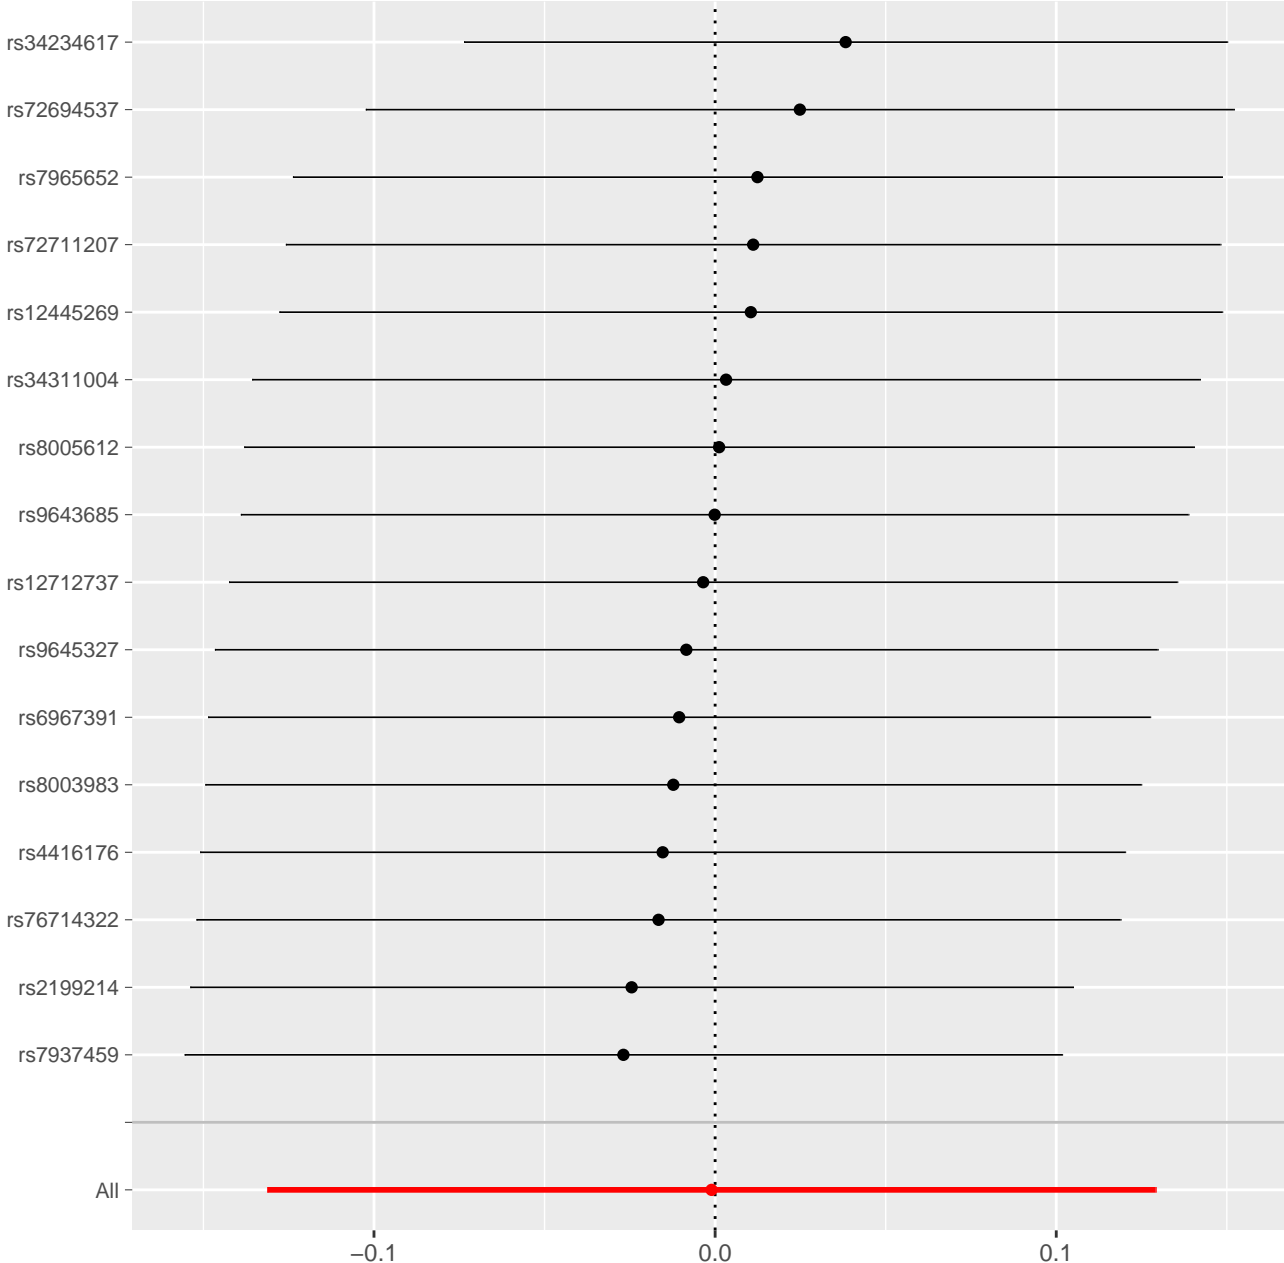

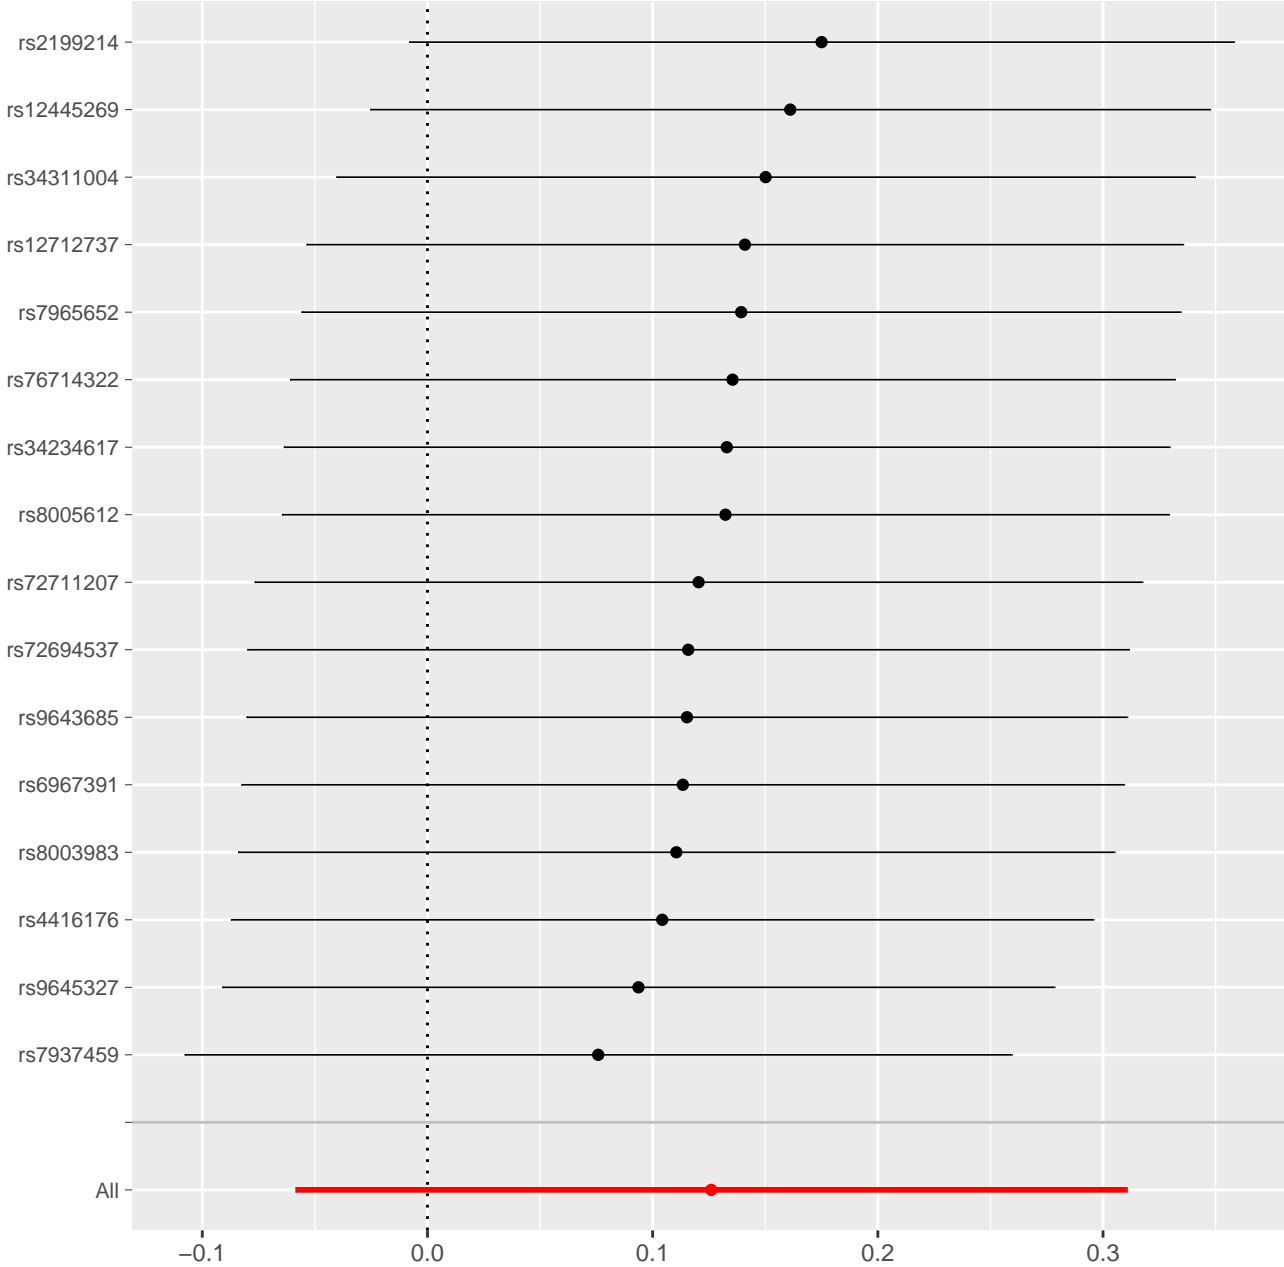

MR leave-one-out sensitivity analysis for ' || id:ukb-b-17107' on 'Non-cancer illness code, self-reported: depression || id:ukb-b-12064'

rs7248205

rs61779314

rs62056490

rs13107325

rs9889282

rs1476535

All

0.0

0.5

1.0

1.5

MR leave-one-out sensitivity analysis for

'Pain type(s) experienced in last month: Neck or shoulder pain || id:ukb-b-18596' on 'Sleeplessness / insomnia || id:ukb-a-13'

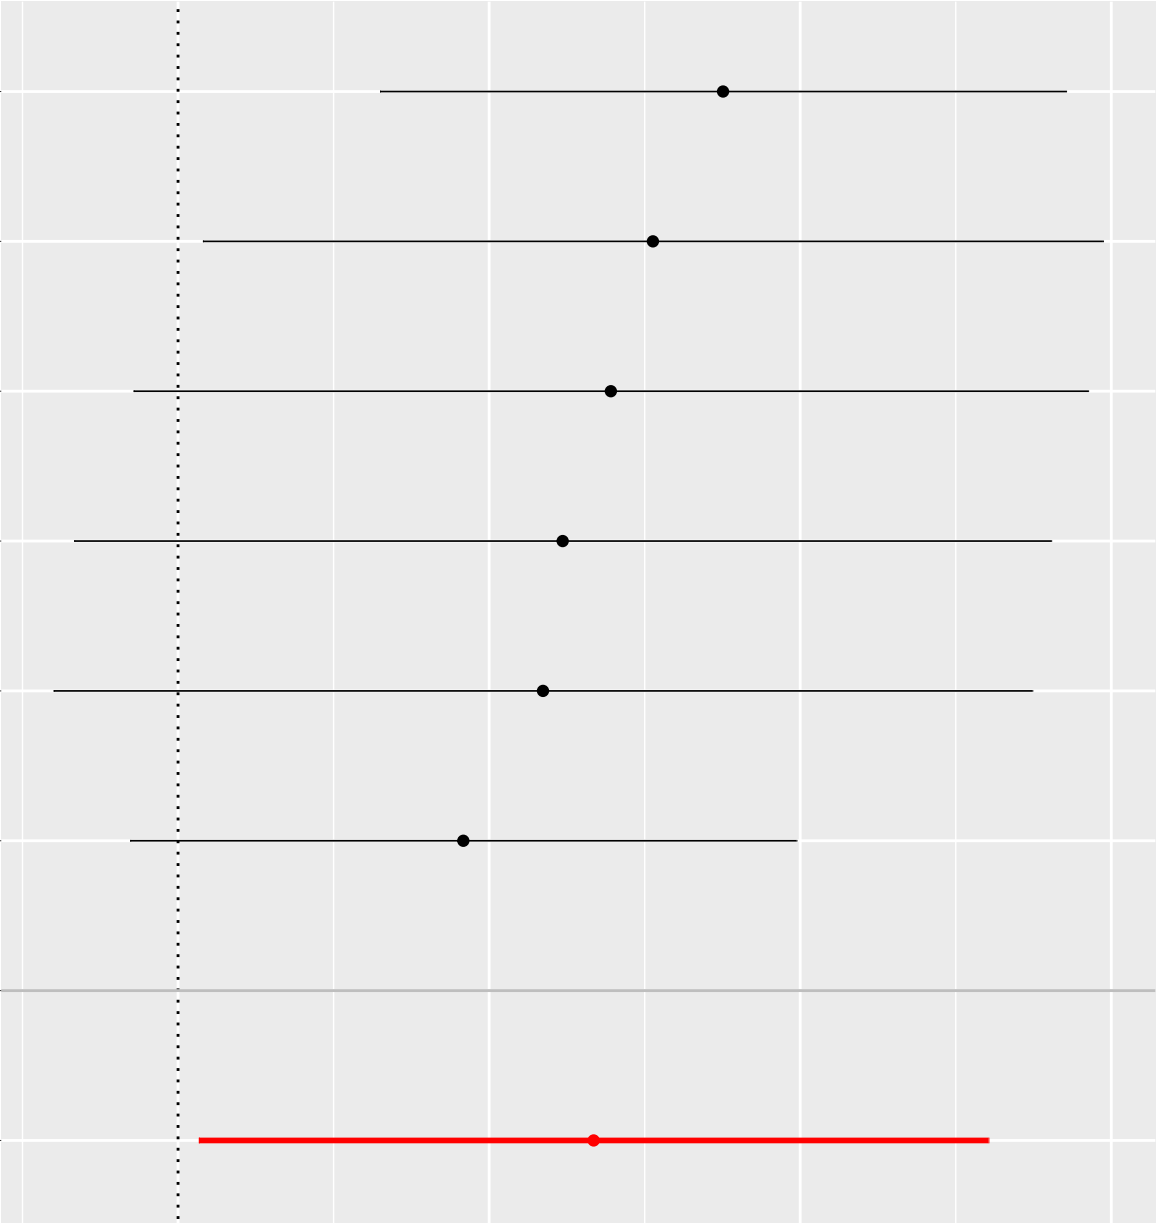

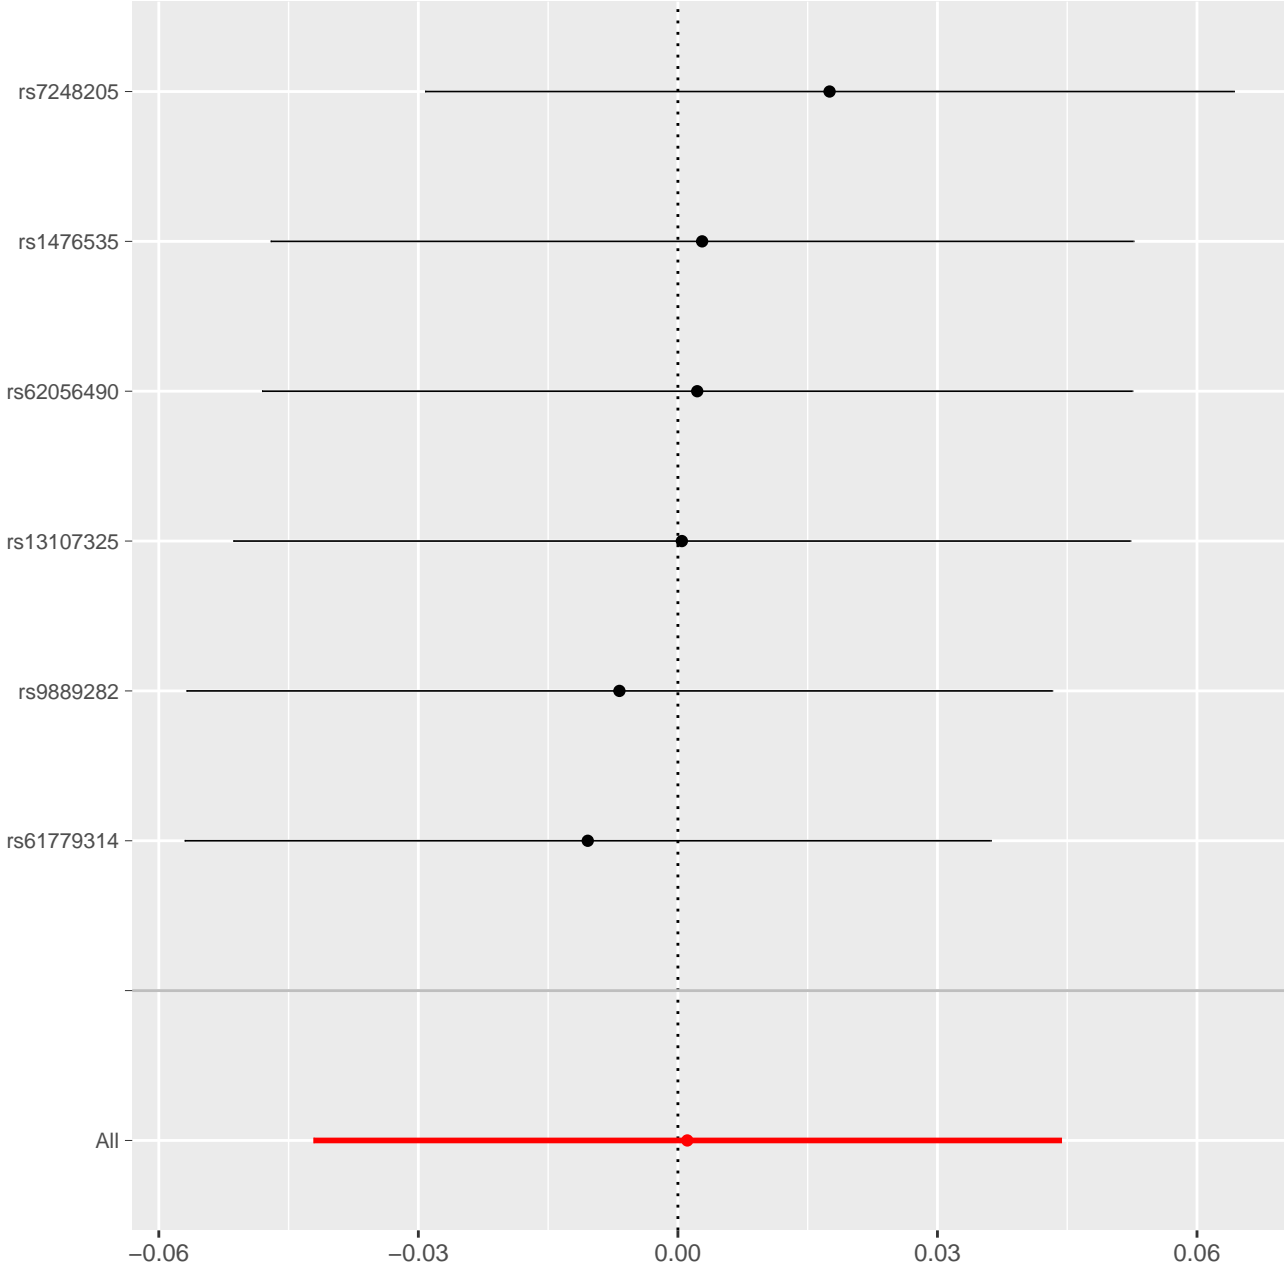

MR leave-one-out sensitivity analysis for Pain type(s) experienced in last month: Neck or shoulder pain || id:ukb-b-18596' on 'Non-cancer illness code self-reported: anxiety/panic attack

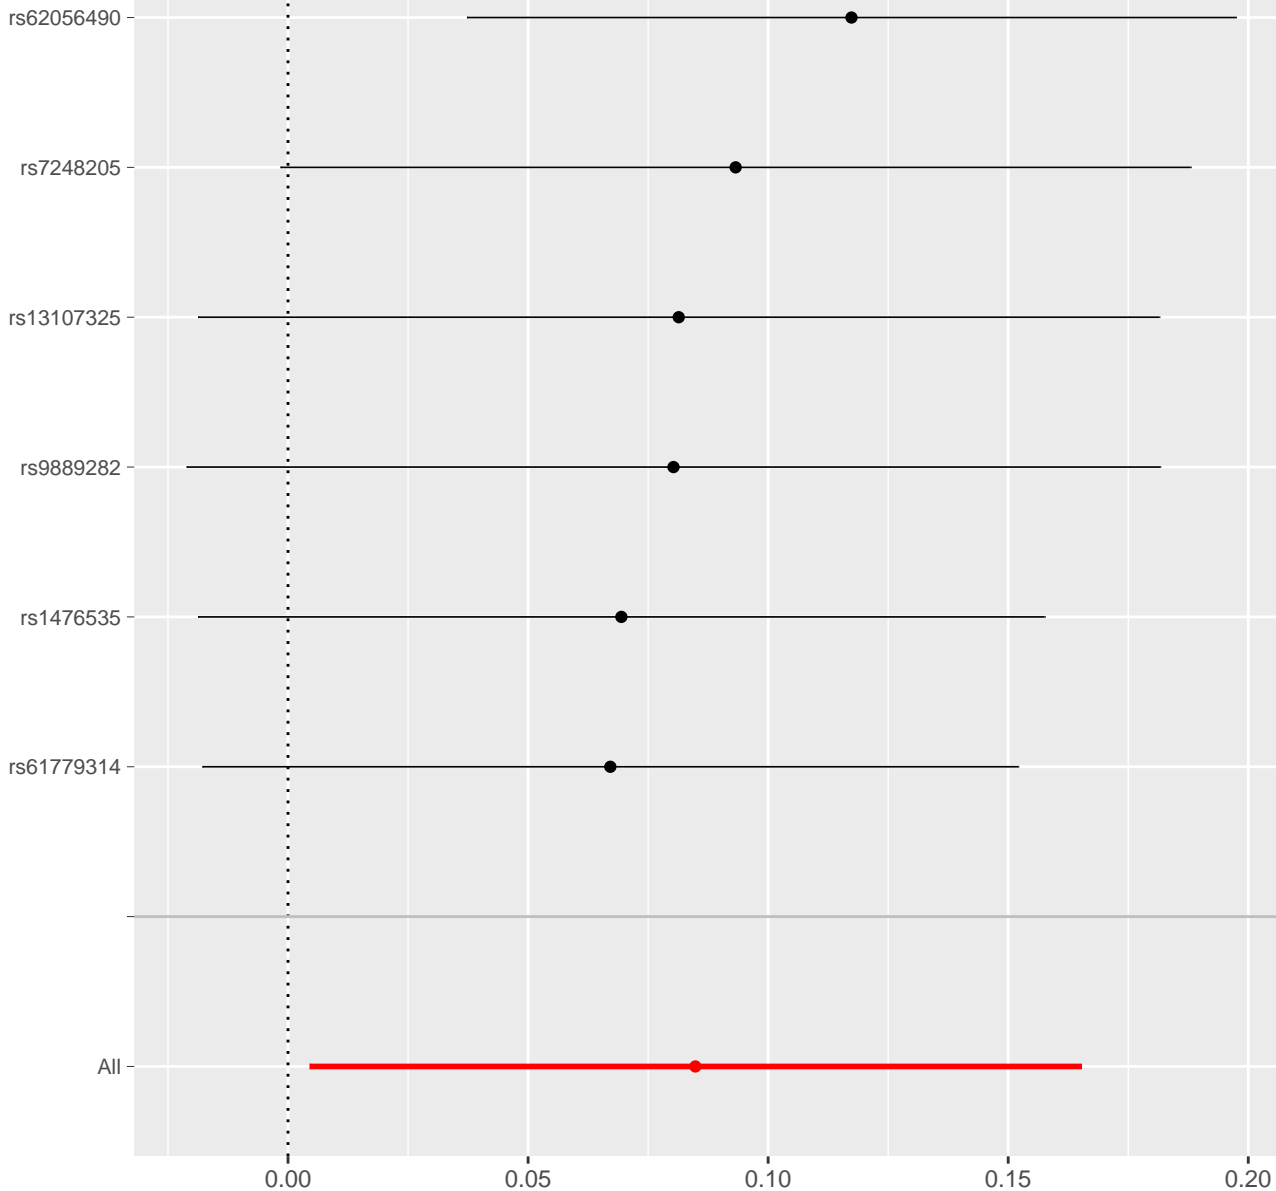

MR leave-one-out sensitivity analysis for 'Pain type(s) experienced in last month: Neck or shoulder pain || id:ukb-b-18596' on 'Non-cancer illness code, self-reported: depression || id:ukb-b-18596'



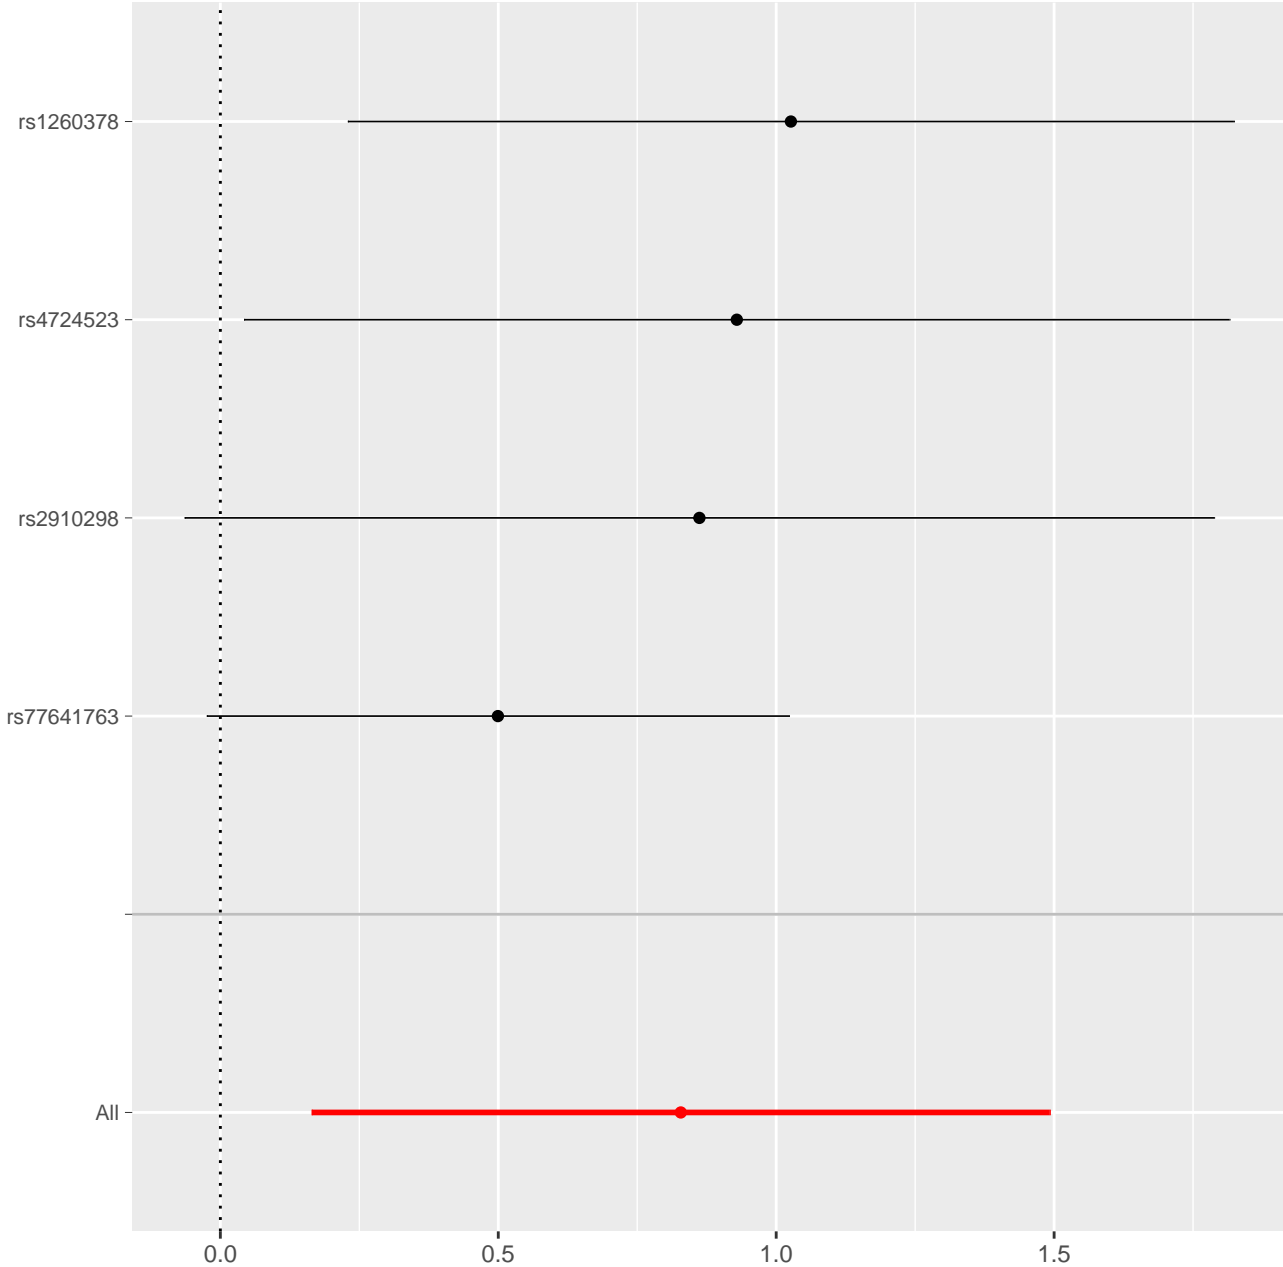

MR leave-one-out sensitivity analysis for 'Pain type(s) experienced in last month: Hip pain || id:ukb-b-7289' on 'Sleeplessness / insomnia || id:ukb-a-13'

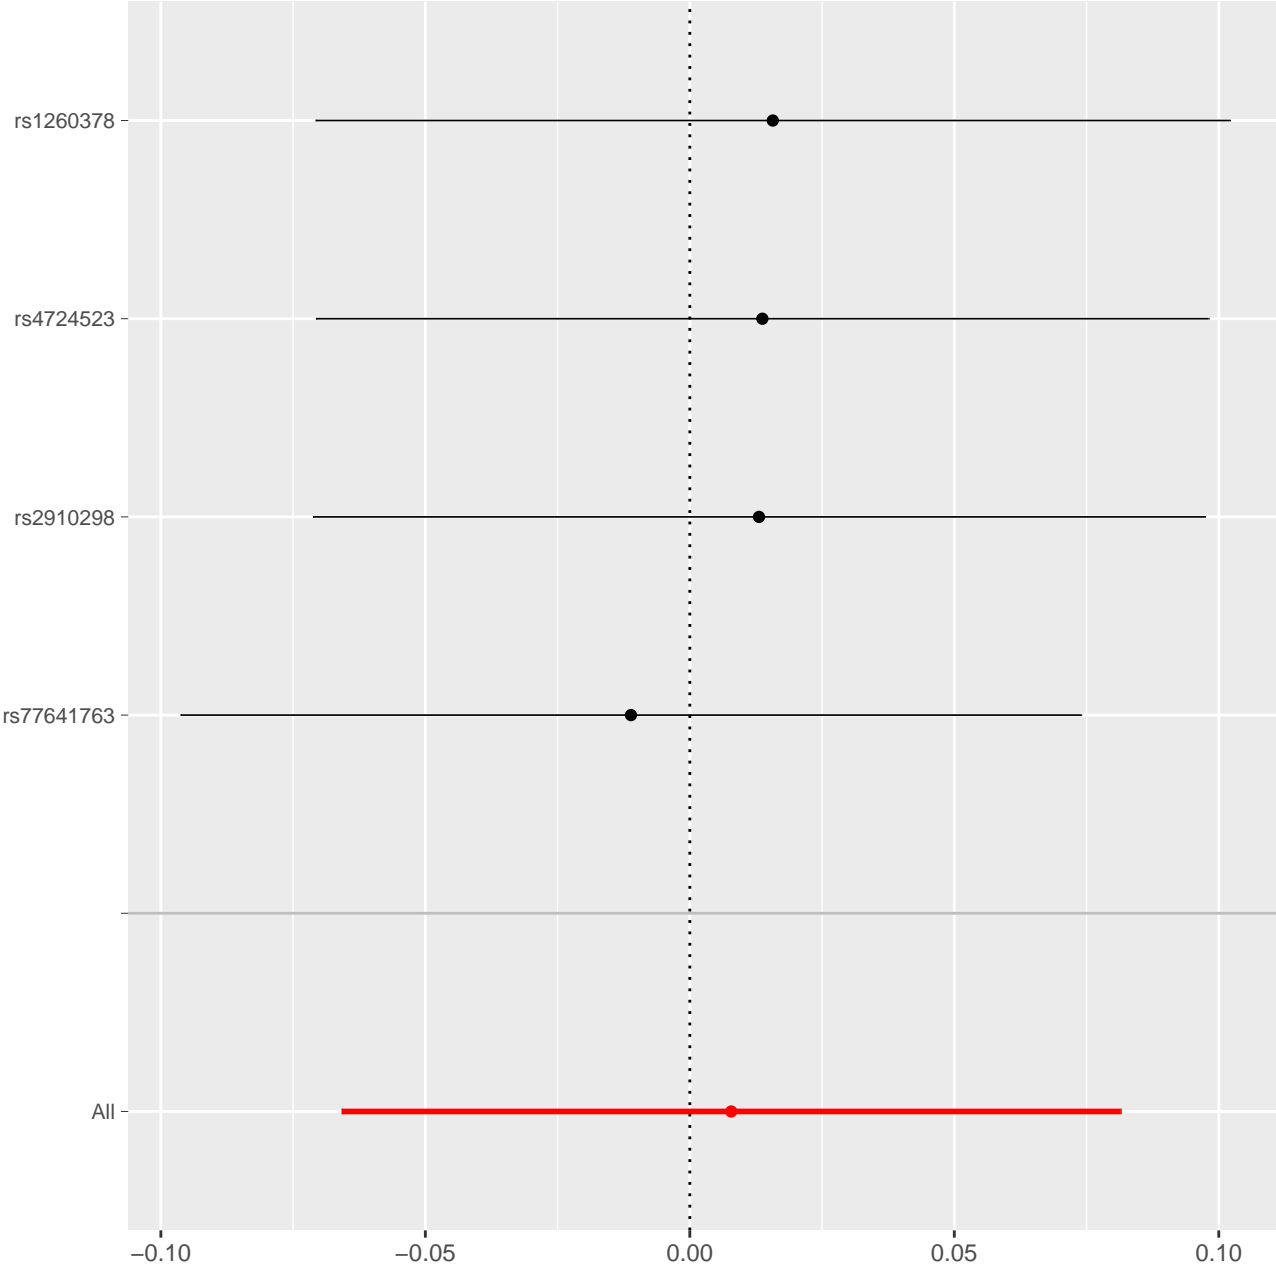

'Pain type(s) experienced in last month: Hip pain || id:ukb-b-7289' on 'Non-cancer illness code self-reported: anxiety/panic attacks || id:ukb-b-7289'

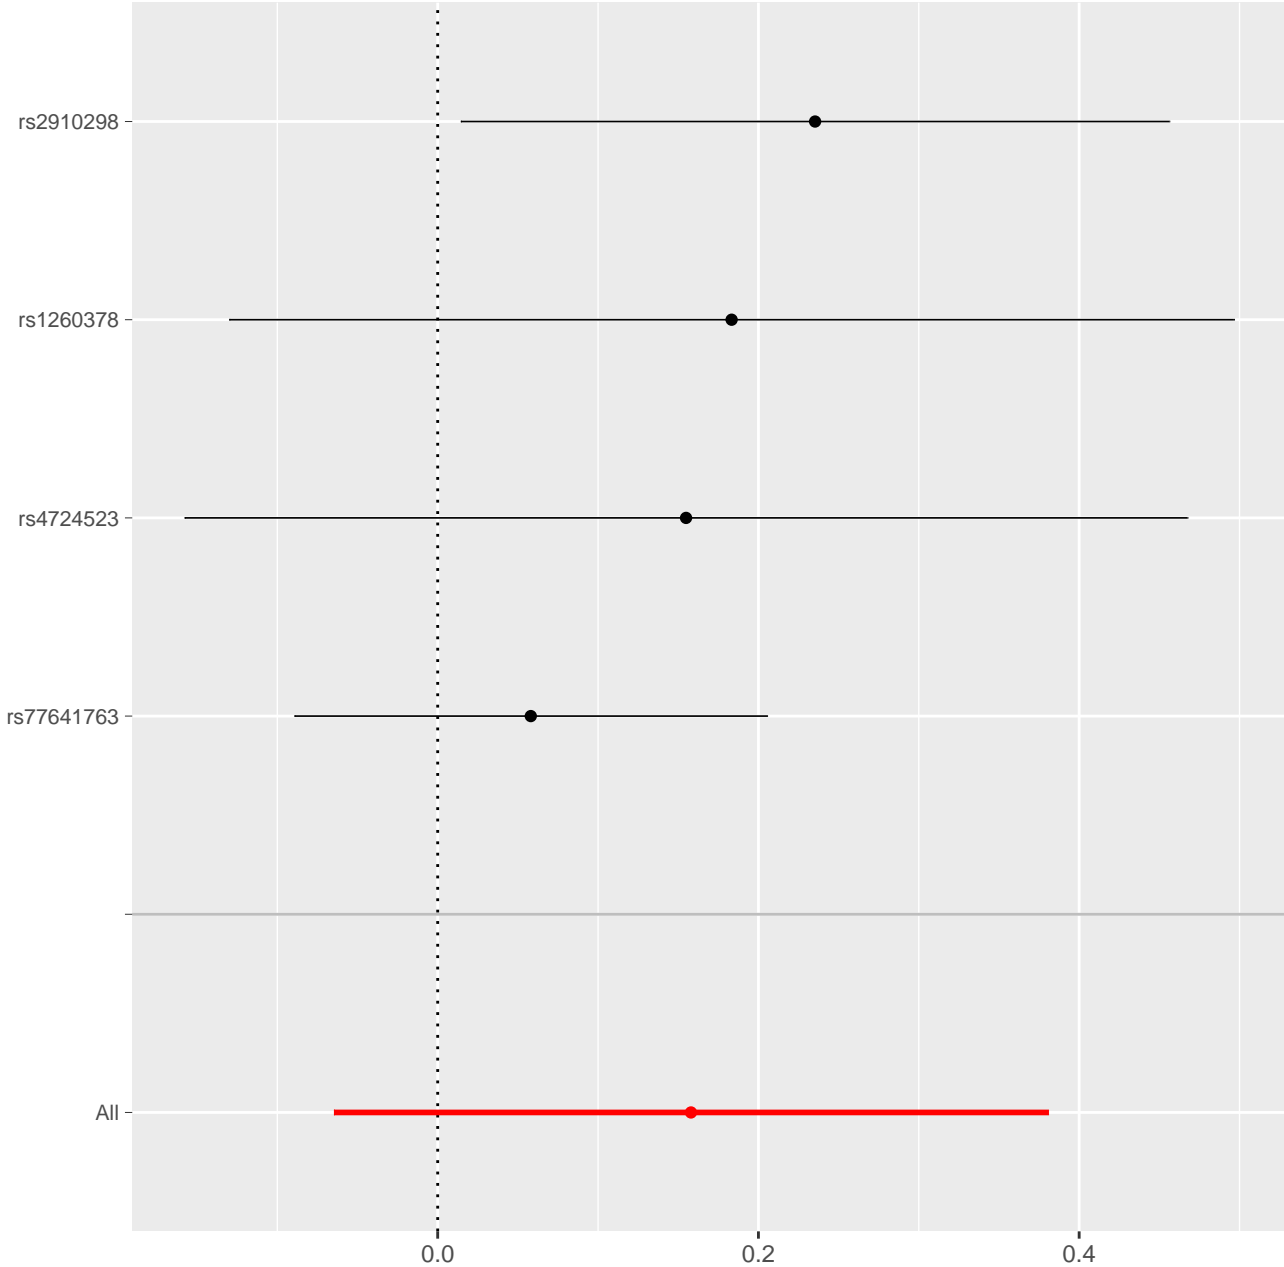

MR leave-one-out sensitivity analysis for 'Pain type(s) experienced in last month: Hip pain || id:ukb-b-7289' on 'Non-cancer illness code, self-reported: depression || id:ukb-b-7289'

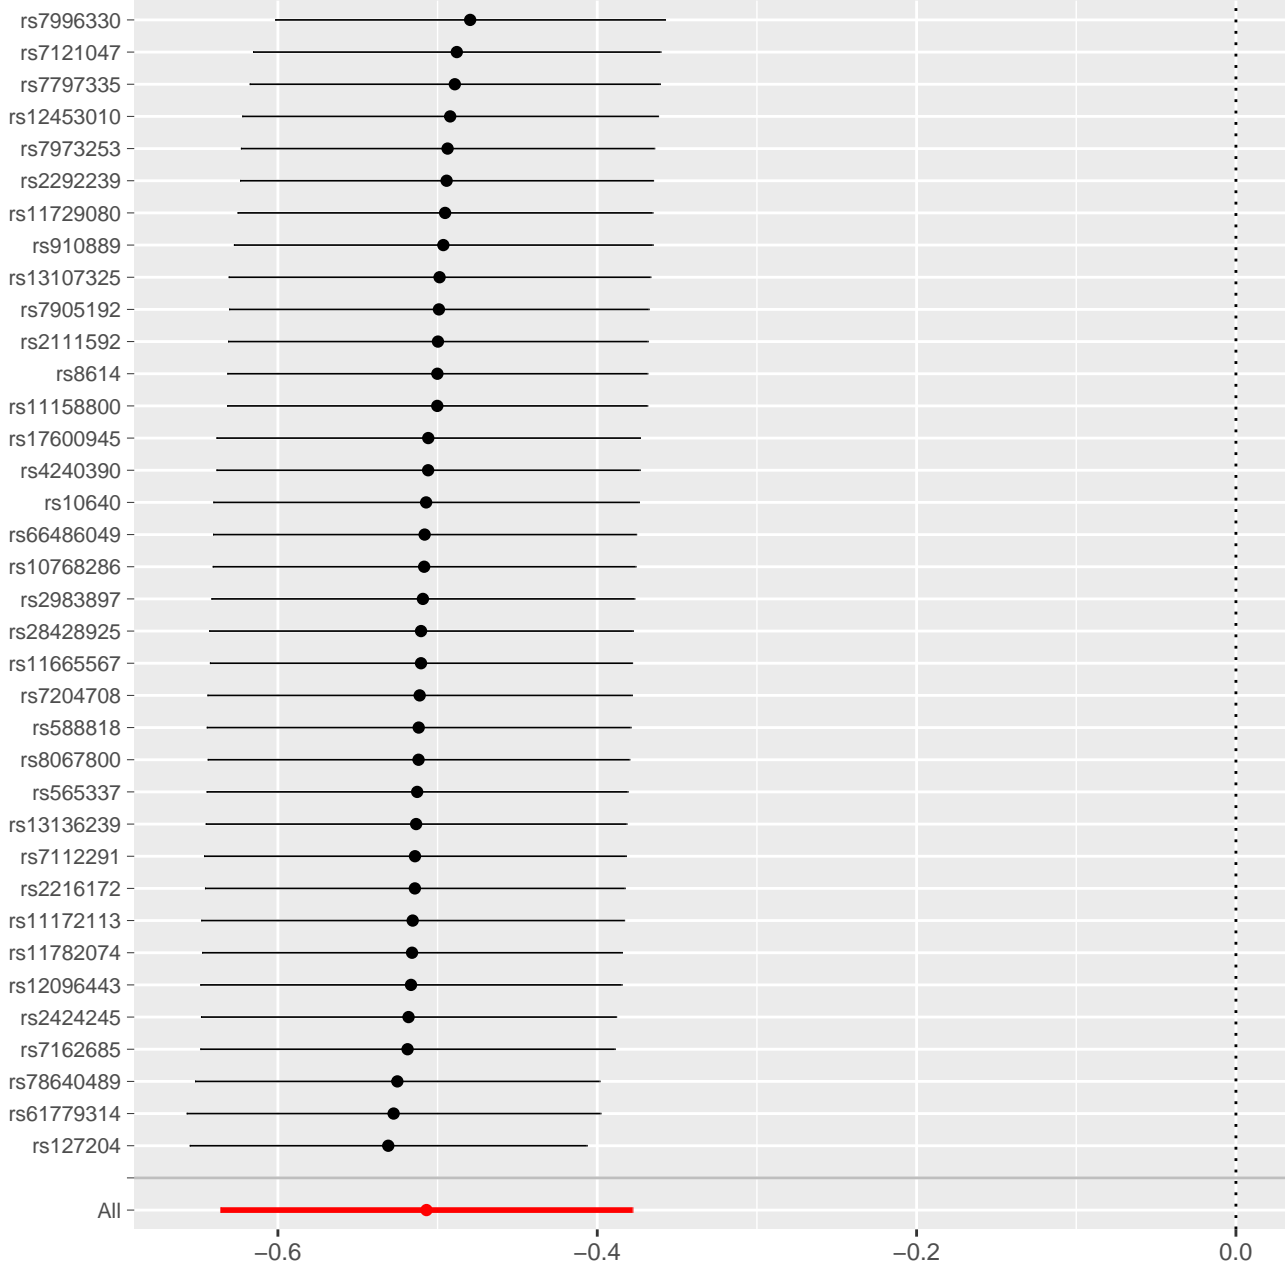

MR leave-one-out sensitivity analysis for 'Pain type(s) experienced in last month: None of the above || id:ukb-b-9130' on 'Sleeplessness / insomnia || id:ukb-a-13'

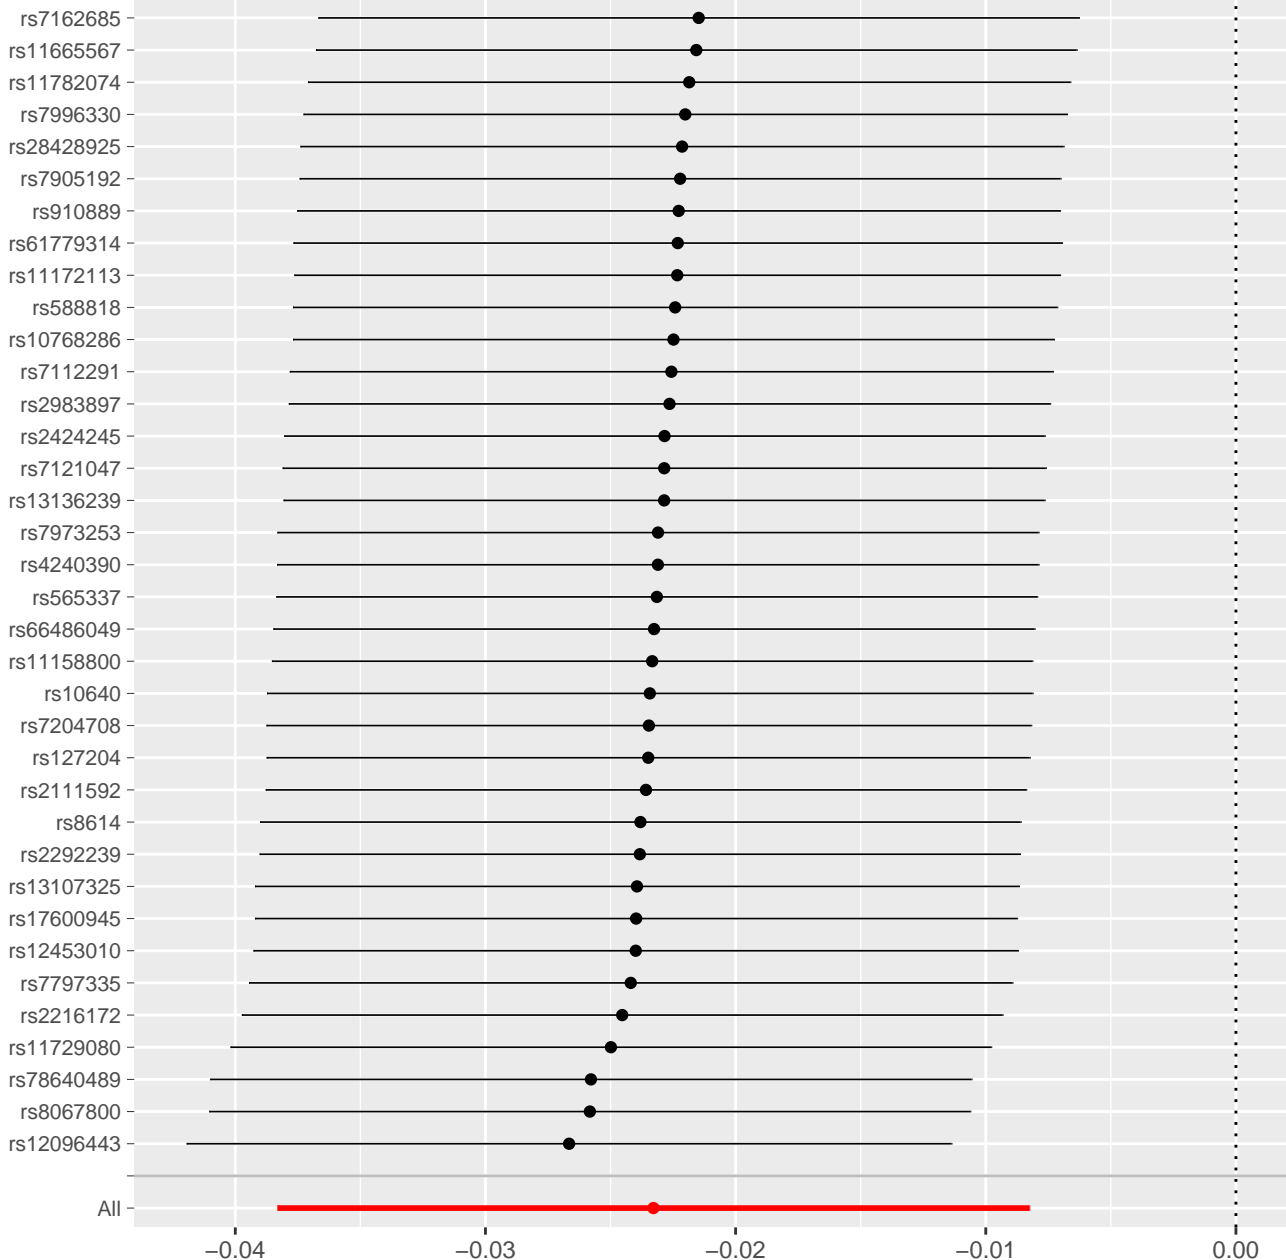

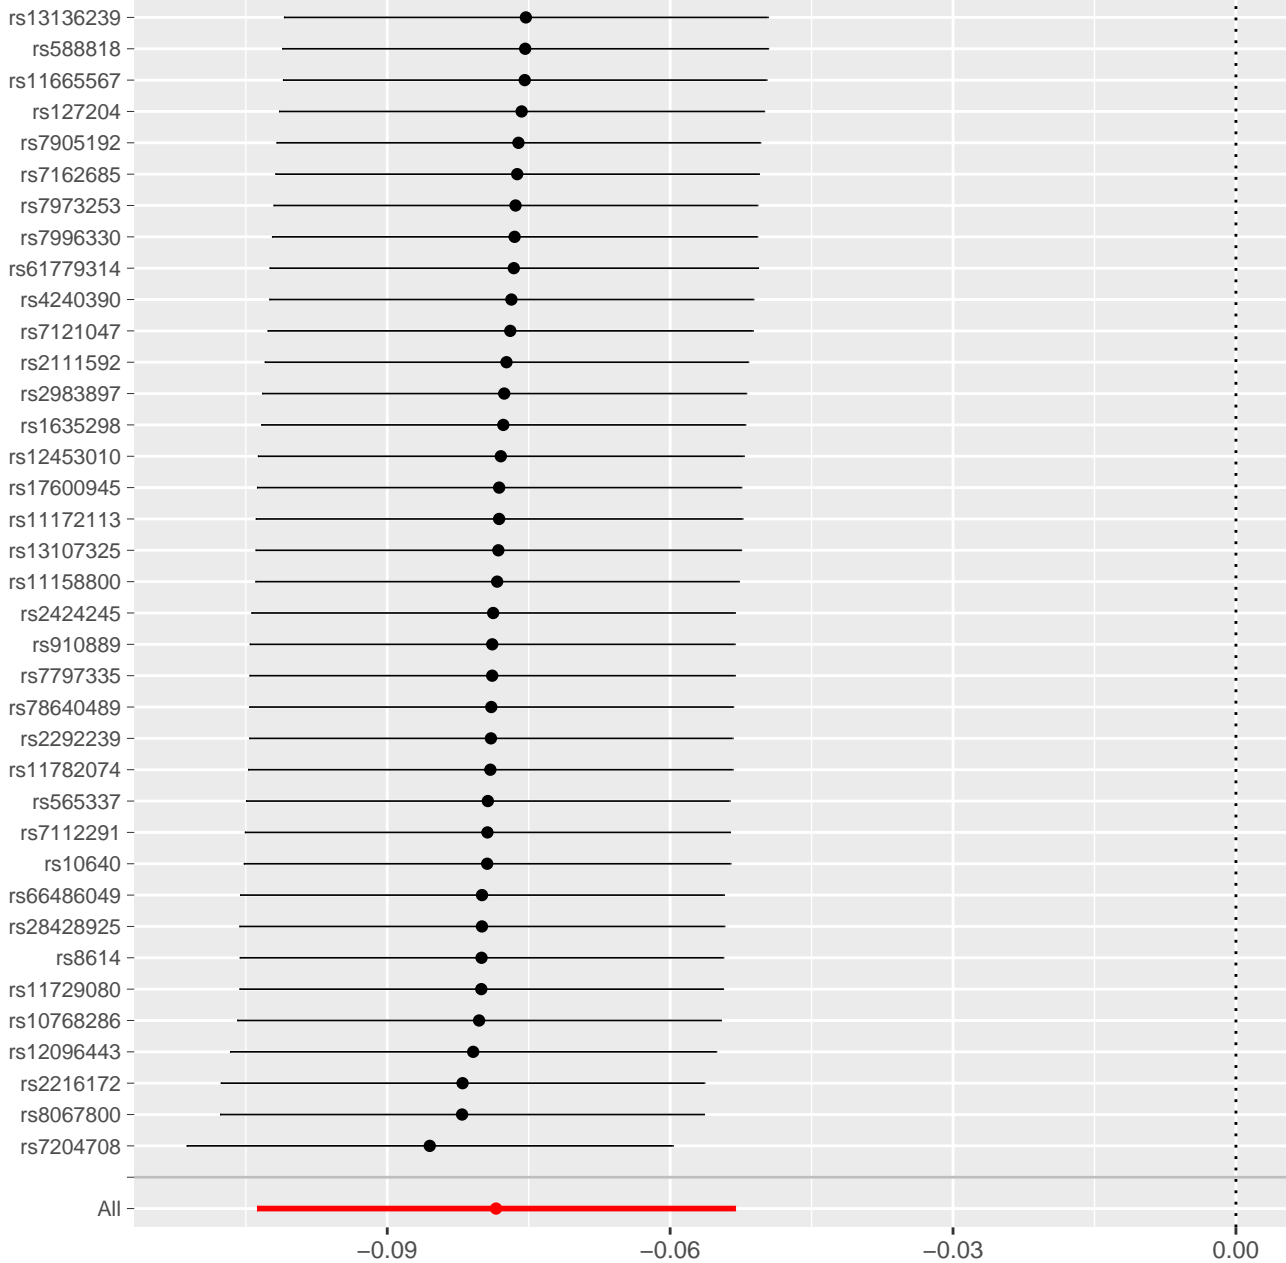

'Pain type(s) experienced in last month: None of the above || id:ukb-b-9130' on 'Non-cancer illness code, self-reported: depression || id:ukb-b-9130'

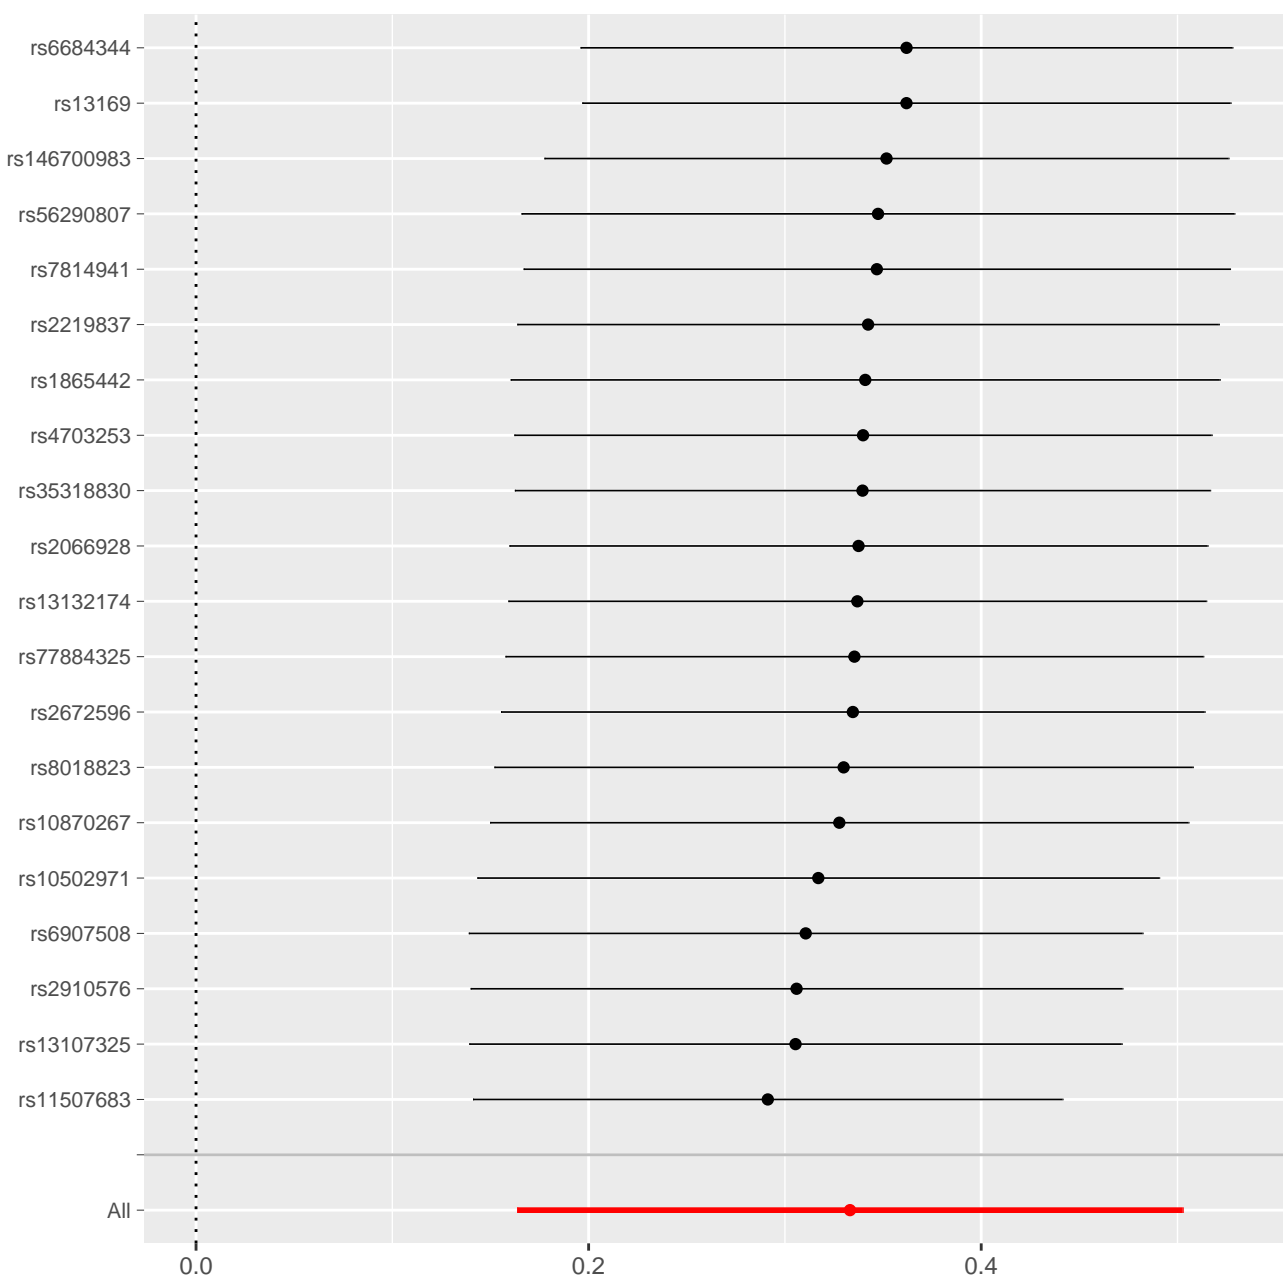

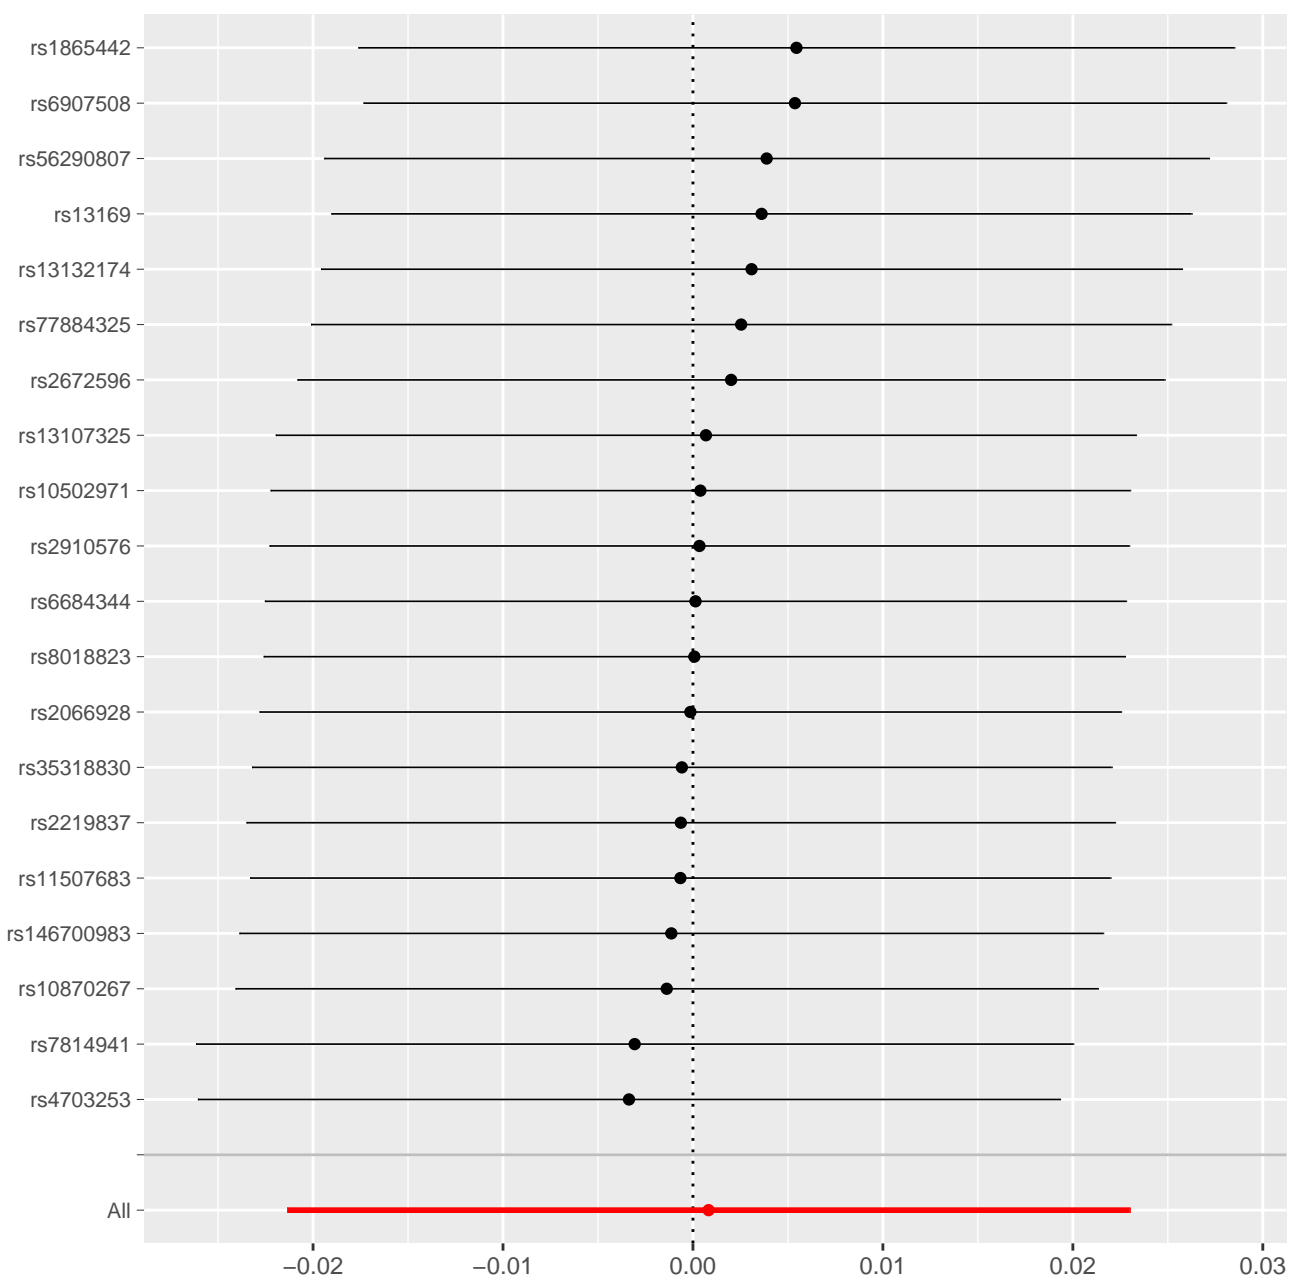

MR leave-one-out sensitivity analysis for 'Pain type(s) experienced in last month: Back pain || id:ukb-b-9838' on 'Non-cancer illness code self-reported: anxiety/panic attacks || id:ukb-b-9838'



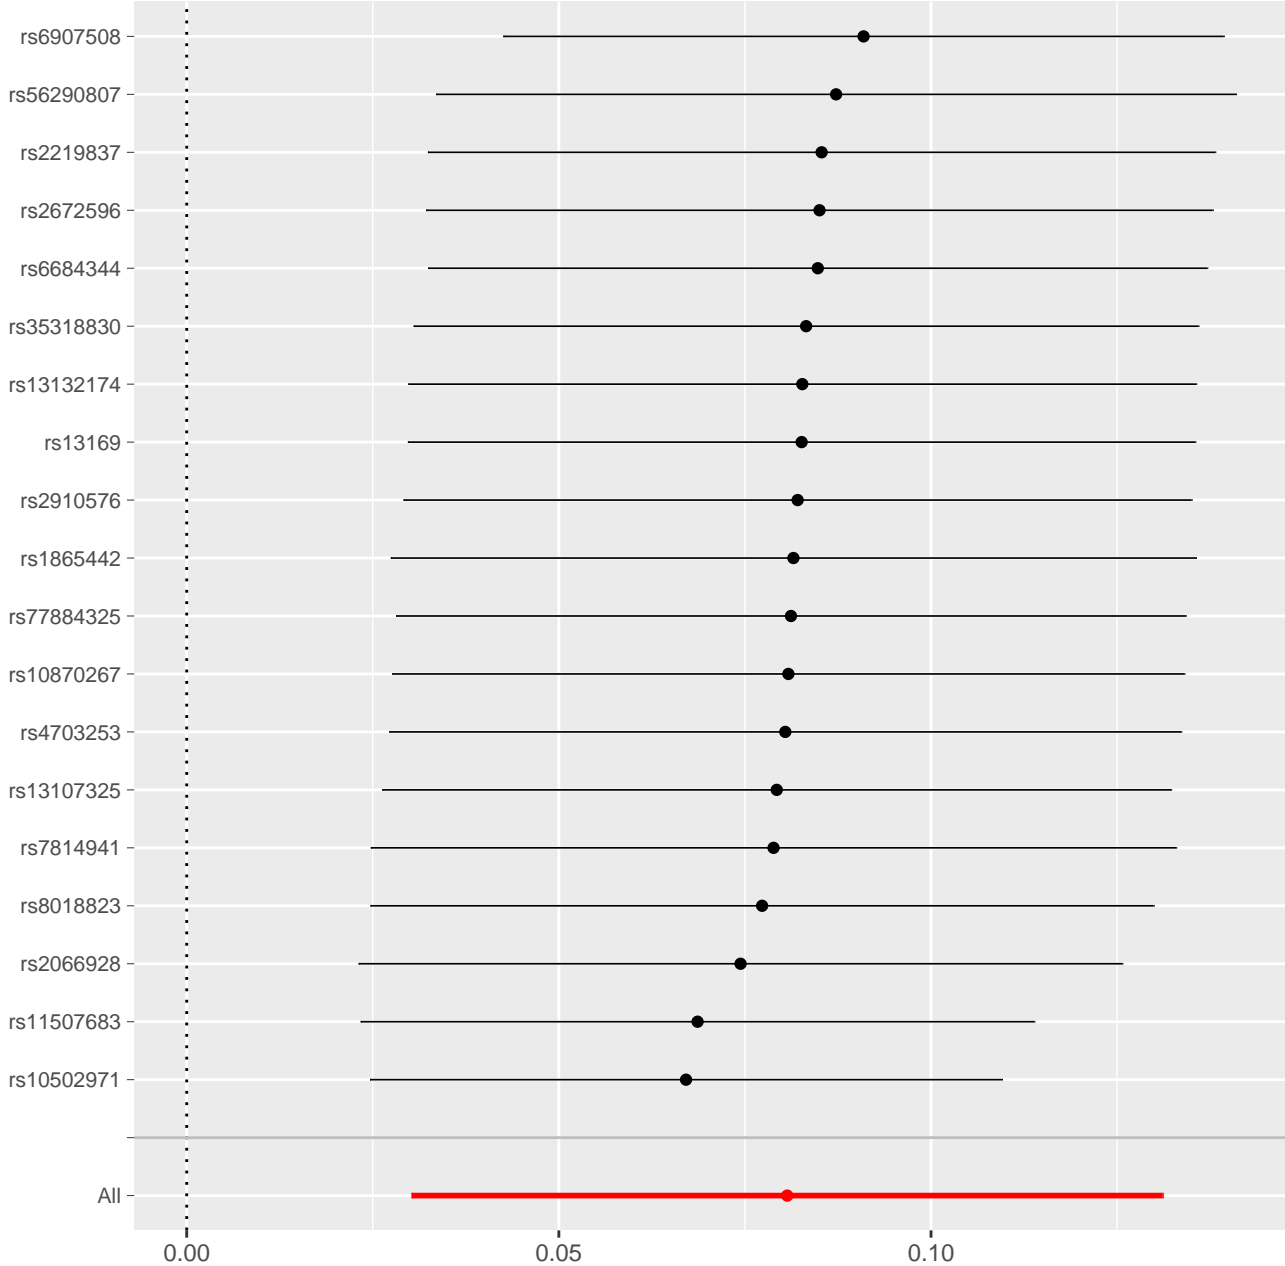

'Pain type(s) experienced in last month: Back pain || id:ukb-b-9838' on 'Non-cancer illness code, self-reported: depression || id:ukb-b-9838'

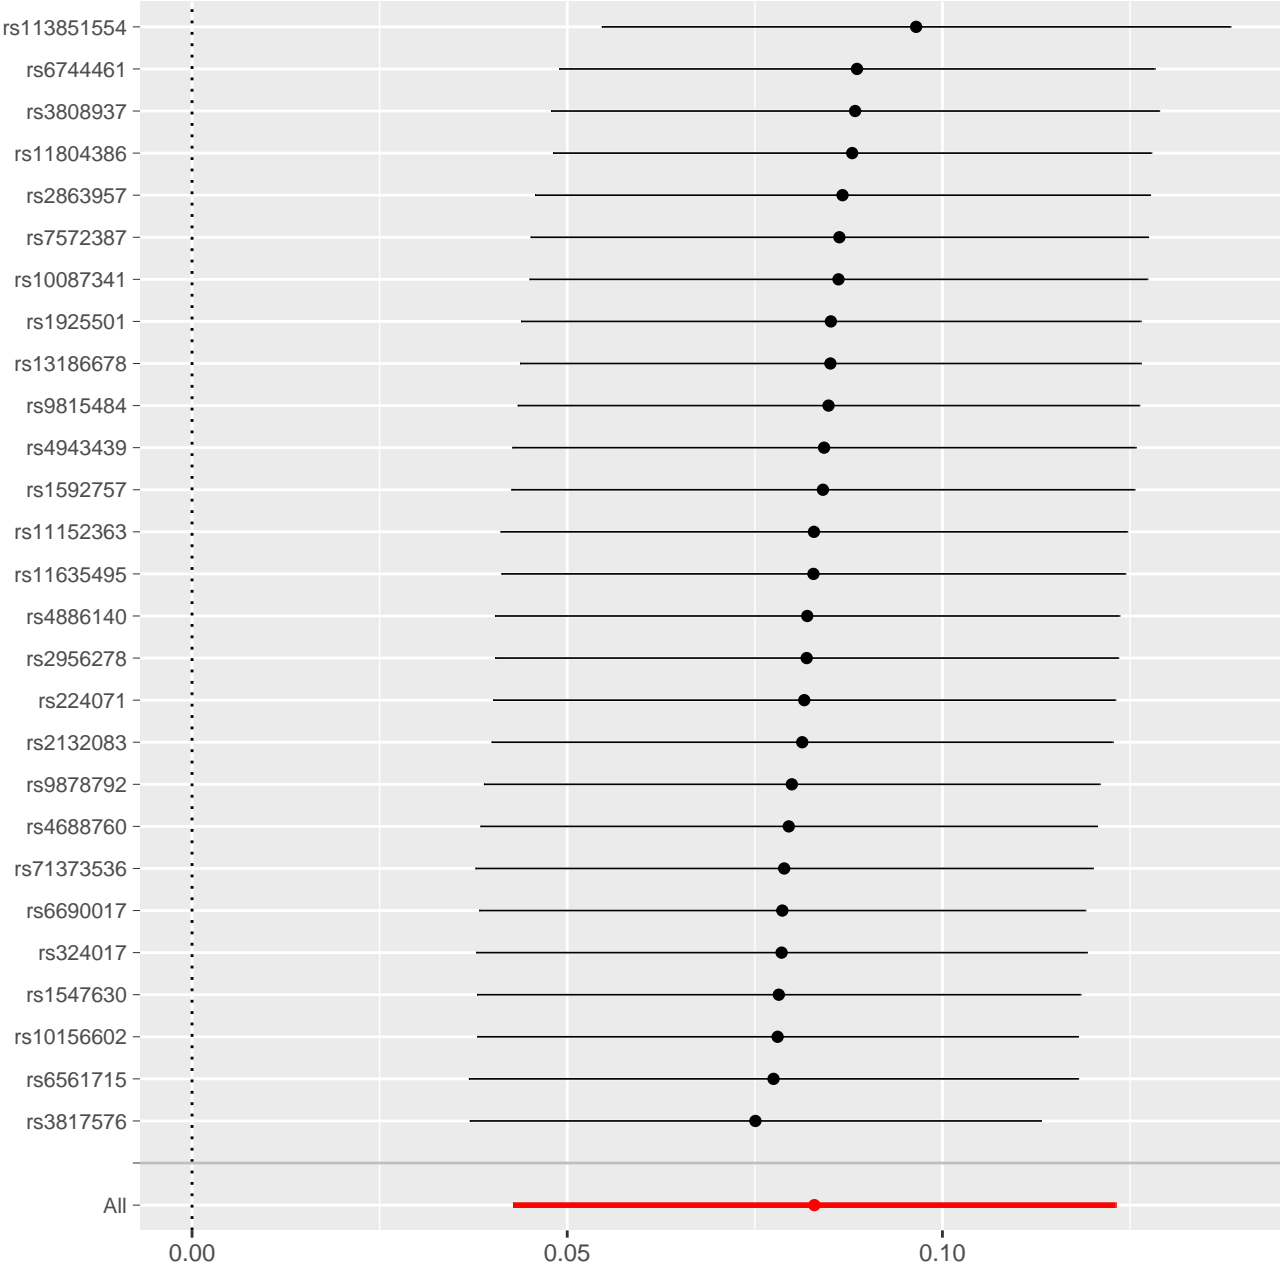

MR leave-one-out sensitivity analysis for 'Sleeplessness / insomnia || id:ukb-a-13' on 'Pain type(s) experienced in last month: Knee pain || id:ukb-b-16254'

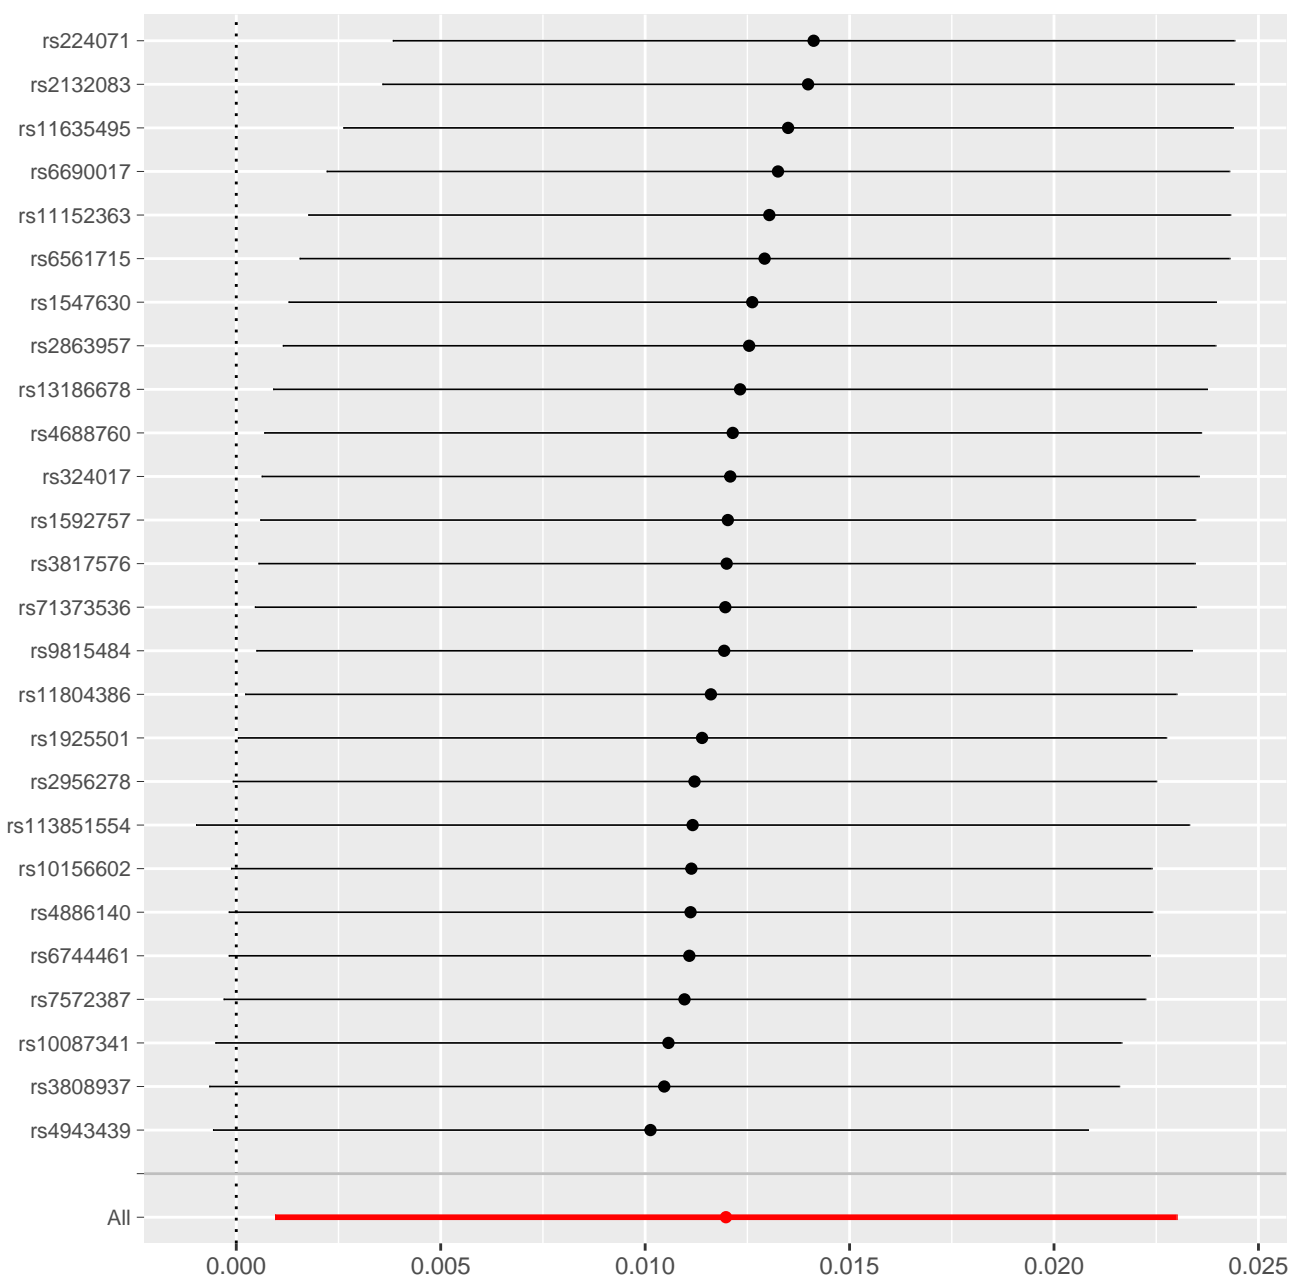

MR leave-one-out sensitivity analysis for 'Sleeplessness / insomnia || id:ukb-a-13' on 'Pain type(s) experienced in last month: Facial pain || id:ukb-b-17107'

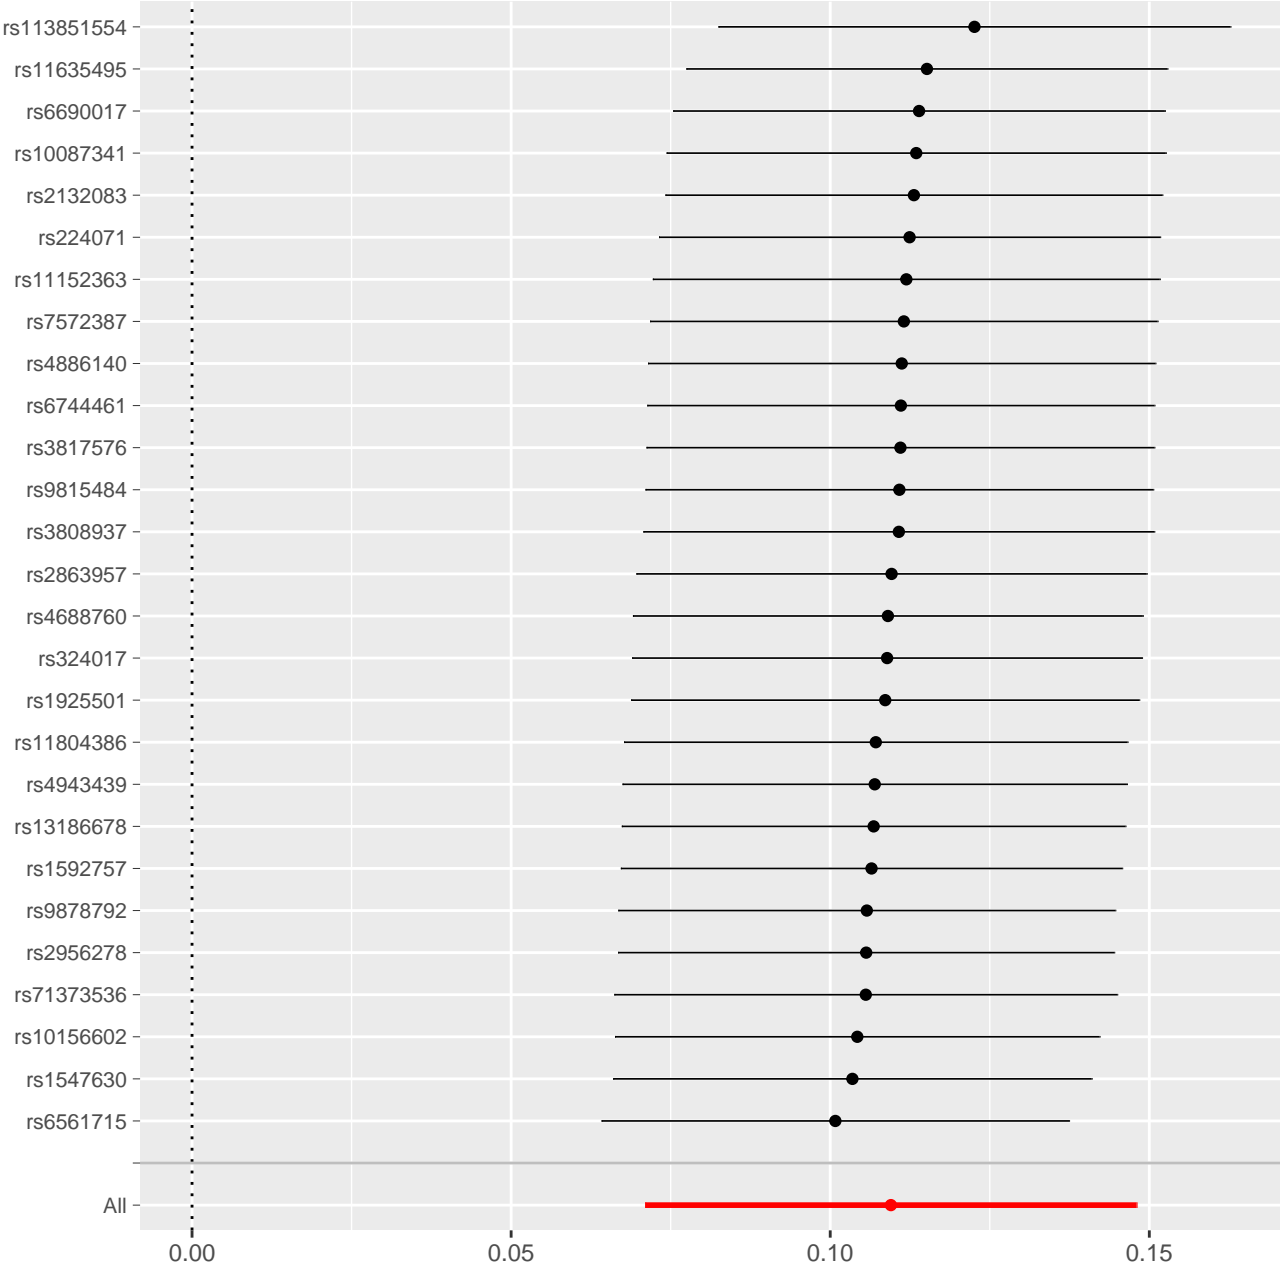

MR leave-one-out sensitivity analysis for 'Sleeplessness / insomnia || id:ukb-a-13' on 'Pain type(s) experienced in last month: Neck or shoulder pain || id:ukb-b-18596'

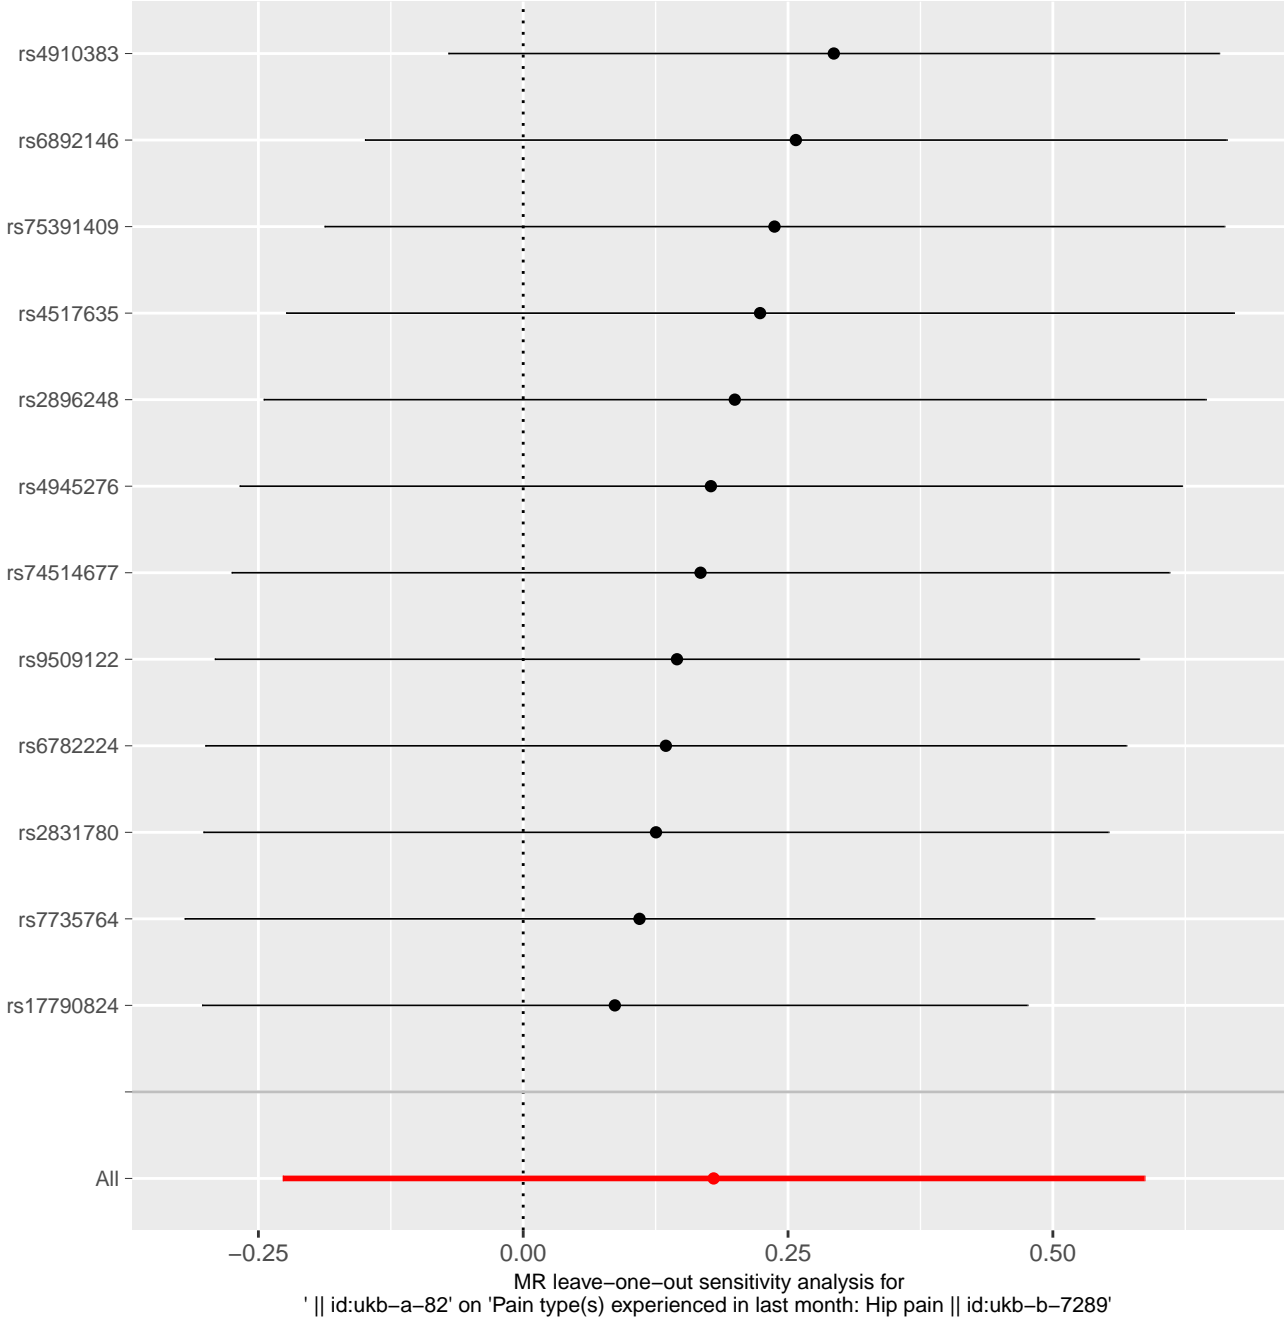

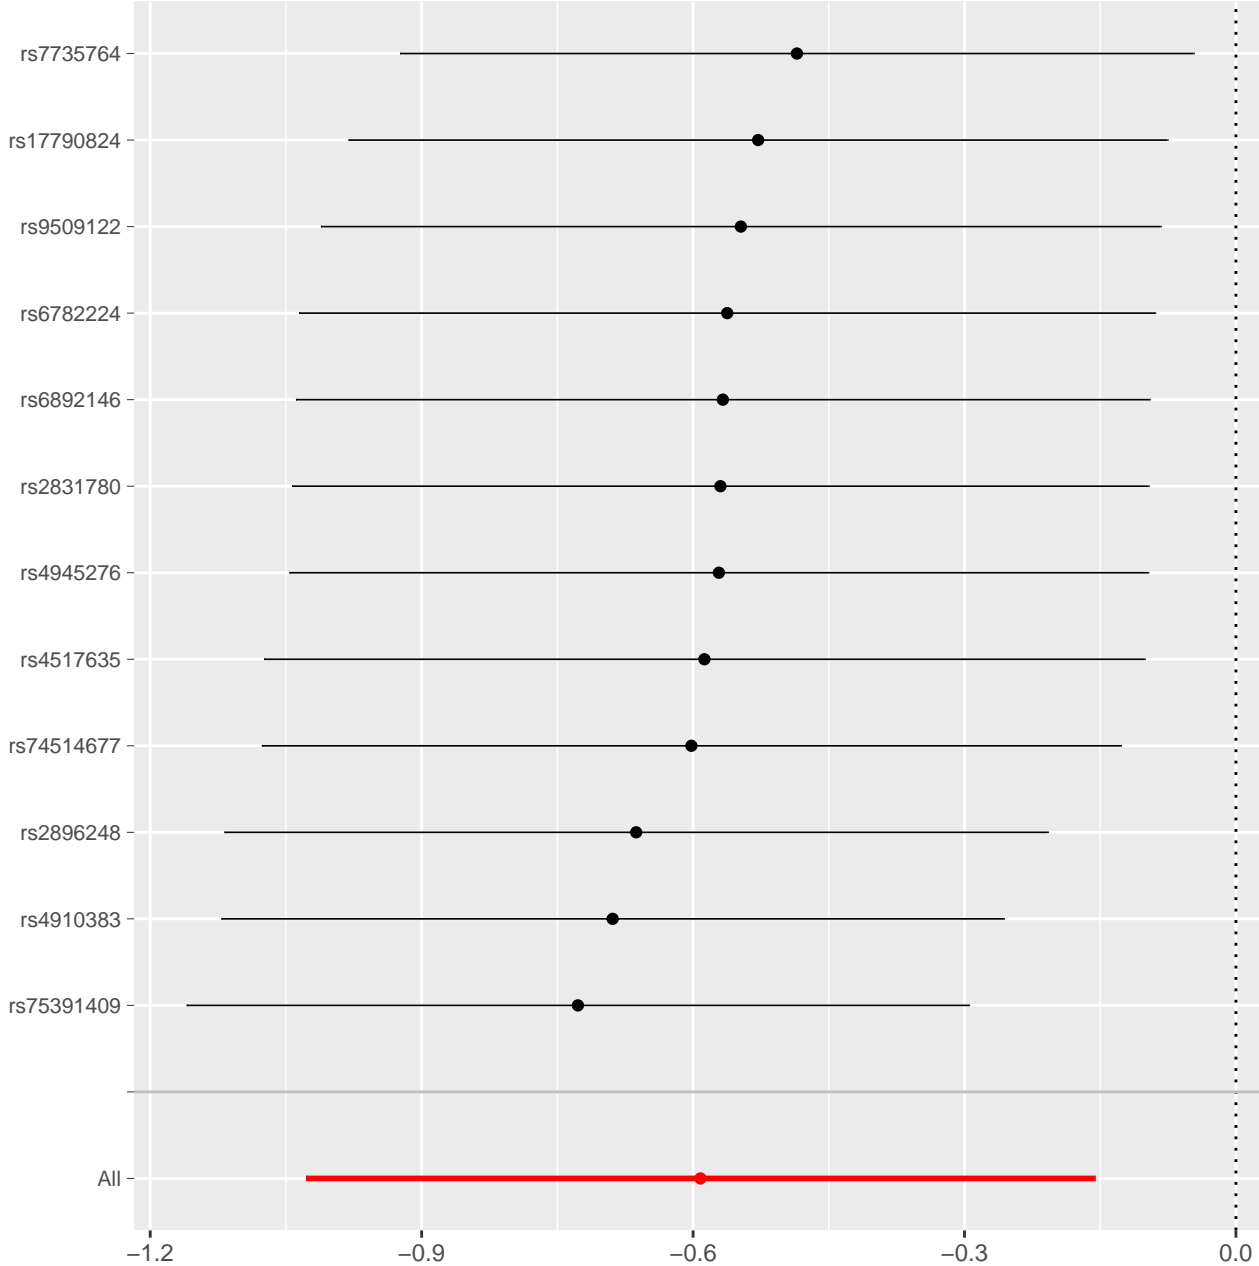

MR leave-one-out sensitivity analysis for ' || id:ukb-a-82' on 'Pain type(s) experienced in last month: None of the above || id:ukb-b-9130'

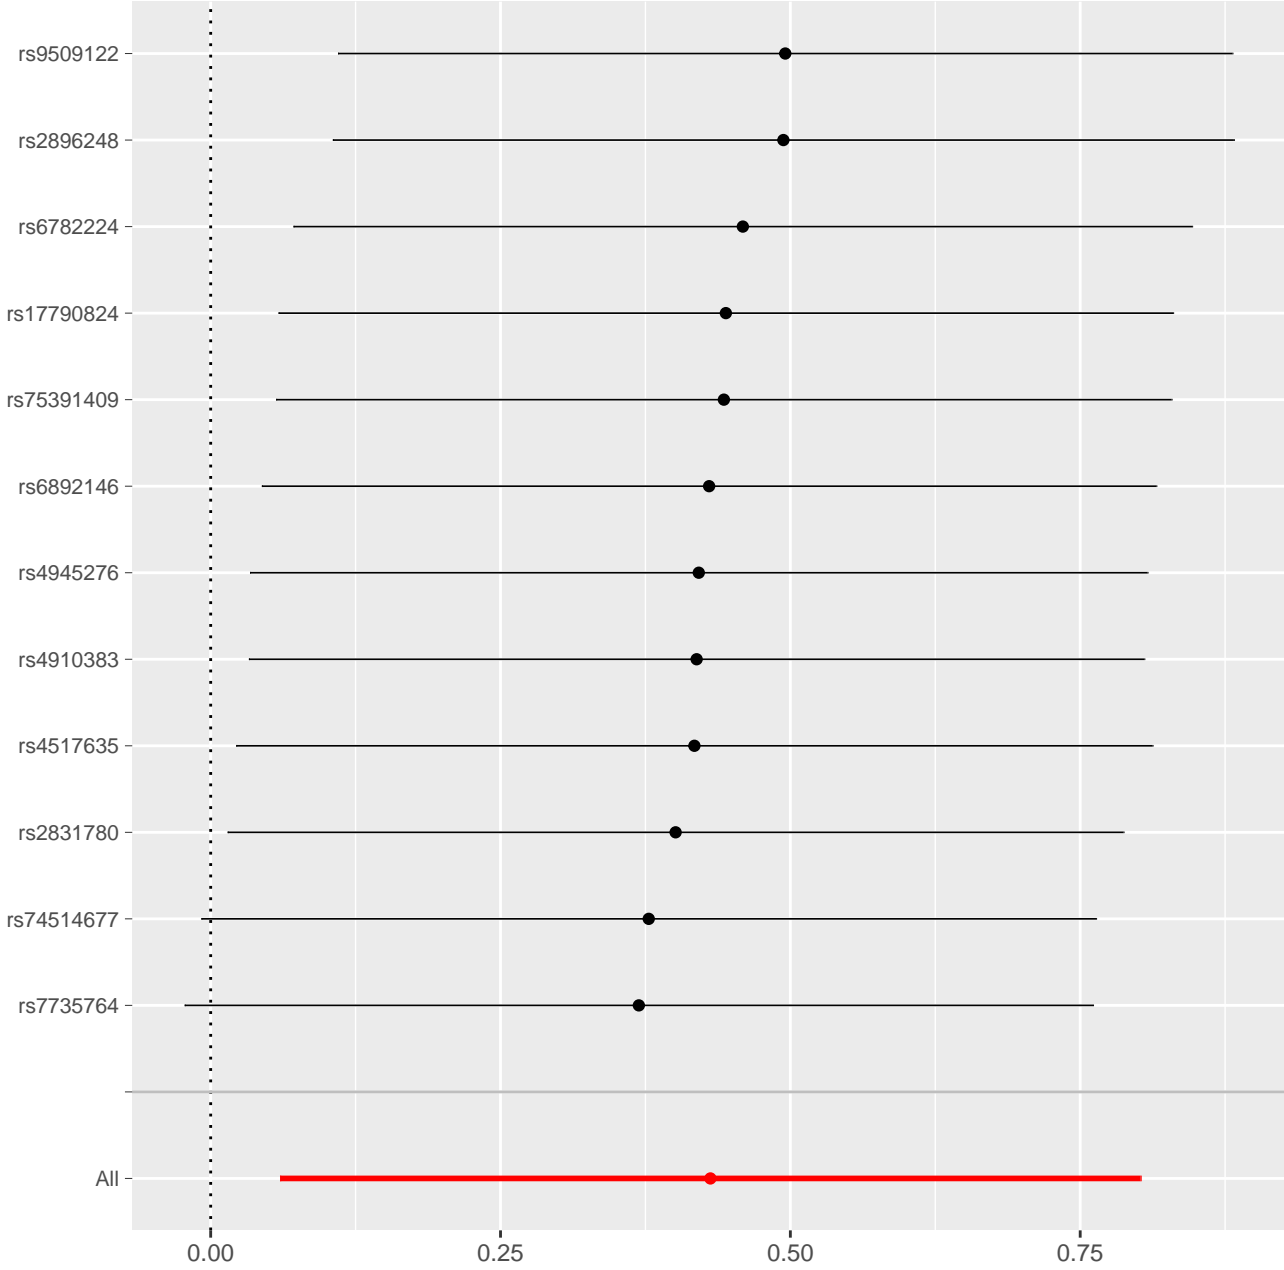

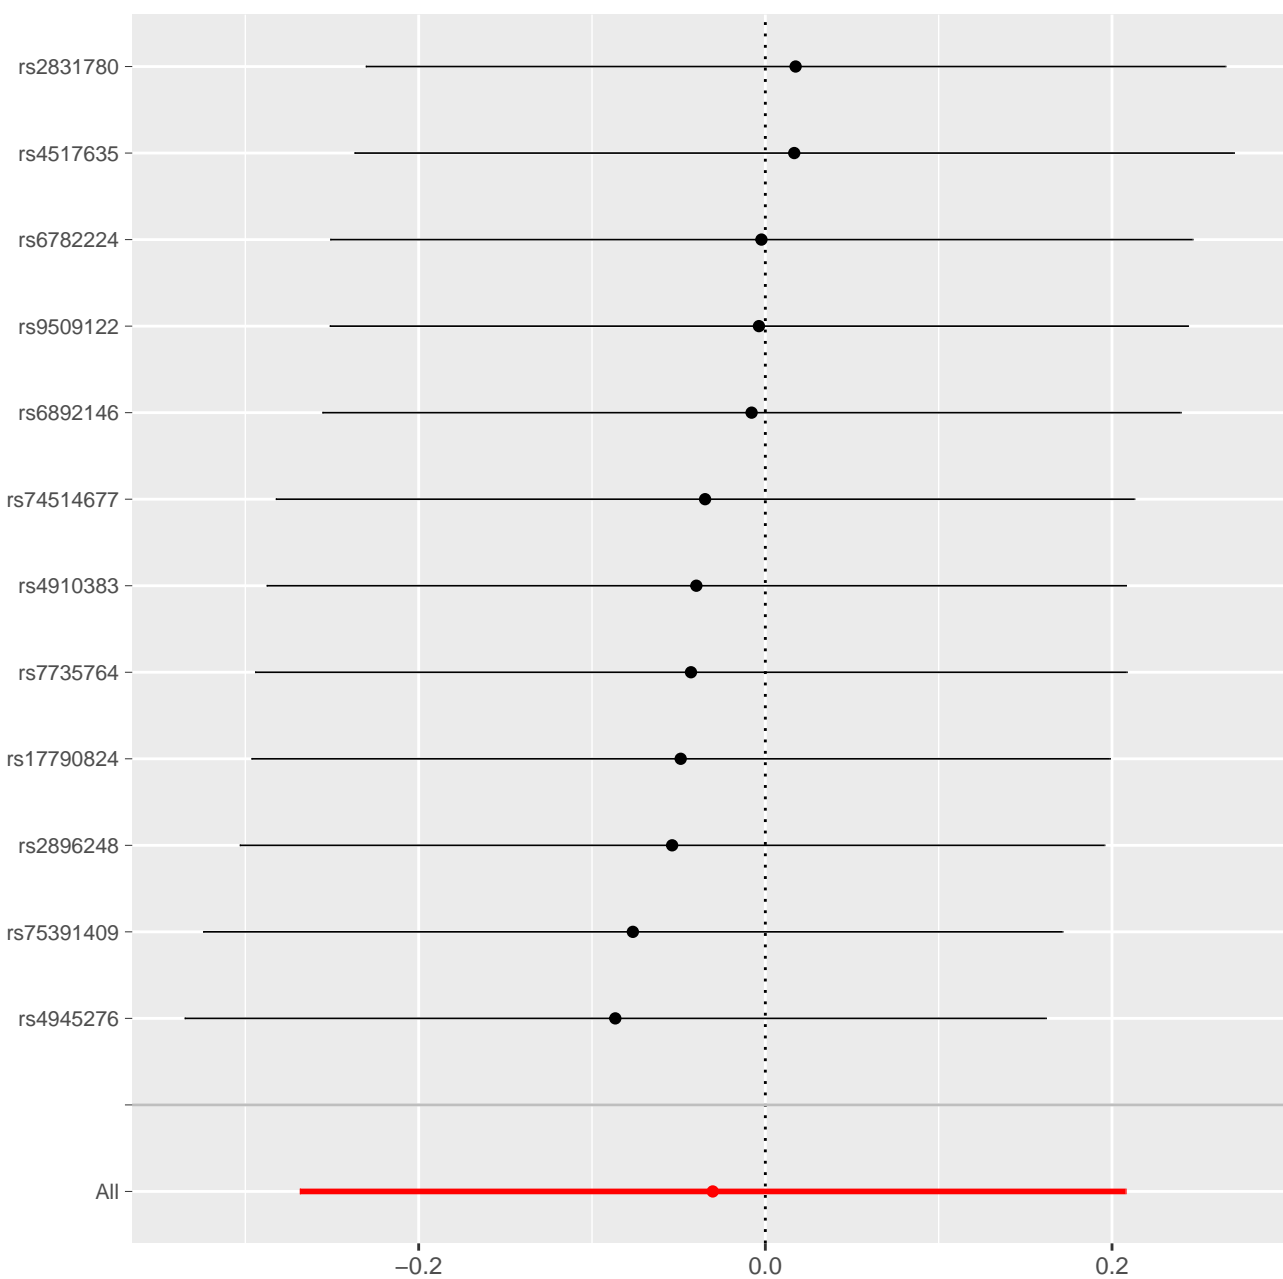

' || id:ukb-a-82' on 'Pain type(s) experienced in last month: Stomach or abdominal pain || id:ukb-b-11413'



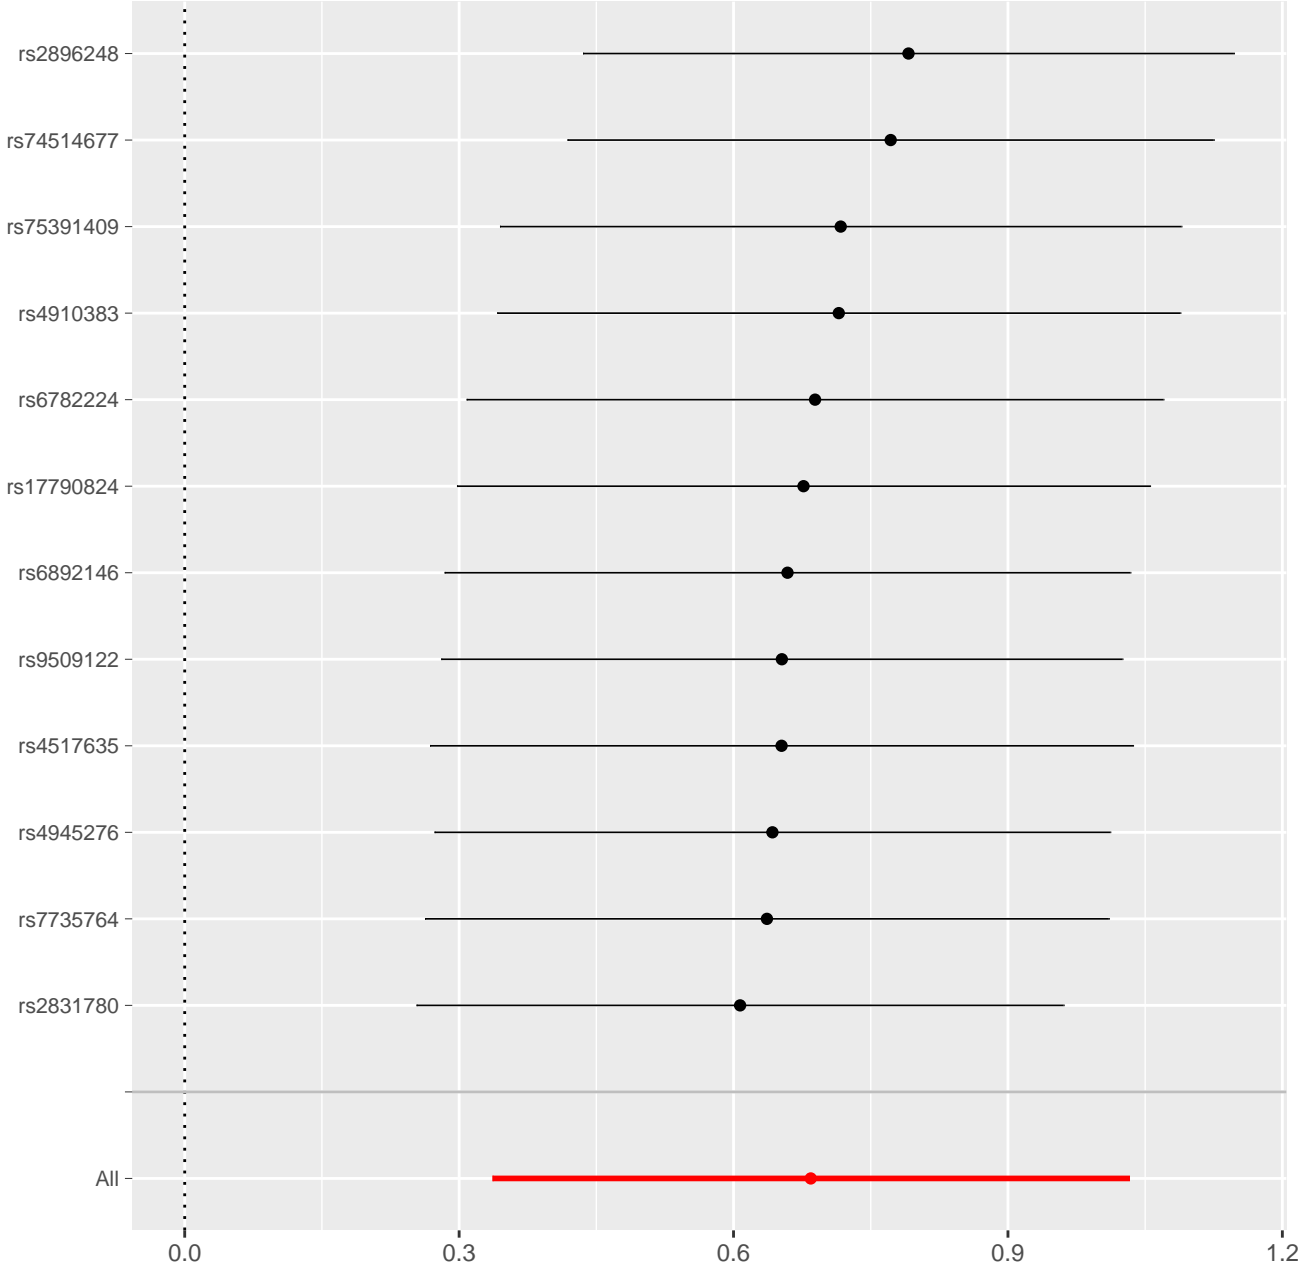

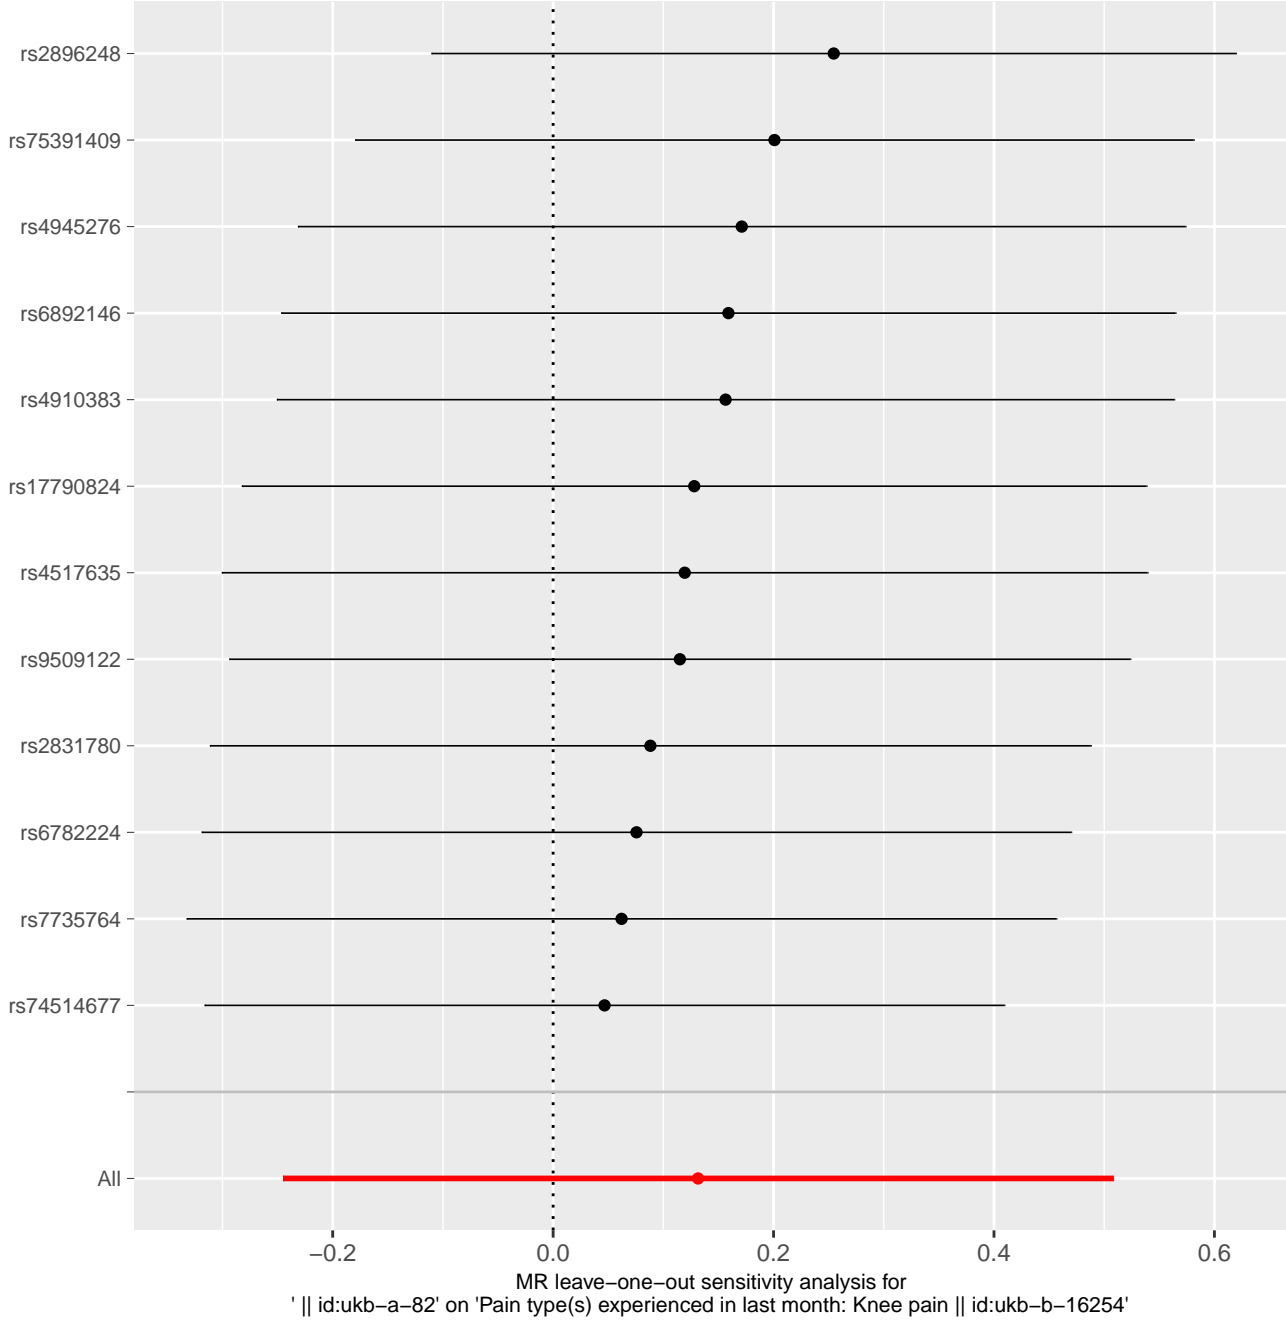

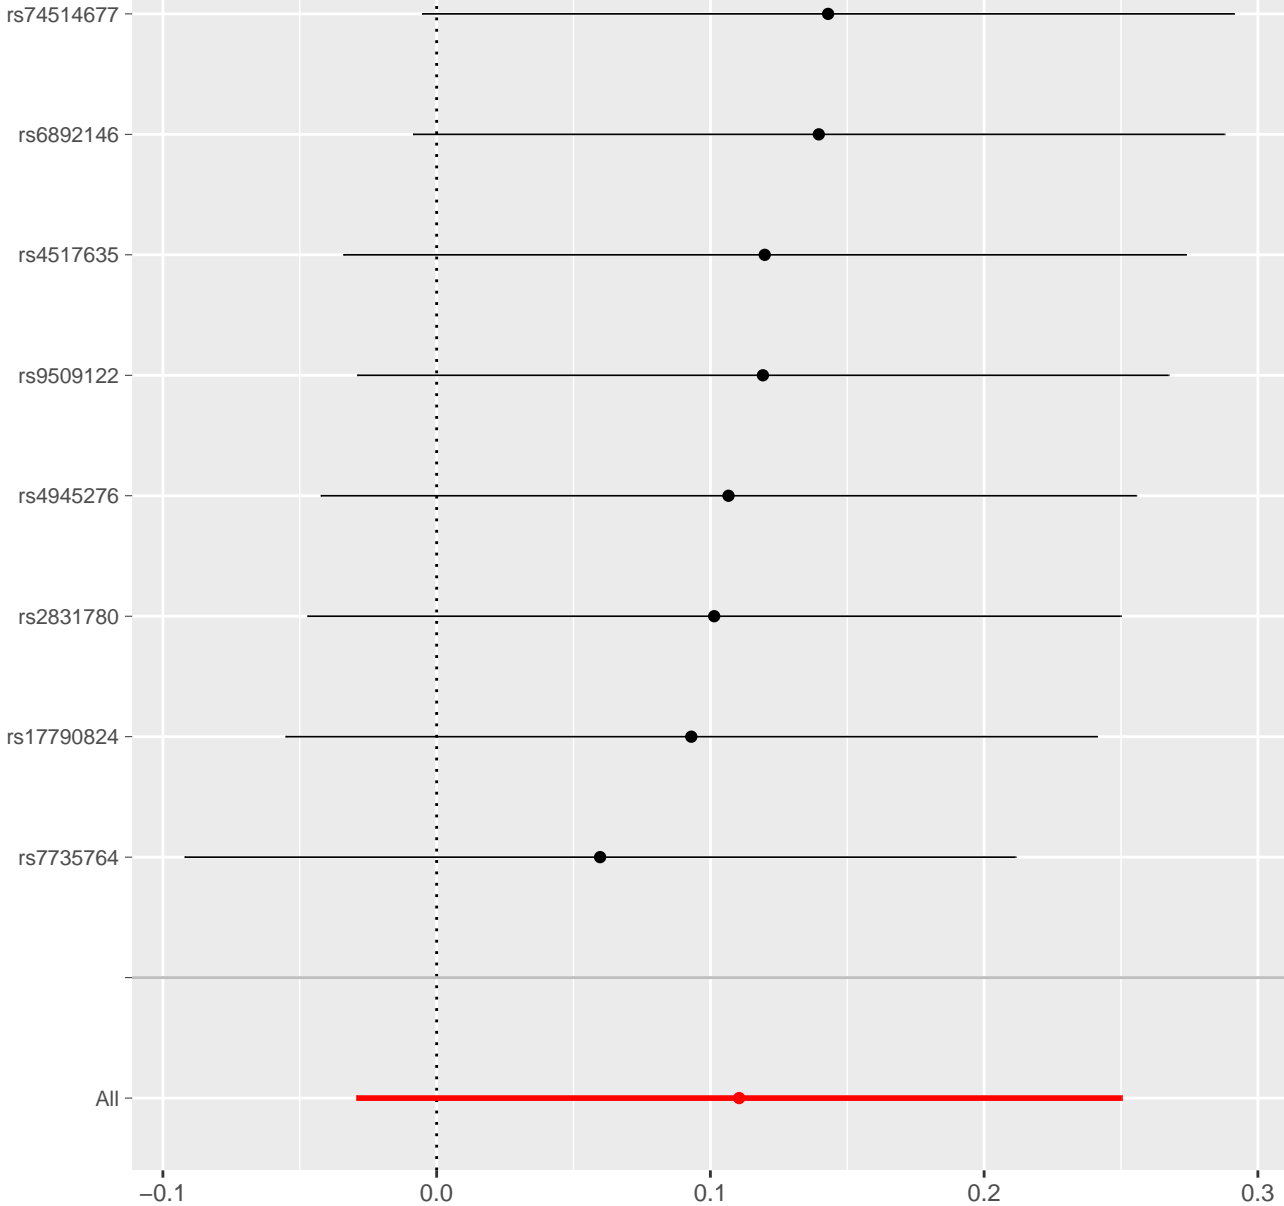

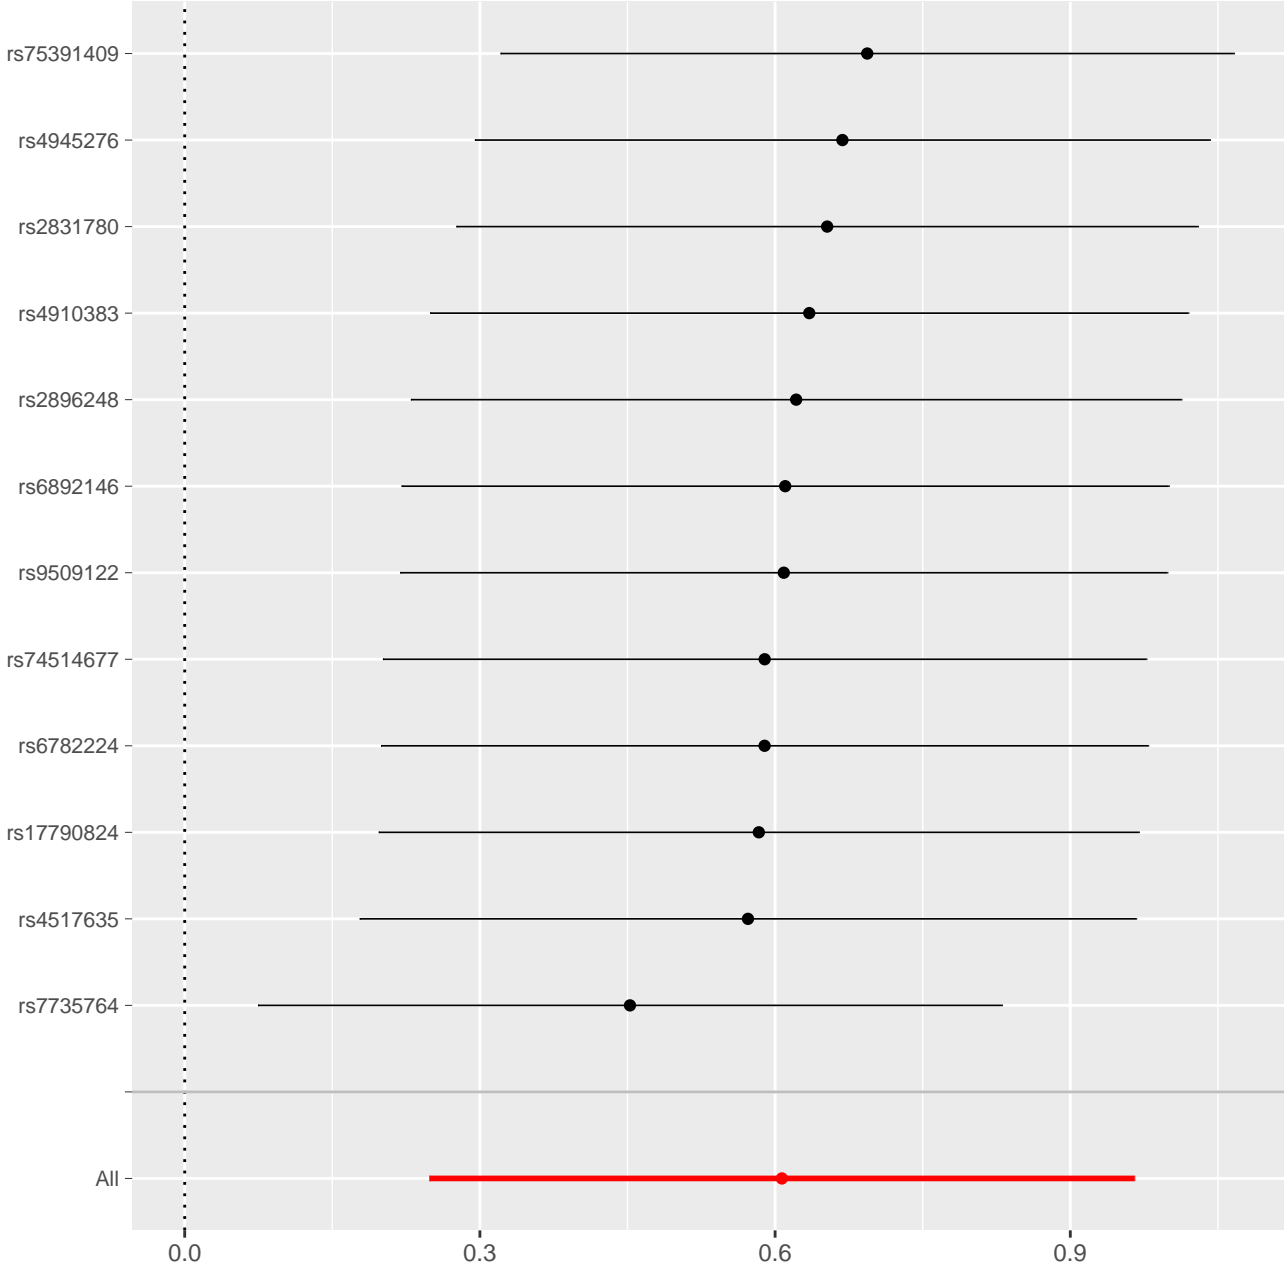

MR leave-one-out sensitivity analysis for ' || id:ukb-a-82' on 'Pain type(s) experienced in last month: Neck or shoulder pain || id:ukb-b-18596'

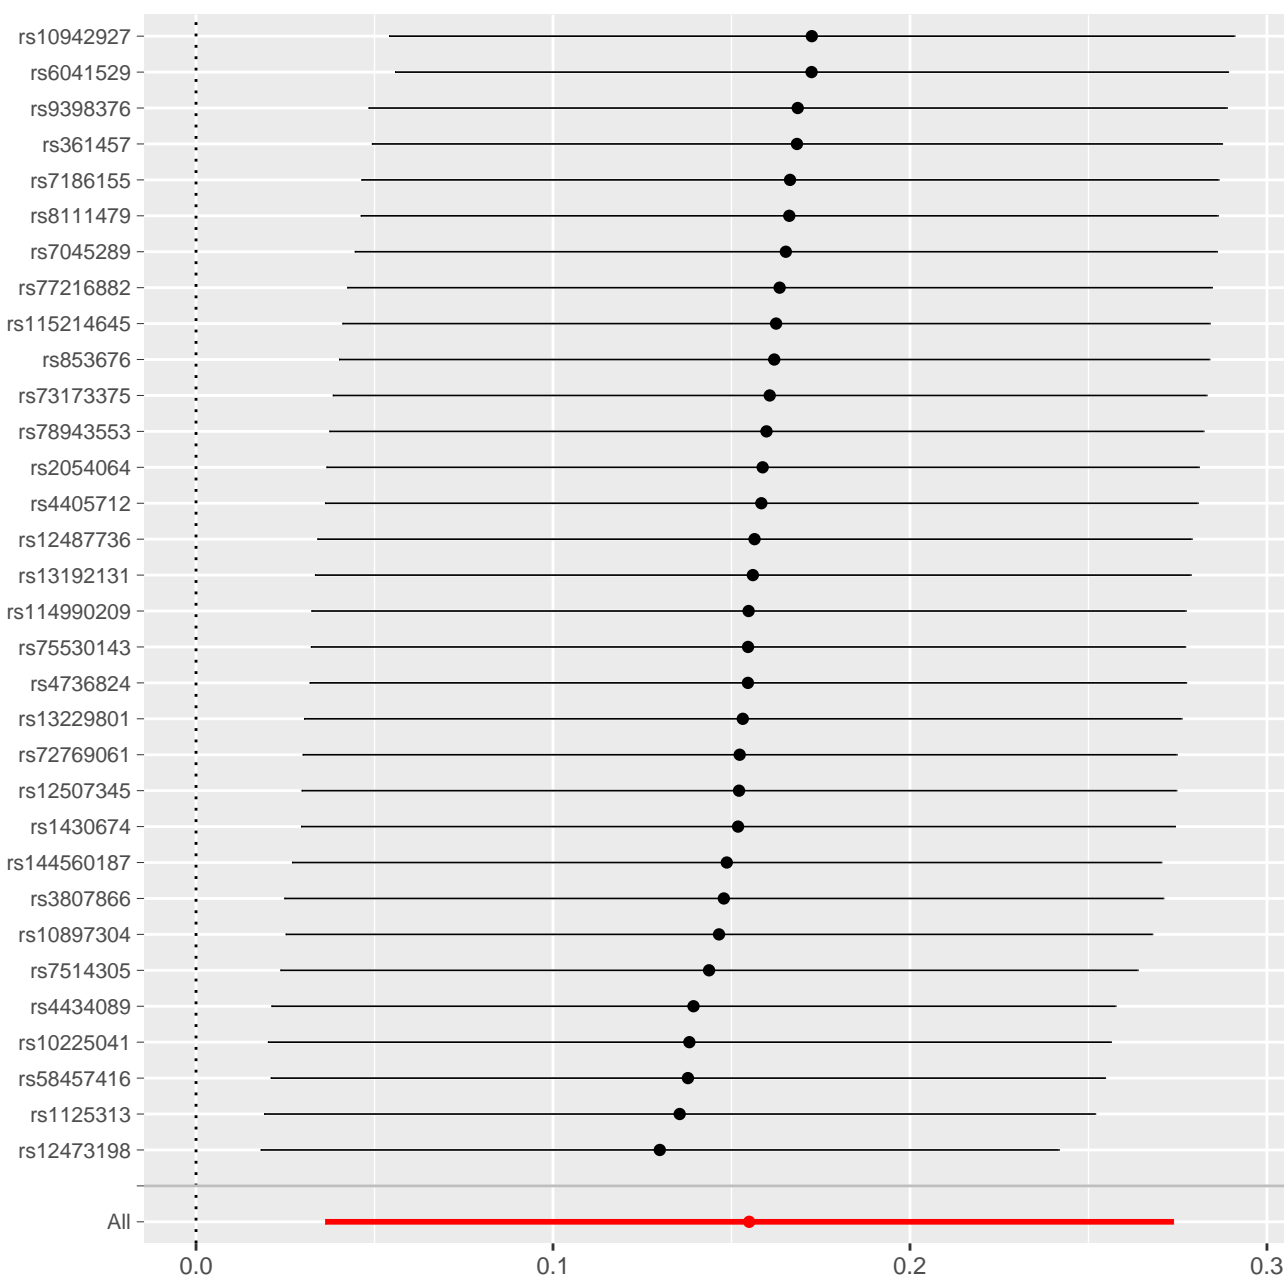

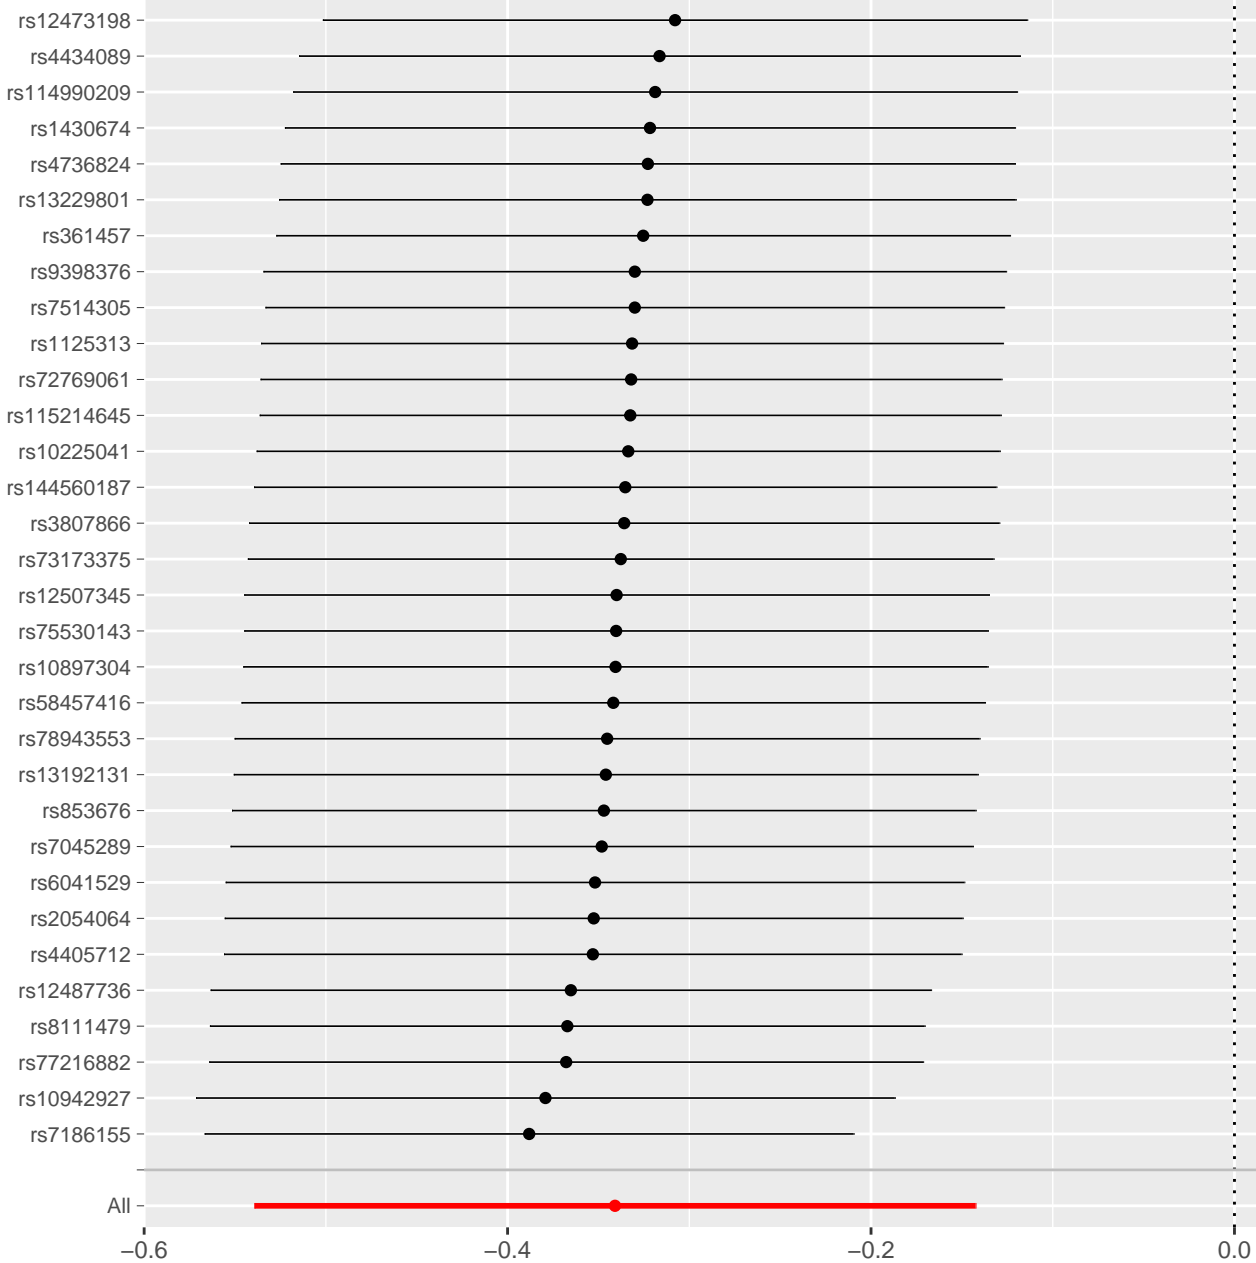

MR leave-one-out sensitivity analysis for ' || id:ukb-b-12064' on 'Pain type(s) experienced in last month: None of the above || id:ukb-b-9130'

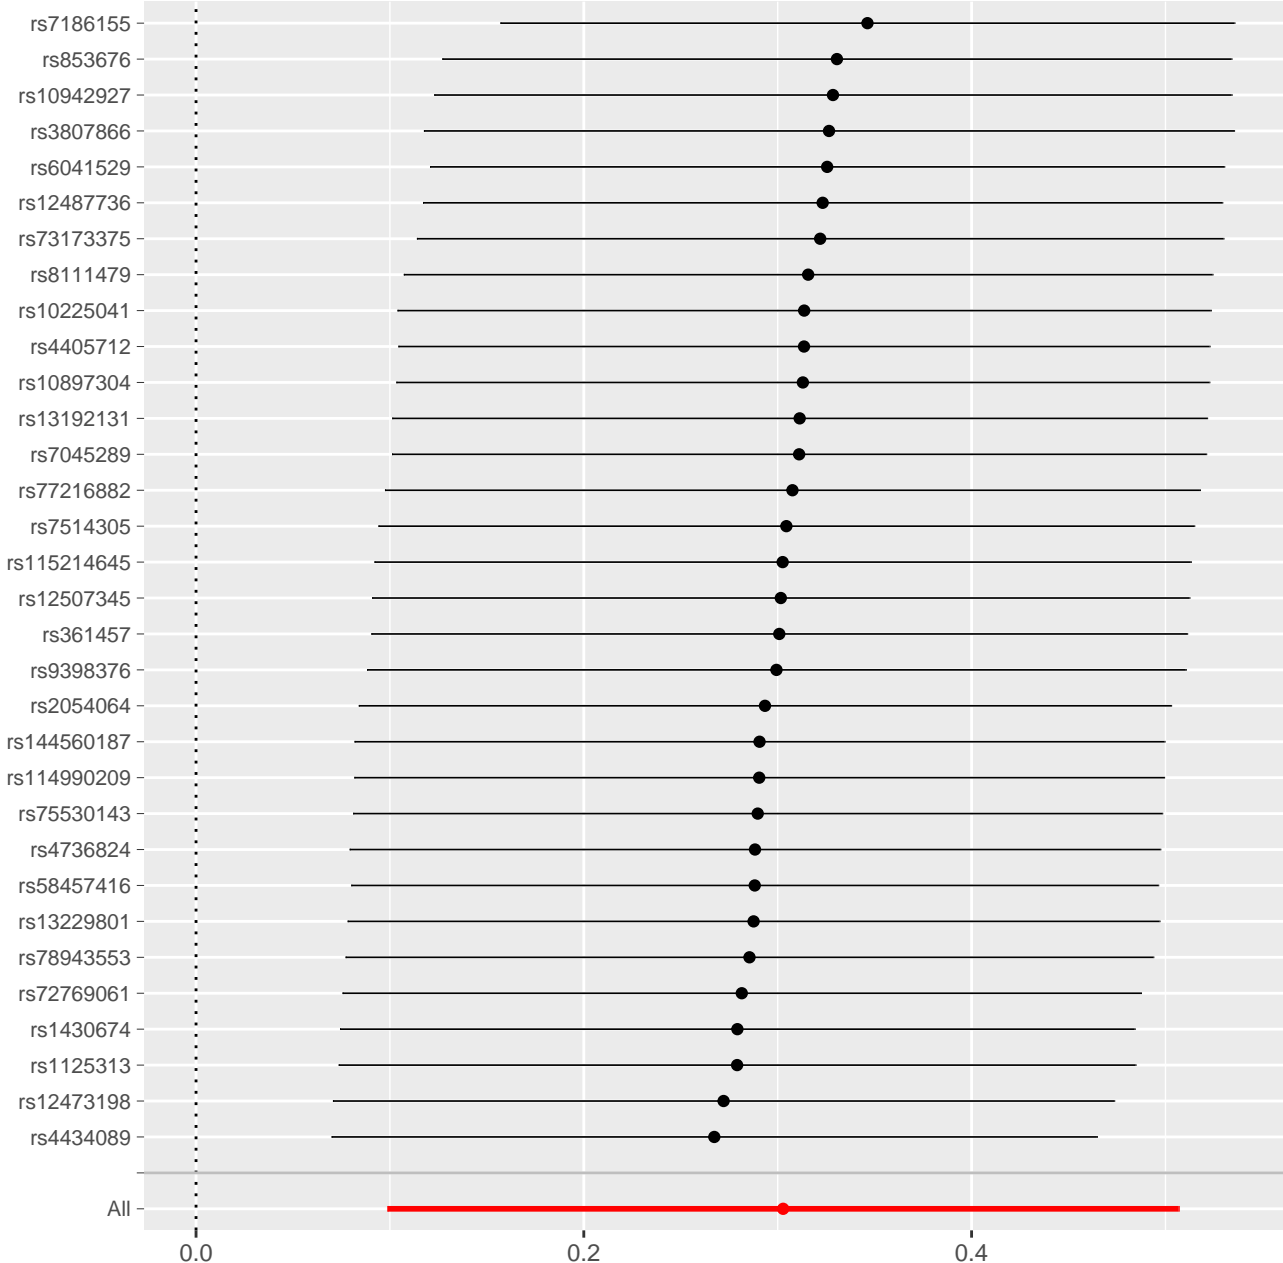

MR leave-one-out sensitivity analysis for ' || id:ukb-b-12064' on 'Pain type(s) experienced in last month: Back pain || id:ukb-b-9838'

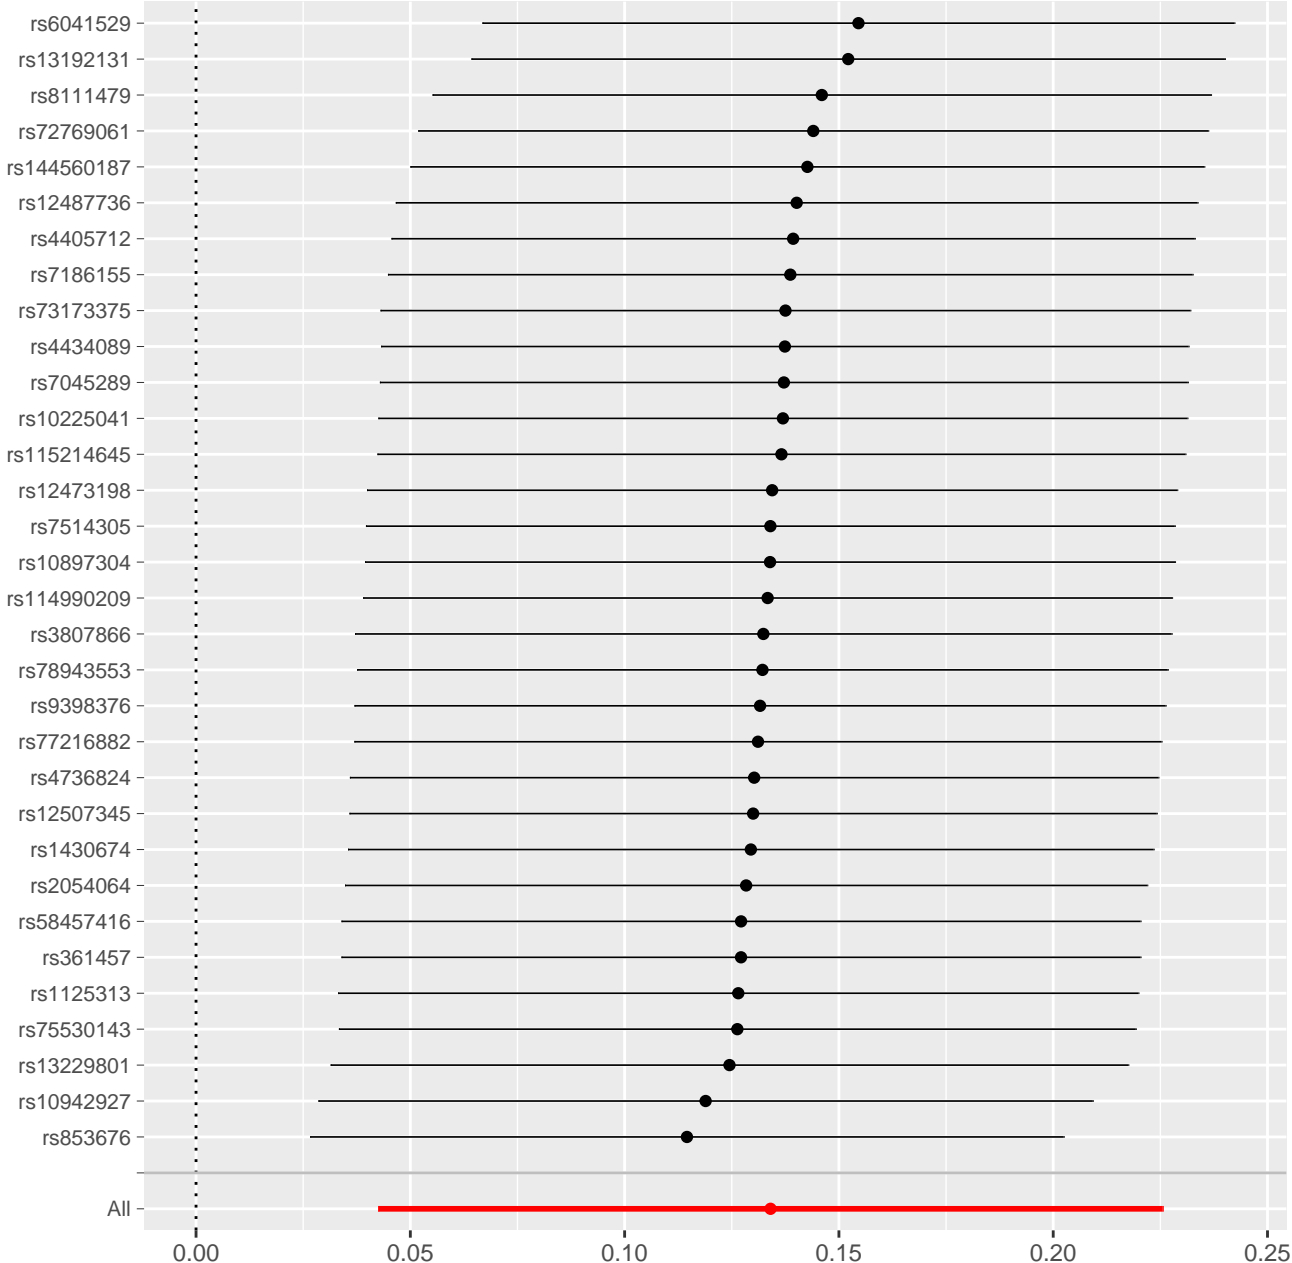



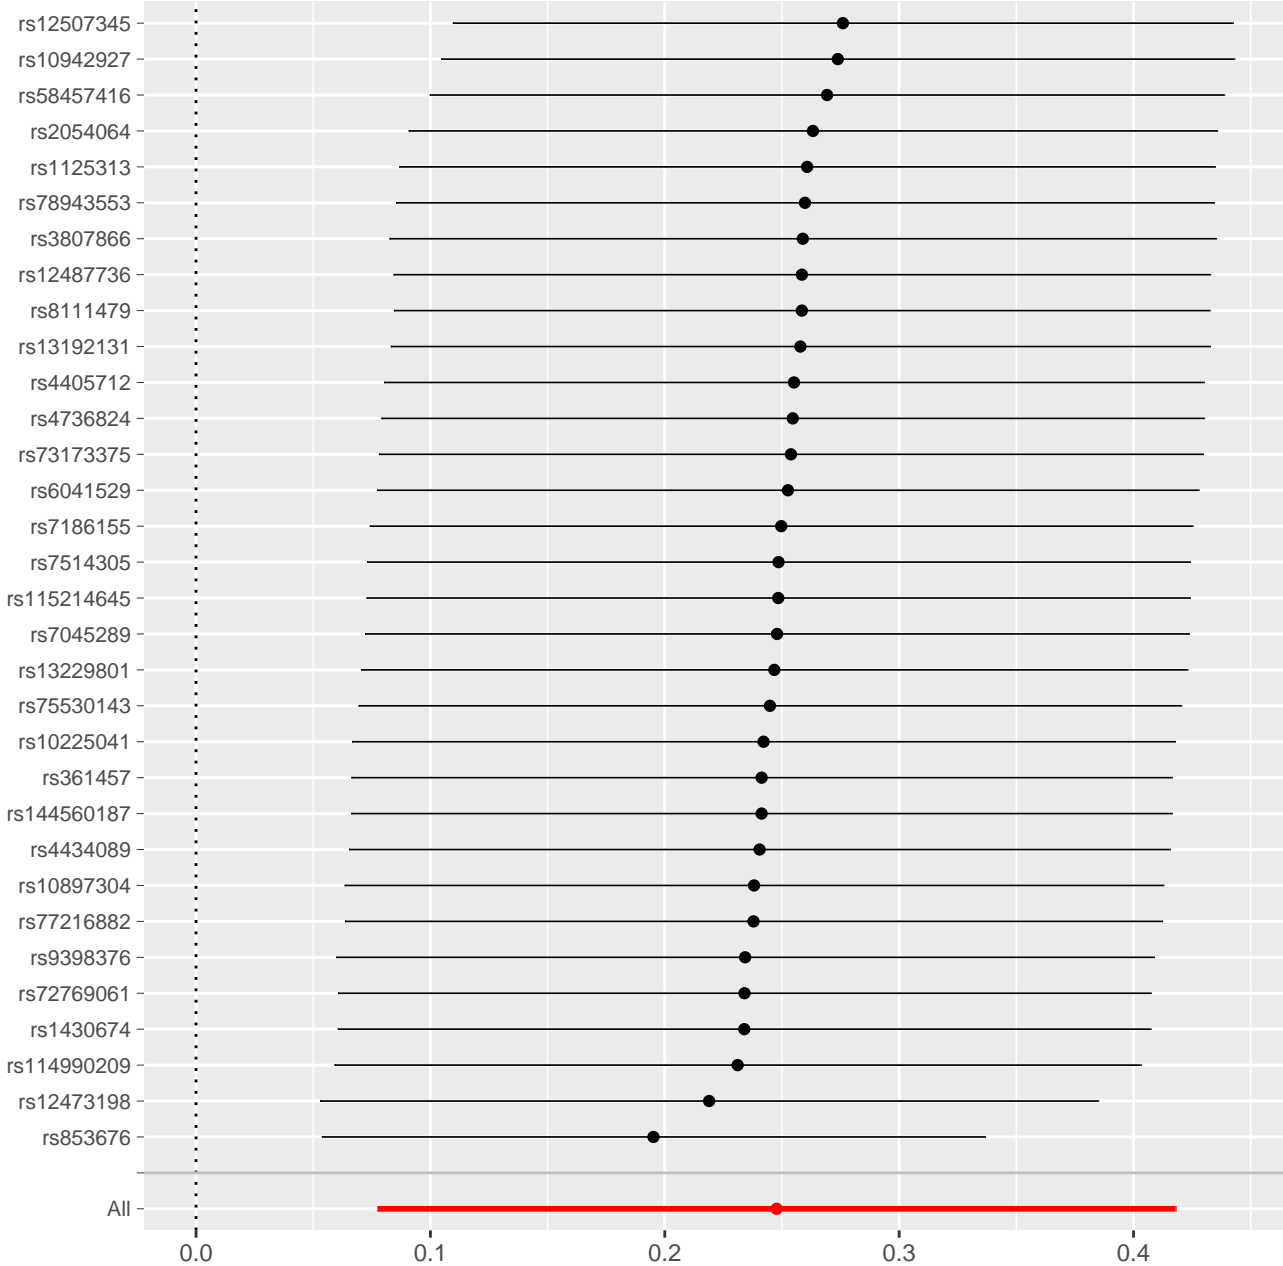

MR leave-one-out sensitivity analysis for ' || id:ukb-b-12064' on 'Pain type(s) experienced in last month: Headache || id:ukb-b-12181'

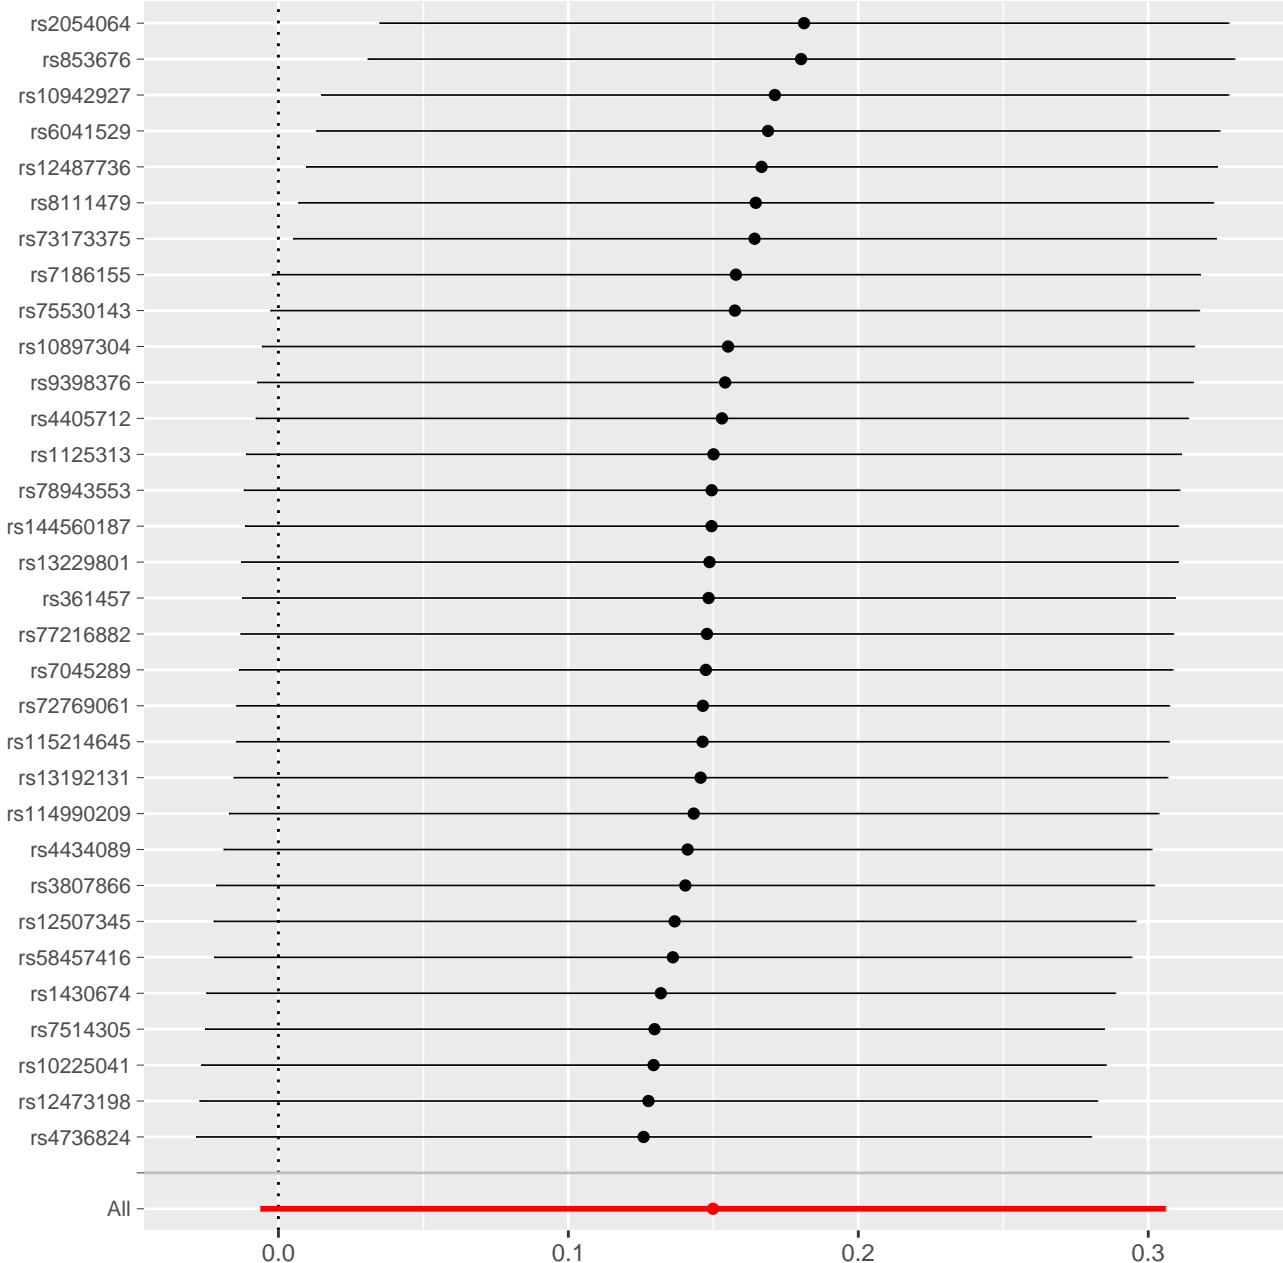

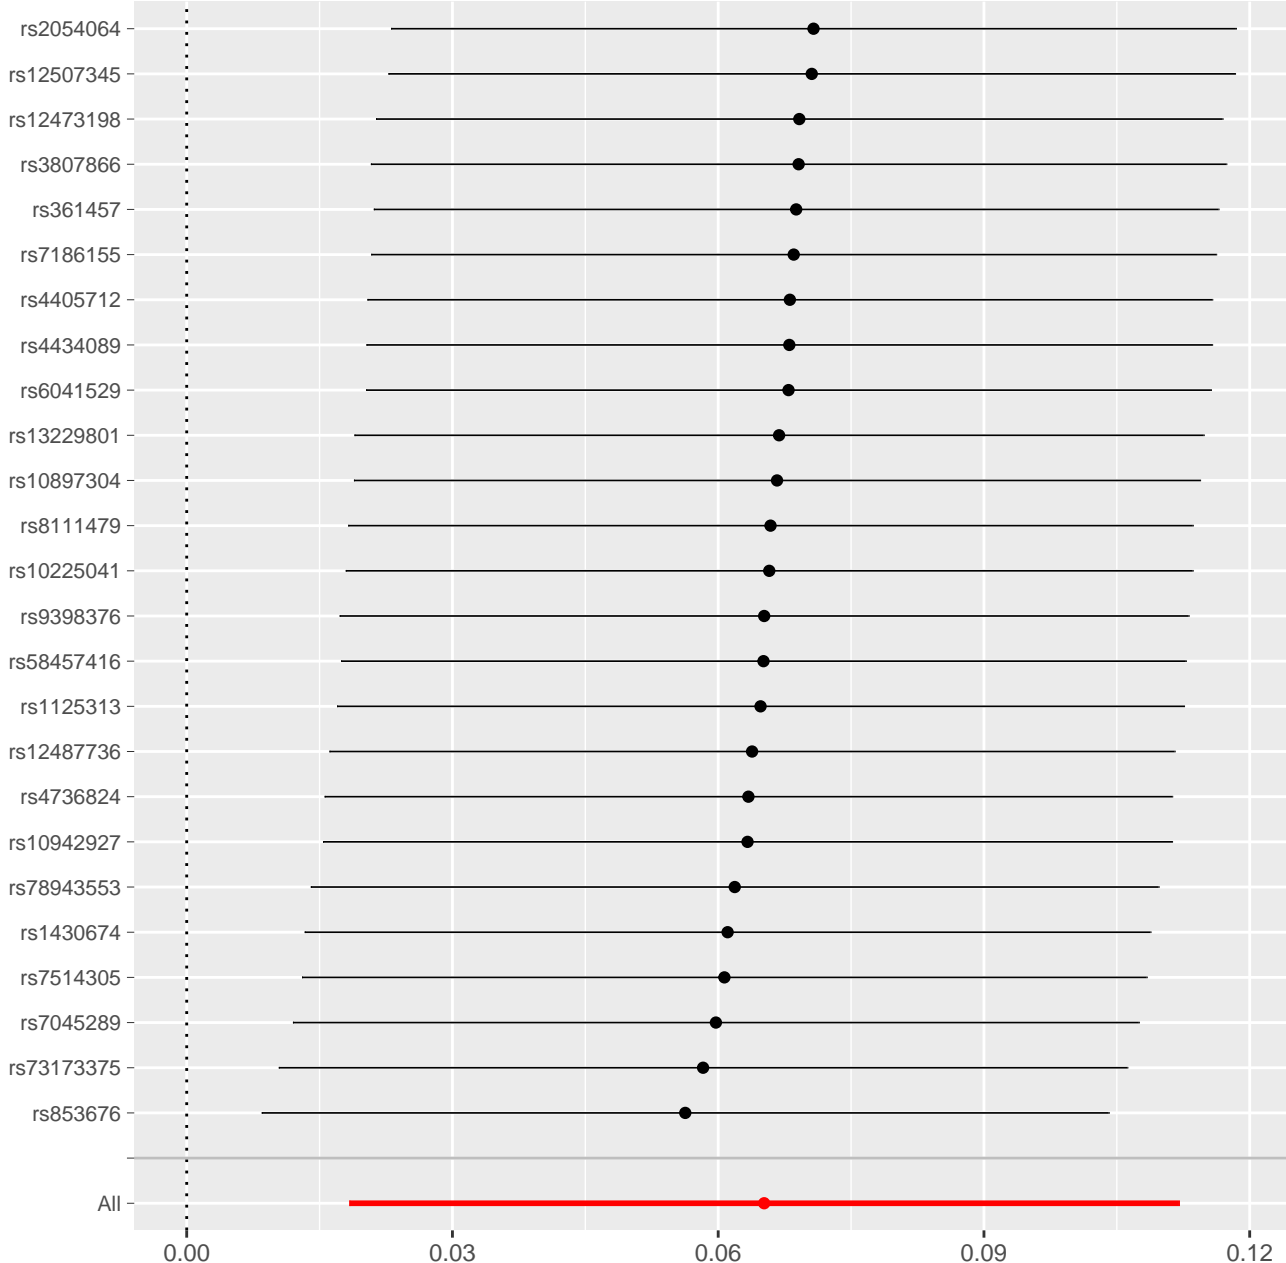

MR leave-one-out sensitivity analysis for ' || id:ukb-b-12064' on 'Pain type(s) experienced in last month: Facial pain || id:ukb-b-17107'

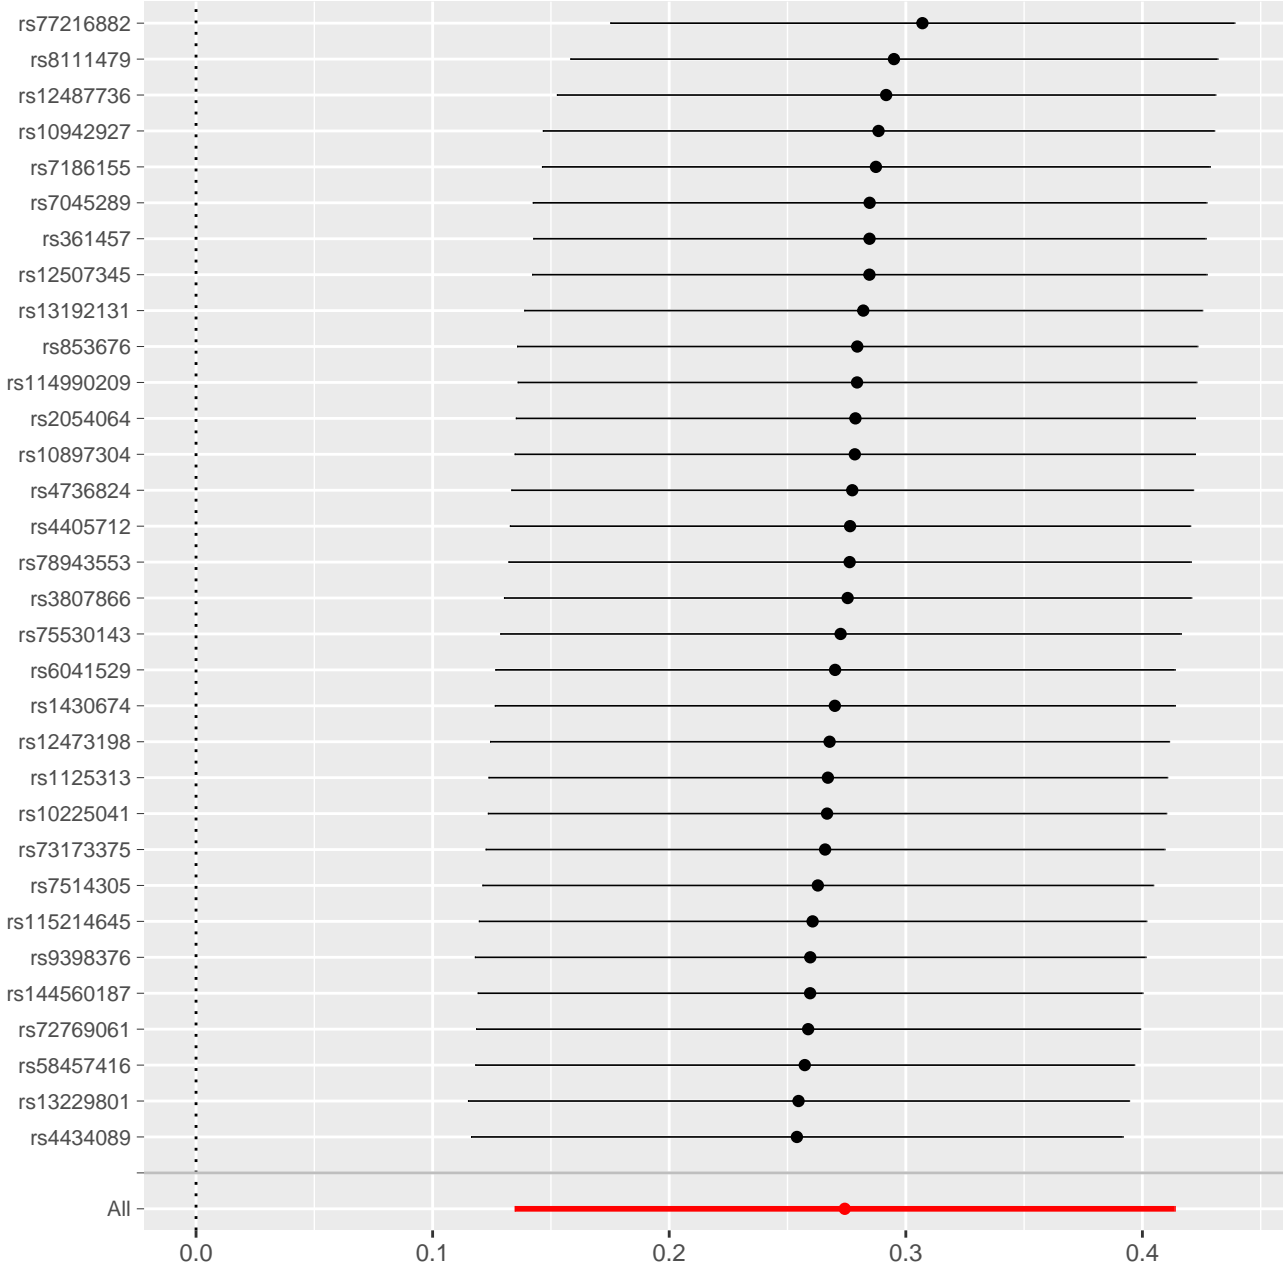

MR leave-one-out sensitivity analysis for ' || id:ukb-b-12064' on 'Pain type(s) experienced in last month: Neck or shoulder pain || id:ukb-b-18596'

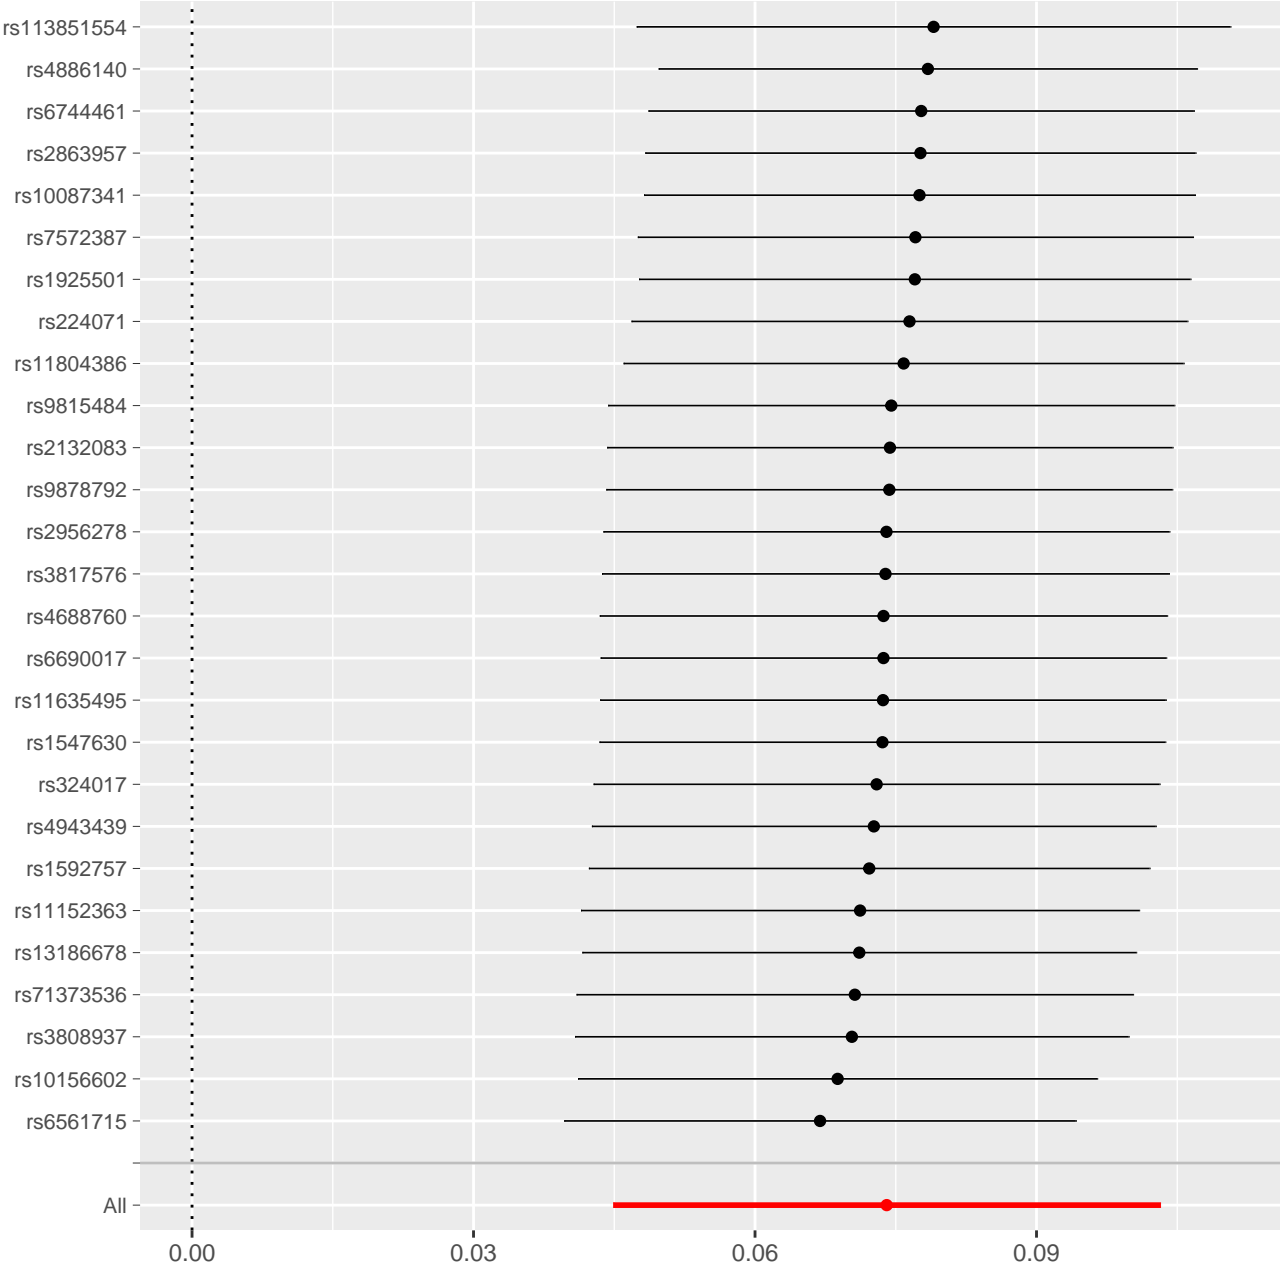

MR leave-one-out sensitivity analysis for 'Sleeplessness / insomnia || id:ukb-a-13' on 'Pain type(s) experienced in last month: Hip pain || id:ukb-b-7289'

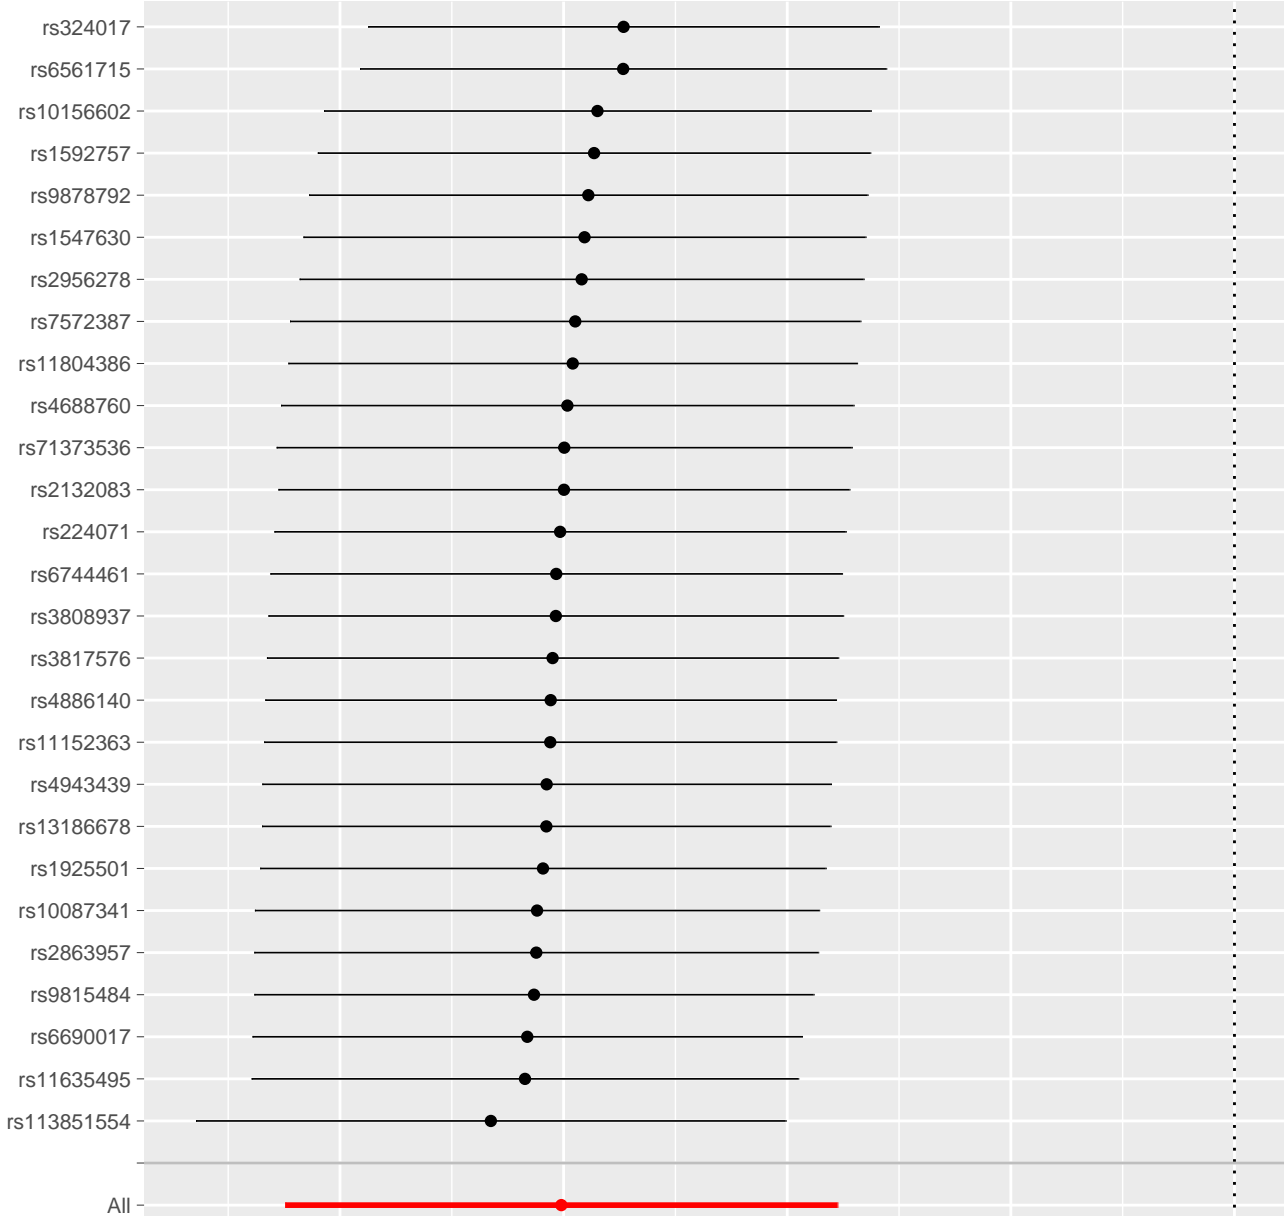

MR leave-one-out sensitivity analysis for 'Sleeplessness / insomnia || id:ukb-a-13' on 'Pain type(s) experienced in last month: None of the above || id:ukb-b-9130'

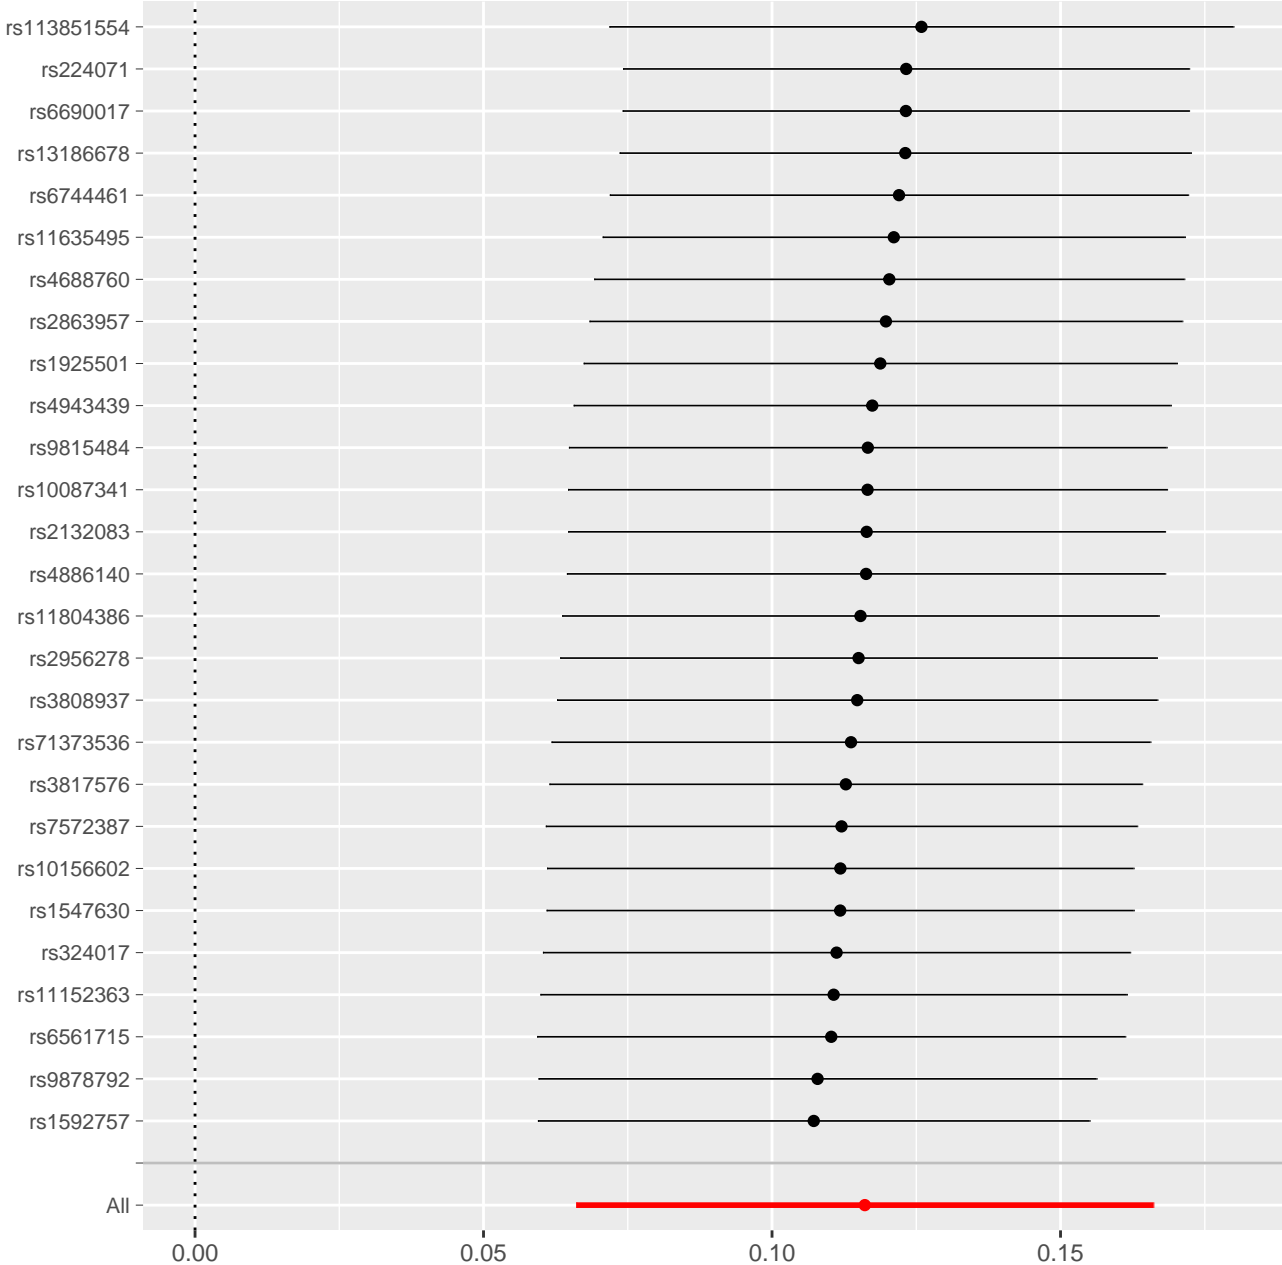

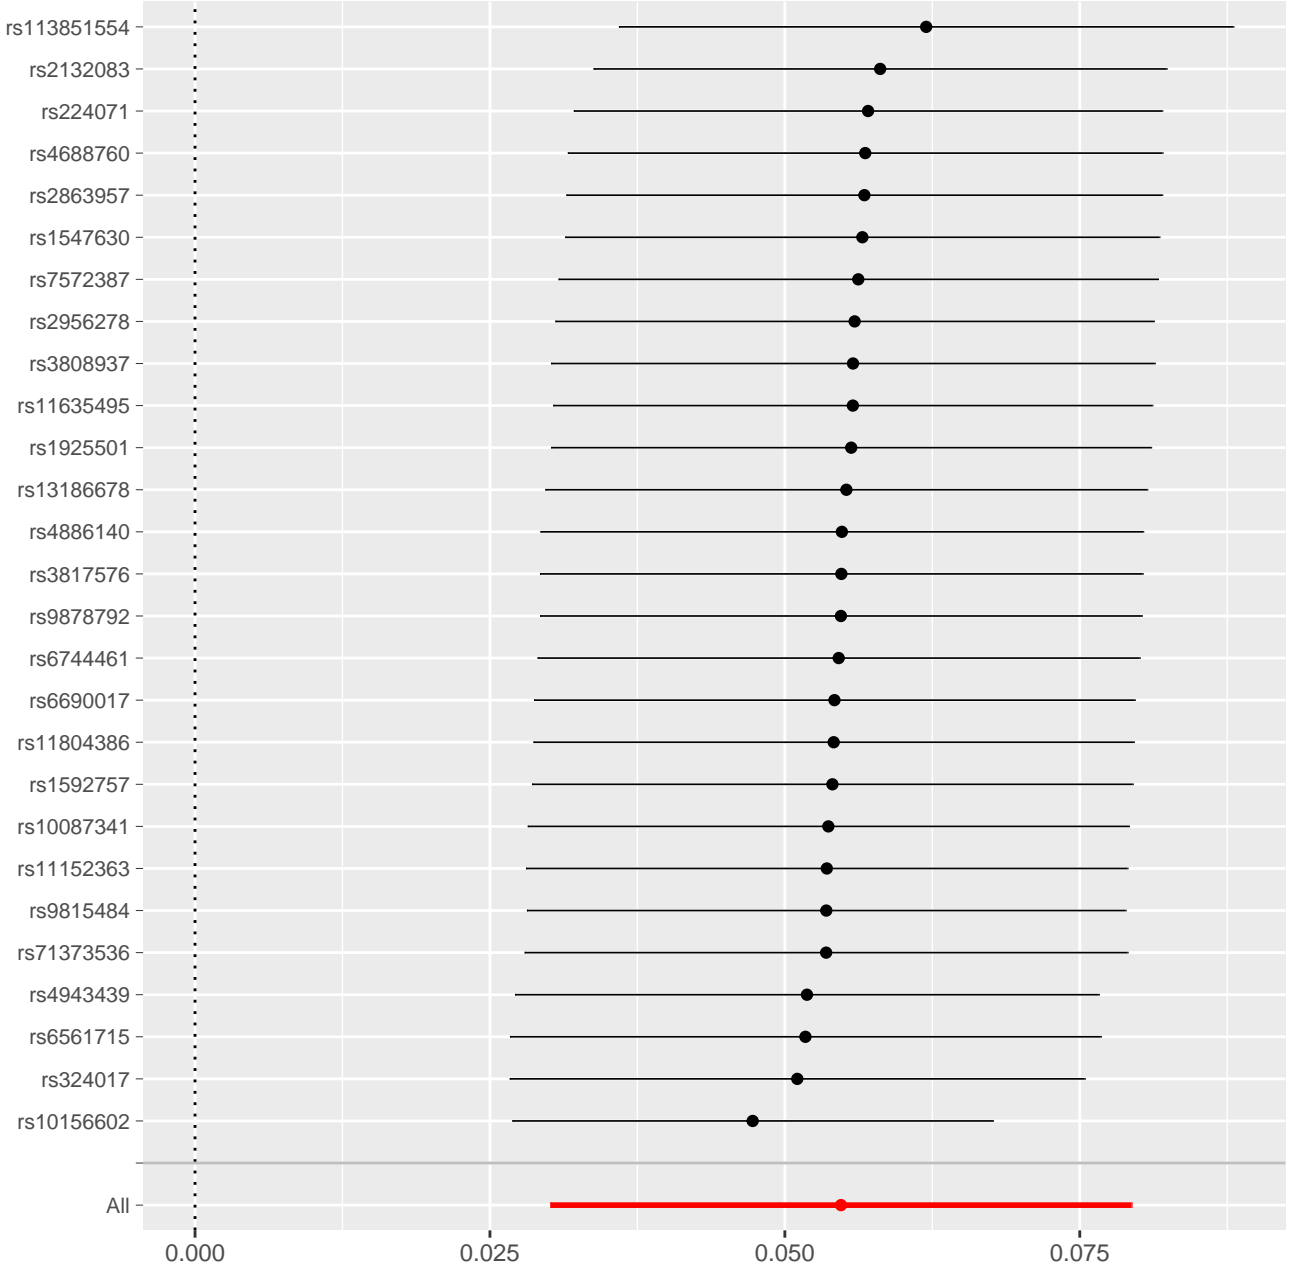

'Sleeplessness / insomnia || id:ukb-a-13' on 'Pain type(s) experienced in last month: Stomach or abdominal pain || id:ukb-b-114'



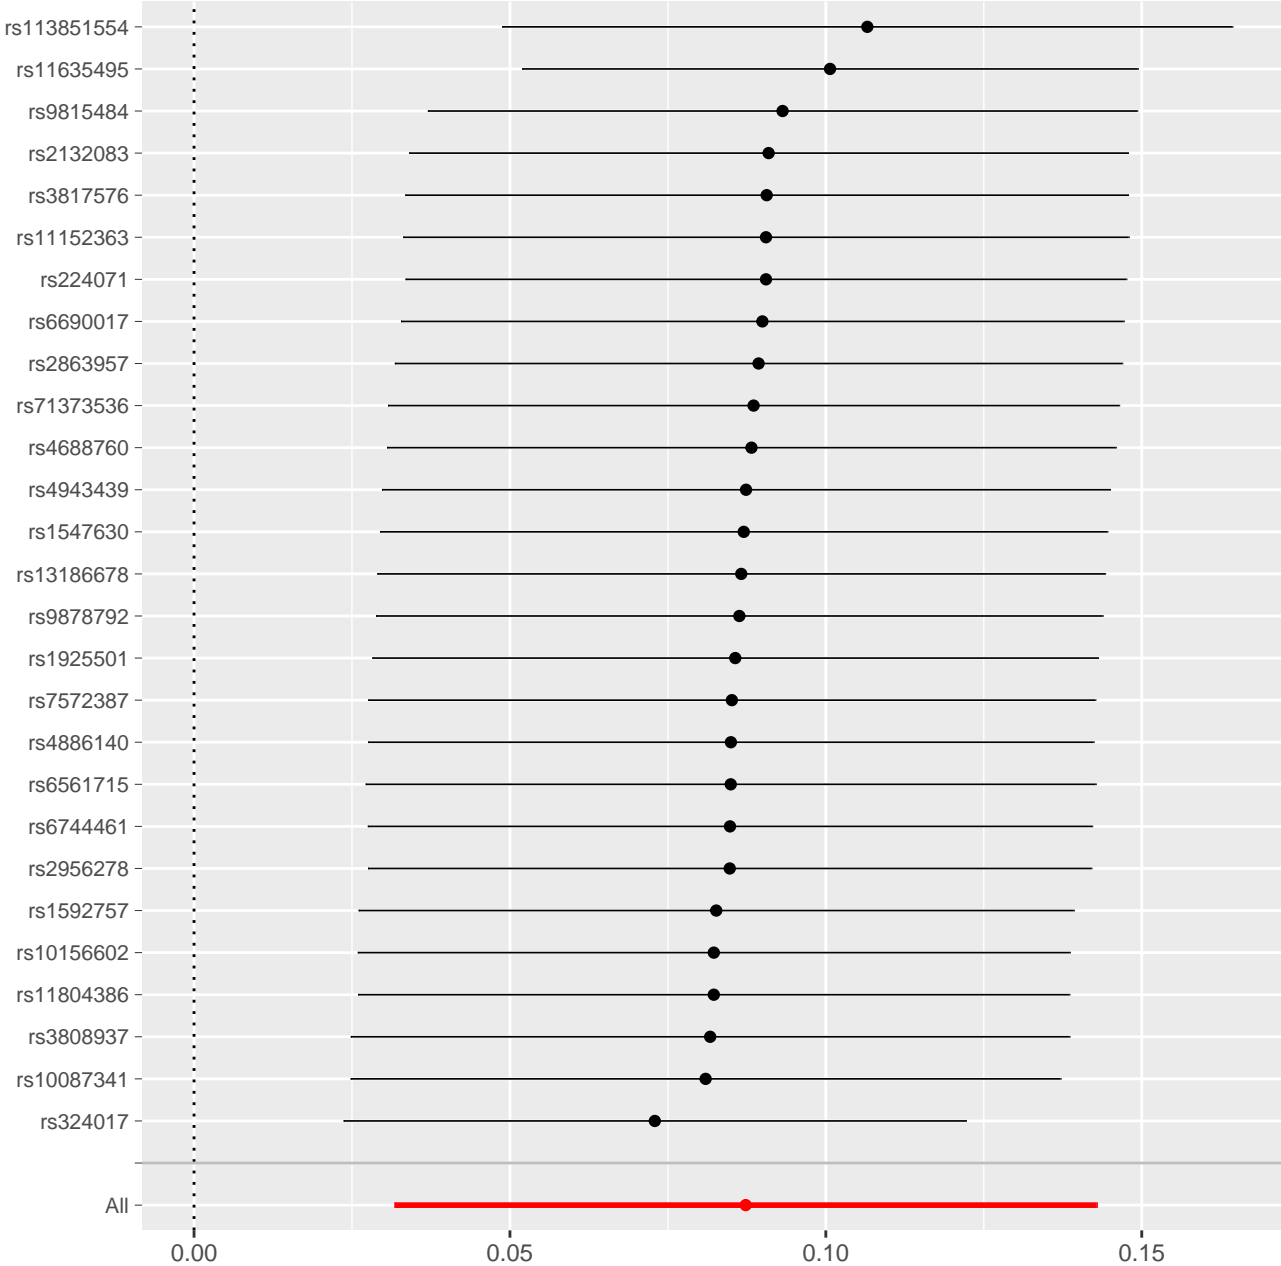

MR leave-one-out sensitivity analysis for 'Sleeplessness / insomnia || id:ukb-a-13' on 'Pain type(s) experienced in last month: Headache || id:ukb-b-12181'
