# Supplementary material for: Exploring the bidirectional relationship between pain and mental disorders: a comprehensive Mendelian randomization study
Source: PubMed Central journal article supplement (PMC10326936; doi:10.1186/s10194-023-01612-2), 2023-07-07
Supplement: 10194_2023_1612_MOESM7_ESM.pdf [file 10194_2023_1612_MOESM7_ESM.pdf]

## **Supplementary file 7**

Estimated biases due to sample overlap

### Bias and type 1 error rate for Mendelian randomization analysis of headache on sleeplessness/insomnia

| Using specified value of concentration parameter |       |                   | Using conservative value of concentration parameter |       |                   |
|--------------------------------------------------|-------|-------------------|-----------------------------------------------------|-------|-------------------|
| Overlap proportion                               | Bias  | Type 1 error rate | Overlap proportion                                  | Bias  | Type 1 error rate |
| 0.0                                              | 0.000 | 0.05              | 0.0                                                 | 0.000 | 0.05              |
| 0.1                                              | 0.000 | 0.05              | 0.1                                                 | 0.000 | 0.05              |
| 0.2                                              | 0.000 | 0.05              | 0.2                                                 | 0.000 | 0.05              |
| 0.3                                              | 0.001 | 0.05              | 0.3                                                 | 0.001 | 0.05              |
| 0.4                                              | 0.001 | 0.05              | 0.4                                                 | 0.001 | 0.05              |
| 0.5                                              | 0.001 | 0.05              | 0.5                                                 | 0.001 | 0.05              |
| 0.6                                              | 0.001 | 0.05              | 0.6                                                 | 0.001 | 0.05              |
| 0.7                                              | 0.001 | 0.05              | 0.7                                                 | 0.001 | 0.05              |
| 0.8                                              | 0.002 | 0.05              | 0.8                                                 | 0.002 | 0.05              |
| 0.9                                              | 0.002 | 0.05              | 0.9                                                 | 0.002 | 0.05              |
| 1.0                                              | 0.002 | 0.05              | 1.0                                                 | 0.002 | 0.05              |

Concentration parameter (expected value of F statistic) = 209.44  
 Conservative value of concentration parameter (lower limit of one-sided 95% confidence interval) = 209.43

### Bias and type 1 error rate for Mendelian randomization analysis of facial pain on sleeplessness/insomnia

| Using specified value of concentration parameter |       |                   | Using conservative value of concentration parameter |       |                   |
|--------------------------------------------------|-------|-------------------|-----------------------------------------------------|-------|-------------------|
| Overlap proportion                               | Bias  | Type 1 error rate | Overlap proportion                                  | Bias  | Type 1 error rate |
| 0.0                                              | 0.000 | 0.05              | 0.0                                                 | 0.000 | 0.05              |
| 0.1                                              | 0.000 | 0.05              | 0.1                                                 | 0.000 | 0.05              |
| 0.2                                              | 0.000 | 0.05              | 0.2                                                 | 0.000 | 0.05              |
| 0.3                                              | 0.000 | 0.05              | 0.3                                                 | 0.000 | 0.05              |
| 0.4                                              | 0.001 | 0.05              | 0.4                                                 | 0.001 | 0.05              |
| 0.5                                              | 0.001 | 0.05              | 0.5                                                 | 0.001 | 0.05              |
| 0.6                                              | 0.001 | 0.05              | 0.6                                                 | 0.001 | 0.05              |
| 0.7                                              | 0.001 | 0.05              | 0.7                                                 | 0.001 | 0.05              |
| 0.8                                              | 0.001 | 0.05              | 0.8                                                 | 0.001 | 0.05              |
| 0.9                                              | 0.001 | 0.05              | 0.9                                                 | 0.001 | 0.05              |
| 1.0                                              | 0.001 | 0.05              | 1.0                                                 | 0.001 | 0.05              |

Concentration parameter (expected value of F statistic) = 291.57  
 Conservative value of concentration parameter (lower limit of one-sided 95% confidence interval) = 291.56

### Bias and type 1 error rate for Mendelian randomization analysis of neck/shoulder pain on sleeplessness/insomnia

| Using specified value of concentration parameter |       |                   | Using conservative value of concentration parameter |       |                   |
|--------------------------------------------------|-------|-------------------|-----------------------------------------------------|-------|-------------------|
| Overlap proportion                               | Bias  | Type 1 error rate | Overlap proportion                                  | Bias  | Type 1 error rate |
| 0.0                                              | 0.000 | 0.05              | 0.0                                                 | 0.000 | 0.05              |
| 0.1                                              | 0.000 | 0.05              | 0.1                                                 | 0.000 | 0.05              |
| 0.2                                              | 0.000 | 0.05              | 0.2                                                 | 0.000 | 0.05              |
| 0.3                                              | 0.000 | 0.05              | 0.3                                                 | 0.000 | 0.05              |
| 0.4                                              | 0.000 | 0.05              | 0.4                                                 | 0.000 | 0.05              |
| 0.5                                              | 0.000 | 0.05              | 0.5                                                 | 0.000 | 0.05              |
| 0.6                                              | 0.000 | 0.05              | 0.6                                                 | 0.000 | 0.05              |
| 0.7                                              | 0.000 | 0.05              | 0.7                                                 | 0.000 | 0.05              |
| 0.8                                              | 0.000 | 0.05              | 0.8                                                 | 0.000 | 0.05              |
| 0.9                                              | 0.000 | 0.05              | 0.9                                                 | 0.000 | 0.05              |
| 1.0                                              | 0.001 | 0.05              | 1.0                                                 | 0.001 | 0.05              |

Concentration parameter (expected value of F statistic) = 777.53  
 Conservative value of concentration parameter (lower limit of one-sided 95% confidence interval) = 777.52

### Bias and type 1 error rate for Mendelian randomization analysis of back pain on sleeplessness/insomnia

| Using specified value of concentration parameter |       |                   | Using conservative value of concentration parameter |       |                   |
|--------------------------------------------------|-------|-------------------|-----------------------------------------------------|-------|-------------------|
| Overlap proportion                               | Bias  | Type 1 error rate | Overlap proportion                                  | Bias  | Type 1 error rate |
| 0.0                                              | 0.000 | 0.05              | 0.0                                                 | 0.000 | 0.05              |
| 0.1                                              | 0.000 | 0.05              | 0.1                                                 | 0.000 | 0.05              |
| 0.2                                              | 0.000 | 0.05              | 0.2                                                 | 0.000 | 0.05              |
| 0.3                                              | 0.001 | 0.05              | 0.3                                                 | 0.001 | 0.05              |
| 0.4                                              | 0.001 | 0.05              | 0.4                                                 | 0.001 | 0.05              |
| 0.5                                              | 0.001 | 0.05              | 0.5                                                 | 0.001 | 0.05              |
| 0.6                                              | 0.001 | 0.05              | 0.6                                                 | 0.001 | 0.05              |
| 0.7                                              | 0.001 | 0.05              | 0.7                                                 | 0.001 | 0.05              |
| 0.8                                              | 0.001 | 0.05              | 0.8                                                 | 0.001 | 0.05              |
| 0.9                                              | 0.002 | 0.05              | 0.9                                                 | 0.002 | 0.05              |
| 1.0                                              | 0.002 | 0.05              | 1.0                                                 | 0.002 | 0.05              |

Concentration parameter (expected value of F statistic) = 233.25  
 Conservative value of concentration parameter (lower limit of one-sided 95% confidence interval) = 233.25

### Bias and type 1 error rate for Mendelian randomization analysis of stomach/abdominal pain on sleeplessness/insomnia

| Using specified value of concentration parameter |       |                   | Using conservative value of concentration parameter |       |                   |
|--------------------------------------------------|-------|-------------------|-----------------------------------------------------|-------|-------------------|
| Overlap proportion                               | Bias  | Type 1 error rate | Overlap proportion                                  | Bias  | Type 1 error rate |
| 0.0                                              | 0.000 | 0.05              | 0.0                                                 | 0.000 | 0.05              |
| 0.1                                              | 0.000 | 0.05              | 0.1                                                 | 0.000 | 0.05              |
| 0.2                                              | 0.000 | 0.05              | 0.2                                                 | 0.000 | 0.05              |
| 0.3                                              | 0.000 | 0.05              | 0.3                                                 | 0.000 | 0.05              |
| 0.4                                              | 0.001 | 0.05              | 0.4                                                 | 0.001 | 0.05              |
| 0.5                                              | 0.001 | 0.05              | 0.5                                                 | 0.001 | 0.05              |
| 0.6                                              | 0.001 | 0.05              | 0.6                                                 | 0.001 | 0.05              |
| 0.7                                              | 0.001 | 0.05              | 0.7                                                 | 0.001 | 0.05              |
| 0.8                                              | 0.001 | 0.05              | 0.8                                                 | 0.001 | 0.05              |
| 0.9                                              | 0.001 | 0.05              | 0.9                                                 | 0.001 | 0.05              |
| 1.0                                              | 0.001 | 0.05              | 1.0                                                 | 0.001 | 0.05              |

Concentration parameter (expected value of F statistic) = 314.17  
 Conservative value of concentration parameter (lower limit of one-sided 95% confidence interval) = 314.16

### Bias and type 1 error rate for Mendelian randomization analysis of hip pain on sleeplessness/insomnia

| Using specified value of concentration parameter |       |                   | Using conservative value of concentration parameter |       |                   |
|--------------------------------------------------|-------|-------------------|-----------------------------------------------------|-------|-------------------|
| Overlap proportion                               | Bias  | Type 1 error rate | Overlap proportion                                  | Bias  | Type 1 error rate |
| 0.0                                              | 0.000 | 0.05              | 0.0                                                 | 0.000 | 0.05              |
| 0.1                                              | 0.000 | 0.05              | 0.1                                                 | 0.000 | 0.05              |
| 0.2                                              | 0.000 | 0.05              | 0.2                                                 | 0.000 | 0.05              |
| 0.3                                              | 0.000 | 0.05              | 0.3                                                 | 0.000 | 0.05              |
| 0.4                                              | 0.000 | 0.05              | 0.4                                                 | 0.000 | 0.05              |
| 0.5                                              | 0.000 | 0.05              | 0.5                                                 | 0.000 | 0.05              |
| 0.6                                              | 0.000 | 0.05              | 0.6                                                 | 0.000 | 0.05              |
| 0.7                                              | 0.000 | 0.05              | 0.7                                                 | 0.000 | 0.05              |
| 0.8                                              | 0.000 | 0.05              | 0.8                                                 | 0.000 | 0.05              |
| 0.9                                              | 0.000 | 0.05              | 0.9                                                 | 0.000 | 0.05              |
| 1.0                                              | 0.000 | 0.05              | 1.0                                                 | 0.000 | 0.05              |

Concentration parameter (expected value of F statistic) = 2356.39  
 Conservative value of concentration parameter (lower limit of one-sided 95% confidence interval) = 2356.38

### Bias and type 1 error rate for Mendelian randomization analysis of knee pain on sleeplessness/insomnia

| Using specified value of concentration parameter |       |                   | Using conservative value of concentration parameter |       |                   |
|--------------------------------------------------|-------|-------------------|-----------------------------------------------------|-------|-------------------|
| Overlap proportion                               | Bias  | Type 1 error rate | Overlap proportion                                  | Bias  | Type 1 error rate |
| 0.0                                              | 0.000 | 0.05              | 0.0                                                 | 0.000 | 0.05              |
| 0.1                                              | 0.000 | 0.05              | 0.1                                                 | 0.000 | 0.05              |
| 0.2                                              | 0.000 | 0.05              | 0.2                                                 | 0.000 | 0.05              |
| 0.3                                              | 0.000 | 0.05              | 0.3                                                 | 0.000 | 0.05              |
| 0.4                                              | 0.000 | 0.05              | 0.4                                                 | 0.000 | 0.05              |
| 0.5                                              | 0.000 | 0.05              | 0.5                                                 | 0.000 | 0.05              |
| 0.6                                              | 0.000 | 0.05              | 0.6                                                 | 0.000 | 0.05              |
| 0.7                                              | 0.000 | 0.05              | 0.7                                                 | 0.000 | 0.05              |
| 0.8                                              | 0.000 | 0.05              | 0.8                                                 | 0.000 | 0.05              |
| 0.9                                              | 0.000 | 0.05              | 0.9                                                 | 0.000 | 0.05              |
| 1.0                                              | 0.000 | 0.05              | 1.0                                                 | 0.000 | 0.05              |

Concentration parameter (expected value of F statistic) = 856.86  
 Conservative value of concentration parameter (lower limit of one-sided 95% confidence interval) = 856.85

### Bias and type 1 error rate for Mendelian randomization analysis of no pain on sleeplessness/insomnia

| Using specified value of concentration parameter |       |                   | Using conservative value of concentration parameter |       |                   |
|--------------------------------------------------|-------|-------------------|-----------------------------------------------------|-------|-------------------|
| Overlap proportion                               | Bias  | Type 1 error rate | Overlap proportion                                  | Bias  | Type 1 error rate |
| 0.0                                              | 0.000 | 0.05              | 0.0                                                 | 0.000 | 0.05              |
| 0.1                                              | 0.000 | 0.05              | 0.1                                                 | 0.000 | 0.05              |
| 0.2                                              | 0.000 | 0.05              | 0.2                                                 | 0.000 | 0.05              |
| 0.3                                              | 0.000 | 0.05              | 0.3                                                 | 0.000 | 0.05              |
| 0.4                                              | 0.001 | 0.05              | 0.4                                                 | 0.001 | 0.05              |
| 0.5                                              | 0.001 | 0.05              | 0.5                                                 | 0.001 | 0.05              |
| 0.6                                              | 0.001 | 0.05              | 0.6                                                 | 0.001 | 0.05              |
| 0.7                                              | 0.001 | 0.05              | 0.7                                                 | 0.001 | 0.05              |
| 0.8                                              | 0.001 | 0.05              | 0.8                                                 | 0.001 | 0.05              |
| 0.9                                              | 0.001 | 0.05              | 0.9                                                 | 0.001 | 0.05              |
| 1.0                                              | 0.002 | 0.05              | 1.0                                                 | 0.002 | 0.05              |

Concentration parameter (expected value of F statistic) = 254.73  
 Conservative value of concentration parameter (lower limit of one-sided 95% confidence interval) = 254.72

### Bias and type 1 error rate for Mendelian randomization analysis of headache on anxiety/panic attacks

| Using specified value of concentration parameter |       |                   | Using conservative value of concentration parameter |       |                   |
|--------------------------------------------------|-------|-------------------|-----------------------------------------------------|-------|-------------------|
| Overlap proportion                               | Bias  | Type 1 error rate | Overlap proportion                                  | Bias  | Type 1 error rate |
| 0.0                                              | 0.000 | 0.05              | 0.0                                                 | 0.000 | 0.05              |
| 0.1                                              | 0.000 | 0.05              | 0.1                                                 | 0.000 | 0.05              |
| 0.2                                              | 0.000 | 0.05              | 0.2                                                 | 0.000 | 0.05              |
| 0.3                                              | 0.001 | 0.05              | 0.3                                                 | 0.001 | 0.05              |
| 0.4                                              | 0.001 | 0.05              | 0.4                                                 | 0.001 | 0.05              |
| 0.5                                              | 0.001 | 0.05              | 0.5                                                 | 0.001 | 0.05              |
| 0.6                                              | 0.001 | 0.05              | 0.6                                                 | 0.001 | 0.05              |
| 0.7                                              | 0.001 | 0.05              | 0.7                                                 | 0.001 | 0.05              |
| 0.8                                              | 0.002 | 0.05              | 0.8                                                 | 0.002 | 0.05              |
| 0.9                                              | 0.002 | 0.05              | 0.9                                                 | 0.002 | 0.05              |
| 1.0                                              | 0.002 | 0.05              | 1.0                                                 | 0.002 | 0.05              |

Concentration parameter (expected value of F statistic) = 209.44  
 Conservative value of concentration parameter (lower limit of one-sided 95% confidence interval) = 209.43

### Bias and type 1 error rate for Mendelian randomization analysis of facial pain on anxiety/panic attacks

| Using specified value of concentration parameter |       |                   | Using conservative value of concentration parameter |       |                   |
|--------------------------------------------------|-------|-------------------|-----------------------------------------------------|-------|-------------------|
| Overlap proportion                               | Bias  | Type 1 error rate | Overlap proportion                                  | Bias  | Type 1 error rate |
| 0.0                                              | 0.000 | 0.05              | 0.0                                                 | 0.000 | 0.05              |
| 0.1                                              | 0.000 | 0.05              | 0.1                                                 | 0.000 | 0.05              |
| 0.2                                              | 0.000 | 0.05              | 0.2                                                 | 0.000 | 0.05              |
| 0.3                                              | 0.000 | 0.05              | 0.3                                                 | 0.000 | 0.05              |
| 0.4                                              | 0.000 | 0.05              | 0.4                                                 | 0.000 | 0.05              |
| 0.5                                              | 0.000 | 0.05              | 0.5                                                 | 0.000 | 0.05              |
| 0.6                                              | 0.000 | 0.05              | 0.6                                                 | 0.000 | 0.05              |
| 0.7                                              | 0.000 | 0.05              | 0.7                                                 | 0.000 | 0.05              |
| 0.8                                              | 0.001 | 0.05              | 0.8                                                 | 0.001 | 0.05              |
| 0.9                                              | 0.001 | 0.05              | 0.9                                                 | 0.001 | 0.05              |
| 1.0                                              | 0.001 | 0.05              | 1.0                                                 | 0.001 | 0.05              |

Concentration parameter (expected value of F statistic) = 589.08  
 Conservative value of concentration parameter (lower limit of one-sided 95% confidence interval) = 589.08

### Bias and type 1 error rate for Mendelian randomization analysis of neck/shoulder pain on anxiety/panic attacks

| Using specified value of concentration parameter |       |                   | Using conservative value of concentration parameter |       |                   |
|--------------------------------------------------|-------|-------------------|-----------------------------------------------------|-------|-------------------|
| Overlap proportion                               | Bias  | Type 1 error rate | Overlap proportion                                  | Bias  | Type 1 error rate |
| 0.0                                              | 0.000 | 0.05              | 0.0                                                 | 0.000 | 0.05              |
| 0.1                                              | 0.000 | 0.05              | 0.1                                                 | 0.000 | 0.05              |
| 0.2                                              | 0.000 | 0.05              | 0.2                                                 | 0.000 | 0.05              |
| 0.3                                              | 0.000 | 0.05              | 0.3                                                 | 0.000 | 0.05              |
| 0.4                                              | 0.000 | 0.05              | 0.4                                                 | 0.000 | 0.05              |
| 0.5                                              | 0.000 | 0.05              | 0.5                                                 | 0.000 | 0.05              |
| 0.6                                              | 0.000 | 0.05              | 0.6                                                 | 0.000 | 0.05              |
| 0.7                                              | 0.000 | 0.05              | 0.7                                                 | 0.000 | 0.05              |
| 0.8                                              | 0.000 | 0.05              | 0.8                                                 | 0.000 | 0.05              |
| 0.9                                              | 0.000 | 0.05              | 0.9                                                 | 0.000 | 0.05              |
| 1.0                                              | 0.000 | 0.05              | 1.0                                                 | 0.000 | 0.05              |

Concentration parameter (expected value of F statistic) = 1570.92  
 Conservative value of concentration parameter (lower limit of one-sided 95% confidence interval) = 1570.91

### Bias and type 1 error rate for Mendelian randomization analysis of back pain on anxiety/panic attacks

| Using specified value of concentration parameter |       |                   | Using conservative value of concentration parameter |       |                   |
|--------------------------------------------------|-------|-------------------|-----------------------------------------------------|-------|-------------------|
| Overlap proportion                               | Bias  | Type 1 error rate | Overlap proportion                                  | Bias  | Type 1 error rate |
| 0.0                                              | 0.000 | 0.05              | 0.0                                                 | 0.000 | 0.05              |
| 0.1                                              | 0.000 | 0.05              | 0.1                                                 | 0.000 | 0.05              |
| 0.2                                              | 0.000 | 0.05              | 0.2                                                 | 0.000 | 0.05              |
| 0.3                                              | 0.000 | 0.05              | 0.3                                                 | 0.000 | 0.05              |
| 0.4                                              | 0.000 | 0.05              | 0.4                                                 | 0.000 | 0.05              |
| 0.5                                              | 0.000 | 0.05              | 0.5                                                 | 0.000 | 0.05              |
| 0.6                                              | 0.001 | 0.05              | 0.6                                                 | 0.001 | 0.05              |
| 0.7                                              | 0.001 | 0.05              | 0.7                                                 | 0.001 | 0.05              |
| 0.8                                              | 0.001 | 0.05              | 0.8                                                 | 0.001 | 0.05              |
| 0.9                                              | 0.001 | 0.05              | 0.9                                                 | 0.001 | 0.05              |
| 1.0                                              | 0.001 | 0.05              | 1.0                                                 | 0.001 | 0.05              |

Concentration parameter (expected value of F statistic) = 471.26  
 Conservative value of concentration parameter (lower limit of one-sided 95% confidence interval) = 471.26

### Bias and type 1 error rate for Mendelian randomization analysis of stomach/abdominal pain on anxiety/panic attacks

| Using specified value of concentration parameter |       |                   | Using conservative value of concentration parameter |       |                   |
|--------------------------------------------------|-------|-------------------|-----------------------------------------------------|-------|-------------------|
| Overlap proportion                               | Bias  | Type 1 error rate | Overlap proportion                                  | Bias  | Type 1 error rate |
| 0.0                                              | 0.000 | 0.05              | 0.0                                                 | 0.000 | 0.05              |
| 0.1                                              | 0.000 | 0.05              | 0.1                                                 | 0.000 | 0.05              |
| 0.2                                              | 0.000 | 0.05              | 0.2                                                 | 0.000 | 0.05              |
| 0.3                                              | 0.000 | 0.05              | 0.3                                                 | 0.000 | 0.05              |
| 0.4                                              | 0.001 | 0.05              | 0.4                                                 | 0.001 | 0.05              |
| 0.5                                              | 0.001 | 0.05              | 0.5                                                 | 0.001 | 0.05              |
| 0.6                                              | 0.001 | 0.05              | 0.6                                                 | 0.001 | 0.05              |
| 0.7                                              | 0.001 | 0.05              | 0.7                                                 | 0.001 | 0.05              |
| 0.8                                              | 0.001 | 0.05              | 0.8                                                 | 0.001 | 0.05              |
| 0.9                                              | 0.001 | 0.05              | 0.9                                                 | 0.001 | 0.05              |
| 1.0                                              | 0.001 | 0.05              | 1.0                                                 | 0.001 | 0.05              |

Concentration parameter (expected value of F statistic) = 314.17  
 Conservative value of concentration parameter (lower limit of one-sided 95% confidence interval) = 314.16

### Bias and type 1 error rate for Mendelian randomization analysis of hip pain on anxiety/panic attacks

| Using specified value of concentration parameter |       |                   | Using conservative value of concentration parameter |       |                   |
|--------------------------------------------------|-------|-------------------|-----------------------------------------------------|-------|-------------------|
| Overlap proportion                               | Bias  | Type 1 error rate | Overlap proportion                                  | Bias  | Type 1 error rate |
| 0.0                                              | 0.000 | 0.05              | 0.0                                                 | 0.000 | 0.05              |
| 0.1                                              | 0.000 | 0.05              | 0.1                                                 | 0.000 | 0.05              |
| 0.2                                              | 0.000 | 0.05              | 0.2                                                 | 0.000 | 0.05              |
| 0.3                                              | 0.000 | 0.05              | 0.3                                                 | 0.000 | 0.05              |
| 0.4                                              | 0.000 | 0.05              | 0.4                                                 | 0.000 | 0.05              |
| 0.5                                              | 0.000 | 0.05              | 0.5                                                 | 0.000 | 0.05              |
| 0.6                                              | 0.000 | 0.05              | 0.6                                                 | 0.000 | 0.05              |
| 0.7                                              | 0.000 | 0.05              | 0.7                                                 | 0.000 | 0.05              |
| 0.8                                              | 0.000 | 0.05              | 0.8                                                 | 0.000 | 0.05              |
| 0.9                                              | 0.000 | 0.05              | 0.9                                                 | 0.000 | 0.05              |
| 1.0                                              | 0.000 | 0.05              | 1.0                                                 | 0.000 | 0.05              |

Concentration parameter (expected value of F statistic) = 2356.39  
 Conservative value of concentration parameter (lower limit of one-sided 95% confidence interval) = 2356.38

### Bias and type 1 error rate for Mendelian randomization analysis of knee pain on anxiety/panic attacks

| Using specified value of concentration parameter |       |                   | Using conservative value of concentration parameter |       |                   |
|--------------------------------------------------|-------|-------------------|-----------------------------------------------------|-------|-------------------|
| Overlap proportion                               | Bias  | Type 1 error rate | Overlap proportion                                  | Bias  | Type 1 error rate |
| 0.0                                              | 0.000 | 0.05              | 0.0                                                 | 0.000 | 0.05              |
| 0.1                                              | 0.000 | 0.05              | 0.1                                                 | 0.000 | 0.05              |
| 0.2                                              | 0.000 | 0.05              | 0.2                                                 | 0.000 | 0.05              |
| 0.3                                              | 0.000 | 0.05              | 0.3                                                 | 0.000 | 0.05              |
| 0.4                                              | 0.000 | 0.05              | 0.4                                                 | 0.000 | 0.05              |
| 0.5                                              | 0.000 | 0.05              | 0.5                                                 | 0.000 | 0.05              |
| 0.6                                              | 0.000 | 0.05              | 0.6                                                 | 0.000 | 0.05              |
| 0.7                                              | 0.000 | 0.05              | 0.7                                                 | 0.000 | 0.05              |
| 0.8                                              | 0.000 | 0.05              | 0.8                                                 | 0.000 | 0.05              |
| 0.9                                              | 0.000 | 0.05              | 0.9                                                 | 0.000 | 0.05              |
| 1.0                                              | 0.000 | 0.05              | 1.0                                                 | 0.000 | 0.05              |

Concentration parameter (expected value of F statistic) = 856.86  
 Conservative value of concentration parameter (lower limit of one-sided 95% confidence interval) = 856.85

### Bias and type 1 error rate for Mendelian randomization analysis of no pain on anxiety/panic attacks

| Using specified value of concentration parameter |       |                   | Using conservative value of concentration parameter |       |                   |
|--------------------------------------------------|-------|-------------------|-----------------------------------------------------|-------|-------------------|
| Overlap proportion                               | Bias  | Type 1 error rate | Overlap proportion                                  | Bias  | Type 1 error rate |
| 0.0                                              | 0.000 | 0.05              | 0.0                                                 | 0.000 | 0.05              |
| 0.1                                              | 0.000 | 0.05              | 0.1                                                 | 0.000 | 0.05              |
| 0.2                                              | 0.000 | 0.05              | 0.2                                                 | 0.000 | 0.05              |
| 0.3                                              | 0.000 | 0.05              | 0.3                                                 | 0.000 | 0.05              |
| 0.4                                              | 0.001 | 0.05              | 0.4                                                 | 0.001 | 0.05              |
| 0.5                                              | 0.001 | 0.05              | 0.5                                                 | 0.001 | 0.05              |
| 0.6                                              | 0.001 | 0.05              | 0.6                                                 | 0.001 | 0.05              |
| 0.7                                              | 0.001 | 0.05              | 0.7                                                 | 0.001 | 0.05              |
| 0.8                                              | 0.001 | 0.05              | 0.8                                                 | 0.001 | 0.05              |
| 0.9                                              | 0.001 | 0.05              | 0.9                                                 | 0.001 | 0.05              |
| 1.0                                              | 0.002 | 0.05              | 1.0                                                 | 0.002 | 0.05              |

Concentration parameter (expected value of F statistic) = 254.73  
 Conservative value of concentration parameter (lower limit of one-sided 95% confidence interval) = 254.72

### Bias and type 1 error rate for Mendelian randomization analysis of headache on depression

| Using specified value of concentration parameter |       |                   | Using conservative value of concentration parameter |       |                   |
|--------------------------------------------------|-------|-------------------|-----------------------------------------------------|-------|-------------------|
| Overlap proportion                               | Bias  | Type 1 error rate | Overlap proportion                                  | Bias  | Type 1 error rate |
| 0.0                                              | 0.000 | 0.05              | 0.0                                                 | 0.000 | 0.05              |
| 0.1                                              | 0.000 | 0.05              | 0.1                                                 | 0.000 | 0.05              |
| 0.2                                              | 0.000 | 0.05              | 0.2                                                 | 0.000 | 0.05              |
| 0.3                                              | 0.001 | 0.05              | 0.3                                                 | 0.001 | 0.05              |
| 0.4                                              | 0.001 | 0.05              | 0.4                                                 | 0.001 | 0.05              |
| 0.5                                              | 0.001 | 0.05              | 0.5                                                 | 0.001 | 0.05              |
| 0.6                                              | 0.001 | 0.05              | 0.6                                                 | 0.001 | 0.05              |
| 0.7                                              | 0.001 | 0.05              | 0.7                                                 | 0.001 | 0.05              |
| 0.8                                              | 0.002 | 0.05              | 0.8                                                 | 0.002 | 0.05              |
| 0.9                                              | 0.002 | 0.05              | 0.9                                                 | 0.002 | 0.05              |
| 1.0                                              | 0.002 | 0.05              | 1.0                                                 | 0.002 | 0.05              |

Concentration parameter (expected value of F statistic) = 209.44  
 Conservative value of concentration parameter (lower limit of one-sided 95% confidence interval) = 209.43

### Bias and type 1 error rate for Mendelian randomization analysis of facial pain on depression

| Using specified value of concentration parameter |       |                   | Using conservative value of concentration parameter |       |                   |
|--------------------------------------------------|-------|-------------------|-----------------------------------------------------|-------|-------------------|
| Overlap proportion                               | Bias  | Type 1 error rate | Overlap proportion                                  | Bias  | Type 1 error rate |
| 0.0                                              | 0.000 | 0.05              | 0.0                                                 | 0.000 | 0.05              |
| 0.1                                              | 0.000 | 0.05              | 0.1                                                 | 0.000 | 0.05              |
| 0.2                                              | 0.000 | 0.05              | 0.2                                                 | 0.000 | 0.05              |
| 0.3                                              | 0.000 | 0.05              | 0.3                                                 | 0.000 | 0.05              |
| 0.4                                              | 0.000 | 0.05              | 0.4                                                 | 0.000 | 0.05              |
| 0.5                                              | 0.000 | 0.05              | 0.5                                                 | 0.000 | 0.05              |
| 0.6                                              | 0.000 | 0.05              | 0.6                                                 | 0.000 | 0.05              |
| 0.7                                              | 0.000 | 0.05              | 0.7                                                 | 0.000 | 0.05              |
| 0.8                                              | 0.001 | 0.05              | 0.8                                                 | 0.001 | 0.05              |
| 0.9                                              | 0.001 | 0.05              | 0.9                                                 | 0.001 | 0.05              |
| 1.0                                              | 0.001 | 0.05              | 1.0                                                 | 0.001 | 0.05              |

Concentration parameter (expected value of F statistic) = 589.08  
 Conservative value of concentration parameter (lower limit of one-sided 95% confidence interval) = 589.08

### Bias and type 1 error rate for Mendelian randomization analysis of neck/shoulder pain on depression

| Using specified value of concentration parameter |       |                   | Using conservative value of concentration parameter |       |                   |
|--------------------------------------------------|-------|-------------------|-----------------------------------------------------|-------|-------------------|
| Overlap proportion                               | Bias  | Type 1 error rate | Overlap proportion                                  | Bias  | Type 1 error rate |
| 0.0                                              | 0.000 | 0.05              | 0.0                                                 | 0.000 | 0.05              |
| 0.1                                              | 0.000 | 0.05              | 0.1                                                 | 0.000 | 0.05              |
| 0.2                                              | 0.000 | 0.05              | 0.2                                                 | 0.000 | 0.05              |
| 0.3                                              | 0.000 | 0.05              | 0.3                                                 | 0.000 | 0.05              |
| 0.4                                              | 0.000 | 0.05              | 0.4                                                 | 0.000 | 0.05              |
| 0.5                                              | 0.000 | 0.05              | 0.5                                                 | 0.000 | 0.05              |
| 0.6                                              | 0.000 | 0.05              | 0.6                                                 | 0.000 | 0.05              |
| 0.7                                              | 0.000 | 0.05              | 0.7                                                 | 0.000 | 0.05              |
| 0.8                                              | 0.000 | 0.05              | 0.8                                                 | 0.000 | 0.05              |
| 0.9                                              | 0.000 | 0.05              | 0.9                                                 | 0.000 | 0.05              |
| 1.0                                              | 0.000 | 0.05              | 1.0                                                 | 0.000 | 0.05              |

Concentration parameter (expected value of F statistic) = 1570.92  
 Conservative value of concentration parameter (lower limit of one-sided 95% confidence interval) = 1570.91

### Bias and type 1 error rate for Mendelian randomization analysis of back pain on depression

| Using specified value of concentration parameter |       |                   | Using conservative value of concentration parameter |       |                   |
|--------------------------------------------------|-------|-------------------|-----------------------------------------------------|-------|-------------------|
| Overlap proportion                               | Bias  | Type 1 error rate | Overlap proportion                                  | Bias  | Type 1 error rate |
| 0.0                                              | 0.000 | 0.05              | 0.0                                                 | 0.000 | 0.05              |
| 0.1                                              | 0.000 | 0.05              | 0.1                                                 | 0.000 | 0.05              |
| 0.2                                              | 0.000 | 0.05              | 0.2                                                 | 0.000 | 0.05              |
| 0.3                                              | 0.000 | 0.05              | 0.3                                                 | 0.000 | 0.05              |
| 0.4                                              | 0.000 | 0.05              | 0.4                                                 | 0.000 | 0.05              |
| 0.5                                              | 0.000 | 0.05              | 0.5                                                 | 0.000 | 0.05              |
| 0.6                                              | 0.000 | 0.05              | 0.6                                                 | 0.000 | 0.05              |
| 0.7                                              | 0.001 | 0.05              | 0.7                                                 | 0.001 | 0.05              |
| 0.8                                              | 0.001 | 0.05              | 0.8                                                 | 0.001 | 0.05              |
| 0.9                                              | 0.001 | 0.05              | 0.9                                                 | 0.001 | 0.05              |
| 1.0                                              | 0.001 | 0.05              | 1.0                                                 | 0.001 | 0.05              |

Concentration parameter (expected value of F statistic) = 496.07  
 Conservative value of concentration parameter (lower limit of one-sided 95% confidence interval) = 496.06

### Bias and type 1 error rate for Mendelian randomization analysis of stomach/abdominal pain on depression

| Using specified value of concentration parameter |       |                   | Using conservative value of concentration parameter |       |                   |
|--------------------------------------------------|-------|-------------------|-----------------------------------------------------|-------|-------------------|
| Overlap proportion                               | Bias  | Type 1 error rate | Overlap proportion                                  | Bias  | Type 1 error rate |
| 0.0                                              | 0.000 | 0.05              | 0.0                                                 | 0.000 | 0.05              |
| 0.1                                              | 0.000 | 0.05              | 0.1                                                 | 0.000 | 0.05              |
| 0.2                                              | 0.000 | 0.05              | 0.2                                                 | 0.000 | 0.05              |
| 0.3                                              | 0.000 | 0.05              | 0.3                                                 | 0.000 | 0.05              |
| 0.4                                              | 0.000 | 0.05              | 0.4                                                 | 0.000 | 0.05              |
| 0.5                                              | 0.001 | 0.05              | 0.5                                                 | 0.001 | 0.05              |
| 0.6                                              | 0.001 | 0.05              | 0.6                                                 | 0.001 | 0.05              |
| 0.7                                              | 0.001 | 0.05              | 0.7                                                 | 0.001 | 0.05              |
| 0.8                                              | 0.001 | 0.05              | 0.8                                                 | 0.001 | 0.05              |
| 0.9                                              | 0.001 | 0.05              | 0.9                                                 | 0.001 | 0.05              |
| 1.0                                              | 0.001 | 0.05              | 1.0                                                 | 0.001 | 0.05              |

Concentration parameter (expected value of F statistic) = 336.61  
 Conservative value of concentration parameter (lower limit of one-sided 95% confidence interval) = 336.61



### Bias and type 1 error rate for Mendelian randomization analysis of hip pain on depression

| Using specified value of concentration parameter |       |                   | Using conservative value of concentration parameter |       |                   |
|--------------------------------------------------|-------|-------------------|-----------------------------------------------------|-------|-------------------|
| Overlap proportion                               | Bias  | Type 1 error rate | Overlap proportion                                  | Bias  | Type 1 error rate |
| 0.0                                              | 0.000 | 0.05              | 0.0                                                 | 0.000 | 0.05              |
| 0.1                                              | 0.000 | 0.05              | 0.1                                                 | 0.000 | 0.05              |
| 0.2                                              | 0.000 | 0.05              | 0.2                                                 | 0.000 | 0.05              |
| 0.3                                              | 0.000 | 0.05              | 0.3                                                 | 0.000 | 0.05              |
| 0.4                                              | 0.000 | 0.05              | 0.4                                                 | 0.000 | 0.05              |
| 0.5                                              | 0.000 | 0.05              | 0.5                                                 | 0.000 | 0.05              |
| 0.6                                              | 0.000 | 0.05              | 0.6                                                 | 0.000 | 0.05              |
| 0.7                                              | 0.000 | 0.05              | 0.7                                                 | 0.000 | 0.05              |
| 0.8                                              | 0.000 | 0.05              | 0.8                                                 | 0.000 | 0.05              |
| 0.9                                              | 0.000 | 0.05              | 0.9                                                 | 0.000 | 0.05              |
| 1.0                                              | 0.000 | 0.05              | 1.0                                                 | 0.000 | 0.05              |

Concentration parameter (expected value of F statistic) = 2356.39  
 Conservative value of concentration parameter (lower limit of one-sided 95% confidence interval) = 2356.38

### Bias and type 1 error rate for Mendelian randomization analysis of knee pain on depression

| Using specified value of concentration parameter |       |                   | Using conservative value of concentration parameter |       |                   |
|--------------------------------------------------|-------|-------------------|-----------------------------------------------------|-------|-------------------|
| Overlap proportion                               | Bias  | Type 1 error rate | Overlap proportion                                  | Bias  | Type 1 error rate |
| 0.0                                              | 0.000 | 0.05              | 0.0                                                 | 0.000 | 0.05              |
| 0.1                                              | 0.000 | 0.05              | 0.1                                                 | 0.000 | 0.05              |
| 0.2                                              | 0.000 | 0.05              | 0.2                                                 | 0.000 | 0.05              |
| 0.3                                              | 0.000 | 0.05              | 0.3                                                 | 0.000 | 0.05              |
| 0.4                                              | 0.000 | 0.05              | 0.4                                                 | 0.000 | 0.05              |
| 0.5                                              | 0.000 | 0.05              | 0.5                                                 | 0.000 | 0.05              |
| 0.6                                              | 0.000 | 0.05              | 0.6                                                 | 0.000 | 0.05              |
| 0.7                                              | 0.000 | 0.05              | 0.7                                                 | 0.000 | 0.05              |
| 0.8                                              | 0.000 | 0.05              | 0.8                                                 | 0.000 | 0.05              |
| 0.9                                              | 0.000 | 0.05              | 0.9                                                 | 0.000 | 0.05              |
| 1.0                                              | 0.000 | 0.05              | 1.0                                                 | 0.000 | 0.05              |

Concentration parameter (expected value of F statistic) = 856.86  
 Conservative value of concentration parameter (lower limit of one-sided 95% confidence interval) = 856.85

### Bias and type 1 error rate for Mendelian randomization analysis of no pain on depression

| Using specified value of concentration parameter |       |                   | Using conservative value of concentration parameter |       |                   |
|--------------------------------------------------|-------|-------------------|-----------------------------------------------------|-------|-------------------|
| Overlap proportion                               | Bias  | Type 1 error rate | Overlap proportion                                  | Bias  | Type 1 error rate |
| 0.0                                              | 0.000 | 0.05              | 0.0                                                 | 0.000 | 0.05              |
| 0.1                                              | 0.000 | 0.05              | 0.1                                                 | 0.000 | 0.05              |
| 0.2                                              | 0.000 | 0.05              | 0.2                                                 | 0.000 | 0.05              |
| 0.3                                              | 0.000 | 0.05              | 0.3                                                 | 0.000 | 0.05              |
| 0.4                                              | 0.001 | 0.05              | 0.4                                                 | 0.001 | 0.05              |
| 0.5                                              | 0.001 | 0.05              | 0.5                                                 | 0.001 | 0.05              |
| 0.6                                              | 0.001 | 0.05              | 0.6                                                 | 0.001 | 0.05              |
| 0.7                                              | 0.001 | 0.05              | 0.7                                                 | 0.001 | 0.05              |
| 0.8                                              | 0.001 | 0.05              | 0.8                                                 | 0.001 | 0.05              |
| 0.9                                              | 0.001 | 0.05              | 0.9                                                 | 0.001 | 0.05              |
| 1.0                                              | 0.002 | 0.05              | 1.0                                                 | 0.002 | 0.05              |

Concentration parameter (expected value of F statistic) = 254.73  
 Conservative value of concentration parameter (lower limit of one-sided 95% confidence interval) = 254.72

### Bias and type 1 error rate for Mendelian randomization analysis of sleeplessness/insomnia on headache

| Using specified value of concentration parameter |       |                   | Using conservative value of concentration parameter |       |                   |
|--------------------------------------------------|-------|-------------------|-----------------------------------------------------|-------|-------------------|
| Overlap proportion                               | Bias  | Type 1 error rate | Overlap proportion                                  | Bias  | Type 1 error rate |
| 0.0                                              | 0.000 | 0.05              | 0.0                                                 | 0.000 | 0.05              |
| 0.1                                              | 0.000 | 0.05              | 0.1                                                 | 0.000 | 0.05              |
| 0.2                                              | 0.000 | 0.05              | 0.2                                                 | 0.000 | 0.05              |
| 0.3                                              | 0.000 | 0.05              | 0.3                                                 | 0.000 | 0.05              |
| 0.4                                              | 0.001 | 0.05              | 0.4                                                 | 0.001 | 0.05              |
| 0.5                                              | 0.001 | 0.05              | 0.5                                                 | 0.001 | 0.05              |
| 0.6                                              | 0.001 | 0.05              | 0.6                                                 | 0.001 | 0.05              |
| 0.7                                              | 0.001 | 0.05              | 0.7                                                 | 0.001 | 0.05              |
| 0.8                                              | 0.001 | 0.05              | 0.8                                                 | 0.001 | 0.05              |
| 0.9                                              | 0.001 | 0.05              | 0.9                                                 | 0.001 | 0.05              |
| 1.0                                              | 0.002 | 0.05              | 1.0                                                 | 0.002 | 0.05              |

### Bias and type 1 error rate for Mendelian randomization analysis of anxiety/panic attacks on headache

| Using specified value of concentration parameter |       |                   | Using conservative value of concentration parameter |       |                   |
|--------------------------------------------------|-------|-------------------|-----------------------------------------------------|-------|-------------------|
| Overlap proportion                               | Bias  | Type 1 error rate | Overlap proportion                                  | Bias  | Type 1 error rate |
| 0.0                                              | 0.000 | 0.05              | 0.0                                                 | 0.000 | 0.05              |
| 0.1                                              | 0.000 | 0.05              | 0.1                                                 | 0.000 | 0.05              |
| 0.2                                              | 0.000 | 0.05              | 0.2                                                 | 0.000 | 0.05              |
| 0.3                                              | 0.000 | 0.05              | 0.3                                                 | 0.000 | 0.05              |
| 0.4                                              | 0.001 | 0.05              | 0.4                                                 | 0.001 | 0.05              |
| 0.5                                              | 0.001 | 0.05              | 0.5                                                 | 0.001 | 0.05              |
| 0.6                                              | 0.001 | 0.05              | 0.6                                                 | 0.001 | 0.05              |
| 0.7                                              | 0.001 | 0.05              | 0.7                                                 | 0.001 | 0.05              |
| 0.8                                              | 0.001 | 0.05              | 0.8                                                 | 0.001 | 0.05              |
| 0.9                                              | 0.001 | 0.05              | 0.9                                                 | 0.001 | 0.05              |
| 1.0                                              | 0.002 | 0.05              | 1.0                                                 | 0.002 | 0.05              |

Concentration parameter (expected value of F statistic) = 254.82

Conservative value of concentration parameter (lower limit of one-sided 95% confidence interval) = 254.82

### Bias and type 1 error rate for Mendelian randomization analysis of depression on headache

| Using specified value of concentration parameter |       |                   | Using conservative value of concentration parameter |       |                   |
|--------------------------------------------------|-------|-------------------|-----------------------------------------------------|-------|-------------------|
| Overlap proportion                               | Bias  | Type 1 error rate | Overlap proportion                                  | Bias  | Type 1 error rate |
| 0.0                                              | 0.000 | 0.05              | 0.0                                                 | 0.000 | 0.05              |
| 0.1                                              | 0.000 | 0.05              | 0.1                                                 | 0.000 | 0.05              |
| 0.2                                              | 0.000 | 0.05              | 0.2                                                 | 0.000 | 0.05              |
| 0.3                                              | 0.000 | 0.05              | 0.3                                                 | 0.000 | 0.05              |
| 0.4                                              | 0.001 | 0.05              | 0.4                                                 | 0.001 | 0.05              |
| 0.5                                              | 0.001 | 0.05              | 0.5                                                 | 0.001 | 0.05              |
| 0.6                                              | 0.001 | 0.05              | 0.6                                                 | 0.001 | 0.05              |
| 0.7                                              | 0.001 | 0.05              | 0.7                                                 | 0.001 | 0.05              |
| 0.8                                              | 0.001 | 0.05              | 0.8                                                 | 0.001 | 0.05              |
| 0.9                                              | 0.001 | 0.05              | 0.9                                                 | 0.001 | 0.05              |
| 1.0                                              | 0.001 | 0.05              | 1.0                                                 | 0.001 | 0.05              |

Concentration parameter (expected value of F statistic) = 295.22

Conservative value of concentration parameter (lower limit of one-sided 95% confidence interval) = 295.21

### Bias and type 1 error rate for Mendelian randomization analysis of sleeplessness/insomnia on facial pain

| Using specified value of concentration parameter |       |                   | Using conservative value of concentration parameter |       |                   |
|--------------------------------------------------|-------|-------------------|-----------------------------------------------------|-------|-------------------|
| Overlap proportion                               | Bias  | Type 1 error rate | Overlap proportion                                  | Bias  | Type 1 error rate |
| 0.0                                              | 0.000 | 0.05              | 0.0                                                 | 0.000 | 0.05              |
| 0.1                                              | 0.000 | 0.05              | 0.1                                                 | 0.000 | 0.05              |
| 0.2                                              | 0.000 | 0.05              | 0.2                                                 | 0.000 | 0.05              |
| 0.3                                              | 0.000 | 0.05              | 0.3                                                 | 0.000 | 0.05              |
| 0.4                                              | 0.001 | 0.05              | 0.4                                                 | 0.001 | 0.05              |
| 0.5                                              | 0.001 | 0.05              | 0.5                                                 | 0.001 | 0.05              |
| 0.6                                              | 0.001 | 0.05              | 0.6                                                 | 0.001 | 0.05              |
| 0.7                                              | 0.001 | 0.05              | 0.7                                                 | 0.001 | 0.05              |
| 0.8                                              | 0.001 | 0.05              | 0.8                                                 | 0.001 | 0.05              |
| 0.9                                              | 0.001 | 0.05              | 0.9                                                 | 0.001 | 0.05              |
| 1.0                                              | 0.002 | 0.05              | 1.0                                                 | 0.002 | 0.05              |

Concentration parameter (expected value of F statistic) = 264.47  
 Conservative value of concentration parameter (lower limit of one-sided 95% confidence interval) = 264.47

### Bias and type 1 error rate for Mendelian randomization analysis of depression on facial pain

| Using specified value of concentration parameter |       |                   | Using conservative value of concentration parameter |       |                   |
|--------------------------------------------------|-------|-------------------|-----------------------------------------------------|-------|-------------------|
| Overlap proportion                               | Bias  | Type 1 error rate | Overlap proportion                                  | Bias  | Type 1 error rate |
| 0.0                                              | 0.000 | 0.05              | 0.0                                                 | 0.000 | 0.05              |
| 0.1                                              | 0.000 | 0.05              | 0.1                                                 | 0.000 | 0.05              |
| 0.2                                              | 0.000 | 0.05              | 0.2                                                 | 0.000 | 0.05              |
| 0.3                                              | 0.000 | 0.05              | 0.3                                                 | 0.000 | 0.05              |
| 0.4                                              | 0.000 | 0.05              | 0.4                                                 | 0.000 | 0.05              |
| 0.5                                              | 0.001 | 0.05              | 0.5                                                 | 0.001 | 0.05              |
| 0.6                                              | 0.001 | 0.05              | 0.6                                                 | 0.001 | 0.05              |
| 0.7                                              | 0.001 | 0.05              | 0.7                                                 | 0.001 | 0.05              |
| 0.8                                              | 0.001 | 0.05              | 0.8                                                 | 0.001 | 0.05              |
| 0.9                                              | 0.001 | 0.05              | 0.9                                                 | 0.001 | 0.05              |
| 1.0                                              | 0.001 | 0.05              | 1.0                                                 | 0.001 | 0.05              |

Concentration parameter (expected value of F statistic) = 377.88  
 Conservative value of concentration parameter (lower limit of one-sided 95% confidence interval) = 377.88

### Bias and type 1 error rate for Mendelian randomization analysis of anxiety/panic attacks on facial pain

| Using specified value of concentration parameter |       |                   | Using conservative value of concentration parameter |       |                   |
|--------------------------------------------------|-------|-------------------|-----------------------------------------------------|-------|-------------------|
| Overlap proportion                               | Bias  | Type 1 error rate | Overlap proportion                                  | Bias  | Type 1 error rate |
| 0.0                                              | 0.000 | 0.05              | 0.0                                                 | 0.000 | 0.05              |
| 0.1                                              | 0.000 | 0.05              | 0.1                                                 | 0.000 | 0.05              |
| 0.2                                              | 0.000 | 0.05              | 0.2                                                 | 0.000 | 0.05              |
| 0.3                                              | 0.000 | 0.05              | 0.3                                                 | 0.000 | 0.05              |
| 0.4                                              | 0.000 | 0.05              | 0.4                                                 | 0.000 | 0.05              |
| 0.5                                              | 0.000 | 0.05              | 0.5                                                 | 0.000 | 0.05              |
| 0.6                                              | 0.000 | 0.05              | 0.6                                                 | 0.000 | 0.05              |
| 0.7                                              | 0.000 | 0.05              | 0.7                                                 | 0.000 | 0.05              |
| 0.8                                              | 0.000 | 0.05              | 0.8                                                 | 0.000 | 0.05              |
| 0.9                                              | 0.000 | 0.05              | 0.9                                                 | 0.000 | 0.05              |
| 1.0                                              | 0.000 | 0.05              | 1.0                                                 | 0.000 | 0.05              |

Concentration parameter (expected value of F statistic) = 860.08  
 Conservative value of concentration parameter (lower limit of one-sided 95% confidence interval) = 860.07

### Bias and type 1 error rate for Mendelian randomization analysis of sleeplessness/insomnia on neck/shoulder pain

| Using specified value of concentration parameter |       |                   | Using conservative value of concentration parameter |       |                   |
|--------------------------------------------------|-------|-------------------|-----------------------------------------------------|-------|-------------------|
| Overlap proportion                               | Bias  | Type 1 error rate | Overlap proportion                                  | Bias  | Type 1 error rate |
| 0.0                                              | 0.000 | 0.05              | 0.0                                                 | 0.000 | 0.05              |
| 0.1                                              | 0.000 | 0.05              | 0.1                                                 | 0.000 | 0.05              |
| 0.2                                              | 0.000 | 0.05              | 0.2                                                 | 0.000 | 0.05              |
| 0.3                                              | 0.000 | 0.05              | 0.3                                                 | 0.000 | 0.05              |
| 0.4                                              | 0.001 | 0.05              | 0.4                                                 | 0.001 | 0.05              |
| 0.5                                              | 0.001 | 0.05              | 0.5                                                 | 0.001 | 0.05              |
| 0.6                                              | 0.001 | 0.05              | 0.6                                                 | 0.001 | 0.05              |
| 0.7                                              | 0.001 | 0.05              | 0.7                                                 | 0.001 | 0.05              |
| 0.8                                              | 0.001 | 0.05              | 0.8                                                 | 0.001 | 0.05              |
| 0.9                                              | 0.001 | 0.05              | 0.9                                                 | 0.001 | 0.05              |
| 1.0                                              | 0.002 | 0.05              | 1.0                                                 | 0.002 | 0.05              |

Concentration parameter (expected value of F statistic) = 254.68  
 Conservative value of concentration parameter (lower limit of one-sided 95% confidence interval) = 254.67

### Bias and type 1 error rate for Mendelian randomization analysis of anxiety/panic attacks on neck/shoulder pain

| Using specified value of concentration parameter |       |                   | Using conservative value of concentration parameter |       |                   |
|--------------------------------------------------|-------|-------------------|-----------------------------------------------------|-------|-------------------|
| Overlap proportion                               | Bias  | Type 1 error rate | Overlap proportion                                  | Bias  | Type 1 error rate |
| 0.0                                              | 0.000 | 0.05              | 0.0                                                 | 0.000 | 0.05              |
| 0.1                                              | 0.000 | 0.05              | 0.1                                                 | 0.000 | 0.05              |
| 0.2                                              | 0.000 | 0.05              | 0.2                                                 | 0.000 | 0.05              |
| 0.3                                              | 0.000 | 0.05              | 0.3                                                 | 0.000 | 0.05              |
| 0.4                                              | 0.000 | 0.05              | 0.4                                                 | 0.000 | 0.05              |
| 0.5                                              | 0.000 | 0.05              | 0.5                                                 | 0.000 | 0.05              |
| 0.6                                              | 0.000 | 0.05              | 0.6                                                 | 0.000 | 0.05              |
| 0.7                                              | 0.000 | 0.05              | 0.7                                                 | 0.000 | 0.05              |
| 0.8                                              | 0.001 | 0.05              | 0.8                                                 | 0.001 | 0.05              |
| 0.9                                              | 0.001 | 0.05              | 0.9                                                 | 0.001 | 0.05              |
| 1.0                                              | 0.001 | 0.05              | 1.0                                                 | 0.001 | 0.05              |

Concentration parameter (expected value of F statistic) = 573.38  
 Conservative value of concentration parameter (lower limit of one-sided 95% confidence interval) = 573.37

### Bias and type 1 error rate for Mendelian randomization analysis of depression on neck/shoulder pain

| Using specified value of concentration parameter |       |                   | Using conservative value of concentration parameter |       |                   |
|--------------------------------------------------|-------|-------------------|-----------------------------------------------------|-------|-------------------|
| Overlap proportion                               | Bias  | Type 1 error rate | Overlap proportion                                  | Bias  | Type 1 error rate |
| 0.0                                              | 0.000 | 0.05              | 0.0                                                 | 0.000 | 0.05              |
| 0.1                                              | 0.000 | 0.05              | 0.1                                                 | 0.000 | 0.05              |
| 0.2                                              | 0.000 | 0.05              | 0.2                                                 | 0.000 | 0.05              |
| 0.3                                              | 0.000 | 0.05              | 0.3                                                 | 0.000 | 0.05              |
| 0.4                                              | 0.001 | 0.05              | 0.4                                                 | 0.001 | 0.05              |
| 0.5                                              | 0.001 | 0.05              | 0.5                                                 | 0.001 | 0.05              |
| 0.6                                              | 0.001 | 0.05              | 0.6                                                 | 0.001 | 0.05              |
| 0.7                                              | 0.001 | 0.05              | 0.7                                                 | 0.001 | 0.05              |
| 0.8                                              | 0.001 | 0.05              | 0.8                                                 | 0.001 | 0.05              |
| 0.9                                              | 0.001 | 0.05              | 0.9                                                 | 0.001 | 0.05              |
| 1.0                                              | 0.001 | 0.05              | 1.0                                                 | 0.001 | 0.05              |

Concentration parameter (expected value of F statistic) = 295.22  
 Conservative value of concentration parameter (lower limit of one-sided 95% confidence interval) = 295.21

### Bias and type 1 error rate for Mendelian randomization analysis of sleeplessness/insomnia on back pain

| Using specified value of concentration parameter |       |                   | Using conservative value of concentration parameter |       |                   |
|--------------------------------------------------|-------|-------------------|-----------------------------------------------------|-------|-------------------|
| Overlap proportion                               | Bias  | Type 1 error rate | Overlap proportion                                  | Bias  | Type 1 error rate |
| 0.0                                              | 0.000 | 0.05              | 0.0                                                 | 0.000 | 0.05              |
| 0.1                                              | 0.000 | 0.05              | 0.1                                                 | 0.000 | 0.05              |
| 0.2                                              | 0.000 | 0.05              | 0.2                                                 | 0.000 | 0.05              |
| 0.3                                              | 0.000 | 0.05              | 0.3                                                 | 0.000 | 0.05              |
| 0.4                                              | 0.001 | 0.05              | 0.4                                                 | 0.001 | 0.05              |
| 0.5                                              | 0.001 | 0.05              | 0.5                                                 | 0.001 | 0.05              |
| 0.6                                              | 0.001 | 0.05              | 0.6                                                 | 0.001 | 0.05              |
| 0.7                                              | 0.001 | 0.05              | 0.7                                                 | 0.001 | 0.05              |
| 0.8                                              | 0.001 | 0.05              | 0.8                                                 | 0.001 | 0.05              |
| 0.9                                              | 0.001 | 0.05              | 0.9                                                 | 0.001 | 0.05              |
| 1.0                                              | 0.002 | 0.05              | 1.0                                                 | 0.002 | 0.05              |

Concentration parameter (expected value of F statistic) = 254.68  
 Conservative value of concentration parameter (lower limit of one-sided 95% confidence interval) = 254.67

### Bias and type 1 error rate for Mendelian randomization analysis of anxiety/panic attacks on back pain

| Using specified value of concentration parameter |       |                   | Using conservative value of concentration parameter |       |                   |
|--------------------------------------------------|-------|-------------------|-----------------------------------------------------|-------|-------------------|
| Overlap proportion                               | Bias  | Type 1 error rate | Overlap proportion                                  | Bias  | Type 1 error rate |
| 0.0                                              | 0.000 | 0.05              | 0.0                                                 | 0.000 | 0.05              |
| 0.1                                              | 0.000 | 0.05              | 0.1                                                 | 0.000 | 0.05              |
| 0.2                                              | 0.000 | 0.05              | 0.2                                                 | 0.000 | 0.05              |
| 0.3                                              | 0.000 | 0.05              | 0.3                                                 | 0.000 | 0.05              |
| 0.4                                              | 0.000 | 0.05              | 0.4                                                 | 0.000 | 0.05              |
| 0.5                                              | 0.000 | 0.05              | 0.5                                                 | 0.000 | 0.05              |
| 0.6                                              | 0.000 | 0.05              | 0.6                                                 | 0.000 | 0.05              |
| 0.7                                              | 0.000 | 0.05              | 0.7                                                 | 0.000 | 0.05              |
| 0.8                                              | 0.001 | 0.05              | 0.8                                                 | 0.001 | 0.05              |
| 0.9                                              | 0.001 | 0.05              | 0.9                                                 | 0.001 | 0.05              |
| 1.0                                              | 0.001 | 0.05              | 1.0                                                 | 0.001 | 0.05              |

Concentration parameter (expected value of F statistic) = 573.38  
 Conservative value of concentration parameter (lower limit of one-sided 95% confidence interval) = 573.37

### Bias and type 1 error rate for Mendelian randomization analysis of depression on back pain

| Using specified value of concentration parameter |       |                   | Using conservative value of concentration parameter |       |                   |
|--------------------------------------------------|-------|-------------------|-----------------------------------------------------|-------|-------------------|
| Overlap proportion                               | Bias  | Type 1 error rate | Overlap proportion                                  | Bias  | Type 1 error rate |
| 0.0                                              | 0.000 | 0.05              | 0.0                                                 | 0.000 | 0.05              |
| 0.1                                              | 0.000 | 0.05              | 0.1                                                 | 0.000 | 0.05              |
| 0.2                                              | 0.000 | 0.05              | 0.2                                                 | 0.000 | 0.05              |
| 0.3                                              | 0.000 | 0.05              | 0.3                                                 | 0.000 | 0.05              |
| 0.4                                              | 0.001 | 0.05              | 0.4                                                 | 0.001 | 0.05              |
| 0.5                                              | 0.001 | 0.05              | 0.5                                                 | 0.001 | 0.05              |
| 0.6                                              | 0.001 | 0.05              | 0.6                                                 | 0.001 | 0.05              |
| 0.7                                              | 0.001 | 0.05              | 0.7                                                 | 0.001 | 0.05              |
| 0.8                                              | 0.001 | 0.05              | 0.8                                                 | 0.001 | 0.05              |
| 0.9                                              | 0.001 | 0.05              | 0.9                                                 | 0.001 | 0.05              |
| 1.0                                              | 0.001 | 0.05              | 1.0                                                 | 0.001 | 0.05              |

Concentration parameter (expected value of F statistic) = 295.22  
 Conservative value of concentration parameter (lower limit of one-sided 95% confidence interval) = 295.21

### Bias and type 1 error rate for Mendelian randomization analysis of sleeplessness/insomnia on stomach/abdominal pain

| Using specified value of concentration parameter |       |                   | Using conservative value of concentration parameter |       |                   |
|--------------------------------------------------|-------|-------------------|-----------------------------------------------------|-------|-------------------|
| Overlap proportion                               | Bias  | Type 1 error rate | Overlap proportion                                  | Bias  | Type 1 error rate |
| 0.0                                              | 0.000 | 0.05              | 0.0                                                 | 0.000 | 0.05              |
| 0.1                                              | 0.000 | 0.05              | 0.1                                                 | 0.000 | 0.05              |
| 0.2                                              | 0.000 | 0.05              | 0.2                                                 | 0.000 | 0.05              |
| 0.3                                              | 0.000 | 0.05              | 0.3                                                 | 0.000 | 0.05              |
| 0.4                                              | 0.001 | 0.05              | 0.4                                                 | 0.001 | 0.05              |
| 0.5                                              | 0.001 | 0.05              | 0.5                                                 | 0.001 | 0.05              |
| 0.6                                              | 0.001 | 0.05              | 0.6                                                 | 0.001 | 0.05              |
| 0.7                                              | 0.001 | 0.05              | 0.7                                                 | 0.001 | 0.05              |
| 0.8                                              | 0.001 | 0.05              | 0.8                                                 | 0.001 | 0.05              |
| 0.9                                              | 0.001 | 0.05              | 0.9                                                 | 0.001 | 0.05              |
| 1.0                                              | 0.002 | 0.05              | 1.0                                                 | 0.002 | 0.05              |

Concentration parameter (expected value of F statistic) = 254.68  
 Conservative value of concentration parameter (lower limit of one-sided 95% confidence interval) = 254.67

### Bias and type 1 error rate for Mendelian randomization analysis of anxiety/panic attacks on stomach/abdominal pain

| Using specified value of concentration parameter |       |                   | Using conservative value of concentration parameter |       |                   |
|--------------------------------------------------|-------|-------------------|-----------------------------------------------------|-------|-------------------|
| Overlap proportion                               | Bias  | Type 1 error rate | Overlap proportion                                  | Bias  | Type 1 error rate |
| 0.0                                              | 0.000 | 0.05              | 0.0                                                 | 0.000 | 0.05              |
| 0.1                                              | 0.000 | 0.05              | 0.1                                                 | 0.000 | 0.05              |
| 0.2                                              | 0.000 | 0.05              | 0.2                                                 | 0.000 | 0.05              |
| 0.3                                              | 0.000 | 0.05              | 0.3                                                 | 0.000 | 0.05              |
| 0.4                                              | 0.001 | 0.05              | 0.4                                                 | 0.001 | 0.05              |
| 0.5                                              | 0.001 | 0.05              | 0.5                                                 | 0.001 | 0.05              |
| 0.6                                              | 0.001 | 0.05              | 0.6                                                 | 0.001 | 0.05              |
| 0.7                                              | 0.001 | 0.05              | 0.7                                                 | 0.001 | 0.05              |
| 0.8                                              | 0.001 | 0.05              | 0.8                                                 | 0.001 | 0.05              |
| 0.9                                              | 0.001 | 0.05              | 0.9                                                 | 0.001 | 0.05              |
| 1.0                                              | 0.002 | 0.05              | 1.0                                                 | 0.002 | 0.05              |

Concentration parameter (expected value of F statistic) = 254.68  
 Conservative value of concentration parameter (lower limit of one-sided 95% confidence interval) = 254.67

### Bias and type 1 error rate for Mendelian randomization analysis of depression on stomach/abdominal pain

| Using specified value of concentration parameter |       |                   | Using conservative value of concentration parameter |       |                   |
|--------------------------------------------------|-------|-------------------|-----------------------------------------------------|-------|-------------------|
| Overlap proportion                               | Bias  | Type 1 error rate | Overlap proportion                                  | Bias  | Type 1 error rate |
| 0.0                                              | 0.000 | 0.05              | 0.0                                                 | 0.000 | 0.05              |
| 0.1                                              | 0.000 | 0.05              | 0.1                                                 | 0.000 | 0.05              |
| 0.2                                              | 0.000 | 0.05              | 0.2                                                 | 0.000 | 0.05              |
| 0.3                                              | 0.000 | 0.05              | 0.3                                                 | 0.000 | 0.05              |
| 0.4                                              | 0.001 | 0.05              | 0.4                                                 | 0.001 | 0.05              |
| 0.5                                              | 0.001 | 0.05              | 0.5                                                 | 0.001 | 0.05              |
| 0.6                                              | 0.001 | 0.05              | 0.6                                                 | 0.001 | 0.05              |
| 0.7                                              | 0.001 | 0.05              | 0.7                                                 | 0.001 | 0.05              |
| 0.8                                              | 0.001 | 0.05              | 0.8                                                 | 0.001 | 0.05              |
| 0.9                                              | 0.001 | 0.05              | 0.9                                                 | 0.001 | 0.05              |
| 1.0                                              | 0.001 | 0.05              | 1.0                                                 | 0.001 | 0.05              |

Concentration parameter (expected value of F statistic) = 295.22  
 Conservative value of concentration parameter (lower limit of one-sided 95% confidence interval) = 295.21

### Bias and type 1 error rate for Mendelian randomization analysis of sleeplessness/insomnia on hip pain

| Using specified value of concentration parameter |       |                   | Using conservative value of concentration parameter |       |                   |
|--------------------------------------------------|-------|-------------------|-----------------------------------------------------|-------|-------------------|
| Overlap proportion                               | Bias  | Type 1 error rate | Overlap proportion                                  | Bias  | Type 1 error rate |
| 0.0                                              | 0.000 | 0.05              | 0.0                                                 | 0.000 | 0.05              |
| 0.1                                              | 0.000 | 0.05              | 0.1                                                 | 0.000 | 0.05              |
| 0.2                                              | 0.000 | 0.05              | 0.2                                                 | 0.000 | 0.05              |
| 0.3                                              | 0.000 | 0.05              | 0.3                                                 | 0.000 | 0.05              |
| 0.4                                              | 0.001 | 0.05              | 0.4                                                 | 0.001 | 0.05              |
| 0.5                                              | 0.001 | 0.05              | 0.5                                                 | 0.001 | 0.05              |
| 0.6                                              | 0.001 | 0.05              | 0.6                                                 | 0.001 | 0.05              |
| 0.7                                              | 0.001 | 0.05              | 0.7                                                 | 0.001 | 0.05              |
| 0.8                                              | 0.001 | 0.05              | 0.8                                                 | 0.001 | 0.05              |
| 0.9                                              | 0.001 | 0.05              | 0.9                                                 | 0.001 | 0.05              |
| 1.0                                              | 0.002 | 0.05              | 1.0                                                 | 0.002 | 0.05              |

Concentration parameter (expected value of F statistic) = 254.68  
 Conservative value of concentration parameter (lower limit of one-sided 95% confidence interval) = 254.67

### Bias and type 1 error rate for Mendelian randomization analysis of anxiety/panic attacks on hip pain

| Using specified value of concentration parameter |       |                   | Using conservative value of concentration parameter |       |                   |
|--------------------------------------------------|-------|-------------------|-----------------------------------------------------|-------|-------------------|
| Overlap proportion                               | Bias  | Type 1 error rate | Overlap proportion                                  | Bias  | Type 1 error rate |
| 0.0                                              | 0.000 | 0.05              | 0.0                                                 | 0.000 | 0.05              |
| 0.1                                              | 0.000 | 0.05              | 0.1                                                 | 0.000 | 0.05              |
| 0.2                                              | 0.000 | 0.05              | 0.2                                                 | 0.000 | 0.05              |
| 0.3                                              | 0.000 | 0.05              | 0.3                                                 | 0.000 | 0.05              |
| 0.4                                              | 0.000 | 0.05              | 0.4                                                 | 0.000 | 0.05              |
| 0.5                                              | 0.000 | 0.05              | 0.5                                                 | 0.000 | 0.05              |
| 0.6                                              | 0.000 | 0.05              | 0.6                                                 | 0.000 | 0.05              |
| 0.7                                              | 0.000 | 0.05              | 0.7                                                 | 0.000 | 0.05              |
| 0.8                                              | 0.001 | 0.05              | 0.8                                                 | 0.001 | 0.05              |
| 0.9                                              | 0.001 | 0.05              | 0.9                                                 | 0.001 | 0.05              |
| 1.0                                              | 0.001 | 0.05              | 1.0                                                 | 0.001 | 0.05              |

Concentration parameter (expected value of F statistic) = 573.38  
 Conservative value of concentration parameter (lower limit of one-sided 95% confidence interval) = 573.37

### Bias and type 1 error rate for Mendelian randomization analysis of depression on hip pain

| Using specified value of concentration parameter |       |                   | Using conservative value of concentration parameter |       |                   |
|--------------------------------------------------|-------|-------------------|-----------------------------------------------------|-------|-------------------|
| Overlap proportion                               | Bias  | Type 1 error rate | Overlap proportion                                  | Bias  | Type 1 error rate |
| 0.0                                              | 0.000 | 0.05              | 0.0                                                 | 0.000 | 0.05              |
| 0.1                                              | 0.000 | 0.05              | 0.1                                                 | 0.000 | 0.05              |
| 0.2                                              | 0.000 | 0.05              | 0.2                                                 | 0.000 | 0.05              |
| 0.3                                              | 0.000 | 0.05              | 0.3                                                 | 0.000 | 0.05              |
| 0.4                                              | 0.001 | 0.05              | 0.4                                                 | 0.001 | 0.05              |
| 0.5                                              | 0.001 | 0.05              | 0.5                                                 | 0.001 | 0.05              |
| 0.6                                              | 0.001 | 0.05              | 0.6                                                 | 0.001 | 0.05              |
| 0.7                                              | 0.001 | 0.05              | 0.7                                                 | 0.001 | 0.05              |
| 0.8                                              | 0.001 | 0.05              | 0.8                                                 | 0.001 | 0.05              |
| 0.9                                              | 0.001 | 0.05              | 0.9                                                 | 0.001 | 0.05              |
| 1.0                                              | 0.001 | 0.05              | 1.0                                                 | 0.001 | 0.05              |

Concentration parameter (expected value of F statistic) = 295.22  
 Conservative value of concentration parameter (lower limit of one-sided 95% confidence interval) = 295.21

### Bias and type 1 error rate for Mendelian randomization analysis of sleeplessness/insomnia on knee pain

| Using specified value of concentration parameter |       |                   | Using conservative value of concentration parameter |       |                   |
|--------------------------------------------------|-------|-------------------|-----------------------------------------------------|-------|-------------------|
| Overlap proportion                               | Bias  | Type 1 error rate | Overlap proportion                                  | Bias  | Type 1 error rate |
| 0.0                                              | 0.000 | 0.05              | 0.0                                                 | 0.000 | 0.05              |
| 0.1                                              | 0.000 | 0.05              | 0.1                                                 | 0.000 | 0.05              |
| 0.2                                              | 0.000 | 0.05              | 0.2                                                 | 0.000 | 0.05              |
| 0.3                                              | 0.000 | 0.05              | 0.3                                                 | 0.000 | 0.05              |
| 0.4                                              | 0.001 | 0.05              | 0.4                                                 | 0.001 | 0.05              |
| 0.5                                              | 0.001 | 0.05              | 0.5                                                 | 0.001 | 0.05              |
| 0.6                                              | 0.001 | 0.05              | 0.6                                                 | 0.001 | 0.05              |
| 0.7                                              | 0.001 | 0.05              | 0.7                                                 | 0.001 | 0.05              |
| 0.8                                              | 0.001 | 0.05              | 0.8                                                 | 0.001 | 0.05              |
| 0.9                                              | 0.001 | 0.05              | 0.9                                                 | 0.001 | 0.05              |
| 1.0                                              | 0.002 | 0.05              | 1.0                                                 | 0.002 | 0.05              |

Concentration parameter (expected value of F statistic) = 254.68  
 Conservative value of concentration parameter (lower limit of one-sided 95% confidence interval) = 254.67

### Bias and type 1 error rate for Mendelian randomization analysis of anxiety/panic attacks on knee pain

| Using specified value of concentration parameter |       |                   | Using conservative value of concentration parameter |       |                   |
|--------------------------------------------------|-------|-------------------|-----------------------------------------------------|-------|-------------------|
| Overlap proportion                               | Bias  | Type 1 error rate | Overlap proportion                                  | Bias  | Type 1 error rate |
| 0.0                                              | 0.000 | 0.05              | 0.0                                                 | 0.000 | 0.05              |
| 0.1                                              | 0.000 | 0.05              | 0.1                                                 | 0.000 | 0.05              |
| 0.2                                              | 0.000 | 0.05              | 0.2                                                 | 0.000 | 0.05              |
| 0.3                                              | 0.000 | 0.05              | 0.3                                                 | 0.000 | 0.05              |
| 0.4                                              | 0.000 | 0.05              | 0.4                                                 | 0.000 | 0.05              |
| 0.5                                              | 0.000 | 0.05              | 0.5                                                 | 0.000 | 0.05              |
| 0.6                                              | 0.000 | 0.05              | 0.6                                                 | 0.000 | 0.05              |
| 0.7                                              | 0.000 | 0.05              | 0.7                                                 | 0.000 | 0.05              |
| 0.8                                              | 0.001 | 0.05              | 0.8                                                 | 0.001 | 0.05              |
| 0.9                                              | 0.001 | 0.05              | 0.9                                                 | 0.001 | 0.05              |
| 1.0                                              | 0.001 | 0.05              | 1.0                                                 | 0.001 | 0.05              |

Concentration parameter (expected value of F statistic) = 573.38  
 Conservative value of concentration parameter (lower limit of one-sided 95% confidence interval) = 573.37

### Bias and type 1 error rate for Mendelian randomization analysis of depression on knee pain

| Using specified value of concentration parameter |       |                   | Using conservative value of concentration parameter |       |                   |
|--------------------------------------------------|-------|-------------------|-----------------------------------------------------|-------|-------------------|
| Overlap proportion                               | Bias  | Type 1 error rate | Overlap proportion                                  | Bias  | Type 1 error rate |
| 0.0                                              | 0.000 | 0.05              | 0.0                                                 | 0.000 | 0.05              |
| 0.1                                              | 0.000 | 0.05              | 0.1                                                 | 0.000 | 0.05              |
| 0.2                                              | 0.000 | 0.05              | 0.2                                                 | 0.000 | 0.05              |
| 0.3                                              | 0.000 | 0.05              | 0.3                                                 | 0.000 | 0.05              |
| 0.4                                              | 0.001 | 0.05              | 0.4                                                 | 0.001 | 0.05              |
| 0.5                                              | 0.001 | 0.05              | 0.5                                                 | 0.001 | 0.05              |
| 0.6                                              | 0.001 | 0.05              | 0.6                                                 | 0.001 | 0.05              |
| 0.7                                              | 0.001 | 0.05              | 0.7                                                 | 0.001 | 0.05              |
| 0.8                                              | 0.001 | 0.05              | 0.8                                                 | 0.001 | 0.05              |
| 0.9                                              | 0.001 | 0.05              | 0.9                                                 | 0.001 | 0.05              |
| 1.0                                              | 0.001 | 0.05              | 1.0                                                 | 0.001 | 0.05              |

Concentration parameter (expected value of F statistic) = 295.22  
 Conservative value of concentration parameter (lower limit of one-sided 95% confidence interval) = 295.21



### Bias and type 1 error rate for Mendelian randomization analysis of sleeplessness/insomnia on no pain

| Using specified value of concentration parameter |       |                   | Using conservative value of concentration parameter |       |                   |
|--------------------------------------------------|-------|-------------------|-----------------------------------------------------|-------|-------------------|
| Overlap proportion                               | Bias  | Type 1 error rate | Overlap proportion                                  | Bias  | Type 1 error rate |
| 0.0                                              | 0.000 | 0.05              | 0.0                                                 | 0.000 | 0.05              |
| 0.1                                              | 0.000 | 0.05              | 0.1                                                 | 0.000 | 0.05              |
| 0.2                                              | 0.000 | 0.05              | 0.2                                                 | 0.000 | 0.05              |
| 0.3                                              | 0.000 | 0.05              | 0.3                                                 | 0.000 | 0.05              |
| 0.4                                              | 0.001 | 0.05              | 0.4                                                 | 0.001 | 0.05              |
| 0.5                                              | 0.001 | 0.05              | 0.5                                                 | 0.001 | 0.05              |
| 0.6                                              | 0.001 | 0.05              | 0.6                                                 | 0.001 | 0.05              |
| 0.7                                              | 0.001 | 0.05              | 0.7                                                 | 0.001 | 0.05              |
| 0.8                                              | 0.001 | 0.05              | 0.8                                                 | 0.001 | 0.05              |
| 0.9                                              | 0.001 | 0.05              | 0.9                                                 | 0.001 | 0.05              |
| 1.0                                              | 0.002 | 0.05              | 1.0                                                 | 0.002 | 0.05              |

Concentration parameter (expected value of F statistic) = 254.68  
 Conservative value of concentration parameter (lower limit of one-sided 95% confidence interval) = 254.67

### Bias and type 1 error rate for Mendelian randomization analysis of anxiety/panic attacks on no pain

| Using specified value of concentration parameter |       |                   | Using conservative value of concentration parameter |       |                   |
|--------------------------------------------------|-------|-------------------|-----------------------------------------------------|-------|-------------------|
| Overlap proportion                               | Bias  | Type 1 error rate | Overlap proportion                                  | Bias  | Type 1 error rate |
| 0.0                                              | 0.000 | 0.05              | 0.0                                                 | 0.000 | 0.05              |
| 0.1                                              | 0.000 | 0.05              | 0.1                                                 | 0.000 | 0.05              |
| 0.2                                              | 0.000 | 0.05              | 0.2                                                 | 0.000 | 0.05              |
| 0.3                                              | 0.000 | 0.05              | 0.3                                                 | 0.000 | 0.05              |
| 0.4                                              | 0.000 | 0.05              | 0.4                                                 | 0.000 | 0.05              |
| 0.5                                              | 0.000 | 0.05              | 0.5                                                 | 0.000 | 0.05              |
| 0.6                                              | 0.000 | 0.05              | 0.6                                                 | 0.000 | 0.05              |
| 0.7                                              | 0.000 | 0.05              | 0.7                                                 | 0.000 | 0.05              |
| 0.8                                              | 0.001 | 0.05              | 0.8                                                 | 0.001 | 0.05              |
| 0.9                                              | 0.001 | 0.05              | 0.9                                                 | 0.001 | 0.05              |
| 1.0                                              | 0.001 | 0.05              | 1.0                                                 | 0.001 | 0.05              |

Concentration parameter (expected value of F statistic) = 573.38  
 Conservative value of concentration parameter (lower limit of one-sided 95% confidence interval) = 573.37

### Bias and type 1 error rate for Mendelian randomization analysis of depression on no pain

| Using specified value of concentration parameter |       |                   | Using conservative value of concentration parameter |       |                   |
|--------------------------------------------------|-------|-------------------|-----------------------------------------------------|-------|-------------------|
| Overlap proportion                               | Bias  | Type 1 error rate | Overlap proportion                                  | Bias  | Type 1 error rate |
| 0.0                                              | 0.000 | 0.05              | 0.0                                                 | 0.000 | 0.05              |
| 0.1                                              | 0.000 | 0.05              | 0.1                                                 | 0.000 | 0.05              |
| 0.2                                              | 0.000 | 0.05              | 0.2                                                 | 0.000 | 0.05              |
| 0.3                                              | 0.000 | 0.05              | 0.3                                                 | 0.000 | 0.05              |
| 0.4                                              | 0.001 | 0.05              | 0.4                                                 | 0.001 | 0.05              |
| 0.5                                              | 0.001 | 0.05              | 0.5                                                 | 0.001 | 0.05              |
| 0.6                                              | 0.001 | 0.05              | 0.6                                                 | 0.001 | 0.05              |
| 0.7                                              | 0.001 | 0.05              | 0.7                                                 | 0.001 | 0.05              |
| 0.8                                              | 0.001 | 0.05              | 0.8                                                 | 0.001 | 0.05              |
| 0.9                                              | 0.001 | 0.05              | 0.9                                                 | 0.001 | 0.05              |
| 1.0                                              | 0.001 | 0.05              | 1.0                                                 | 0.001 | 0.05              |

Concentration parameter (expected value of F statistic) = 295.22  
 Conservative value of concentration parameter (lower limit of one-sided 95% confidence interval) = 295.21
